# Supplementary material
Source: publisher figshare collection journal article supplement (https://gsajournals.figshare.com/ndownloader/files/30643005)
Supplement: Supplementary file 1 [file 30643005]

## Sheet: Budak
SeqName	chromosome	start	end	strand	MCBI accession	Gene name	Length (bp)	#Hits	e-Value	sim mean	#GO	GO IDs	GO Names	Enzyme Codes	Enzyme Names
evm.model.Aet_chr_1.1401	Chr1	54788966	54795913	+	XM_020306815.2	phosphoinositide phospholipase C 2-like	1761	20	0.0	95.06	4	P:GO:0016042; P:GO:0048015; F:GO:0004435; C:GO:0005886	P:lipid catabolic process; P:phosphatidylinositol-mediated signaling; F:phosphatidylinositol phospholipase C activity; C:plasma membrane	EC:3.1.4; EC:3.1; EC:3; EC:3.1.4.11; EC:3.1.4.3; EC:3.1.1	Acting on ester bonds; Acting on ester bonds; Hydrolases; Phosphoinositide phospholipase C; Phospholipase C; Acting on ester bonds
evm.model.Aet_chr_1.2128	Chr1	104102108	104106515	-	XM_020309950.2	Gibberellin 2-beta-dioxygenase 2	1122	20	0.0	88.53	7	P:GO:0009416; P:GO:0045487; F:GO:0046872; F:GO:0052634; F:GO:0102111; F:GO:0102652; F:GO:0102924	P:response to light stimulus; P:gibberellin catabolic process; F:metal ion binding; F:C-19 gibberellin 2-beta-dioxygenase activity; F:gibberellin A20,2-oxoglutarate:oxygen oxidoreductase activity; F:gibberellin A9,2-oxoglutarate:oxygen oxidoreductase activity; F:gibberellin A44,2-oxoglutarate:oxygen oxidoreductase activity	EC:1.14.11; EC:1; EC:1.14; EC:1.14.11.13	Acting on paired donors, with incorporation or reduction of molecular oxygen. The oxygen incorporated need not be derived from O(2); Oxidoreductases; Acting on paired donors, with incorporation or reduction of molecular oxygen. The oxygen incorporated need not be derived from O(2); Gibberellin 2-beta-dioxygenase
evm.model.Aet_chr_1.2200	Chr1	110685267	110690433	-	XM_020336895.2	zinc transporter 6	1206	20	0.0	89.85	4	P:GO:0071577; F:GO:0005385; C:GO:0005886; C:GO:0016021	P:zinc ion transmembrane transport; F:zinc ion transmembrane transporter activity; C:plasma membrane; C:integral component of membrane	EC:7	Translocases
evm.model.Aet_chr_1.2494	Chr1	135187647	135190465	-	XM_020333392.2	zinc transporter 7	1161	20	0.0	90.36	4	P:GO:0071577; F:GO:0005385; C:GO:0005886; C:GO:0016021	P:zinc ion transmembrane transport; F:zinc ion transmembrane transporter activity; C:plasma membrane; C:integral component of membrane	EC:7	Translocases
evm.model.Aet_chr_1.3299	Chr1	210339497	210342472	-	XM_040401825.1	Cyclin-dependent kinase inhibitor 5	576	20	1.74628e-100	75.49	3	P:GO:0045736; F:GO:0004861; C:GO:0005634	P:negative regulation of cyclin-dependent protein serine/threonine kinase activity; F:cyclin-dependent protein serine/threonine kinase inhibitor activity; C:nucleus	EC:2.7.1	Transferring phosphorus-containing groups
evm.model.Aet_chr_1.4318	Chr1	287226595	287229227	+	XM_020343263.2	probable inactive shikimate kinase like 2, chloroplastic	1137	20	0.0	91.95	3	P:GO:0016310; F:GO:0004765; C:GO:0009507	P:phosphorylation; F:shikimate kinase activity; C:chloroplast	EC:2.7.1; EC:2.7; EC:2; EC:2.7.1.71	Transferring phosphorus-containing groups; Transferring phosphorus-containing groups; Transferases; Shikimate kinase
evm.model.Aet_chr_1.4335	Chr1	289432521	289434725	+	XM_020303740.2	abscisic acid 8'-hydroxylase 4	1515	20	0.0	87.07	9	P:GO:0007275; P:GO:0010268; P:GO:0016125; P:GO:0016132; F:GO:0004497; F:GO:0005506; F:GO:0016705; F:GO:0020037; C:GO:0016021	P:multicellular organism development; P:brassinosteroid homeostasis; P:sterol metabolic process; P:brassinosteroid biosynthetic process; F:monooxygenase activity; F:iron ion binding; F:oxidoreductase activity, acting on paired donors, with incorporation or reduction of molecular oxygen; F:heme binding; C:integral component of membrane	EC:1; EC:1.14	Oxidoreductases; Acting on paired donors, with incorporation or reduction of molecular oxygen. The oxygen incorporated need not be derived from O(2)
evm.model.Aet_chr_1.4678	Chr1	315235123	315236958	+	XM_020295862.2	transcription factor GHD7-like	870	20	9.73795e-157	75.82	2	P:GO:0009909; C:GO:0005634	P:regulation of flower development; C:nucleus	NA	NA
evm.model.Aet_chr_1.5197	Chr1	352137642	352139346	+	XM_020300288.2	gibberellin receptor GID1	1065	20	0.0	94.41	7	P:GO:0009939; P:GO:0010325; P:GO:0048444; F:GO:0010331; F:GO:0016787; C:GO:0005634; C:GO:0005737	P:positive regulation of gibberellic acid mediated signaling pathway; P:raffinose family oligosaccharide biosynthetic process; P:floral organ morphogenesis; F:gibberellin binding; F:hydrolase activity; C:nucleus; C:cytoplasm	EC:3	Hydrolases
evm.model.Aet_chr_1.5424	Chr1	368023004	368024767	-	XM_020344565.2	transcription factor	1290	20	0.0	79.19	2	P:GO:0006355; F:GO:0003677	P:regulation of transcription, DNA-templated; F:DNA binding	NA	NA
evm.model.Aet_chr_1.6147	Chr1	410134432	410137681	+	XM_020325852.2	ABSCISIC ACID-INSENSITIVE 5-like protein 2	987	20	0.0	88.53	4	P:GO:0009738; P:GO:0045893; F:GO:0003700; C:GO:0005634	P:abscisic acid-activated signaling pathway; P:positive regulation of transcription, DNA-templated; F:DNA-binding transcription factor activity; C:nucleus	NA	NA
evm.model.Aet_chr_1.6709	Chr1	433101601	433103302	+	XM_020313725.2	rac-like GTP-binding protein 2	639	20	3.45178e-152	97.4	15	P:GO:0007015; P:GO:0007163; P:GO:0007264; P:GO:0008360; P:GO:0030865; P:GO:0032956; F:GO:0003924; F:GO:0005525; F:GO:0019901; C:GO:0005634; C:GO:0005856; C:GO:0005886; C:GO:0005938; C:GO:0031410; C:GO:0042995	P:actin filament organization; P:establishment or maintenance of cell polarity; P:small GTPase mediated signal transduction; P:regulation of cell shape; P:cortical cytoskeleton organization; P:regulation of actin cytoskeleton organization; F:GTPase activity; F:GTP binding; F:protein kinase binding; C:nucleus; C:cytoskeleton; C:plasma membrane; C:cell cortex; C:cytoplasmic vesicle; C:cell projecti…	EC:3.6.1; EC:3.6; EC:3	Acting on acid anhydrides; Acting on acid anhydrides; Hydrolases
evm.model.Aet_chr_1.6721	Chr1	433598000	433599141	-	XM_020343630.2	Gibberellin 2-beta-dioxygenase	1032	20	0.0	90.15	4	P:GO:0009416; P:GO:0045487; F:GO:0046872; F:GO:0052634	P:response to light stimulus; P:gibberellin catabolic process; F:metal ion binding; F:C-19 gibberellin 2-beta-dioxygenase activity	EC:1.14.11; EC:1; EC:1.14; EC:1.14.11.13	Acting on paired donors, with incorporation or reduction of molecular oxygen. The oxygen incorporated need not be derived from O(2); Oxidoreductases; Acting on paired donors, with incorporation or reduction of molecular oxygen. The oxygen incorporated need not be derived from O(2); Gibberellin 2-beta-dioxygenase
evm.model.Aet_chr_1.6789	Chr1	437260674	437262119	-	XM_020306334.2	flowering locus T3 B1	540	20	1.75397e-123	94.96	NA	NA	NA	NA	NA
evm.model.Aet_chr_1.7012	Chr1	444926276	444928548	+	XM_020303413.2	alpha tubulin1	1356	20	0.0	99.5	7	P:GO:0000226; P:GO:0000278; F:GO:0003924; F:GO:0005200; F:GO:0005525; C:GO:0005737; C:GO:0005874	P:microtubule cytoskeleton organization; P:mitotic cell cycle; F:GTPase activity; F:structural constituent of cytoskeleton; F:GTP binding; C:cytoplasm; C:microtubule	EC:3.6.1; EC:3.6; EC:3	Acting on acid anhydrides; Acting on acid anhydrides; Hydrolases
evm.model.Aet_chr_1.7813	Chr1	474078953	474080399	-	XM_020341177.2	gibberellin 2-beta-dioxygenase-like	1074	20	0.0	87.73	4	P:GO:0009416; P:GO:0045487; F:GO:0046872; F:GO:0052634	P:response to light stimulus; P:gibberellin catabolic process; F:metal ion binding; F:C-19 gibberellin 2-beta-dioxygenase activity	EC:1.14.11; EC:1; EC:1.14; EC:1.14.11.13	Acting on paired donors, with incorporation or reduction of molecular oxygen. The oxygen incorporated need not be derived from O(2); Oxidoreductases; Acting on paired donors, with incorporation or reduction of molecular oxygen. The oxygen incorporated need not be derived from O(2); Gibberellin 2-beta-dioxygenase
evm.model.Aet_chr_1.8649	Chr1	498824021	498836411	-	XM_020326213.1	modifier of transcription 1-D1	6210	20	0.0	94.7	5	F:GO:0003677; F:GO:0005524; F:GO:0008094; F:GO:0070615; C:GO:0005634	F:DNA binding; F:ATP binding; F:ATPase, acting on DNA; F:nucleosome-dependent ATPase activity; C:nucleus	NA	NA
evm.model.Aet_chr_2.69	Chr2	1778073	1779506	+	XM_020310558.2	cytochrome P450 89A2-like	1434	20	0.0	72.79	5	F:GO:0004497; F:GO:0005506; F:GO:0016705; F:GO:0020037; C:GO:0016021	F:monooxygenase activity; F:iron ion binding; F:oxidoreductase activity, acting on paired donors, with incorporation or reduction of molecular oxygen; F:heme binding; C:integral component of membrane	EC:1; EC:1.14	Oxidoreductases; Acting on paired donors, with incorporation or reduction of molecular oxygen. The oxygen incorporated need not be derived from O(2)
evm.model.Aet_chr_2.150	Chr2	4349296	4350792	+	XM_020293034.2	cytochrome P450 76M5-like	1497	20	0.0	86.94	5	F:GO:0004497; F:GO:0005506; F:GO:0016705; F:GO:0020037; C:GO:0016021	F:monooxygenase activity; F:iron ion binding; F:oxidoreductase activity, acting on paired donors, with incorporation or reduction of molecular oxygen; F:heme binding; C:integral component of membrane	EC:1; EC:1.14	Oxidoreductases; Acting on paired donors, with incorporation or reduction of molecular oxygen. The oxygen incorporated need not be derived from O(2)
evm.model.Aet_chr_2.152	Chr2	4361322	4362961	+	XM_020293032.2	obtusifoliol 14-alpha demethylase-like	1500	20	0.0	89.53	10	P:GO:0016126; P:GO:0032259; F:GO:0004497; F:GO:0005506; F:GO:0008168; F:GO:0016705; F:GO:0020037; C:GO:0005783; C:GO:0005886; C:GO:0016021	P:sterol biosynthetic process; P:methylation; F:monooxygenase activity; F:iron ion binding; F:methyltransferase activity; F:oxidoreductase activity, acting on paired donors, with incorporation or reduction of molecular oxygen; F:heme binding; C:endoplasmic reticulum; C:plasma membrane; C:integral component of membrane	EC:2.1; EC:1; EC:1.14; EC:2; EC:2.1.1	Transferring one-carbon groups; Oxidoreductases; Acting on paired donors, with incorporation or reduction of molecular oxygen. The oxygen incorporated need not be derived from O(2); Transferases; Transferring one-carbon groups
evm.model.Aet_chr_2.245	Chr2	6292834	6293409	-	XM_020308149.1	dehydration-responsive element-binding protein 1C-like	576	20	2.33015e-84	77.82	4	P:GO:0006355; F:GO:0003677; F:GO:0003700; C:GO:0005634	P:regulation of transcription, DNA-templated; F:DNA binding; F:DNA-binding transcription factor activity; C:nucleus	NA	NA
evm.model.Aet_chr_2.513	Chr2	13246339	13249181	-	XM_020315285.1	obtusifoliol 14-alpha demethylase-like	1473	20	0.0	85.02	8	P:GO:0016126; F:GO:0004497; F:GO:0005506; F:GO:0016705; F:GO:0020037; C:GO:0005783; C:GO:0005886; C:GO:0016021	P:sterol biosynthetic process; F:monooxygenase activity; F:iron ion binding; F:oxidoreductase activity, acting on paired donors, with incorporation or reduction of molecular oxygen; F:heme binding; C:endoplasmic reticulum; C:plasma membrane; C:integral component of membrane	EC:1; EC:1.14	Oxidoreductases; Acting on paired donors, with incorporation or reduction of molecular oxygen. The oxygen incorporated need not be derived from O(2)
evm.model.Aet_chr_2.1172	Chr2	31461692	31463301	-	XM_020302874.2	obtusifoliol 14-alpha demethylase-like	1506	20	0.0	88.84	10	P:GO:0016126; P:GO:0032259; F:GO:0004497; F:GO:0005506; F:GO:0008168; F:GO:0016705; F:GO:0020037; C:GO:0005783; C:GO:0005886; C:GO:0016021	P:sterol biosynthetic process; P:methylation; F:monooxygenase activity; F:iron ion binding; F:methyltransferase activity; F:oxidoreductase activity, acting on paired donors, with incorporation or reduction of molecular oxygen; F:heme binding; C:endoplasmic reticulum; C:plasma membrane; C:integral component of membrane	EC:2.1; EC:1; EC:1.14; EC:2; EC:2.1.1	Transferring one-carbon groups; Oxidoreductases; Acting on paired donors, with incorporation or reduction of molecular oxygen. The oxygen incorporated need not be derived from O(2); Transferases; Transferring one-carbon groups
evm.model.Aet_chr_2.1351	Chr2	36474628	36478110	+	XM_020297132.1	phosphoinositide phospholipase C 2-like	1824	20	0.0	92.66	4	P:GO:0016042; P:GO:0048015; F:GO:0004435; C:GO:0005886	P:lipid catabolic process; P:phosphatidylinositol-mediated signaling; F:phosphatidylinositol phospholipase C activity; C:plasma membrane	EC:3.1.4; EC:3.1; EC:3; EC:3.1.4.11; EC:3.1.4.3; EC:3.1.1	Acting on ester bonds; Acting on ester bonds; Hydrolases; Phosphoinositide phospholipase C; Phospholipase C; Acting on ester bonds
evm.model.Aet_chr_2.1812	Chr2	57039468	57042085	+	XM_020330548.2	cytochrome P450 714B1	1557	20	0.0	84.17	5	F:GO:0004497; F:GO:0005506; F:GO:0016705; F:GO:0020037; C:GO:0016021	F:monooxygenase activity; F:iron ion binding; F:oxidoreductase activity, acting on paired donors, with incorporation or reduction of molecular oxygen; F:heme binding; C:integral component of membrane	EC:1; EC:1.14	Oxidoreductases; Acting on paired donors, with incorporation or reduction of molecular oxygen. The oxygen incorporated need not be derived from O(2)
evm.model.Aet_chr_2.3578	Chr2	165851341	165852901	+	XM_020341495.2	obtusifoliol 14-alpha demethylase-like	1491	20	0.0	90.31	10	P:GO:0016126; P:GO:0032259; F:GO:0004497; F:GO:0005506; F:GO:0008168; F:GO:0016705; F:GO:0020037; C:GO:0005783; C:GO:0005886; C:GO:0016021	P:sterol biosynthetic process; P:methylation; F:monooxygenase activity; F:iron ion binding; F:methyltransferase activity; F:oxidoreductase activity, acting on paired donors, with incorporation or reduction of molecular oxygen; F:heme binding; C:endoplasmic reticulum; C:plasma membrane; C:integral component of membrane	EC:2.1; EC:1; EC:1.14; EC:2; EC:2.1.1	Transferring one-carbon groups; Oxidoreductases; Acting on paired donors, with incorporation or reduction of molecular oxygen. The oxygen incorporated need not be derived from O(2); Transferases; Transferring one-carbon groups
evm.model.Aet_chr_2.5064	Chr2	317346593	317352914	+	XM_020293853.2	MADS-box transcription factor 15-like	816	20	2.86815e-134	92.54	5	P:GO:0045944; F:GO:0000978; F:GO:0000981; F:GO:0046983; C:GO:0005634	P:positive regulation of transcription by RNA polymerase II; F:RNA polymerase II cis-regulatory region sequence-specific DNA binding; F:DNA-binding transcription factor activity, RNA polymerase II-specific; F:protein dimerization activity; C:nucleus	NA	NA
evm.model.Aet_chr_2.5591	Chr2	371498726	371508679	-	XM_020303607.2	starch branching enzyme IIa	2460	20	0.0	99.24	7	P:GO:0005978; P:GO:0019252; F:GO:0003844; F:GO:0004553; F:GO:0043169; F:GO:0102752; C:GO:0009501	P:glycogen biosynthetic process; P:starch biosynthetic process; F:1,4-alpha-glucan branching enzyme activity; F:hydrolase activity, hydrolyzing O-glycosyl compounds; F:cation binding; F:1,4-alpha-glucan branching enzyme activity (using a glucosylated glycogenin as primer for glycogen synthesis); C:amyloplast	EC:3.2; EC:2.4.1.18; EC:2.4; EC:2; EC:3; EC:2.4.1; EC:3.2.1	Glycosylases; 1,4-alpha-glucan branching enzyme; Glycosyltransferases; Transferases; Hydrolases; Glycosyltransferases; Glycosylases
evm.model.Aet_chr_2.6192	Chr2	415881986	415883240	+	XM_020312824.2	NAC domain-containing protein 92-like	1062	20	0.0	79.03	2	P:GO:0006355; F:GO:0003677	P:regulation of transcription, DNA-templated; F:DNA binding	NA	NA
evm.model.Aet_chr_2.6211	Chr2	417440616	417442656	+	XM_020313382.2	14-3-3-like protein GF14-B	792	20	0.0	98.32	8	P:GO:0010468; F:GO:0003677; F:GO:0005509; F:GO:0005515; F:GO:0008426; F:GO:0044877; C:GO:0005634; C:GO:0005737	P:regulation of gene expression; F:DNA binding; F:calcium ion binding; F:protein binding; F:protein kinase C inhibitor activity; F:protein-containing complex binding; C:nucleus; C:cytoplasm	NA	NA
evm.model.Aet_chr_2.6564	Chr2	440180349	440182305	-	XM_020305579.2	protein FLOWERING LOCUS T-like	525	20	6.79371e-122	96.38	NA	NA	NA	NA	NA
evm.model.Aet_chr_2.7216	Chr2	484817064	484818369	+	XM_020300020.2	TPA_inf: caleosin	735	20	1.71006e-155	88.16	6	F:GO:0004497; F:GO:0005509; F:GO:1990137; C:GO:0005783; C:GO:0005811; C:GO:0016021	F:monooxygenase activity; F:calcium ion binding; F:plant seed peroxidase activity; C:endoplasmic reticulum; C:lipid droplet; C:integral component of membrane	EC:1.11; EC:1; EC:1.11.2.3	Acting on a peroxide as acceptor; Oxidoreductases; Plant seed peroxygenase
evm.model.Aet_chr_2.7422	Chr2	502255183	502256700	+	XM_020318703.2	carotenoid hydroxylase	912	20	0.0	89.52	7	P:GO:0008610; F:GO:0005506; F:GO:0009924; F:GO:0016491; F:GO:1990465; C:GO:0005789; C:GO:0016021	P:lipid biosynthetic process; F:iron ion binding; F:octadecanal decarbonylase activity; F:oxidoreductase activity; F:aldehyde oxygenase (deformylating) activity; C:endoplasmic reticulum membrane; C:integral component of membrane	EC:4.1.99.5; EC:4.1; EC:1; EC:4	Aldehyde oxygenase (deformylating); Carbon-carbon lyases; Oxidoreductases; Lyases
evm.model.Aet_chr_2.7468	Chr2	505755996	505756649	-	XM_020334083.2	dehydration-responsive element-binding protein 1E	654	20	5.68382e-119	83.42	4	P:GO:0006355; F:GO:0003677; F:GO:0003700; C:GO:0005634	P:regulation of transcription, DNA-templated; F:DNA binding; F:DNA-binding transcription factor activity; C:nucleus	NA	NA
evm.model.Aet_chr_2.7584	Chr2	516776721	516778310	+	XM_020300886.2	cytochrome P450 86A22	1590	20	0.0	95.53	5	F:GO:0004497; F:GO:0005506; F:GO:0016705; F:GO:0020037; C:GO:0016021	F:monooxygenase activity; F:iron ion binding; F:oxidoreductase activity, acting on paired donors, with incorporation or reduction of molecular oxygen; F:heme binding; C:integral component of membrane	EC:1; EC:1.14	Oxidoreductases; Acting on paired donors, with incorporation or reduction of molecular oxygen. The oxygen incorporated need not be derived from O(2)
evm.model.Aet_chr_2.8234	Chr2	548821842	548825125	+	XM_020296580.2	probable transcription factor FL	1179	20	0.0	90.06	8	P:GO:0006355; P:GO:0009909; P:GO:0010074; P:GO:0030154; P:GO:1905613; F:GO:0003677; F:GO:0005515; C:GO:0005634	P:regulation of transcription, DNA-templated; P:regulation of flower development; P:maintenance of meristem identity; P:cell differentiation; P:regulation of developmental vegetative growth; F:DNA binding; F:protein binding; C:nucleus	NA	NA
evm.model.Aet_chr_2.8318	Chr2	553001217	553002329	+	XM_020313654.1	myb-related protein Zm38-like	960	20	0.0	87.59	NA	NA	NA	NA	NA
evm.model.Aet_chr_2.8639	Chr2	566671768	566682950	-	XM_020340816.1	ABC transporter C family member 2-like	4890	20	0.0	97.61	6	P:GO:0055085; F:GO:0005524; F:GO:0042626; C:GO:0000325; C:GO:0005774; C:GO:0016021	P:transmembrane transport; F:ATP binding; F:ATPase-coupled transmembrane transporter activity; C:plant-type vacuole; C:vacuolar membrane; C:integral component of membrane	EC:7	Translocases
evm.model.Aet_chr_2.9114	Chr2	585726225	585727398	-	XM_020309663.2	WRKY45-like transcription factor	882	20	7.24322e-114	84.08	4	P:GO:0006355; F:GO:0003700; F:GO:0043565; C:GO:0005634	P:regulation of transcription, DNA-templated; F:DNA-binding transcription factor activity; F:sequence-specific DNA binding; C:nucleus	NA	NA
evm.model.Aet_chr_3.346	Chr3	7088595	7090235	+	XM_020335780.2	obtusifoliol 14-alpha demethylase-like	1527	20	0.0	92.05	10	P:GO:0016126; P:GO:0032259; F:GO:0004497; F:GO:0005506; F:GO:0008168; F:GO:0016705; F:GO:0020037; C:GO:0005783; C:GO:0005886; C:GO:0016021	P:sterol biosynthetic process; P:methylation; F:monooxygenase activity; F:iron ion binding; F:methyltransferase activity; F:oxidoreductase activity, acting on paired donors, with incorporation or reduction of molecular oxygen; F:heme binding; C:endoplasmic reticulum; C:plasma membrane; C:integral component of membrane	EC:2.1; EC:1; EC:1.14; EC:2; EC:2.1.1	Transferring one-carbon groups; Oxidoreductases; Acting on paired donors, with incorporation or reduction of molecular oxygen. The oxygen incorporated need not be derived from O(2); Transferases; Transferring one-carbon groups
evm.model.Aet_chr_3.604	Chr3	13434750	13440155	+	XM_020309291.1	extended synaptotagmin-1	2475	20	0.0	94.82	3	P:GO:0006869; F:GO:0008289; C:GO:0005783	P:lipid transport; F:lipid binding; C:endoplasmic reticulum	NA	NA
evm.model.Aet_chr_3.924	Chr3	24770561	24771997	-	XM_020328393.2	14-3-3-like protein GF14-E isoform X1	789	20	0.0	98.6	2	C:GO:0005634; C:GO:0005737	C:nucleus; C:cytoplasm	NA	NA
evm.model.Aet_chr_3.925	Chr3	24772522	24773178	-	XM_020328401.1	F-box protein GID2	657	20	1.73794e-65	83.66	6	P:GO:0009740; P:GO:0010265; P:GO:0016567; P:GO:0031146; C:GO:0005634; C:GO:0019005	P:gibberellic acid mediated signaling pathway; P:SCF complex assembly; P:protein ubiquitination; P:SCF-dependent proteasomal ubiquitin-dependent protein catabolic process; C:nucleus; C:SCF ubiquitin ligase complex	NA	NA
evm.model.Aet_chr_3.1446	Chr3	43670056	43672189	-	XM_020299131.2	shikimate kinase family protein	822	20	0.0	94.49	5	P:GO:0009658; P:GO:0010027; P:GO:0016310; F:GO:0016301; C:GO:0009570	P:chloroplast organization; P:thylakoid membrane organization; P:phosphorylation; F:kinase activity; C:chloroplast stroma	EC:2.7; EC:2	Transferring phosphorus-containing groups; Transferases
evm.model.Aet_chr_3.1604	Chr3	49113519	49115159	-	NA	obtusifoliol 14-alpha demethylase-like	1476	20	0.0	82.43	10	P:GO:0016126; P:GO:0032259; F:GO:0004497; F:GO:0005506; F:GO:0008168; F:GO:0016705; F:GO:0020037; C:GO:0005783; C:GO:0005886; C:GO:0016021	P:sterol biosynthetic process; P:methylation; F:monooxygenase activity; F:iron ion binding; F:methyltransferase activity; F:oxidoreductase activity, acting on paired donors, with incorporation or reduction of molecular oxygen; F:heme binding; C:endoplasmic reticulum; C:plasma membrane; C:integral component of membrane	EC:2.1; EC:1; EC:1.14; EC:2; EC:2.1.1	Transferring one-carbon groups; Oxidoreductases; Acting on paired donors, with incorporation or reduction of molecular oxygen. The oxygen incorporated need not be derived from O(2); Transferases; Transferring one-carbon groups
evm.model.Aet_chr_3.1738	Chr3	54357061	54358598	-	AF303376.1	Dreb-like protein	837	20	0.0	97.31	4	P:GO:0045893; F:GO:0000976; F:GO:0003700; C:GO:0005634	P:positive regulation of transcription, DNA-templated; F:transcription cis-regulatory region binding; F:DNA-binding transcription factor activity; C:nucleus	NA	NA
evm.model.Aet_chr_3.2234	Chr3	84259842	84261350	+	XM_020327909.2	gibberellin 3-beta-dioxygenase 2-2	1113	20	0.0	90.63	4	P:GO:0009416; P:GO:0009686; F:GO:0016707; F:GO:0046872	P:response to light stimulus; P:gibberellin biosynthetic process; F:gibberellin 3-beta-dioxygenase activity; F:metal ion binding	EC:1.14.11.15; EC:1.14.11; EC:1; EC:1.14	Gibberellin 3-beta-dioxygenase; Acting on paired donors, with incorporation or reduction of molecular oxygen. The oxygen incorporated need not be derived from O(2); Oxidoreductases; Acting on paired donors, with incorporation or reduction of molecular oxygen. The oxygen incorporated need not be derived from O(2)
evm.model.Aet_chr_3.2615	Chr3	110015383	110018437	-	XM_020345000.2	protein RICE FLOWERING LOCUS T 1-like	543	20	5.00994e-112	97.04	3	P:GO:0009909; P:GO:0048573; F:GO:0008429	P:regulation of flower development; P:photoperiodism, flowering; F:phosphatidylethanolamine binding	NA	NA
evm.model.Aet_chr_3.2637	Chr3	112569310	112572752	-	XM_020297913.2	GDSL esterase/lipase At5g45910-like	1119	20	0.0	93.46	1	F:GO:0016788	F:hydrolase activity, acting on ester bonds	EC:3.1; EC:3	Acting on ester bonds; Hydrolases
evm.model.Aet_chr_3.2670	Chr3	115872079	115873611	+	XM_020315987.2	cytochrome P450 710A1	1533	20	0.0	93.21	6	P:GO:0016125; F:GO:0004497; F:GO:0005506; F:GO:0016705; F:GO:0020037; C:GO:0016021	P:sterol metabolic process; F:monooxygenase activity; F:iron ion binding; F:oxidoreductase activity, acting on paired donors, with incorporation or reduction of molecular oxygen; F:heme binding; C:integral component of membrane	EC:1; EC:1.14	Oxidoreductases; Acting on paired donors, with incorporation or reduction of molecular oxygen. The oxygen incorporated need not be derived from O(2)
evm.model.Aet_chr_3.4435	Chr3	291229069	291232806	+	XM_020297682.2	lycopene epsilon cyclase, chloroplastic	1611	20	0.0	92.08	5	P:GO:0006744; P:GO:0016120; P:GO:0016123; F:GO:0016705; C:GO:0016021	P:ubiquinone biosynthetic process; P:carotene biosynthetic process; P:xanthophyll biosynthetic process; F:oxidoreductase activity, acting on paired donors, with incorporation or reduction of molecular oxygen; C:integral component of membrane	EC:1; EC:1.14	Oxidoreductases; Acting on paired donors, with incorporation or reduction of molecular oxygen. The oxygen incorporated need not be derived from O(2)
evm.model.Aet_chr_3.4436	Chr3	291233279	291236067	+	XM_020297586.2	Protein kinase protein with adenine nucleotide alpha hydrolase-like domain	2223	20	0.0	87.82	4	P:GO:0006468; F:GO:0004672; F:GO:0005524; F:GO:0016787	P:protein phosphorylation; F:protein kinase activity; F:ATP binding; F:hydrolase activity	EC:2.7.1; EC:2.7; EC:2; EC:3	Transferring phosphorus-containing groups; Transferring phosphorus-containing groups; Transferases; Hydrolases
evm.model.Aet_chr_3.4723	Chr3	321465727	321466359	+	XM_020321571.2	Late embryogenesis abundant protein Lea14-A	579	20	7.6245e-129	88.05	2	P:GO:0009269; C:GO:0005829	P:response to desiccation; C:cytosol	NA	NA
evm.model.Aet_chr_3.5803	Chr3	412333952	412335765	-	XM_020324116.2	gibberellin 2-oxidase	981	20	0.0	96.05	4	P:GO:0009416; P:GO:0045487; F:GO:0046872; F:GO:0052634	P:response to light stimulus; P:gibberellin catabolic process; F:metal ion binding; F:C-19 gibberellin 2-beta-dioxygenase activity	EC:1.14.11; EC:1; EC:1.14; EC:1.14.11.13	Acting on paired donors, with incorporation or reduction of molecular oxygen. The oxygen incorporated need not be derived from O(2); Oxidoreductases; Acting on paired donors, with incorporation or reduction of molecular oxygen. The oxygen incorporated need not be derived from O(2); Gibberellin 2-beta-dioxygenase
evm.model.Aet_chr_3.5937	Chr3	425701713	425704532	+	XM_020320497.2	BTB/POZ domain and ankyrin repeat-containing protein NPR2	1824	20	0.0	92.52	7	P:GO:0009862; P:GO:0042742; P:GO:0050832; P:GO:2000022; P:GO:2000031; F:GO:0005515; C:GO:0005634	P:systemic acquired resistance, salicylic acid mediated signaling pathway; P:defense response to bacterium; P:defense response to fungus; P:regulation of jasmonic acid mediated signaling pathway; P:regulation of salicylic acid mediated signaling pathway; F:protein binding; C:nucleus	NA	NA
evm.model.Aet_chr_3.6934	Chr3	487873373	487874932	+	XM_040404458.1	protein ABSCISIC ACID-INSENSITIVE 5-like	1194	20	0.0	88.44	4	P:GO:0009738; P:GO:0045893; F:GO:0003700; C:GO:0005634	P:abscisic acid-activated signaling pathway; P:positive regulation of transcription, DNA-templated; F:DNA-binding transcription factor activity; C:nucleus	NA	NA
evm.model.Aet_chr_3.6936	Chr3	488052633	488059778	-	XM_020334602.2	transcription factor LG2 isoform X1	1734	20	0.0	93.15	3	P:GO:0045893; F:GO:0003700; F:GO:0043565	P:positive regulation of transcription, DNA-templated; F:DNA-binding transcription factor activity; F:sequence-specific DNA binding	NA	NA
evm.model.Aet_chr_3.7348	Chr3	513506665	513507636	-	XM_020316947.2	dehydrin 10	828	6	8.21241e-39	89.91	4	P:GO:0009414; P:GO:0009631; P:GO:0009737; C:GO:0005829	P:response to water deprivation; P:cold acclimation; P:response to abscisic acid; C:cytosol	NA	NA
evm.model.Aet_chr_3.7404	Chr3	516895191	516896831	+	XM_020300942.2	gibberellin 20 oxidase 1-B	1071	20	0.0	82.31	8	P:GO:0006952; P:GO:0009416; P:GO:0009686; P:GO:0009826; P:GO:0009908; P:GO:0040008; F:GO:0045544; F:GO:0046872	P:defense response; P:response to light stimulus; P:gibberellin biosynthetic process; P:unidimensional cell growth; P:flower development; P:regulation of growth; F:gibberellin 20-oxidase activity; F:metal ion binding	EC:1.14.11; EC:1; EC:1.14	Acting on paired donors, with incorporation or reduction of molecular oxygen. The oxygen incorporated need not be derived from O(2); Oxidoreductases; Acting on paired donors, with incorporation or reduction of molecular oxygen. The oxygen incorporated need not be derived from O(2)
evm.model.Aet_chr_3.7538	Chr3	524544765	524547779	-	XM_020332363.2	Gibberellin 20 oxidase 2	1254	20	0.0	91.23	7	P:GO:0009413; P:GO:0009416; P:GO:0009686; P:GO:0009826; P:GO:0009908; F:GO:0045544; F:GO:0046872	P:response to flooding; P:response to light stimulus; P:gibberellin biosynthetic process; P:unidimensional cell growth; P:flower development; F:gibberellin 20-oxidase activity; F:metal ion binding	EC:1.14.11; EC:1; EC:1.14	Acting on paired donors, with incorporation or reduction of molecular oxygen. The oxygen incorporated need not be derived from O(2); Oxidoreductases; Acting on paired donors, with incorporation or reduction of molecular oxygen. The oxygen incorporated need not be derived from O(2)
evm.model.Aet_chr_4.240	Chr4	6763882	6766833	-	XM_020325486.2	BTB/POZ domain and ankyrin repeat-containing protein NPR3	1791	20	0.0	90.57	7	P:GO:0009862; P:GO:0042742; P:GO:0050832; P:GO:2000022; P:GO:2000031; F:GO:0005515; C:GO:0005634	P:systemic acquired resistance, salicylic acid mediated signaling pathway; P:defense response to bacterium; P:defense response to fungus; P:regulation of jasmonic acid mediated signaling pathway; P:regulation of salicylic acid mediated signaling pathway; F:protein binding; C:nucleus	NA	NA
evm.model.Aet_chr_4.241	Chr4	6791503	6793428	+	XM_020325520.2	fe(2+) transport protein 1-like	1110	20	0.0	88.36	6	P:GO:0006826; P:GO:0015691; P:GO:0071577; F:GO:0005385; C:GO:0005886; C:GO:0016021	P:iron ion transport; P:cadmium ion transport; P:zinc ion transmembrane transport; F:zinc ion transmembrane transporter activity; C:plasma membrane; C:integral component of membrane	EC:7	Translocases
evm.model.Aet_chr_4.243	Chr4	6820467	6825454	+	XM_020325500.2	guanine nucleotide-binding protein subunit beta	1143	20	0.0	98.18	20	P:GO:0006508; P:GO:0007186; P:GO:0009723; P:GO:0009845; P:GO:0009867; P:GO:0009991; P:GO:0010118; P:GO:0010154; P:GO:0030968; P:GO:0048527; P:GO:0050832; P:GO:0072593; P:GO:1905392; P:GO:2000280; F:GO:0008237; F:GO:0008270; F:GO:0031682; C:GO:0005783; C:GO:0005834; C:GO:0080008	P:proteolysis; P:G protein-coupled receptor signaling pathway; P:response to ethylene; P:seed germination; P:jasmonic acid mediated signaling pathway; P:response to extracellular stimulus; P:stomatal movement; P:fruit development; P:endoplasmic reticulum unfolded protein response; P:lateral root development; P:defense response to fungus; P:reactive oxygen species metabolic process; P:plant organ …	EC:3.4; EC:3	Acting on peptide bonds (peptidases); Hydrolases
evm.model.Aet_chr_4.627	Chr4	20537577	20539448	+	XM_020292221.2	DELLA protein	1872	20	0.0	97.27	6	P:GO:0006355; P:GO:0009740; F:GO:0003700; F:GO:0003712; F:GO:0043565; C:GO:0005634	P:regulation of transcription, DNA-templated; P:gibberellic acid mediated signaling pathway; F:DNA-binding transcription factor activity; F:transcription coregulator activity; F:sequence-specific DNA binding; C:nucleus	NA	NA
evm.model.Aet_chr_4.738	Chr4	23710098	23711661	-	XM_020300998.2	14-3-3-like protein A	786	20	0.0	97.91	6	P:GO:0000077; P:GO:0006588; F:GO:0004623; F:GO:0008426; C:GO:0005634; C:GO:0005737	P:DNA damage checkpoint signaling; P:activation of tryptophan 5-monooxygenase activity; F:phospholipase A2 activity; F:protein kinase C inhibitor activity; C:nucleus; C:cytoplasm	EC:3.1; EC:3; EC:3.1.1; EC:3.1.1.1; EC:3.1.1.4	Acting on ester bonds; Hydrolases; Acting on ester bonds; Carboxylesterase; Phospholipase A(2)
evm.model.Aet_chr_4.920	Chr4	34630482	34632918	+	XM_020292005.2	tubulin alpha-1 chain	1356	20	0.0	99.79	7	P:GO:0000226; P:GO:0000278; F:GO:0003924; F:GO:0005200; F:GO:0005525; C:GO:0005737; C:GO:0005874	P:microtubule cytoskeleton organization; P:mitotic cell cycle; F:GTPase activity; F:structural constituent of cytoskeleton; F:GTP binding; C:cytoplasm; C:microtubule	EC:3.6.1; EC:3.6; EC:3	Acting on acid anhydrides; Acting on acid anhydrides; Hydrolases
evm.model.Aet_chr_4.1557	Chr4	71174731	71184639	+	XM_020318037.2	ATP-dependent DNA helicase MPH1	4236	20	0.0	82.24	9	P:GO:0032508; P:GO:0036297; P:GO:0045003; P:GO:0071932; F:GO:0000400; F:GO:0005524; F:GO:0009378; F:GO:0016787; F:GO:0043138	P:DNA duplex unwinding; P:interstrand cross-link repair; P:double-strand break repair via synthesis-dependent strand annealing; P:replication fork reversal; F:four-way junction DNA binding; F:ATP binding; F:four-way junction helicase activity; F:hydrolase activity; F:3'-5' DNA helicase activity	EC:3.6.4.12; EC:3	DNA helicase; Hydrolases
evm.model.Aet_chr_4.2049	Chr4	105629119	105633051	+	XM_020318809.2	obtusifoliol 14-alpha demethylase	1473	20	0.0	97.26	11	P:GO:0016126; P:GO:0032259; F:GO:0004497; F:GO:0005506; F:GO:0008168; F:GO:0016705; F:GO:0020037; C:GO:0005783; C:GO:0005794; C:GO:0005886; C:GO:0016021	P:sterol biosynthetic process; P:methylation; F:monooxygenase activity; F:iron ion binding; F:methyltransferase activity; F:oxidoreductase activity, acting on paired donors, with incorporation or reduction of molecular oxygen; F:heme binding; C:endoplasmic reticulum; C:Golgi apparatus; C:plasma membrane; C:integral component of membrane	EC:2.1; EC:1; EC:1.14; EC:2; EC:2.1.1	Transferring one-carbon groups; Oxidoreductases; Acting on paired donors, with incorporation or reduction of molecular oxygen. The oxygen incorporated need not be derived from O(2); Transferases; Transferring one-carbon groups
evm.model.Aet_chr_4.2763	Chr4	189558686	189561379	-	XM_040386982.1	14-3-3-like protein GF14-D	801	20	0.0	97.05	1	F:GO:0005515	F:protein binding	NA	NA
evm.model.Aet_chr_4.3803	Chr4	316538158	316540206	+	XM_020342494.2	ABSCISIC ACID-INSENSITIVE 5-like protein 2	672	20	8.06707e-158	77.29	4	P:GO:0009738; P:GO:0045893; F:GO:0003700; C:GO:0005634	P:abscisic acid-activated signaling pathway; P:positive regulation of transcription, DNA-templated; F:DNA-binding transcription factor activity; C:nucleus	NA	NA
evm.model.Aet_chr_4.3923	Chr4	327740892	327748357	-	XM_020328926.2	Phytochrome B	3495	20	0.0	96.83	10	P:GO:0000160; P:GO:0006355; P:GO:0009584; P:GO:0009585; P:GO:0017006; P:GO:0018298; F:GO:0000155; F:GO:0009881; F:GO:0042803; C:GO:0005634	P:phosphorelay signal transduction system; P:regulation of transcription, DNA-templated; P:detection of visible light; P:red, far-red light phototransduction; P:protein-tetrapyrrole linkage; P:protein-chromophore linkage; F:phosphorelay sensor kinase activity; F:photoreceptor activity; F:protein homodimerization activity; C:nucleus	EC:2.7.1; EC:2.7; EC:2.7.3; EC:2; EC:2.7.13.3	Transferring phosphorus-containing groups; Transferring phosphorus-containing groups; Transferring phosphorus-containing groups; Transferases; Histidine kinase
evm.model.Aet_chr_4.4785	Chr4	403910162	403916004	+	XM_020301386.2	cytochrome P450 90B2	1518	20	0.0	96.42	15	P:GO:0009741; P:GO:0009826; P:GO:0009867; P:GO:0010268; P:GO:0010358; P:GO:0016125; P:GO:0016132; F:GO:0005506; F:GO:0010012; F:GO:0016705; F:GO:0020037; F:GO:0080132; C:GO:0005783; C:GO:0005886; C:GO:0016021	P:response to brassinosteroid; P:unidimensional cell growth; P:jasmonic acid mediated signaling pathway; P:brassinosteroid homeostasis; P:leaf shaping; P:sterol metabolic process; P:brassinosteroid biosynthetic process; F:iron ion binding; F:steroid 22-alpha hydroxylase activity; F:oxidoreductase activity, acting on paired donors, with incorporation or reduction of molecular oxygen; F:heme bindin…	EC:1; EC:1.14	Oxidoreductases; Acting on paired donors, with incorporation or reduction of molecular oxygen. The oxygen incorporated need not be derived from O(2)
evm.model.Aet_chr_4.5075	Chr4	426745027	426749127	+	XM_020330849.2	probable protein S-acyltransferase 22	1761	20	0.0	88.36	6	P:GO:0006612; P:GO:0018230; F:GO:0019706; C:GO:0005783; C:GO:0005794; C:GO:0016021	P:protein targeting to membrane; P:peptidyl-L-cysteine S-palmitoylation; F:protein-cysteine S-palmitoyltransferase activity; C:endoplasmic reticulum; C:Golgi apparatus; C:integral component of membrane	EC:2.3; EC:2; EC:2.3.1.225; EC:2.3.1	Acyltransferases; Transferases; Protein S-acyltransferase; Acyltransferases
evm.model.Aet_chr_4.5503	Chr4	454811476	454814520	+	XM_020326273.2	zinc transporter 9-like	1050	20	0.0	89.65	4	P:GO:0071577; F:GO:0005385; C:GO:0005886; C:GO:0016021	P:zinc ion transmembrane transport; F:zinc ion transmembrane transporter activity; C:plasma membrane; C:integral component of membrane	EC:7	Translocases
evm.model.Aet_chr_4.6093	Chr4	486516833	486518399	-	XM_020342157.2	beta-carotene 3-hydroxylase, chloroplastic	894	20	7.51376e-138	96.43	9	P:GO:0016119; P:GO:0016123; F:GO:0005506; F:GO:0009924; F:GO:0016491; F:GO:1990465; C:GO:0005789; C:GO:0009507; C:GO:0016021	P:carotene metabolic process; P:xanthophyll biosynthetic process; F:iron ion binding; F:octadecanal decarbonylase activity; F:oxidoreductase activity; F:aldehyde oxygenase (deformylating) activity; C:endoplasmic reticulum membrane; C:chloroplast; C:integral component of membrane	EC:4.1.99.5; EC:4.1; EC:1; EC:4	Aldehyde oxygenase (deformylating); Carbon-carbon lyases; Oxidoreductases; Lyases
evm.model.Aet_chr_4.6391	Chr4	495940676	495942792	+	XM_020342328.1	cyclin-dependent kinase inhibitor 5-like	654	20	3.51276e-108	70.03	3	P:GO:0045736; F:GO:0004861; C:GO:0005634	P:negative regulation of cyclin-dependent protein serine/threonine kinase activity; F:cyclin-dependent protein serine/threonine kinase inhibitor activity; C:nucleus	EC:2.7.1	Transferring phosphorus-containing groups
evm.model.Aet_chr_4.6789	Chr4	510868686	510870616	-	XM_020331498.2	obtusifoliol 14-alpha demethylase-like	1467	20	0.0	85.34	11	P:GO:0016126; P:GO:0032259; F:GO:0004497; F:GO:0005506; F:GO:0005525; F:GO:0008168; F:GO:0016705; F:GO:0020037; C:GO:0005783; C:GO:0005886; C:GO:0016021	P:sterol biosynthetic process; P:methylation; F:monooxygenase activity; F:iron ion binding; F:GTP binding; F:methyltransferase activity; F:oxidoreductase activity, acting on paired donors, with incorporation or reduction of molecular oxygen; F:heme binding; C:endoplasmic reticulum; C:plasma membrane; C:integral component of membrane	EC:2.1; EC:1; EC:1.14; EC:2; EC:2.1.1	Transferring one-carbon groups; Oxidoreductases; Acting on paired donors, with incorporation or reduction of molecular oxygen. The oxygen incorporated need not be derived from O(2); Transferases; Transferring one-carbon groups
evm.model.Aet_chr_4.6955	Chr4	515801108	515802917	-	XM_020342430.2	zinc finger-CTT domain transcription factor a	642	20	9.99666e-95	87.51	1	C:GO:0005634	C:nucleus	NA	NA
evm.model.Aet_chr_4.6956	Chr4	515885514	515887537	-	XM_020341357.2	ZCCT1	633	20	1.95751e-92	84.09	1	C:GO:0005634	C:nucleus	NA	NA
evm.model.Aet_chr_4.7311	Chr4	524777197	524779852	-	XM_020305264.2	obtusifoliol 14-alpha demethylase-like	1488	20	0.0	79.25	8	P:GO:0016126; F:GO:0004497; F:GO:0005506; F:GO:0016705; F:GO:0020037; C:GO:0005783; C:GO:0005886; C:GO:0016021	P:sterol biosynthetic process; F:monooxygenase activity; F:iron ion binding; F:oxidoreductase activity, acting on paired donors, with incorporation or reduction of molecular oxygen; F:heme binding; C:endoplasmic reticulum; C:plasma membrane; C:integral component of membrane	EC:1; EC:1.14	Oxidoreductases; Acting on paired donors, with incorporation or reduction of molecular oxygen. The oxygen incorporated need not be derived from O(2)
evm.model.Aet_chr_5.33	Chr5	2377775	2383415	+	XM_020316329.2	carotenoid 9,10(9',10')-cleavage dioxygenase	1650	20	0.0	97.29	4	P:GO:0016121; F:GO:0010436; F:GO:0046872; C:GO:0009570	P:carotene catabolic process; F:carotenoid dioxygenase activity; F:metal ion binding; C:chloroplast stroma	EC:1.13.11; EC:1.13; EC:1	Acting on single donors with incorporation of molecular oxygen (oxygenases). The oxygen incorporated need not be derived from O(2); Acting on single donors with incorporation of molecular oxygen (oxygenases). The oxygen incorporated need not be derived from O(2); Oxidoreductases
evm.model.Aet_chr_5.89	Chr5	4816074	4817756	+	XM_020305010.1	Obtusifoliol 14-alpha demethylase	1494	20	0.0	86.64	10	P:GO:0016126; P:GO:0032259; F:GO:0004497; F:GO:0005506; F:GO:0008168; F:GO:0016705; F:GO:0020037; C:GO:0005783; C:GO:0005886; C:GO:0016021	P:sterol biosynthetic process; P:methylation; F:monooxygenase activity; F:iron ion binding; F:methyltransferase activity; F:oxidoreductase activity, acting on paired donors, with incorporation or reduction of molecular oxygen; F:heme binding; C:endoplasmic reticulum; C:plasma membrane; C:integral component of membrane	EC:2.1; EC:1; EC:1.14; EC:2; EC:2.1.1	Transferring one-carbon groups; Oxidoreductases; Acting on paired donors, with incorporation or reduction of molecular oxygen. The oxygen incorporated need not be derived from O(2); Transferases; Transferring one-carbon groups
evm.model.Aet_chr_5.92	Chr5	4842914	4844994	-	XM_020310743.2	obtusifoliol 14-alpha demethylase	1476	20	0.0	82.39	8	P:GO:0016126; F:GO:0004497; F:GO:0005506; F:GO:0016705; F:GO:0020037; C:GO:0005783; C:GO:0005886; C:GO:0016021	P:sterol biosynthetic process; F:monooxygenase activity; F:iron ion binding; F:oxidoreductase activity, acting on paired donors, with incorporation or reduction of molecular oxygen; F:heme binding; C:endoplasmic reticulum; C:plasma membrane; C:integral component of membrane	EC:1; EC:1.14	Oxidoreductases; Acting on paired donors, with incorporation or reduction of molecular oxygen. The oxygen incorporated need not be derived from O(2)
evm.model.Aet_chr_5.198	Chr5	8307379	8309157	+	XM_020312115.2	P450	1587	20	0.0	96.59	4	F:GO:0005506; F:GO:0016709; F:GO:0020037; C:GO:0016021	F:iron ion binding; F:oxidoreductase activity, acting on paired donors, with incorporation or reduction of molecular oxygen, NAD(P)H as one donor, and incorporation of one atom of oxygen; F:heme binding; C:integral component of membrane	EC:1; EC:1.14; EC:1.14.13	Oxidoreductases; Acting on paired donors, with incorporation or reduction of molecular oxygen. The oxygen incorporated need not be derived from O(2); Acting on paired donors, with incorporation or reduction of molecular oxygen. The oxygen incorporated need not be derived from O(2)
evm.model.Aet_chr_5.1990	Chr5	114011362	114013030	+	XM_020306791.2	transcription factor JAMYB-like	837	20	0.0	80.82	4	P:GO:0006355; F:GO:0003700; F:GO:0043565; C:GO:0005634	P:regulation of transcription, DNA-templated; F:DNA-binding transcription factor activity; F:sequence-specific DNA binding; C:nucleus	NA	NA
evm.model.Aet_chr_5.3414	Chr5	255953560	255958205	+	XM_020315799.2	phosphoinositide phospholipase C 6-like	1770	20	0.0	92.41	4	P:GO:0016042; P:GO:0048015; F:GO:0004435; C:GO:0005886	P:lipid catabolic process; P:phosphatidylinositol-mediated signaling; F:phosphatidylinositol phospholipase C activity; C:plasma membrane	EC:3.1.4; EC:3.1; EC:3; EC:3.1.4.11; EC:3.1.4.3; EC:3.1.1	Acting on ester bonds; Acting on ester bonds; Hydrolases; Phosphoinositide phospholipase C; Phospholipase C; Acting on ester bonds
evm.model.Aet_chr_5.5192	Chr5	377369972	377373187	-	XM_020344723.2	heat shock protein 90	2103	20	0.0	98.48	9	P:GO:0006457; P:GO:0034605; P:GO:0050821; F:GO:0005524; F:GO:0051082; C:GO:0005829; C:GO:0005886; C:GO:0032991; C:GO:0048471	P:protein folding; P:cellular response to heat; P:protein stabilization; F:ATP binding; F:unfolded protein binding; C:cytosol; C:plasma membrane; C:protein-containing complex; C:perinuclear region of cytoplasm	NA	NA
evm.model.Aet_chr_5.5223	Chr5	378511346	378512797	+	XM_020309906.2	cytochrome P450 716B1-like	1305	20	0.0	92.66	6	P:GO:0016125; F:GO:0004497; F:GO:0005506; F:GO:0016705; F:GO:0020037; C:GO:0016021	P:sterol metabolic process; F:monooxygenase activity; F:iron ion binding; F:oxidoreductase activity, acting on paired donors, with incorporation or reduction of molecular oxygen; F:heme binding; C:integral component of membrane	EC:1; EC:1.14	Oxidoreductases; Acting on paired donors, with incorporation or reduction of molecular oxygen. The oxygen incorporated need not be derived from O(2)
evm.model.Aet_chr_5.6122	Chr5	417651693	417652373	-	XM_020312158.2	dehydration-responsive element-binding protein 1B-like	681	20	1.52706e-126	92.7	4	P:GO:0006355; F:GO:0003677; F:GO:0003700; C:GO:0005634	P:regulation of transcription, DNA-templated; F:DNA binding; F:DNA-binding transcription factor activity; C:nucleus	NA	NA
evm.model.Aet_chr_5.6140	Chr5	418779534	418780229	-	XM_020325977.2	C-repeat binding factor 6	696	20	5.91838e-95	85.49	4	P:GO:0006355; F:GO:0003677; F:GO:0003700; C:GO:0005634	P:regulation of transcription, DNA-templated; F:DNA binding; F:DNA-binding transcription factor activity; C:nucleus	NA	NA
evm.model.Aet_chr_5.7070	Chr5	451864650	451865849	+	XM_020312948.2	Hydrophobic protein OSR8	216	20	1.54974e-27	90.36	1	C:GO:0016021	C:integral component of membrane	NA	NA
evm.model.Aet_chr_5.7261	Chr5	457606625	457607153	+	XM_020300071.2	dehydrin 1	432	20	1.47873e-21	79.34	4	P:GO:0009414; P:GO:0009631; P:GO:0009737; C:GO:0005829	P:response to water deprivation; P:cold acclimation; P:response to abscisic acid; C:cytosol	NA	NA
evm.model.Aet_chr_5.7262	Chr5	457612623	457613113	+	XM_020300076.2	dehydrin 1	402	20	3.40242e-54	83.39	4	P:GO:0009414; P:GO:0009631; P:GO:0009737; C:GO:0005829	P:response to water deprivation; P:cold acclimation; P:response to abscisic acid; C:cytosol	NA	NA
evm.model.Aet_chr_5.7514	Chr5	471128447	471129122	-	XM_020337527.2	late embryogenesis abundant protein 3	558	20	1.68613e-82	72.52	NA	NA	NA	NA	NA
evm.model.Aet_chr_5.7599	Chr5	474117244	474121445	+	XM_020303005.2	phytochrome C	3420	20	0.0	98.83	10	P:GO:0000160; P:GO:0006355; P:GO:0009584; P:GO:0009585; P:GO:0017006; P:GO:0018298; F:GO:0000155; F:GO:0009881; F:GO:0042803; C:GO:0005634	P:phosphorelay signal transduction system; P:regulation of transcription, DNA-templated; P:detection of visible light; P:red, far-red light phototransduction; P:protein-tetrapyrrole linkage; P:protein-chromophore linkage; F:phosphorelay sensor kinase activity; F:photoreceptor activity; F:protein homodimerization activity; C:nucleus	EC:2.7.1; EC:2.7; EC:2.7.3; EC:2; EC:2.7.13.3	Transferring phosphorus-containing groups; Transferring phosphorus-containing groups; Transferring phosphorus-containing groups; Transferases; Histidine kinase
evm.model.Aet_chr_5.7613	Chr5	474983280	474994718	-	XM_020342432.2	VRN-A1	735	20	1.35095e-116	96.19	5	P:GO:0045944; F:GO:0000978; F:GO:0000981; F:GO:0046983; C:GO:0005634	P:positive regulation of transcription by RNA polymerase II; F:RNA polymerase II cis-regulatory region sequence-specific DNA binding; F:DNA-binding transcription factor activity, RNA polymerase II-specific; F:protein dimerization activity; C:nucleus	NA	NA
evm.model.Aet_chr_5.7616	Chr5	475219475	475225708	-	XM_020344824.2	MADS-box transcription factor 34	711	20	4.6839e-166	90.69	5	P:GO:0045944; F:GO:0000978; F:GO:0000981; F:GO:0046983; C:GO:0005634	P:positive regulation of transcription by RNA polymerase II; F:RNA polymerase II cis-regulatory region sequence-specific DNA binding; F:DNA-binding transcription factor activity, RNA polymerase II-specific; F:protein dimerization activity; C:nucleus	NA	NA
evm.model.Aet_chr_5.7866	Chr5	488405376	488407530	+	XM_020309759.2	Tubulin alpha chain	1356	20	0.0	99.02	7	P:GO:0000226; P:GO:0000278; F:GO:0003924; F:GO:0005200; F:GO:0005525; C:GO:0005737; C:GO:0005874	P:microtubule cytoskeleton organization; P:mitotic cell cycle; F:GTPase activity; F:structural constituent of cytoskeleton; F:GTP binding; C:cytoplasm; C:microtubule	EC:3.6.1; EC:3.6; EC:3	Acting on acid anhydrides; Acting on acid anhydrides; Hydrolases
evm.model.Aet_chr_6.226	Chr6	5249978	5256704	+	XM_020297718.2	MIKC-type MADS-box transcription factor AGL1	780	20	2.62682e-96	88.13	5	P:GO:0045944; F:GO:0000978; F:GO:0000981; F:GO:0046983; C:GO:0005634	P:positive regulation of transcription by RNA polymerase II; F:RNA polymerase II cis-regulatory region sequence-specific DNA binding; F:DNA-binding transcription factor activity, RNA polymerase II-specific; F:protein dimerization activity; C:nucleus	NA	NA
evm.model.Aet_chr_6.1203	Chr6	34935488	34936080	-	XM_020333786.2	dehydrin Rab15-like	450	20	3.20658e-41	69.07	1	P:GO:0009415	P:response to water	NA	NA
evm.model.Aet_chr_6.2166	Chr6	84389064	84394214	+	XM_020321987.2	guanine nucleotide-binding protein subunit gamma 2-like	444	20	1.02412e-45	93.35	3	P:GO:0007186; F:GO:0005515; C:GO:0005886	P:G protein-coupled receptor signaling pathway; F:protein binding; C:plasma membrane	NA	NA
evm.model.Aet_chr_6.3163	Chr6	146976561	146979198	+	XM_020321231.2	probable peroxygenase 4	660	20	1.1708e-143	85.76	2	F:GO:0004497; F:GO:0005509	F:monooxygenase activity; F:calcium ion binding	EC:1	Oxidoreductases
evm.model.Aet_chr_6.3232	Chr6	150599461	150600514	-	XM_020338236.2	protein FLOWERING LOCUS T-like	552	20	1.04857e-127	89.3	NA	NA	NA	NA	NA
evm.model.Aet_chr_6.3606	Chr6	183267447	183268922	+	XM_020334027.2	Allene oxide synthase 4	1476	20	0.0	85.91	9	P:GO:0006633; P:GO:0016125; P:GO:0031408; F:GO:0004497; F:GO:0005506; F:GO:0009978; F:GO:0016705; F:GO:0020037; F:GO:0047987	P:fatty acid biosynthetic process; P:sterol metabolic process; P:oxylipin biosynthetic process; F:monooxygenase activity; F:iron ion binding; F:allene oxide synthase activity; F:oxidoreductase activity, acting on paired donors, with incorporation or reduction of molecular oxygen; F:heme binding; F:hydroperoxide dehydratase activity	EC:4.2.1; EC:4.2.1.92; EC:1; EC:4.2; EC:1.14; EC:4	Carbon-oxygen lyases; Hydroperoxide dehydratase; Oxidoreductases; Carbon-oxygen lyases; Acting on paired donors, with incorporation or reduction of molecular oxygen. The oxygen incorporated need not be derived from O(2); Lyases
evm.model.Aet_chr_6.3659	Chr6	187630501	187632226	-	XM_020327798.2	cytochrome P450 711A1	1635	20	0.0	86.46	5	F:GO:0004497; F:GO:0005506; F:GO:0016705; F:GO:0020037; C:GO:0016021	F:monooxygenase activity; F:iron ion binding; F:oxidoreductase activity, acting on paired donors, with incorporation or reduction of molecular oxygen; F:heme binding; C:integral component of membrane	EC:1; EC:1.14	Oxidoreductases; Acting on paired donors, with incorporation or reduction of molecular oxygen. The oxygen incorporated need not be derived from O(2)
evm.model.Aet_chr_6.4915	Chr6	325147822	325150531	-	XM_020305368.1	gibberellin 2-beta-dioxygenase 8-like	1044	20	0.0	89.89	2	F:GO:0046872; F:GO:0051213	F:metal ion binding; F:dioxygenase activity	EC:1	Oxidoreductases
evm.model.Aet_chr_6.5131	Chr6	341145643	341147268	+	XM_020299691.2	cytochrome P450 86A2	1626	20	0.0	94.81	5	F:GO:0004497; F:GO:0005506; F:GO:0016705; F:GO:0020037; C:GO:0016021	F:monooxygenase activity; F:iron ion binding; F:oxidoreductase activity, acting on paired donors, with incorporation or reduction of molecular oxygen; F:heme binding; C:integral component of membrane	EC:1; EC:1.14	Oxidoreductases; Acting on paired donors, with incorporation or reduction of molecular oxygen. The oxygen incorporated need not be derived from O(2)
evm.model.Aet_chr_6.5266	Chr6	351747738	351748629	-	XM_020333870.2	dehydrin WZY1-2	789	20	1.12925e-67	86.74	5	P:GO:0009414; P:GO:0009631; P:GO:0009737; C:GO:0005829; C:GO:0016020	P:response to water deprivation; P:cold acclimation; P:response to abscisic acid; C:cytosol; C:membrane	NA	NA
evm.model.Aet_chr_6.5317	Chr6	358133056	358136778	-	XM_020324149.2	Cytochrome P450 87A3	1422	20	0.0	95.2	9	P:GO:0007275; P:GO:0010268; P:GO:0016125; P:GO:0016132; F:GO:0004497; F:GO:0005506; F:GO:0016705; F:GO:0020037; C:GO:0016021	P:multicellular organism development; P:brassinosteroid homeostasis; P:sterol metabolic process; P:brassinosteroid biosynthetic process; F:monooxygenase activity; F:iron ion binding; F:oxidoreductase activity, acting on paired donors, with incorporation or reduction of molecular oxygen; F:heme binding; C:integral component of membrane	EC:1; EC:1.14	Oxidoreductases; Acting on paired donors, with incorporation or reduction of molecular oxygen. The oxygen incorporated need not be derived from O(2)
evm.model.Aet_chr_6.5562	Chr6	378275989	378277914	-	XM_020298305.2	abscisic acid 8'-hydroxylase 1	1437	20	0.0	95.45	7	P:GO:0016125; P:GO:0046345; F:GO:0005506; F:GO:0010295; F:GO:0020037; C:GO:0005789; C:GO:0016021	P:sterol metabolic process; P:abscisic acid catabolic process; F:iron ion binding; F:(+)-abscisic acid 8'-hydroxylase activity; F:heme binding; C:endoplasmic reticulum membrane; C:integral component of membrane	EC:1.14.14.137; EC:1; EC:1.14; EC:1.14.13	(+)-abscisic acid 8'-hydroxylase; Oxidoreductases; Acting on paired donors, with incorporation or reduction of molecular oxygen. The oxygen incorporated need not be derived from O(2); Acting on paired donors, with incorporation or reduction of molecular oxygen. The oxygen incorporated need not be derived from O(2)
evm.model.Aet_chr_6.6009	Chr6	408803823	408805536	+	XM_020314505.2	probable peroxygenase 5	666	20	6.72755e-118	85.71	3	F:GO:0004497; F:GO:0005509; C:GO:0016021	F:monooxygenase activity; F:calcium ion binding; C:integral component of membrane	EC:1	Oxidoreductases
evm.model.Aet_chr_6.6196	Chr6	421330986	421333643	+	XM_020329561.2	rac-like GTP-binding protein 3	642	20	5.62669e-142	96.82	15	P:GO:0007015; P:GO:0007163; P:GO:0007264; P:GO:0008360; P:GO:0030865; P:GO:0032956; F:GO:0003924; F:GO:0005525; F:GO:0019901; C:GO:0005634; C:GO:0005856; C:GO:0005886; C:GO:0005938; C:GO:0031410; C:GO:0042995	P:actin filament organization; P:establishment or maintenance of cell polarity; P:small GTPase mediated signal transduction; P:regulation of cell shape; P:cortical cytoskeleton organization; P:regulation of actin cytoskeleton organization; F:GTPase activity; F:GTP binding; F:protein kinase binding; C:nucleus; C:cytoskeleton; C:plasma membrane; C:cell cortex; C:cytoplasmic vesicle; C:cell projecti…	EC:3.6.1; EC:3.6; EC:3	Acting on acid anhydrides; Acting on acid anhydrides; Hydrolases
evm.model.Aet_chr_6.6375	Chr6	434245272	434246289	-	XM_020309971.2	cyclin-dependent kinase inhibitor 1-like	747	20	4.68718e-69	68.28	3	P:GO:0045736; F:GO:0004861; C:GO:0005634	P:negative regulation of cyclin-dependent protein serine/threonine kinase activity; F:cyclin-dependent protein serine/threonine kinase inhibitor activity; C:nucleus	EC:2.7.1	Transferring phosphorus-containing groups
evm.model.Aet_chr_6.6898	Chr6	458286390	458287565	+	XM_020294159.2	cold-shock protein CS120	1176	NA	NA	NA	NA	NA	NA	NA	NA
evm.model.Aet_chr_6.6914	Chr6	459441994	459442606	-	XM_020332713.2	dehydrin 7	504	20	4.8984e-18	83.99	4	P:GO:0009414; P:GO:0009631; P:GO:0009737; C:GO:0005829	P:response to water deprivation; P:cold acclimation; P:response to abscisic acid; C:cytosol	NA	NA
evm.model.Aet_chr_7.127	Chr7	3688973	3690259	-	XM_020304936.2	NAC domain-containing protein 7	1011	20	0.0	92.25	2	P:GO:0006355; F:GO:0003677	P:regulation of transcription, DNA-templated; F:DNA binding	NA	NA
evm.model.Aet_chr_7.250	Chr7	6364240	6366584	+	XM_020343714.2	GS-7A	510	20	3.48717e-67	97.39	NA	NA	NA	NA	NA
evm.model.Aet_chr_7.2073	Chr7	69162589	69163615	-	XM_020344564.2	FT1	534	20	3.64026e-107	98.81	7	P:GO:0009909; P:GO:0010229; P:GO:0016310; P:GO:0048510; P:GO:0048573; F:GO:0008429; F:GO:0016301	P:regulation of flower development; P:inflorescence development; P:phosphorylation; P:regulation of timing of transition from vegetative to reproductive phase; P:photoperiodism, flowering; F:phosphatidylethanolamine binding; F:kinase activity	EC:2.7; EC:2	Transferring phosphorus-containing groups; Transferases
evm.model.Aet_chr_7.3257	Chr7	125131675	125136322	+	XM_020341560.2	ABSCISIC ACID-INSENSITIVE 5-like protein 5	1038	20	3.32629e-174	88.4	7	P:GO:0009414; P:GO:0009651; P:GO:0009789; P:GO:0045893; F:GO:0003700; F:GO:0043565; C:GO:0005634	P:response to water deprivation; P:response to salt stress; P:positive regulation of abscisic acid-activated signaling pathway; P:positive regulation of transcription, DNA-templated; F:DNA-binding transcription factor activity; F:sequence-specific DNA binding; C:nucleus	NA	NA
evm.model.Aet_chr_7.3616	Chr7	148556135	148559707	+	XM_020320069.2	rac-like GTP-binding protein 4	642	20	1.34545e-137	95.72	15	P:GO:0007015; P:GO:0007163; P:GO:0007264; P:GO:0008360; P:GO:0030865; P:GO:0032956; F:GO:0003924; F:GO:0005525; F:GO:0019901; C:GO:0005634; C:GO:0005856; C:GO:0005886; C:GO:0005938; C:GO:0031410; C:GO:0042995	P:actin filament organization; P:establishment or maintenance of cell polarity; P:small GTPase mediated signal transduction; P:regulation of cell shape; P:cortical cytoskeleton organization; P:regulation of actin cytoskeleton organization; F:GTPase activity; F:GTP binding; F:protein kinase binding; C:nucleus; C:cytoskeleton; C:plasma membrane; C:cell cortex; C:cytoplasmic vesicle; C:cell projecti…	EC:3.6.1; EC:3.6; EC:3	Acting on acid anhydrides; Acting on acid anhydrides; Hydrolases
evm.model.Aet_chr_7.3684	Chr7	153327243	153328405	+	XM_020293065.1	NAC domain-containing protein 100-like	1050	20	0.0	81.24	5	P:GO:0006355; F:GO:0003677; F:GO:0003735; F:GO:0070181; C:GO:0005763	P:regulation of transcription, DNA-templated; F:DNA binding; F:structural constituent of ribosome; F:small ribosomal subunit rRNA binding; C:mitochondrial small ribosomal subunit	NA	NA
evm.model.Aet_chr_7.4069	Chr7	177484176	177485069	-	XM_020322572.1	nuclear transcription factor Y subunit B-8-like	894	20	1.24118e-156	88.16	5	P:GO:0045944; F:GO:0000978; F:GO:0001228; F:GO:0046982; C:GO:0016602	P:positive regulation of transcription by RNA polymerase II; F:RNA polymerase II cis-regulatory region sequence-specific DNA binding; F:DNA-binding transcription activator activity, RNA polymerase II-specific; F:protein heterodimerization activity; C:CCAAT-binding factor complex	NA	NA
evm.model.Aet_chr_7.4504	Chr7	206970783	206974724	-	XM_020301926.2	heat shock protein 90	2103	20	0.0	98.93	9	P:GO:0006457; P:GO:0034605; P:GO:0050821; F:GO:0005524; F:GO:0051082; C:GO:0005829; C:GO:0005886; C:GO:0032991; C:GO:0048471	P:protein folding; P:cellular response to heat; P:protein stabilization; F:ATP binding; F:unfolded protein binding; C:cytosol; C:plasma membrane; C:protein-containing complex; C:perinuclear region of cytoplasm	NA	NA
evm.model.Aet_chr_7.5924	Chr7	356344976	356358380	+	XM_020339749.2	14-3-3-like protein GF14-A	789	20	1.82801e-170	96.52	NA	NA	NA	NA	NA
evm.model.Aet_chr_7.6012	Chr7	369347958	369351451	-	XM_020325667.2	NAC domain-containing protein 78	2085	20	0.0	96.08	3	P:GO:0006355; F:GO:0003677; C:GO:0016021	P:regulation of transcription, DNA-templated; F:DNA binding; C:integral component of membrane	NA	NA
evm.model.Aet_chr_7.6491	Chr7	411535989	411538990	+	XM_020303670.2	PHD finger protein EHD3-like	1692	20	0.0	81.84	7	P:GO:0045892; P:GO:0045944; P:GO:0048586; F:GO:0003712; F:GO:0042393; F:GO:0046872; C:GO:0005634	P:negative regulation of transcription, DNA-templated; P:positive regulation of transcription by RNA polymerase II; P:regulation of long-day photoperiodism, flowering; F:transcription coregulator activity; F:histone binding; F:metal ion binding; C:nucleus	NA	NA
evm.model.Aet_chr_7.7218	Chr7	466862420	466863970	+	XM_020301477.2	cytochrome P450 711A1	1551	20	0.0	86.21	5	F:GO:0004497; F:GO:0005506; F:GO:0016705; F:GO:0020037; C:GO:0016021	F:monooxygenase activity; F:iron ion binding; F:oxidoreductase activity, acting on paired donors, with incorporation or reduction of molecular oxygen; F:heme binding; C:integral component of membrane	EC:1; EC:1.14	Oxidoreductases; Acting on paired donors, with incorporation or reduction of molecular oxygen. The oxygen incorporated need not be derived from O(2)
evm.model.Aet_chr_7.1078	Chr7	32122395	32124309	+	NA	putative F-box protein At3g25750	1299	20	0.0	75.11	NA	NA	NA	NA	NA

## Sheet: Dubcovsky
Chromosome	CDS start	CDS end	Strand	Lengs of CDS	Function	Reference
Chr1	110685267	110690433	-	5166	ZIP11	Pearce, S., F. Tabbita, D. Cantu, V. Buffalo, R. Avni, H. Vazquez-Gross, R.R. Zhao, C.J. Conley, A. Distelfeld, and J. Dubcovksy, Regulation of Zn and Fe transporters by the GPC1 gene during early wheat monocarpic senescence. Bmc Plant Biology, 2014. 14.
Chr1	135187647	135190465	-	2818	ZIP7	Pearce, S., F. Tabbita, D. Cantu, V. Buffalo, R. Avni, H. Vazquez-Gross, R.R. Zhao, C.J. Conley, A. Distelfeld, and J. Dubcovksy, Regulation of Zn and Fe transporters by the GPC1 gene during early wheat monocarpic senescence. Bmc Plant Biology, 2014. 14.
Chr1	137287678	137292019	-	4341	GA2OX10	Pearce, S., A.K. Huttly, I.M. Prosser, Y.D. Li, S.P. Vaughan, B. Gallova, A. Patil, J.A. Coghill, J. Dubcovsky, P. Hedden, and A.L. Phillips, Heterologous expression and transcript analysis of gibberellin biosynthetic genes of grasses reveals novel functionality in the GA3ox family. Bmc Plant Biology, 2015. 15.
Chr1	210339497	210342472	-	2975	KRP4	Patent Number(s): US 09745596
Chr1	287226595	287229227	+	2632	XB12	Cantu, D., B. Yang, R. Ruan, K. Li, V. Menzo, D. Fu, M. Chern, P.C. Ronald, and J. Dubcovsky, Comparative analysis of the defense response interactomes of rice and wheat. BMC Genomics, 2013. 14: 166.
Chr1	293286886	293298389	-	11503	SOC1.1	Pearce, S., L.S. Vanzetti, and J. Dubcovsky, Exogenous gibberellins induce wheat spike development under short days only in the presence of VERNALIZATION1. Plant Physiology, 2013. 163: 1433-45.
Chr1	315235123	315236958	+	1835	CONSTANS9
Chr1	327778262	327778786	+	524	NRRH1	Cantu, D., B. Yang, R. Ruan, K. Li, V. Menzo, D. Fu, M. Chern, P.C. Ronald, and J. Dubcovsky, Comparative analysis of the defense response interactomes of rice and wheat. BMC Genomics, 2013. 14: 166.
Chr1	352137642	352139346	+	1704	GID1	Pearce, S., A.K. Huttly, I.M. Prosser, Y.D. Li, S.P. Vaughan, B. Gallova, A. Patil, J.A. Coghill, J. Dubcovsky, P. Hedden, and A.L. Phillips, Heterologous expression and transcript analysis of gibberellin biosynthetic genes of grasses reveals novel functionality in the GA3ox family. Bmc Plant Biology, 2015. 15.
Chr1	365323943	365326275	+	2332	GA20OX4	Pearce, S., A.K. Huttly, I.M. Prosser, Y.D. Li, S.P. Vaughan, B. Gallova, A. Patil, J.A. Coghill, J. Dubcovsky, P. Hedden, and A.L. Phillips, Heterologous expression and transcript analysis of gibberellin biosynthetic genes of grasses reveals novel functionality in the GA3ox family. Bmc Plant Biology, 2015. 15.
Chr1	407123718	407130401	-	6683	CYTOCHROME P450 714D1-like
Chr1	410134432	410137681	+	3249	FDL2	Li, C. and J. Dubcovsky, Wheat FT protein regulates VRN1 transcription through interactions with FDL2. The Plant Journal, 2008. 55: 543-554.
Chr1	410141901	410145010	-	3109	CEN3
Chr1	419196971	419198387	-	1416	GLU1x
Chr1	419196971	419255937	-	58966	GLU1y
Chr1	433598000	433599141	-	1141	GA2OX-A4	Pearce, S., A.K. Huttly, I.M. Prosser, Y.D. Li, S.P. Vaughan, B. Gallova, A. Patil, J.A. Coghill, J. Dubcovsky, P. Hedden, and A.L. Phillips, Heterologous expression and transcript analysis of gibberellin biosynthetic genes of grasses reveals novel functionality in the GA3ox family. Bmc Plant Biology, 2015. 15.
Chr1	437260674	437262119	-	1445	FT3	Lv, B., R. Nitcher, X. Han, S. Wang, F. Ni, K. Li, S. Pearce, J. Wu, J. Dubcovsky, and D. Fu, Characterization of FLOWERING LOCUS T1 (FT1) gene in Brachypodium and wheat. Plos One, 2014. 9: e94171.
Chr1	474078953	474080399	-	1446	GA2OX8	Pearce, S., A.K. Huttly, I.M. Prosser, Y.D. Li, S.P. Vaughan, B. Gallova, A. Patil, J.A. Coghill, J. Dubcovsky, P. Hedden, and A.L. Phillips, Heterologous expression and transcript analysis of gibberellin biosynthetic genes of grasses reveals novel functionality in the GA3ox family. Bmc Plant Biology, 2015. 15.
Chr1	498824021	498836411	-	12390	MOT1	Alvarez, M.A., G. Tranquilli, S. Lewis, N. Kippes, and J. Dubcovsky, Genetic and physical mapping of the earliness per se locus Eps-Am1 in Triticum monococcum identifies EARLY FLOWERING 3 (ELF3) as a candidate gene. Functional & Integrative Genomics, 2016. 16: 365-82.
Chr1	498856866	498861876	-	5010	FTSH4	Alvarez, M.A., G. Tranquilli, S. Lewis, N. Kippes, and J. Dubcovsky, Genetic and physical mapping of the earliness per se locus Eps-Am1 in Triticum monococcum identifies EARLY FLOWERING 3 (ELF3) as a candidate gene. Functional & Integrative Genomics, 2016. 16: 365-82.
Chr1	499967860	499971887	-	4027	ELF3	Alvarez, M.A., G. Tranquilli, S. Lewis, N. Kippes, and J. Dubcovsky, Genetic and physical mapping of the earliness per se locus Eps-Am1 in Triticum monococcum identifies EARLY FLOWERING 3 (ELF3) as a candidate gene. Functional & Integrative Genomics, 2016. 16: 365-82.
Chr2	12379878	12382376	-	2498	HSP90.1	Cantu, D., B. Yang, R. Ruan, K. Li, V. Menzo, D. Fu, M. Chern, P.C. Ronald, and J. Dubcovsky, Comparative analysis of the defense response interactomes of rice and wheat. BMC Genomics, 2013. 14: 166.
Chr2	35161363	35164489	-	3126	PPD1	Shaw, L.M., C.X. Li, D.P. Woods, M.A. Alvarez, H.Q. Lin, M.Y. Lau, A. Chen, and J. Dubcovsky, Epistatic interactions between PHOTOPERIOD1, CONSTANS1 and CONSTANS2 modulate the photoperiodic response in wheat. Plos Genetics, 2020. 16.
Chr2	79808490	79810389	-	1899	FT4	Lv, B., R. Nitcher, X. Han, S. Wang, F. Ni, K. Li, S. Pearce, J. Wu, J. Dubcovsky, and D. Fu, Characterization of FLOWERING LOCUS T1 (FT1) gene in Brachypodium and wheat. Plos One, 2014. 9: e94171.
Chr2	127086480	127110558	-	24078	FUL3	Li, C.X., H.Q. Lin, A. Chen, M. Lau, J. Jernstedt, and J. Dubcovsky, Wheat VRN1, FUL2 and FUL3 play critical and redundant roles in spikelet development and spike determinacy. Development, 2019. 146: dev175398.
Chr2	164960857	164962457	-	1600	GPC2 (= NAM2)	Uauy, C., A. Distelfeld, T. Fahima, A. Blechl, and J. Dubcovsky, A NAC gene regulating senescence improves grain protein, zinc and iron content in wheat. Science, 2006. 314: 1298-1300.
Chr2	317346593	317352914	+	6321	FUL2	Li, C.X., H.Q. Lin, A. Chen, M. Lau, J. Jernstedt, and J. Dubcovsky, Wheat VRN1, FUL2 and FUL3 play critical and redundant roles in spikelet development and spike determinacy. Development, 2019. 146: dev175398.
Chr2	371498726	371508679	-	9953	SBEIIa	Hazard, B., X. Zhang, P. Colasuonno, C. Uauy, D.M. Beckles, and J. Dubcovsky, Induced mutations in the Starch Branching Enzyme II (SBEII) genes increase amylose and resistant starch content in pasta wheat Crop Science, 2012. 52: 1754-1766.
Chr2	390965295	390972105	-	6810	TIC40
Chr2	393911771	393931610	+	19839	SBEIIb	Hazard, B., X. Zhang, P. Colasuonno, C. Uauy, D.M. Beckles, and J. Dubcovsky, Induced mutations in the Starch Branching Enzyme II (SBEII) genes increase amylose and resistant starch content in pasta wheat Crop Science, 2012. 52: 1754-1766.
Chr2	417440616	417442656	+	2040	14-3-3C (=GF14C)	Li, C., H. Lin, and J. Dubcovsky, Factorial combinations of protein interactions generate a multiplicity of florigen activation complexes in wheat and barley. The Plant Journal, 2015. 84: 70-82.
Chr2	440180349	440182305	-	1956	FT7	Lv, B., R. Nitcher, X. Han, S. Wang, F. Ni, K. Li, S. Pearce, J. Wu, J. Dubcovsky, and D. Fu, Characterization of FLOWERING LOCUS T1 (FT1) gene in Brachypodium and wheat. Plos One, 2014. 9: e94171.
Chr2	477735198	477737216	+	2018	GA2OX6	Pearce, S., A.K. Huttly, I.M. Prosser, Y.D. Li, S.P. Vaughan, B. Gallova, A. Patil, J.A. Coghill, J. Dubcovsky, P. Hedden, and A.L. Phillips, Heterologous expression and transcript analysis of gibberellin biosynthetic genes of grasses reveals novel functionality in the GA3ox family. Bmc Plant Biology, 2015. 15.
Chr2	502255183	502256700	+	1517	HYD1	Qin, X., K. Fischer, S. Yu, J. Dubcovsky, and L. Tian, Distinct expression and function of carotenoid metabolic genes and homoeologs in developing wheat grains. BMC Plant Biol, 2016. 16: 155.
Chr2	505755996	505756649	-	653	CBF11	Miller A. K., G. Galiba, and J. Dubcovsky. 2006. A cluster of eleven CBF transcription factors is located at the frost tolerance locus Fr-Am2 in Triticum monococcum. Mol. Gen. Genomics. 275: 193–203
Chr2	524142845	524146323	+	3478	RAR1	Cantu, D., B. Yang, R. Ruan, K. Li, V. Menzo, D. Fu, M. Chern, P.C. Ronald, and J. Dubcovsky, Comparative analysis of the defense response interactomes of rice and wheat. BMC Genomics, 2013. 14: 166.
Chr2	533316268	533318331	+	2063	ZIP3	Pearce, S., F. Tabbita, D. Cantu, V. Buffalo, R. Avni, H. Vazquez-Gross, R.R. Zhao, C.J. Conley, A. Distelfeld, and J. Dubcovksy, Regulation of Zn and Fe transporters by the GPC1 gene during early wheat monocarpic senescence. Bmc Plant Biology, 2014. 14.
Chr2	548821842	548825125	+	3283	LFY	Pearce, S., L.S. Vanzetti, and J. Dubcovsky, Exogenous gibberellins induce wheat spike development under short days only in the presence of VERNALIZATION1. Plant Physiology, 2013. 163: 1433-45.
Chr2	566671768	566682950	-	11182	ABC TRANSPORTER C family member 2
Chr2	569550490	569552655	-	2165	PPO1b
Chr2	569550665	569552630	-	1965	PPO1h
Chr2	585726225	585727398	-	1173	WRKY45
Chr3	6728776	6729449	+	673	NF-YB3	Li, C., A. Distelfeld, A. Comis, and J. Dubcovsky, Wheat flowering repressor VRN2 and promoter CO2 compete for interactions with NUCLEAR FACTOR-Y complexes. Plant Journal, 2011. 67: 763-73.
Chr3	13434750	13440155	+	5405	SYNAPTOTAGMIN-4-like
Chr3	24770561	24771997	-	1436	14-3-3B (= GF14B)	Li, C., H. Lin, and J. Dubcovsky, Factorial combinations of protein interactions generate a multiplicity of florigen activation complexes in wheat and barley. The Plant Journal, 2015. 84: 70-82.
Chr3	24772522	24773178	-	656	GID2	Pearce, S., A.K. Huttly, I.M. Prosser, Y.D. Li, S.P. Vaughan, B. Gallova, A. Patil, J.A. Coghill, J. Dubcovsky, P. Hedden, and A.L. Phillips, Heterologous expression and transcript analysis of gibberellin biosynthetic genes of grasses reveals novel functionality in the GA3ox family. Bmc Plant Biology, 2015. 15.
Chr3	43670056	43672189	-	2133	SHIKAMATE KINASE
Chr3	54357061	54358598	-	1537	DRE-BINDING PROTEIN 2
Chr3	64367208	64485550	+	118342	NPR1	Cantu, D., B. Yang, R. Ruan, K. Li, V. Menzo, D. Fu, M. Chern, P.C. Ronald, and J. Dubcovsky, Comparative analysis of the defense response interactomes of rice and wheat. BMC Genomics, 2013. 14: 166.
Chr3	84259842	84261350	+	1508	GA3OX2	Pearce, S., A.K. Huttly, I.M. Prosser, Y.D. Li, S.P. Vaughan, B. Gallova, A. Patil, J.A. Coghill, J. Dubcovsky, P. Hedden, and A.L. Phillips, Heterologous expression and transcript analysis of gibberellin biosynthetic genes of grasses reveals novel functionality in the GA3ox family. Bmc Plant Biology, 2015. 15.
Chr3	110015383	110018437	-	3054	FT2	Shaw, L.M., B. Lyu, R. Turner, C. Li, F. Chen, X. Han, D. Fu, and J. Dubcovsky, FLOWERING LOCUS T2 regulates spike development and fertility in temperate cereals. Journal of Experimental Botany, 2019. 70: 193–204.
Chr3	112569310	112572752	-	3442	SGNH
Chr3	116780571	116782786	+	2215	GA2OX7	Pearce, S., A.K. Huttly, I.M. Prosser, Y.D. Li, S.P. Vaughan, B. Gallova, A. Patil, J.A. Coghill, J. Dubcovsky, P. Hedden, and A.L. Phillips, Heterologous expression and transcript analysis of gibberellin biosynthetic genes of grasses reveals novel functionality in the GA3ox family. Bmc Plant Biology, 2015. 15.
Chr3	291229069	291232806	+	3737	LCYe	Qin, X., K. Fischer, S. Yu, J. Dubcovsky, and L. Tian, Distinct expression and function of carotenoid metabolic genes and homoeologs in developing wheat grains. BMC Plant Biol, 2016. 16: 155.
Chr3	291233279	291236067	+	2788	UBCP35
Chr3	321572773	321579399	+	6626	SGT1	Cantu, D., B. Yang, R. Ruan, K. Li, V. Menzo, D. Fu, M. Chern, P.C. Ronald, and J. Dubcovsky, Comparative analysis of the defense response interactomes of rice and wheat. BMC Genomics, 2013. 14: 166.
Chr3	412333952	412335765	-	1813	GA2OX3	Pearce, S., A.K. Huttly, I.M. Prosser, Y.D. Li, S.P. Vaughan, B. Gallova, A. Patil, J.A. Coghill, J. Dubcovsky, P. Hedden, and A.L. Phillips, Heterologous expression and transcript analysis of gibberellin biosynthetic genes of grasses reveals novel functionality in the GA3ox family. Bmc Plant Biology, 2015. 15.
Chr3	425701713	425704532	+	2819	NPR4	Wang, X., B. Yang, K. Li, Z. Kang, D. Cantu, and J. Dubcovsky, A conserved Puccinia striiformis protein interacts with wheat NPR1 and reduces induction of Pathogenesis-Related genes in response to pathogens. Molecular Plant-Microbe Interactions, 2016. 29: 977-989.
Chr3	450678923	450682454	-	3531	FDL4	Li, C., H. Lin, and J. Dubcovsky, Factorial combinations of protein interactions generate a multiplicity of florigen activation complexes in wheat and barley. The Plant Journal, 2015. 84: 70-82.
Chr3	488052633	488059778	-	7145	LG2	Cantu, D., B. Yang, R. Ruan, K. Li, V. Menzo, D. Fu, M. Chern, P.C. Ronald, and J. Dubcovsky, Comparative analysis of the defense response interactomes of rice and wheat. BMC Genomics, 2013. 14: 166.
Chr3	516895191	516896831	+	1640	GA20OX3	Pearce, S., A.K. Huttly, I.M. Prosser, Y.D. Li, S.P. Vaughan, B. Gallova, A. Patil, J.A. Coghill, J. Dubcovsky, P. Hedden, and A.L. Phillips, Heterologous expression and transcript analysis of gibberellin biosynthetic genes of grasses reveals novel functionality in the GA3ox family. Bmc Plant Biology, 2015. 15.
Chr3	524544765	524547779	-	3014	GA20OX2	Pearce, S., A.K. Huttly, I.M. Prosser, Y.D. Li, S.P. Vaughan, B. Gallova, A. Patil, J.A. Coghill, J. Dubcovsky, P. Hedden, and A.L. Phillips, Heterologous expression and transcript analysis of gibberellin biosynthetic genes of grasses reveals novel functionality in the GA3ox family. Bmc Plant Biology, 2015. 15.
Chr3	586847808	586852931	+	5123	S-FORMYLGLUTATHIONE
Chr3	586847844	586852664	+	4820	S-FORMYLGLUTATHIONE
Chr3	586863667	586873753	+	10086	CC-NBS-LRR	Saintenac, C., W. Zhang, A. Salcedo, M. Rousse, H. Trick, E. Akhunov, and J. Dubcovsky, Identification of wheat gene Sr35 that confers resistance to Ug99 stem rust race group. Science, 2013. 341: 783-786.
Chr3	620411872	620413111	-	1239	ZIP1	Pearce, S., F. Tabbita, D. Cantu, V. Buffalo, R. Avni, H. Vazquez-Gross, R.R. Zhao, C.J. Conley, A. Distelfeld, and J. Dubcovksy, Regulation of Zn and Fe transporters by the GPC1 gene during early wheat monocarpic senescence. Bmc Plant Biology, 2014. 14.
Chr4	6763882	6766833	-	2951	NPR3	Wang, X., B. Yang, K. Li, Z. Kang, D. Cantu, and J. Dubcovsky, A conserved Puccinia striiformis protein interacts with wheat NPR1 and reduces induction of Pathogenesis-Related genes in response to pathogens. Molecular Plant-Microbe Interactions, 2016. 29: 977-989.
Chr4	6791503	6793428	+	1925	ZIP4	Pearce, S., F. Tabbita, D. Cantu, V. Buffalo, R. Avni, H. Vazquez-Gross, R.R. Zhao, C.J. Conley, A. Distelfeld, and J. Dubcovksy, Regulation of Zn and Fe transporters by the GPC1 gene during early wheat monocarpic senescence. Bmc Plant Biology, 2014. 14.
Chr4	20537577	20539448	+	1871	RHT1a	Mo, Y., S. Pearce, and J. Dubcovsky, Phenotypic and transcriptomic characterization of a wheat tall mutant carrying an induced mutation in the C-terminal PFYRE motif of RHT-B1b. BMC Plant Biol, 2018. 18: 253.
Chr4	23710098	23711661	-	1563	14-3-3A (=GF14A)	Li, C., H. Lin, and J. Dubcovsky, Factorial combinations of protein interactions generate a multiplicity of florigen activation complexes in wheat and barley. The Plant Journal, 2015. 84: 70-82.
Chr4	71174731	71184639	+	9908	FANCM	Mieulet, D., G. Aubert, C. Bres, A. Klein, G. Droc, E. Vieille, C. Rond-Coissieux, M. Sanchez, M. Dalmais, J.P. Mauxion, C. Rothan, E. Guiderdoni, and R. Mercier, Unleashing meiotic crossovers in crops. Nature Plants, 2018. 4: 1010-1016.
Chr4	183490777	183494360	+	3583	14-3-3H (=GF14H)	Li, C., H. Lin, and J. Dubcovsky, Factorial combinations of protein interactions generate a multiplicity of florigen activation complexes in wheat and barley. The Plant Journal, 2015. 84: 70-82.
Chr4	189558686	189561379	-	2693	14-3-3F (=GF14F)	Li, C., H. Lin, and J. Dubcovsky, Factorial combinations of protein interactions generate a multiplicity of florigen activation complexes in wheat and barley. The Plant Journal, 2015. 84: 70-82.
Chr4	316538158	316540206	+	2048	FDL5	Li, C., H. Lin, and J. Dubcovsky, Factorial combinations of protein interactions generate a multiplicity of florigen activation complexes in wheat and barley. The Plant Journal, 2015. 84: 70-82.
Chr4	327740892	327748357	-	7465	PHYB	Chen, A., C. Li, W. Hu, M.Y. Lau, H. Lin, N.C. Rockwell, S.S. Martin, J.A. Jernstedt, J.C. Lagarias, and J. Dubcovsky, Phytochrome C plays a major role in the acceleration of wheat flowering under long-day photoperiod. Proc Natl Acad Sci U S A, 2014. 111: 10037-44.
Chr4	426745027	426749127	+	4100	DHHC-type
Chr4	454811476	454814520	+	3044	ZIP6	Pearce, S., F. Tabbita, D. Cantu, V. Buffalo, R. Avni, H. Vazquez-Gross, R.R. Zhao, C.J. Conley, A. Distelfeld, and J. Dubcovksy, Regulation of Zn and Fe transporters by the GPC1 gene during early wheat monocarpic senescence. Bmc Plant Biology, 2014. 14.
Chr4	475175892	475191270	-	15378	SVP3	Li, K., J.M. Debernardi, C. Li, H. Lin, C. Zhang, and J. Dubcovsky, Interactions between SQUAMOSA and SVP MADS-box proteins regulate meristem transitions during wheat spike development. bioRxiv, 2020: 2020.12.01.405779.
Chr4	486516833	486518399	-	1566	HYD2	Qin, X., K. Fischer, S. Yu, J. Dubcovsky, and L. Tian, Distinct expression and function of carotenoid metabolic genes and homoeologs in developing wheat grains. BMC Plant Biol, 2016. 16: 155.
Chr4	495940676	495942792	+	2116	KRP5	Patent Number(s): US 09745596
Chr4	504623881	504637290	+	13409	SOC1.3	Pearce, S., L.S. Vanzetti, and J. Dubcovsky, Exogenous gibberellins induce wheat spike development under short days only in the presence of VERNALIZATION1. Plant Physiology, 2013. 163: 1433-45.
Chr4	515801108	515802917	-	1809	ZCCT2 (VRN2)	Yan, L., M. Helguera, K. Kato, S. Fukuyama, J. Sherman, and J. Dubcovsky, Allelic variation at the VRN-1 promoter region in polyploid wheat. Theoretical and Applied Genetics, 2004. 109: 1677-1686.
Chr4	515885514	515887537	-	2023	ZCCT1 (VRN2)	Yan, L., M. Helguera, K. Kato, S. Fukuyama, J. Sherman, and J. Dubcovsky, Allelic variation at the VRN-1 promoter region in polyploid wheat. Theoretical and Applied Genetics, 2004. 109: 1677-1686.
Chr4	517884278	517897947	-	13669	FT5	Lv, B., R. Nitcher, X. Han, S. Wang, F. Ni, K. Li, S. Pearce, J. Wu, J. Dubcovsky, and D. Fu, Characterization of FLOWERING LOCUS T1 (FT1) gene in Brachypodium and wheat. Plos One, 2014. 9: e94171.
Chr4	521941606	521944914	-	3308	BMY1
Chr4	522241839	522248238	+	6399	TRANSDUCIN
Chr5	2377775	2383415	+	5640	CCD1	Qin, X., K. Fischer, S. Yu, J. Dubcovsky, and L. Tian, Distinct expression and function of carotenoid metabolic genes and homoeologs in developing wheat grains. BMC Plant Biol, 2016. 16: 155.
Chr5	7097188	7278949	+	181761	TSN1	Faris, J.D., Z.C. Zhang, H.J. Lu, S.W. Lu, L. Reddy, S. Cloutier, J.P. Fellers, S.W. Meinhardt, J.B. Rasmussen, S.S. Xu, R.P. Oliver, K.J. Simons, and T.L. Friesen, A unique wheat disease resistance-like gene governs effector-triggered susceptibility to necrotrophic pathogens. Proceedings of the National Academy of Sciences of the United States of America, 2010. 107: 13544-13549.
Chr5	177670374	177675720	-	5346	AGL31
Chr5	238520768	238522834	-	2066	FDL6	Li, C., H. Lin, and J. Dubcovsky, Factorial combinations of protein interactions generate a multiplicity of florigen activation complexes in wheat and barley. The Plant Journal, 2015. 84: 70-82.
Chr5	377369972	377373187	-	3215	HSP90.3	Cantu, D., B. Yang, R. Ruan, K. Li, V. Menzo, D. Fu, M. Chern, P.C. Ronald, and J. Dubcovsky, Comparative analysis of the defense response interactomes of rice and wheat. BMC Genomics, 2013. 14: 166.
Chr5	474117244	474121445	+	4201	PHYC	Chen, A., C. Li, W. Hu, M.Y. Lau, H. Lin, N.C. Rockwell, S.S. Martin, J.A. Jernstedt, J.C. Lagarias, and J. Dubcovsky, Phytochrome C plays a major role in the acceleration of wheat flowering under long-day photoperiod. Proc Natl Acad Sci U S A, 2014. 111: 10037-44.
Chr5	474983280	474994718	-	11438	VRN1	Yan, L., A. Loukoianov, G. Tranquilli, M. Helguera, T. Fahima, and J. Dubcovsky, Positional cloning of wheat vernalization gene VRN1. Proceedings of the National Academy of Sciences of the United States of America, 2003. 100: 6263-6268.
Chr5	475219475	475225708	-	6233	AGLG1	Yan, L., A. Loukoianov, G. Tranquilli, M. Helguera, T. Fahima, and J. Dubcovsky, Positional cloning of wheat vernalization gene VRN1. Proceedings of the National Academy of Sciences of the United States of America, 2003. 100: 6263-6268.
Chr5	509866780	509867833	+	1053	ES43-2
Chr5	569420247	569421414	-	1167	GA20OX1	Pearce, S., A.K. Huttly, I.M. Prosser, Y.D. Li, S.P. Vaughan, B. Gallova, A. Patil, J.A. Coghill, J. Dubcovsky, P. Hedden, and A.L. Phillips, Heterologous expression and transcript analysis of gibberellin biosynthetic genes of grasses reveals novel functionality in the GA3ox family. Bmc Plant Biology, 2015. 15.
Chr6	5249978	5256704	+	6726	SOC1.2	Pearce, S., L.S. Vanzetti, and J. Dubcovsky, Exogenous gibberellins induce wheat spike development under short days only in the presence of VERNALIZATION1. Plant Physiology, 2013. 163: 1433-45.
Chr6	78085352	78087209	+	1857	ZIP10	Pearce, S., F. Tabbita, D. Cantu, V. Buffalo, R. Avni, H. Vazquez-Gross, R.R. Zhao, C.J. Conley, A. Distelfeld, and J. Dubcovksy, Regulation of Zn and Fe transporters by the GPC1 gene during early wheat monocarpic senescence. Bmc Plant Biology, 2014. 14.
Chr6	84731938	84733487	-	1549	GPC1 (NAM1)	Uauy, C., A. Distelfeld, T. Fahima, A. Blechl, and J. Dubcovsky, A NAC gene regulating senescence improves grain protein, zinc and iron content in wheat. Science, 2006. 314: 1298-1300.
Chr6	150599461	150600514	-	1053	FT6	Lv, B., R. Nitcher, X. Han, S. Wang, F. Ni, K. Li, S. Pearce, J. Wu, J. Dubcovsky, and D. Fu, Characterization of FLOWERING LOCUS T1 (FT1) gene in Brachypodium and wheat. Plos One, 2014. 9: e94171.
Chr6	325147822	325150531	-	2709	GA2OX9	Pearce, S., A.K. Huttly, I.M. Prosser, Y.D. Li, S.P. Vaughan, B. Gallova, A. Patil, J.A. Coghill, J. Dubcovsky, P. Hedden, and A.L. Phillips, Heterologous expression and transcript analysis of gibberellin biosynthetic genes of grasses reveals novel functionality in the GA3ox family. Bmc Plant Biology, 2015. 15.
Chr6	378902537	378904423	-	1886	CCD4	Qin, X., K. Fischer, S. Yu, J. Dubcovsky, and L. Tian, Distinct expression and function of carotenoid metabolic genes and homoeologs in developing wheat grains. BMC Plant Biol, 2016. 16: 155.
Chr6	394431618	394433098	+	1480	ADP,ATP CARRIER PROTEIN 2, mitochondrial
Chr6	402854534	402856699	+	2165	CONSTANS2	Shaw, L.M., C.X. Li, D.P. Woods, M.A. Alvarez, H.Q. Lin, M.Y. Lau, A. Chen, and J. Dubcovsky, Epistatic interactions between PHOTOPERIOD1, CONSTANS1 and CONSTANS2 modulate the photoperiodic response in wheat. Plos Genetics, 2020. 16.
Chr6	427233432	427240000	-	6568	SVP1	Li, K., J.M. Debernardi, C. Li, H. Lin, C. Zhang, and J. Dubcovsky, Interactions between SQUAMOSA and SVP MADS-box proteins regulate meristem transitions during wheat spike development. bioRxiv, 2020: 2020.12.01.405779.
Chr6	434245272	434246289	-	1017	KRP1	Patent Number(s): US 09745596
Chr6	491313443	491481329	-	167886	CNL1 (CC-NBS-LRR)	Zhang, W., S.S. Chen, Z. Abate, J. Nirmala, M.N. Rouse, and J. Dubcovsky, Identification and characterization of Sr13, a tetraploid wheat gene that confers resistance to the Ug99 stem rust race group Proceedings of the National Academy of Sciences of the United States of America, 2017. 114: E9483-E9492.
Chr6	491425369	491429247	-	3878	CNL3 (CC-NBS-LRR)	Zhang, W., S.S. Chen, Z. Abate, J. Nirmala, M.N. Rouse, and J. Dubcovsky, Identification and characterization of Sr13, a tetraploid wheat gene that confers resistance to the Ug99 stem rust race group Proceedings of the National Academy of Sciences of the United States of America, 2017. 114: E9483-E9492.
Chr7	57849610	57858042	-	8432	ZIP9	Pearce, S., F. Tabbita, D. Cantu, V. Buffalo, R. Avni, H. Vazquez-Gross, R.R. Zhao, C.J. Conley, A. Distelfeld, and J. Dubcovksy, Regulation of Zn and Fe transporters by the GPC1 gene during early wheat monocarpic senescence. Bmc Plant Biology, 2014. 14.
Chr7	69162589	69163615	-	1026	FT1	Yan, L., D. Fu, C. Li, A. Blechl, G. Tranquilli, M. Bonafede, A. Sanchez, M. Valarik, S. Yasuda, and J. Dubcovsky, The wheat and barley vernalization gene VRN3 is an orthologue of FT. Proc Natl Acad Sci U S A, 2006. 103: 19581-6.
Chr7	126394352	126395528	-	1176	KRP2	Patent Number(s): US 09745596
Chr7	130412590	130419831	+	7241	VRT2 (=SVP2)	Li, K., J.M. Debernardi, C. Li, H. Lin, C. Zhang, and J. Dubcovsky, Interactions between SQUAMOSA and SVP MADS-box proteins regulate meristem transitions during wheat spike development. bioRxiv, 2020: 2020.12.01.405779.
Chr7	172184131	172186572	+	2441	CONSTANS1	Shaw, L.M., C.X. Li, D.P. Woods, M.A. Alvarez, H.Q. Lin, M.Y. Lau, A. Chen, and J. Dubcovsky, Epistatic interactions between PHOTOPERIOD1, CONSTANS1 and CONSTANS2 modulate the photoperiodic response in wheat. Plos Genetics, 2020. 16.
Chr7	177317978	177358280	-	40302	NF-YB1	Li, C., A. Distelfeld, A. Comis, and J. Dubcovsky, Wheat flowering repressor VRN2 and promoter CO2 compete for interactions with NUCLEAR FACTOR-Y complexes. Plant Journal, 2011. 67: 763-73.
Chr7	177484176	177485069	+	893	NF-YB9	Li, C., A. Distelfeld, A. Comis, and J. Dubcovsky, Wheat flowering repressor VRN2 and promoter CO2 compete for interactions with NUCLEAR FACTOR-Y complexes. Plant Journal, 2011. 67: 763-73.
Chr7	206970783	206974724	-	3941	HSP90.2	Cantu, D., B. Yang, R. Ruan, K. Li, V. Menzo, D. Fu, M. Chern, P.C. Ronald, and J. Dubcovsky, Comparative analysis of the defense response interactomes of rice and wheat. BMC Genomics, 2013. 14: 166.
Chr7	356344976	356358380	+	13404	14-3-3D (=GF14D)	Li, C., H. Lin, and J. Dubcovsky, Factorial combinations of protein interactions generate a multiplicity of florigen activation complexes in wheat and barley. The Plant Journal, 2015. 84: 70-82.
Chr7	411535989	411538990	+	3001	EHD3	Matsubara, K., U. Yamanouchi, Y. Nonoue, K. Sugimoto, Z.X. Wang, Y. Minobe, and M. Yano, Ehd3, encoding a plant homeodomain finger-containing protein, is a critical promoter of rice flowering. Plant Journal, 2011. 66: 603-612. (rice orthologue)
Chr7	560275068	560277660	+	2592	GA2OX2	Pearce, S., A.K. Huttly, I.M. Prosser, Y.D. Li, S.P. Vaughan, B. Gallova, A. Patil, J.A. Coghill, J. Dubcovsky, P. Hedden, and A.L. Phillips, Heterologous expression and transcript analysis of gibberellin biosynthetic genes of grasses reveals novel functionality in the GA3ox family. Bmc Plant Biology, 2015. 15.
Chr7	639308432	639312636	-	4204	PSY1	Zhang, W. and J. Dubcovsky, Association between allelic variation at the Phytoene synthase 1 gene and yellow pigment content in the wheat grain. Theoretical and Applied Genetics, 2008. 116: 635-645.

## Sheet: Galiba
Chr	Start	End	Strand	Description
Chr1	314748373	314751021	+	protein_id "XP_020150034.1"; description "ethylene-responsive transcription factor ERF039-like [Aegilops tauschii subsp. tauschii] e-value:1E-70"; pfam "AP2 domain (PF00847.17)"; homolog#1 "BAK05071.1 predicted protein [Hordeum vulgare subsp. vulgare] e-value:1e-65,"; homolog#2 "XP_015614793.1 ethylene-responsive transcription factor ERF038 [Oryza sativa Japonica Group] AAL79793.1 putative DNA bi…
Chr2	6292834	6293409	-	protein_id "XP_020163738.1"; description "dehydration-responsive element-binding protein 1C-like [Aegilops tauschii subsp. tauschii] e-value:1E-89"; pfam "AP2 domain (PF00847.17)"; homolog#1 "AFR67779.1 AP2 domain CBF protein [Triticum aestivum] e-value:8e-53,"; homolog#2 "ABC86564.1 AP2 domain transcription factor TaDREB3 [Triticum aestivum] e-value:2e-52,"; homolog#3 "AAX28952.1 HvCBF5 [Hordeum…
Chr2	505755996	505756760	-	protein_id "XP_020189672.1"; description "dehydration-responsive element-binding protein 1E-like [Aegilops tauschii subsp. tauschii] e-value:2E-124"; pfam "AP2 domain (PF00847.17)"; homolog#1 "SPT19377.1 unnamed protein product [Triticum aestivum] e-value:3e-124,"; homolog#2 "AAX23717.1 HvCBF11 [Hordeum vulgare subsp. vulgare] AAX23718.1 HvCBF11 [Hordeum vulgare subsp. vulgare] AAX23719.1 HvCBF11…
Chr2	524767069	524767974	-	protein_id "XP_020164576.1"; description "ethylene-responsive transcription factor ERF039-like [Aegilops tauschii subsp. tauschii] e-value:9E-91"; pfam "AP2 domain (PF00847.17), Nuclear RNA-splicing-associated protein (PF10500.6)"; homolog#1 "CAH67505.1 OSIGBa0134H18.7 [Oryza sativa] e-value:1e-63,"; homolog#2 "XP_015634439.1 ethylene-responsive transcription factor ERF038 [Oryza sativa Japonica …
Chr2	525035256	525036109	-	protein_id "XP_020164544.1"; description "ethylene-responsive transcription factor ERF039-like [Aegilops tauschii subsp. tauschii] e-value:2E-99"; pfam "AP2 domain (PF00847.17), GcrA cell cycle regulator (PF07750.8)"; homolog#1 "XP_025825378.1 ethylene-responsive transcription factor ERF039-like [Panicum hallii] PAN39448.1 hypothetical protein PAHAL_7G243400 [Panicum hallii] PUZ48315.1 hypothetic…
Chr2	525056169	525057052	-	protein_id "XP_020164578.1"; description "ethylene-responsive transcription factor ERF038-like [Aegilops tauschii subsp. tauschii] e-value:2E-93"; pfam "AP2 domain (PF00847.17)"; homolog#1 "AAX28965.1 TmCBF7 [Triticum monococcum] e-value:5e-88,"; homolog#2 "AWD06785.1 CBF1 [Agropyron mongolicum] e-value:2e-87,"; homolog#3 "BAJ87193.1 predicted protein [Hordeum vulgare subsp. vulgare] e-value:8e-8…
Chr2	535830370	535831137	-	protein_id "XP_020184692.1"; description "ethylene-responsive transcription factor 4-like [Aegilops tauschii subsp. tauschii] e-value:4E-66"; pfam "AP2 domain (PF00847.17)"; homolog#1 "SPT19655.1 unnamed protein product [Triticum aestivum] e-value:5e-66,"; homolog#2 "BAJ85881.1 predicted protein [Hordeum vulgare subsp. vulgare] BAJ90722.1 predicted protein [Hordeum vulgare subsp. vulgare] BAJ9538…
Chr4	443535232	443537500	+	protein_id "XP_020169042.1"; description "ethylene-responsive transcription factor RAP2-4-like [Aegilops tauschii subsp. tauschii] e-value:2E-164"; pfam "AP2 domain (PF00847.17)"; homolog#1 "AAZ08560.1 DRE binding factor [Triticum aestivum] e-value:3e-163,"; homolog#2 "ABB90886.1 putative DRE binding factor [Triticum aestivum] e-value:3e-158,"; homolog#3 "ABB90544.1 dehydration responsive element…
Chr4	485227890	485229253	+	protein_id "XP_020201406.1"; description "ethylene-responsive transcription factor ERF096-like [Aegilops tauschii subsp. tauschii] e-value:2E-49"; pfam "AP2 domain (PF00847.17)"; homolog#1 "XP_025797533.1 ethylene-responsive transcription factor ERF096-like [Panicum hallii] PAN51557.1 hypothetical protein PAHAL_9G602900 [Panicum hallii] e-value:2e-39,"; homolog#2 "PUZ42821.1 hypothetical protein …
Chr5	75236829	75241107	+	protein_id "XP_020151789.1"; description "uncharacterized protein LOC109736982 [Aegilops tauschii subsp. tauschii] e-value:7E-69"; pfam "not assigned"; homolog#1 "CBX87022.1 CBF8 protein [Aegilops biuncialis] e-value:5e-37,"; homolog#2 "AAX28966.1 TaCBF9 [Triticum aestivum] AFR67806.1 AP2 domain CBF protein [Triticum aestivum] e-value:1e-36,"; homolog#3 "AAY32563.1 CRT/DRE binding factor 9 [Triti…
Chr5	87995599	87995861	+	protein_id "XP_020150051.1"; description "uncharacterized protein LOC109735257 [Aegilops tauschii subsp. tauschii] e-value:5E-53"; pfam "not assigned"; homolog#1 "AAY32562.1 CRT/DRE binding factor 4 [Triticum monococcum] e-value:7e-49,"; homolog#2 "AFR67796.1 AP2 domain CBF protein [Triticum aestivum] e-value:1e-48,"; homolog#3 "AFR67795.1 AP2 domain CBF protein [Triticum aestivum] e-value:3e-46,…
Chr5	417455572	417461864	+	protein_id "XP_020167758.1"; description "dehydration-responsive element-binding protein 1H-like [Aegilops tauschii subsp. tauschii] e-value:1E-26"; pfam "AP2 domain (PF00847.17), AP2 domain (PF00847.17)"; homolog#1 "AAY32564.1 CRT/DRE binding factor 17 [Triticum monococcum] e-value:6e-68,"; homolog#2 "AFR67788.1 AP2 domain CBF protein [Triticum aestivum] e-value:1e-66,"; homolog#3 "BAF36837.1 CR…
Chr5	417464483	417465190	+	protein_id "XP_020179849.1"; description "dehydration-responsive element-binding protein 1H-like [Aegilops tauschii subsp. tauschii] e-value:2E-13"; pfam "not assigned"; homolog#1 "AAY32564.1 CRT/DRE binding factor 17 [Triticum monococcum] e-value:4e-57,"; homolog#2 "AFR67788.1 AP2 domain CBF protein [Triticum aestivum] e-value:2e-54,"; homolog#3 "CBX87016.1 CBF2 protein [Aegilops biuncialis] e-v…
Chr5	417498377	417500991	+	protein_id "XP_020167761.1"; description "dehydration-responsive element-binding protein 1B-like [Aegilops tauschii subsp. tauschii] e-value:2E-112"; pfam "AP2 domain (PF00847.17), Colicin-like bacteriocin tRNase domain (PF03515.11)"; homolog#1 "ABK55387.1 CBFIVd-D9 [Triticum aestivum] e-value:2e-112,"; homolog#2 "AVO65147.1 C-repeat binding factor [Triticum aestivum] e-value:1e-111,"; homolog#3 …
Chr5	417537319	417539057	+	protein_id "XP_020167743.1"; description "dehydration-responsive element-binding protein 1B-like [Aegilops tauschii subsp. tauschii] e-value:3E-130"; pfam "AP2 domain (PF00847.17)"; homolog#1 "AFR67795.1 AP2 domain CBF protein [Triticum aestivum] e-value:4e-130,"; homolog#2 "AAY32562.1 CRT/DRE binding factor 4 [Triticum monococcum] e-value:3e-124,"; homolog#3 "AFR67796.1 AP2 domain CBF protein [T…
Chr5	417621689	417622456	-	protein_id "XP_020167748.1"; description "dehydration-responsive element-binding protein 1B-like [Aegilops tauschii subsp. tauschii] e-value:4E-140"; pfam "AP2 domain (PF00847.17)"; homolog#1 "AFR67792.1 AP2 domain CBF protein [Triticum aestivum] e-value:3e-139,"; homolog#2 "AFR67793.1 AP2 domain CBF protein [Triticum aestivum] e-value:1e-135,"; homolog#3 "AFR67803.1 AP2 domain CBF protein [Triti…
Chr5	417634369	417636538	+	protein_id "XP_020167760.1"; description "dehydration-responsive element-binding protein 1B-like [Aegilops tauschii subsp. tauschii] e-value:2E-161"; pfam "AP2 domain (PF00847.17), Colicin-like bacteriocin tRNase domain (PF03515.11), Protein of unknown function (DUF3042) (PF11240.5), Protein of unknown function (DUF3042) (PF11240.5)"; homolog#1 "ABK55390.1 CBFIVd-D22 [Triticum aestivum] e-value:3…
Chr5	417651693	417652473	-	protein_id "XP_020167747.1"; description "dehydration-responsive element-binding protein 1B-like [Aegilops tauschii subsp. tauschii] e-value:6E-132"; pfam "AP2 domain (PF00847.17)"; homolog#1 "AEE00119.1 CBFIVa-2.3 [Triticum aestivum] e-value:9e-132,"; homolog#2 "ABK55372.1 CBFIVa-A2 [Triticum aestivum] AEE00116.1 CBFIVa-A2 [Triticum aestivum] e-value:4e-127,"; homolog#3 "AAX28961.1 TaCBF2 [Triti…
Chr5	417692603	417694296	+	protein_id "XP_020167753.1"; description "dehydration-responsive element-binding protein 1B-like [Aegilops tauschii subsp. tauschii] e-value:5E-115"; pfam "not assigned"; homolog#1 "ABK55383.1 CBFIVd-4.1 [Triticum aestivum] AKE47415.1 CBFIVd-4.1 [Triticum aestivum] e-value:5e-97,"; homolog#2 "AVO65148.1 C-repeat binding factor [Triticum aestivum] e-value:1e-96,"; homolog#3 "AVO65149.1 C-repeat bi…
Chr5	417850801	417851578	-	protein_id "XP_020167763.1"; description "dehydration-responsive element-binding protein 1B-like [Aegilops tauschii subsp. tauschii] e-value:2E-145"; pfam "AP2 domain (PF00847.17)"; homolog#1 "AAL37944.1 putative CRT/DRE-binding factor [Triticum aestivum] ABK55377.1 CBFIVb-D20 [Triticum aestivum] AEE00124.1 CBFIVb-D20 [Triticum aestivum] AWT24535.1 C-repeat binding factor 1 [Triticum aestivum] e-…
Chr5	417854430	417855506	-	protein_id "XP_020167746.1"; description "dehydration-responsive element-binding protein 1B-like [Aegilops tauschii subsp. tauschii] e-value:7E-98"; pfam "AP2 domain (PF00847.17)"; homolog#1 "ABK55379.1 CBFIVb-D21 [Triticum aestivum] e-value:1e-97,"; homolog#2 "ABK55378.1 CBFIVb-21.1 [Triticum aestivum] e-value:9e-87,"; homolog#3 "AEE00127.1 putative CBFIVb-21.1 [Triticum aestivum] AFR67794.1 AP2…
Chr5	417876102	417876906	-	protein_id "XP_020167759.1"; description "dehydration-responsive element-binding protein 1H-like [Aegilops tauschii subsp. tauschii] e-value:2E-128"; pfam "AP2 domain (PF00847.17), No apical meristem-associated C-terminal domain (PF14303.3), No apical meristem-associated C-terminal domain (PF14303.3)"; homolog#1 "AEE00121.1 putative CBFIIId-B12-like protein [Triticum aestivum] e-value:7e-124,"; h…
Chr5	417883394	417884171	-	protein_id "XP_020167752.1"; description "dehydration-responsive element-binding protein 1B-like [Aegilops tauschii subsp. tauschii] e-value:9E-126"; pfam "AP2 domain (PF00847.17)"; homolog#1 "AEE00122.1 putative CBF2-like protein [Triticum aestivum] e-value:1e-125,"; homolog#2 "AEE00130.1 putative CBF transcription activator [Triticum aestivum] e-value:7e-122,"; homolog#3 "ABB54457.1 dehydration…
Chr5	417954497	417955367	-	protein_id "XP_020167751.1"; description "dehydration-responsive element-binding protein 1H-like [Aegilops tauschii subsp. tauschii] e-value:1E-147"; pfam "AP2 domain (PF00847.17)"; homolog#1 "ABK55371.1 CBFIIId-D19 [Triticum aestivum] e-value:1e-147,"; homolog#2 "AEE00133.1 putative CBFIIId-A19-like transcription activator [Triticum aestivum] e-value:3e-142,"; homolog#3 "AFR67801.1 AP2 domain CB…
Chr5	418156673	418157463	-	protein_id "XP_020167754.1"; description "dehydration-responsive element-binding protein 1H-like [Aegilops tauschii subsp. tauschii] e-value:6E-122"; pfam "AP2 domain (PF00847.17)"; homolog#1 "AEE00134.1 putative CBFIIId-D19-like protein [Triticum aestivum] AFR67789.1 AP2 domain CBF protein [Triticum aestivum] e-value:8e-122,"; homolog#2 "AFR67802.1 AP2 domain CBF protein [Triticum aestivum] e-va…
Chr5	418174215	418174988	-	protein_id "XP_020167745.1"; description "dehydration-responsive element-binding protein 1B-like [Aegilops tauschii subsp. tauschii] e-value:1E-145"; pfam "AP2 domain (PF00847.17)"; homolog#1 "ABK55382.1 CBFIVc-14.3 [Triticum aestivum] AEE00135.1 CBFIVc-14.3 [Triticum aestivum] CDI59414.1 C-repeat binding factor [Triticum aestivum] e-value:5e-143,"; homolog#2 "AAT76662.1 C repeat-binding factor 2…
Chr5	418183217	418184990	+	protein_id "XP_020167755.1"; description "dehydration-responsive element-binding protein 1H-like [Aegilops tauschii subsp. tauschii] e-value:8E-129"; pfam "AP2 domain (PF00847.17), No apical meristem-associated C-terminal domain (PF14303.3), No apical meristem-associated C-terminal domain (PF14303.3)"; homolog#1 "CDI59418.1 C-repeat binding factor [Triticum aestivum] e-value:2e-127,"; homolog#2 "…
Chr5	418211249	418212094	-	protein_id "XP_020167756.1"; description "dehydration-responsive element-binding protein 1H-like [Aegilops tauschii subsp. tauschii] e-value:5E-122"; pfam "AP2 domain (PF00847.17)"; homolog#1 "CDI59411.1 C-repeat binding factor [Triticum aestivum] e-value:2e-120,"; homolog#2 "CDI59408.1 C-repeat binding factor [Triticum aestivum] e-value:4e-119,"; homolog#3 "ABK55365.1 CBFIIId-12.1 [Triticum aest…
Chr5	418214728	418215362	-	protein_id "XP_020167743.1"; description "dehydration-responsive element-binding protein 1B-like [Aegilops tauschii subsp. tauschii] e-value:1E-22"; pfam "not assigned"; homolog#1 "BAF36843.1 CRT-binding factor [Lolium perenne] e-value:6e-27,"; homolog#2 "BAF36844.1 CRT-binding factor [Lolium perenne] e-value:4e-26,"; homolog#3 "AXE15768.1 CBF-like protein 4 [Deschampsia antarctica] e-value:2e-23…
Chr5	418247804	418248337	-	protein_id "XP_020167760.1"; description "dehydration-responsive element-binding protein 1B-like [Aegilops tauschii subsp. tauschii] e-value:7E-22"; pfam "AP2 domain (PF00847.17)"; homolog#1 "BAF36843.1 CRT-binding factor [Lolium perenne] e-value:2e-21,"; homolog#2 "AXE15768.1 CBF-like protein 4 [Deschampsia antarctica] e-value:4e-21,"; homolog#3 "BAF36844.1 CRT-binding factor [Lolium perenne] e-…
Chr5	418588785	418591123	+	protein_id "XP_020167758.1"; description "dehydration-responsive element-binding protein 1H-like [Aegilops tauschii subsp. tauschii] e-value:2E-112"; pfam "AP2 domain (PF00847.17), A distinct subfamily of CDD/CDA-like deaminases (PF14421.3), No apical meristem-associated C-terminal domain (PF14303.3), No apical meristem-associated C-terminal domain (PF14303.3), A distinct subfamily of CDD/CDA-lik…
Chr5	418642300	418642617	-	protein_id "XP_020167754.1"; description "dehydration-responsive element-binding protein 1H-like [Aegilops tauschii subsp. tauschii] e-value:1E-04"; pfam "not assigned"; homolog#1 "RCV12577.1 hypothetical protein SETIT_2G280200v2 [Setaria italica] e-value:9e-06,"; homolog#2 "AFR67788.1 AP2 domain CBF protein [Triticum aestivum] e-value:1e-05,"; homolog#3 "AAY32564.1 CRT/DRE binding factor 17 [Tri…
Chr5	418682979	418683831	-	protein_id "XP_020179850.1"; description "dehydration-responsive element-binding protein 1H-like [Aegilops tauschii subsp. tauschii] XP_020167750.1 dehydration-responsive element-binding protein 1H-like [Aegilops tauschii subsp. tauschii] e-value:3E-117"; pfam "AP2 domain (PF00847.17), No apical meristem-associated C-terminal domain (PF14303.3), No apical meristem-associated C-terminal domain (PF…
Chr5	418715456	418716299	-	protein_id "XP_020179849.1"; description "dehydration-responsive element-binding protein 1H-like [Aegilops tauschii subsp. tauschii] e-value:2E-125"; pfam "AP2 domain (PF00847.17)"; homolog#1 "ABK55363.1 CBFIIIc-D3 [Triticum aestivum] e-value:2e-125,"; homolog#2 "AAY32553.1 CRT/DRE binding factor 3 [Triticum monococcum] e-value:9e-113,"; homolog#3 "AFR67798.1 AP2 domain CBF protein [Triticum aest…
Chr5	418720539	418721372	-	protein_id "XP_020179851.1"; description "dehydration-responsive element-binding protein 1H-like [Aegilops tauschii subsp. tauschii] e-value:1E-111"; pfam "AP2 domain (PF00847.17)"; homolog#1 "AFR67784.1 AP2 domain CBF protein [Triticum aestivum] e-value:2e-111,"; homolog#2 "AGW47729.1 CBF10A [Hordeum vulgare subsp. vulgare] e-value:1e-91,"; homolog#3 "ABE02630.1 CBF3 [Hordeum vulgare subsp. vulg…
Chr5	418779534	418780449	-	protein_id "XP_020181566.1"; description "dehydration-responsive element-binding protein 1A-like [Aegilops tauschii subsp. tauschii] e-value:8E-104"; pfam "AP2 domain (PF00847.17)"; homolog#1 "ABK55360.1 CBFIIIa-D6 [Triticum aestivum] e-value:1e-103,"; homolog#2 "ABK55358.1 CBFIIIa-6.1 [Triticum aestivum] e-value:5e-98,"; homolog#3 "CBX87015.1 CBF1 protein [Aegilops biuncialis] e-value:5e-96,";
Chr5	530024937	530026572	-	protein_id "XP_020174667.1"; description "actin cytoskeleton-regulatory complex protein pan-1-like [Aegilops tauschii subsp. tauschii] e-value:2E-151"; pfam "AP2 domain (PF00847.17), pre-mRNA processing factor 3 (PRP3) (PF08572.7)"; homolog#1 "BAJ94384.1 predicted protein [Hordeum vulgare subsp. vulgare] BAJ88056.1 predicted protein [Hordeum vulgare subsp. vulgare] e-value:1e-101,"; homolog#2 "EM…
Chr5	547018752	547018923	-	protein_id "XP_020167743.1"; description "dehydration-responsive element-binding protein 1B-like [Aegilops tauschii subsp. tauschii] e-value:4E-22"; pfam "not assigned"; homolog#1 "AAY32562.1 CRT/DRE binding factor 4 [Triticum monococcum] e-value:1e-23,"; homolog#2 "AFR67796.1 AP2 domain CBF protein [Triticum aestivum] e-value:1e-23,"; homolog#3 "AFR67795.1 AP2 domain CBF protein [Triticum aestiv…
Chr6	186633098	186634851	+	protein_id "XP_020155037.1"; description "dehydration-responsive element-binding protein 1H-like [Aegilops tauschii subsp. tauschii] e-value:2E-92"; pfam "AP2 domain (PF00847.17)"; homolog#1 "AFR67782.1 AP2 domain CBF protein [Triticum aestivum] e-value:3e-92,"; homolog#2 "AFR67780.1 AP2 domain CBF protein [Triticum aestivum] e-value:6e-89,"; homolog#3 "AFR67781.1 AP2 domain CBF protein [Triticum…
Chr6	349223576	349225852	+	protein_id "XP_020194839.1"; description "ethylene-responsive transcription factor ERF038-like [Aegilops tauschii subsp. tauschii] e-value:4E-90"; pfam "AP2 domain (PF00847.17)"; homolog#1 "XP_010235787.1 ethylene-responsive transcription factor ERF038 [Brachypodium distachyon] KQK00604.1 hypothetical protein BRADI_3g50620v3 [Brachypodium distachyon] e-value:2e-39,"; homolog#2 "ALD84369.1 DREB1A …
Chr6	349255356	349257460	+	protein_id "XP_020194840.1"; description "ethylene-responsive transcription factor ERF038-like [Aegilops tauschii subsp. tauschii] e-value:9E-80"; pfam "AP2 domain (PF00847.17), Patatin-like phospholipase (PF01734.19)"; homolog#1 "BAJ86214.1 predicted protein [Hordeum vulgare subsp. vulgare] e-value:3e-67,"; homolog#2 "XP_003572772.1 ethylene-responsive transcription factor ERF038 [Brachypodium d…
Chr6	349442301	349444397	+	protein_id "XP_020194841.1"; description "ethylene-responsive transcription factor ERF039-like [Aegilops tauschii subsp. tauschii] e-value:9E-63"; pfam "AP2 domain (PF00847.17), Herpesvirus UL25 family (PF01499.13)"; homolog#1 "AAX23704.1 HvCBF7 [Hordeum vulgare subsp. vulgare] AAX23705.1 HvCBF7 [Hordeum vulgare subsp. vulgare] AAX23706.1 HvCBF7 [Hordeum vulgare subsp. vulgare] AAX28954.1 HvCBF7 …
Chr6	361354831	361356738	+	protein_id "XP_020193547.1"; description "dehydration-responsive element-binding protein 1G-like [Aegilops tauschii subsp. tauschii] e-value:2E-100"; pfam "AP2 domain (PF00847.17)"; homolog#1 "AFR67775.1 AP2 domain CBF protein [Triticum aestivum] e-value:3e-100,"; homolog#2 "AFR67776.1 AP2 domain CBF protein [Triticum aestivum] e-value:4e-99,"; homolog#3 "AFR67777.1 AP2 domain CBF protein [Tritic…
Chr6	412076036	412077725	-	protein_id "XP_020155853.1"; description "ethylene-responsive transcription factor RAP2-4-like [Aegilops tauschii subsp. tauschii] e-value:3E-138"; pfam "AP2 domain (PF00847.17), UPF0524 of C3orf70 (PF15823.2), UPF0524 of C3orf70 (PF15823.2)"; homolog#1 "ABC74512.1 DRF-like transcription factor DRFL2b [Triticum aestivum] e-value:4e-138,"; homolog#2 "AQQ11621.1 WXPL2D transcription factor [Triticu…
Chr6	476770908	476772648	+	protein_id "XP_020183304.1"; description "dehydration-responsive element-binding protein 1H-like [Aegilops tauschii subsp. tauschii] e-value:3E-119"; pfam "AP2 domain (PF00847.17)"; homolog#1 "AWT24552.1 C-repeat binding factor roughrider [Triticum aestivum] e-value:8e-117,"; homolog#2 "AAY32550.1 CRT/DRE binding factor 18 [Triticum monococcum] e-value:1e-115,"; homolog#3 "AWT24551.1 C-repeat bin…
Chr6	477263714	477264522	-	protein_id "XP_020176177.1"; description "dehydration-responsive element-binding protein 1H-like [Aegilops tauschii subsp. tauschii] e-value:2E-103"; pfam "AP2 domain (PF00847.17)"; homolog#1 "AWT24552.1 C-repeat binding factor roughrider [Triticum aestivum] e-value:5e-91,"; homolog#2 "AAY32550.1 CRT/DRE binding factor 18 [Triticum monococcum] e-value:1e-89,"; homolog#3 "AWT24551.1 C-repeat bindi…
Chr7	26876189	26878294	+	protein_id "XP_020162370.1"; description "dehydration-responsive element-binding protein 1C-like [Aegilops tauschii subsp. tauschii] e-value:7E-85"; pfam "AP2 domain (PF00847.17)"; homolog#1 "ABK55356.1 CBFII-5.2 [Triticum aestivum] e-value:1e-84,"; homolog#2 "AAX28963.1 TaCBF5 [Triticum aestivum] e-value:8e-84,"; homolog#3 "ABK55357.1 CBFII-5.3 [Triticum aestivum] e-value:4e-72,";
Chr7	26879912	26880918	-	protein_id "XP_020162373.1"; description "dehydration-responsive element-binding protein 1C-like [Aegilops tauschii subsp. tauschii] e-value:2E-115"; pfam "AP2 domain (PF00847.17)"; homolog#1 "ADK63190.1 drought responsive element binding transcription factor 3 [Triticum turgidum subsp. durum] e-value:4e-93,"; homolog#2 "AFR67779.1 AP2 domain CBF protein [Triticum aestivum] e-value:2e-83,"; homol…
Chr7	26884221	26884961	-	protein_id "XP_020162372.1"; description "dehydration-responsive element-binding protein 1C-like [Aegilops tauschii subsp. tauschii] e-value:2E-110"; pfam "AP2 domain (PF00847.17)"; homolog#1 "AFR67779.1 AP2 domain CBF protein [Triticum aestivum] e-value:4e-109,"; homolog#2 "ABC86564.1 AP2 domain transcription factor TaDREB3 [Triticum aestivum] e-value:3e-108,"; homolog#3 "ADK63190.1 drought resp…
Chr7	137617732	137619505	-	protein_id "XP_020148534.1"; description "ethylene-responsive transcription factor RAP2-13-like [Aegilops tauschii subsp. tauschii] e-value:2E-124"; pfam "AP2 domain (PF00847.17)"; homolog#1 "BAJ96243.1 predicted protein [Hordeum vulgare subsp. vulgare] e-value:4e-104,"; homolog#2 "XP_003564067.1 ethylene-responsive transcription factor RAP2-4 [Brachypodium distachyon] KQK18916.1 hypothetical pro…
Chr7	476059389	476060165	-	protein_id "XP_020193635.1"; description "ethylene-responsive transcription factor ERF039-like [Aegilops tauschii subsp. tauschii] e-value:7E-114"; pfam "AP2 domain (PF00847.17)"; homolog#1 "XP_003560670.2 dehydration-responsive element-binding protein 3 [Brachypodium distachyon] KQK18025.2 hypothetical protein BRADI_1g38110v3 [Brachypodium distachyon] e-value:4e-48,"; homolog#2 "XP_008659689.1 e…
Chr1	170571705	170575797	+	protein_id "XP_020185588.1"; description "B3 domain-containing protein Os03g0212300-like [Aegilops tauschii subsp. tauschii] e-value:8e-93,"; pfam "B3 DNA binding domain (PF02362.18), Dehydrin (PF00257.16)"; homolog#1 "AAM69851.1 unknown [Aegilops tauschii] e-value:6e-37,"; homolog#2 "SPT20093.1 unnamed protein product [Triticum aestivum] e-value:4e-36,"; homolog#3 "SPT20071.1 unnamed protein pro…
Chr1	391321253	391323871	-	protein_id "XP_020176770.1"; description "probable serine/threonine-protein kinase PBL25 [Aegilops tauschii subsp. tauschii] e-value:0.0,"; pfam "Protein tyrosine kinase (PF07714.14), Dehydrin (PF00257.16)"; homolog#1 "XP_010231282.3 probable serine/threonine-protein kinase PBL23 [Brachypodium distachyon] XP_024315981.1 probable serine/threonine-protein kinase PBL23 [Brachypodium distachyon] KQK0…
Chr1	400588576	400589704	-	protein_id "XP_020166692.1"; description "uncharacterized protein LOC109752199 [Aegilops tauschii subsp. tauschii] e-value:1e-85,"; pfam "Phosphatidylethanolamine-binding protein (PF01161.17)"; homolog#1 "BAC41494.1 cold regulated protein [Triticum aestivum] e-value:2e-85,"; homolog#2 "CAC12881.1 cold-regulated protein [Hordeum vulgare subsp. vulgare] BAJ92022.1 predicted protein [Hordeum vulgare…
Chr1	454751951	454753228	+	protein_id "XP_020173182.1"; description "late embryogenesis abundant protein, group 3 [Aegilops tauschii subsp. tauschii] e-value:7e-77,"; pfam "Late embryogenesis abundant protein (PF02987.13), Apolipoprotein A1/A4/E domain (PF01442.15), Late embryogenesis abundant protein (PF02987.13), Late embryogenesis abundant protein (PF02987.13), Late embryogenesis abundant protein (PF02987.13), Late embr…
Chr1	454812795	454814116	+	protein_id "XP_020173203.1"; description "ABA-inducible protein PHV A1-like [Aegilops tauschii subsp. tauschii] e-value:2e-86,"; pfam "Late embryogenesis abundant protein (PF02987.13), Apolipoprotein A1/A4/E domain (PF01442.15), Late embryogenesis abundant protein (PF02987.13), YtxH-like protein (PF12732.4), Late embryogenesis abundant protein (PF02987.13), YtxH-like protein (PF12732.4), Late emb…
Chr1	454824990	454826038	+	protein_id "XP_020173192.1"; description "ABA-inducible protein PHV A1-like [Aegilops tauschii subsp. tauschii] e-value:6e-65,"; pfam "Late embryogenesis abundant protein (PF02987.13), Apolipoprotein A1/A4/E domain (PF01442.15), Late embryogenesis abundant protein (PF02987.13), Mitochondrial inner membrane protein (PF09731.6), Late embryogenesis abundant protein (PF02987.13), Late embryogenesis a…
Chr1	454867453	454868750	+	protein_id "XP_020200916.1"; description "ABA-inducible protein PHV A1-like [Aegilops tauschii subsp. tauschii] e-value:2e-87,"; pfam "Late embryogenesis abundant protein (PF02987.13), Apolipoprotein A1/A4/E domain (PF01442.15), Late embryogenesis abundant protein (PF02987.13), Apolipoprotein A1/A4/E domain (PF01442.15), Late embryogenesis abundant protein (PF02987.13), Late embryogenesis abundan…
Chr1	454883750	454884250	+	protein_id "XP_020200903.1"; description "late embryogenesis abundant protein, group 3-like [Aegilops tauschii subsp. tauschii] e-value:0.010,"; pfam "not assigned"; homolog#1 "EMS54158.1 hypothetical protein TRIUR3_28535 [Triticum urartu] e-value:0.051,"; homolog#2 "ACH69969.1 Lea3, partial [Agropyron mongolicum] e-value:0.62,"; homolog#3 "AAN74638.1 LEA2 protein [Triticum aestivum] e-value:0.68…
Chr1	455041158	455042208	+	protein_id "XP_020200903.1"; description "late embryogenesis abundant protein, group 3-like [Aegilops tauschii subsp. tauschii] e-value:1e-102,"; pfam "Late embryogenesis abundant protein (PF02987.13), Late embryogenesis abundant protein (PF02987.13), Late embryogenesis abundant protein (PF02987.13), Apolipoprotein A1/A4/E domain (PF01442.15), Late embryogenesis abundant protein (PF02987.13), Lat…
Chr1	455079103	455080445	+	protein_id "XP_020200902.1"; description "ABA-inducible protein PHV A1-like [Aegilops tauschii subsp. tauschii] e-value:1e-112,"; pfam "Late embryogenesis abundant protein (PF02987.13), Late embryogenesis abundant protein (PF02987.13), Late embryogenesis abundant protein (PF02987.13), Late embryogenesis abundant protein (PF02987.13), Apolipoprotein A1/A4/E domain (PF01442.15), Bacterial protein o…
Chr2	535282251	535283224	-	protein_id "XP_020153776.1"; description "uncharacterized protein LOC109739104 [Aegilops tauschii subsp. tauschii] e-value:7e-77,"; pfam "Apolipophorin-III precursor (apoLp-III) (PF07464.8), Senescence-associated protein (PF06911.9), Apolipoprotein A1/A4/E domain (PF01442.15), Phasin protein (PF09361.7), Lambda phage tail tape-measure protein (Tape_meas_lam_C) (PF09718.7), Bacterial protein of un…
Chr2	565219571	565220732	-	protein_id "XP_020152868.1"; description "uncharacterized protein LOC109738180 [Aegilops tauschii subsp. tauschii] e-value:3e-118,"; pfam "Dehydrin (PF00257.16), Immortalisation up-regulated protein (PF15761.2), Dehydrin (PF00257.16), Immortalisation up-regulated protein (PF15761.2)"; homolog#1 "XP_004976830.1 uncharacterized protein LOC101759946 [Setaria italica] RCV35438.1 hypothetical protein …
Chr3	365147753	365148527	-	protein_id "XP_020199489.1"; description "dehydrin Rab25-like [Aegilops tauschii subsp. tauschii] e-value:1e-91,"; pfam "Dehydrin (PF00257.16), Nuclear RNA-splicing-associated protein (PF10500.6), Spt5 C-terminal nonapeptide repeat binding Spt4 (PF12815.4)"; homolog#1 "CDM83671.1 unnamed protein product [Triticum aestivum] e-value:7e-81,"; homolog#2 "ACE82292.1 dehydrin [Triticum aestivum] e-valu…
Chr3	394786288	394789188	-	protein_id "XP_020192827.1"; description "reticulon-like protein B1 [Aegilops tauschii subsp. tauschii] e-value:5e-169,"; pfam "Reticulon (PF02453.14), Dehydrin (PF00257.16)"; homolog#1 "CDM81762.1 unnamed protein product [Triticum aestivum] e-value:2e-159,"; homolog#2 "EMS49910.1 Reticulon-like protein B3 [Triticum urartu] e-value:8e-156,"; homolog#3 "BAJ98297.1 predicted protein [Hordeum vulgar…
Chr3	513506391	513507857	-	protein_id "XP_020172536.1"; description "cold shock protein CS66-like [Aegilops tauschii subsp. tauschii] e-value:3e-44,"; pfam "Dehydrin (PF00257.16), Dehydrin (PF00257.16), Dehydrin (PF00257.16), Dehydrin (PF00257.16)"; homolog#1 "AMQ77831.1 dehydrin [Triticum aestivum] e-value:5e-44,"; homolog#2 "CDM85326.1 unnamed protein product [Triticum aestivum] e-value:3e-37,"; homolog#3 "EMS58581.1 Deh…
Chr3	607025565	607026959	+	protein_id "XP_003573551.1"; description "uncharacterized protein LOC100836569 [Brachypodium distachyon] e-value:2e-04, "; pfam "Nuclear RNA-splicing-associated protein (PF10500.6), Dehydrin (PF00257.16), Coiled-coil domain-containing protein 106 (PF15794.2)"; homolog#1 "EMS46216.1 hypothetical protein TRIUR3_03609 [Triticum urartu] e-value:4e-16,"; homolog#2 "EMS35727.1 hypothetical protein TRIU…
Chr4	41617569	41619388	-	protein_id "XP_020191006.1"; description "dehydrin DHN4-like [Aegilops tauschii subsp. tauschii] e-value:5e-31,"; pfam "Dehydrin (PF00257.16), Dehydrin (PF00257.16), Dehydrin (PF00257.16), Transcription factor BRX N-terminal domain (PF13713.3), Transcription factor BRX N-terminal domain (PF13713.3), Transcription factor BRX N-terminal domain (PF13713.3)"; homolog#1 "EMS58683.1 Endoplasmic oxidore…
Chr4	493475999	493477488	-	protein_id "XP_020150225.1"; description "ABA-inducible protein PHV A1-like [Aegilops tauschii subsp. tauschii] e-value:5e-104,"; pfam "not assigned"; homolog#1 "AAB18208.1 cold acclimation protein WCOR615 [Triticum aestivum] EMS61758.1 hypothetical protein TRIUR3_22815 [Triticum urartu] e-value:5e-100,"; homolog#2 "AVO65137.1 cold responsive protein [Triticum aestivum] e-value:6e-98,"; homolog#3…
Chr4	493477540	493479378	-	protein_id "XP_020150224.1"; description "ABA-inducible protein PHV A1-like [Aegilops tauschii subsp. tauschii] e-value:1e-78,"; pfam "Apolipoprotein A1/A4/E domain (PF01442.15), Late embryogenesis abundant protein (PF02987.13), Protein of unknown function (DUF4449) (PF14613.3), Mitochondrial inner membrane protein (PF09731.6), Phasin protein (PF09361.7), Bacterial protein of unknown function (DU…
Chr5	76598315	76599800	+	protein_id "XP_020179172.1"; description "HVA22-like protein e [Aegilops tauschii subsp. tauschii] e-value:3e-23,"; pfam "not assigned"; homolog#1 "PNT63625.1 hypothetical protein BRADI_4g18820v3 [Brachypodium distachyon] e-value:3e-23,"; homolog#2 "XP_003577551.1 HVA22-like protein e [Brachypodium distachyon] KQJ88489.1 hypothetical protein BRADI_4g18820v3 [Brachypodium distachyon] e-value:4e-23…
Chr5	457602195	457602862	+	protein_id "XP_020155663.1"; description "dehydrin DHN2-like [Aegilops tauschii subsp. tauschii] e-value:2e-23, "; pfam "Dehydrin (PF00257.16), Dehydrin (PF00257.16)"; homolog#1 "AAX10956.1 dehydrin 1, partial [Hordeum vulgare subsp. spontaneum] AAX10960.1 dehydrin 1, partial [Hordeum vulgare subsp. spontaneum] AAX10961.1 dehydrin 1, partial [Hordeum vulgare subsp. spontaneum] AAX10966.1 dehydrin…
Chr5	457606538	457607470	+	protein_id "XP_020155660.1"; description "dehydrin DHN2 [Aegilops tauschii subsp. tauschii] e-value:2e-26,"; pfam "Dehydrin (PF00257.16)"; homolog#1 "AAF01690.1 dehydrin [Hordeum vulgare subsp. vulgare] e-value:2e-23,"; homolog#2 "P12952.1 Dehydrin DHN2; AltName: Full=B9 CAA33363.1 dehydrin [Hordeum vulgare subsp. vulgare] e-value:1e-20,"; homolog#3 "AAD02254.1 dehydrin 2 [Hordeum vulgare subsp. …
Chr5	457612536	457613454	+	protein_id "XP_020155665.1"; description "dehydrin DHN1 [Aegilops tauschii subsp. tauschii] e-value:1e-59,"; pfam "Dehydrin (PF00257.16)"; homolog#1 "AKP20510.1 dehydrin [Triticum aestivum] AOM63237.1 salt-induced YSK2 dehydrin 1 [Triticum aestivum] AWT24556.1 dehydrin 1 [Triticum aestivum] e-value:2e-59,"; homolog#2 "CAA50499.1 dehydrin 7 [Hordeum vulgare subsp. vulgare] e-value:7e-48,"; homolog…
Chr5	497577924	497578269	-	protein_id "XP_010235454.1"; description "dehydrin Rab16B [Brachypodium distachyon] e-value:0.005,"; pfam "Dehydrin (PF00257.16)"; homolog#1 "EMS59889.1 Dehydrin Rab15 [Triticum urartu] e-value:7e-06,"; homolog#2 "CAJ56059.1 dehydrin 1 [Triticum turgidum subsp. durum] e-value:3e-05,"; homolog#3 "Q00742.1 Dehydrin Rab15 CAA41850.1 rab [Triticum aestivum] e-value:4e-05,";
Chr5	497581138	497581385	-	protein_id "XP_020173003.1"; description "dehydrin Rab15-like [Aegilops tauschii subsp. tauschii] XP_020147293.1 dehydrin Rab15-like [Aegilops tauschii subsp. tauschii] e-value:7e-09,"; pfam "Dehydrin (PF00257.16)"; homolog#1 "Q00742.1 Dehydrin Rab15 CAA41850.1 rab [Triticum aestivum] e-value:2e-13,"; homolog#2 "AHC54479.1 Dehydrin 9, partial [Hordeum vulgare subsp. spontaneum] e-value:5e-12,"; h…
Chr5	497655116	497656003	-	protein_id "XP_020173003.1"; description "dehydrin Rab15-like [Aegilops tauschii subsp. tauschii] XP_020147293.1 dehydrin Rab15-like [Aegilops tauschii subsp. tauschii] e-value:5e-29,"; pfam "Dehydrin (PF00257.16), Dehydrin (PF00257.16)"; homolog#1 "CAA55194.1 dehydrin [Triticum turgidum subsp. durum] prf||2211422C dehydrin [Triticum turgidum subsp. durum] e-value:8e-26,"; homolog#2 "CAJ56055.1 d…
Chr5	497818993	497819983	-	protein_id "XP_020147292.1"; description "dehydrin Rab15-like [Aegilops tauschii subsp. tauschii] e-value:2e-28,"; pfam "Dehydrin (PF00257.16), Dehydrin (PF00257.16)"; homolog#1 "CAA55194.1 dehydrin [Triticum turgidum subsp. durum] prf||2211422C dehydrin [Triticum turgidum subsp. durum] e-value:2e-24,"; homolog#2 "CAJ56055.1 dehydrin 1 [Aegilops umbellulata] e-value:4e-24,"; homolog#3 "BAK03176.1…
Chr6	34935002	34936344	-	protein_id "XP_020189375.1"; description "dehydrin Rab15-like [Aegilops tauschii subsp. tauschii] e-value:1e-46,"; pfam "Dehydrin (PF00257.16), Dehydrin (PF00257.16)"; homolog#1 "CAJ56059.1 dehydrin 1 [Triticum turgidum subsp. durum] e-value:5e-23,"; homolog#2 "CAA55194.1 dehydrin [Triticum turgidum subsp. durum] prf||2211422C dehydrin [Triticum turgidum subsp. durum] e-value:2e-21,"; homolog#3 "…
Chr6	351747331	351748812	-	protein_id "XP_020189459.1"; description "dehydrin COR410 [Aegilops tauschii subsp. tauschii] e-value:3e-13,"; pfam "Dehydrin (PF00257.16)"; homolog#1 "AAB18201.1 cold acclimation protein WCOR410b [Triticum aestivum] e-value:3e-13,"; homolog#2 "AFP49819.1 LEA protein [Triticum turgidum subsp. durum] e-value:4e-13,"; homolog#3 "AGT95994.1 dehydrin WZY1-2 [Triticum aestivum] e-value:4e-13,";
Chr6	458286306	458287686	+	protein_id "XP_020149748.1"; description "cold-shock protein CS120 [Aegilops tauschii subsp. tauschii] e-value:4e-12,"; pfam "Dehydrin (PF00257.16), Dehydrin (PF00257.16), Dehydrin (PF00257.16), Dehydrin (PF00257.16), Dehydrin (PF00257.16), Transcription factor BRX N-terminal domain (PF13713.3), Transcription factor BRX N-terminal domain (PF13713.3), Transcription factor BRX N-terminal domain (PF…
Chr6	458493597	458505744	+	protein_id "XP_020158296.1"; description "cold shock protein CS66-like [Aegilops tauschii subsp. tauschii] e-value:4e-28,"; pfam "Dehydrin (PF00257.16)"; homolog#1 "CAA55193.1 dehydrin [Triticum turgidum subsp. durum] CAA55195.1 dehydrin [Triticum turgidum subsp. durum] CAJ56062.1 dehydrin 4, partial [Triticum turgidum subsp. durum] prf||2211422B dehydrin [Triticum turgidum subsp. durum] prf||221…
Chr6	458553239	458556377	+	protein_id "XP_020158295.1"; description "filaggrin-2-like [Aegilops tauschii subsp. tauschii] e-value:0.0,"; pfam "Dehydrin (PF00257.16)"; homolog#1 "EMS48364.1 Cold shock protein CS66 [Triticum urartu] e-value:2e-153,"; homolog#2 "ANN11756.1 WZY2-1 protein [Triticum aestivum] e-value:5e-152,"; homolog#3 "AAD02262.1 dehydrin 5 [Hordeum vulgare subsp. vulgare] e-value:5e-75,";
Chr6	458843987	458845331	+	protein_id "XP_020158297.1"; description "dehydrin DHN4-like [Aegilops tauschii subsp. tauschii] e-value:2e-14,"; pfam "Dehydrin (PF00257.16)"; homolog#1 "AOM63239.1 salt-induced YSK2 dehydrin 3 [Triticum aestivum] e-value:3e-14,"; homolog#2 "CAA44342.1 rab protein [Triticum aestivum] e-value:8e-12,"; homolog#3 "ABO14397.1 Dhn4 [Hordeum vulgare subsp. vulgare] e-value:2e-11,";
Chr6	459208830	459210052	+	protein_id "XP_020188297.1"; description "dehydrin DHN3 isoform X1 [Aegilops tauschii subsp. tauschii] e-value:6e-12,"; pfam "Dehydrin (PF00257.16), Dehydrin (PF00257.16)"; homolog#1 "EMS45466.1 Dehydrin DHN3 [Triticum urartu] e-value:2e-07,"; homolog#2 "ALL25871.1 Dehydrin3 [Hordeum vulgare subsp. spontaneum] e-value:2e-07,"; homolog#3 "P12948.1 Dehydrin DHN3; AltName: Full=B17 CAA33360.1 dehydr…
Chr6	459247630	459248760	+	protein_id "NP_001105419.1"; description "dehydrin DHN1 [Zea mays] e-value:2.1,"; pfam "Dehydrin (PF00257.16), Dehydrin (PF00257.16)"; homolog#1 "EMS45466.1 Dehydrin DHN3 [Triticum urartu] e-value:0.044,"; homolog#2 "CQR84593.1 boiling stable protein (WZYb), partial [Triticum aestivum] e-value:1.2,"; homolog#3 "EMS58581.1 Dehydrin DHN3 [Triticum urartu] e-value:1.8,";
Chr6	459261488	459262522	+	protein_id "XP_020188299.1"; description "dehydrin DHN3-like [Aegilops tauschii subsp. tauschii] e-value:3e-30,"; pfam "Dehydrin (PF00257.16), Dehydrin (PF00257.16)"; homolog#1 "AAC05922.1 dehydrin-/LEA group 2-like protein [Thinopyrum elongatum] e-value:2e-25,"; homolog#2 "CAJ56057.1 dehydrin 3, partial [Aegilops umbellulata] e-value:8e-20,"; homolog#3 "EMS45467.1 Dehydrin DHN3 [Triticum urartu]…
Chr6	459289544	459289819	-	protein_id "XP_020188298.1"; description "dehydrin DHN3 isoform X2 [Aegilops tauschii subsp. tauschii] e-value:0.001,"; pfam "Mucin-like glycoprotein (PF01456.14)"; homolog#1 "AGT62711.1 dehydrin 7 [Hordeum vulgare subsp. vulgare] e-value:3e-05,"; homolog#2 "BAK03269.1 predicted protein, partial [Hordeum vulgare subsp. vulgare] e-value:3e-05,"; homolog#3 "AAX14204.1 dehydrin 7 [Hordeum vulgare su…
Chr6	459310564	459311447	-	protein_id "XP_020188301.1"; description "dehydrin DHN3-like [Aegilops tauschii subsp. tauschii] e-value:4e-09, "; pfam "Dehydrin (PF00257.16), Dehydrin (PF00257.16)"; homolog#1 "CQR84593.1 boiling stable protein (WZYb), partial [Triticum aestivum] e-value:6.8, "; homolog#2 " e-value:"; homolog#3 " e-value:";
Chr6	459441621	459442744	-	protein_id "XP_020188302.1"; description "dehydrin DHN3-like [Aegilops tauschii subsp. tauschii] e-value:2e-22,"; pfam "Dehydrin (PF00257.16), Dehydrin (PF00257.16)"; homolog#1 "AOM63238.1 salt-induced YSK2 dehydrin 2 [Triticum aestivum] e-value:2e-19,"; homolog#2 "EMS68348.1 Dehydrin DHN3 [Triticum urartu] e-value:8e-17,"; homolog#3 "AOS59206.1 dehydrin WZY2 [Triticum aestivum] e-value:5e-16,";
Chr6	472940878	472942054	+	protein_id "XP_020165273.1"; description "auxin-responsive protein IAA9-like [Aegilops tauschii subsp. tauschii] e-value:2e-89,"; pfam "AUX/IAA family (PF02309.13), AUX/IAA family (PF02309.13), Dehydrin (PF00257.16), PB1 domain (PF00564.21)"; homolog#1 "BAJ97577.1 predicted protein [Hordeum vulgare subsp. vulgare] e-value:1e-60,"; homolog#2 "XP_004954274.1 auxin-responsive protein IAA9 [Setaria i…
Chr7	185860421	185861705	+	protein_id "XP_020174132.1"; description "protein HVA22 isoform X1 [Aegilops tauschii subsp. tauschii] e-value:2e-90,"; pfam "TB2/DP1, HVA22 family (PF03134.16)"; homolog#1 "BAC80265.1 hypothetical protein [Triticum aestivum] e-value:2e-89,"; homolog#2 "EMS45146.1 hypothetical protein TRIUR3_21112 [Triticum urartu] e-value:2e-89,"; homolog#3 "Q07764.1 Protein HVA22 AAA16094.1 A22 [Hordeum vulgare…
Chr7	623575903	623579302	+	protein_id "XP_020180200.1"; description "NEP1-interacting protein 1-like [Aegilops tauschii subsp. tauschii] XP_020169379.1 NEP1-interacting protein 1-like [Aegilops tauschii subsp. tauschii] e-value:1e-140,"; pfam "Ring finger domain (PF13639.3), YMGG-like Gly-zipper (PF13441.3), Vacuolar sorting protein 39 domain 2 (PF10367.6), Dehydrin (PF00257.16), YMGG-like Gly-zipper (PF13441.3), Vacuolar …
Chr7	641408076	641409005	+	protein_id "XP_020174486.1"; description "cold-shock protein CS120-like [Aegilops tauschii subsp. tauschii] e-value:4e-50,"; pfam "Dehydrin (PF00257.16), Dehydrin (PF00257.16), Transcription factor BRX N-terminal domain (PF13713.3), Transcription factor BRX N-terminal domain (PF13713.3), Collagen triple helix repeat (20 copies) (PF01391.15), Transcription factor BRX N-terminal domain (PF13713.3)"…
Chr1	320490758	320490564	-	protein_id "not assigned"; note "partial";
Chr5	457435972	457437144	-	protein_id "XP_020193365.1"; description "phytosulfokine receptor 2-like [Aegilops tauschii subsp. tauschii] e-value:0.0,"; pfam "Leucine rich repeat (PF13855.3), Leucine rich repeat N-terminal domain (PF08263.9), Leucine rich repeat (PF13855.3)"; homolog#1 "EMS51613.1 Phytosulfokine receptor 1 [Triticum urartu] e-value:0.0,"; homolog#2 "EMS67025.1 Phytosulfokine receptor 1 [Triticum urartu] e-va…
Chr5	554994939	554996034	+	protein_id "XP_020160091.1"; description "phytosulfokine receptor 1-like [Aegilops tauschii subsp. tauschii] e-value:5e-154,"; pfam "Leucine rich repeat (PF13855.3), Leucine rich repeat N-terminal domain (PF08263.9), Leucine rich repeat (PF13855.3), Leucine Rich Repeat (PF00560.30)"; homolog#1 "ANC70258.1 ice recrystallization inhibition protein IRI7 [Triticum aestivum] e-value:3e-152,"; homolog#…
Chr5	554999753	555000934	+	protein_id "XP_020160092.1"; description "receptor-like protein 2 [Aegilops tauschii subsp. tauschii] e-value:3e-125,"; pfam "Leucine rich repeat (PF13855.3), Leucine rich repeat N-terminal domain (PF08263.9), Leucine Rich Repeat (PF00560.30), Leucine Rich Repeat (PF00560.30)"; homolog#1 "ANC70257.1 ice recrystallization inhibition protein IRI6 [Triticum aestivum] e-value:2e-122,"; homolog#2 "ANC…
Chr5	555027034	555028156	+	protein_id "XP_020194866.1"; description "tyrosine-sulfated glycopeptide receptor 1-like [Aegilops tauschii subsp. tauschii] XP_020160097.1 tyrosine-sulfated glycopeptide receptor 1-like [Aegilops tauschii subsp. tauschii] e-value:1e-142,"; pfam "Leucine rich repeat (PF13855.3), Leucine rich repeat N-terminal domain (PF08263.9), Immunogenic region of nsp2 protein of arterivirus polyprotein (PF147…
Chr5	555039063	555040319	+	protein_id "XP_020194857.1"; description "probable inactive receptor kinase At3g02880 [Aegilops tauschii subsp. tauschii] XP_020160096.1 probable inactive receptor kinase At3g02880 [Aegilops tauschii subsp. tauschii] e-value:5e-127,"; pfam "Leucine rich repeat (PF13855.3), Leucine rich repeat N-terminal domain (PF08263.9), Immunogenic region of nsp2 protein of arterivirus polyprotein (PF14757.3),…
Chr5	555051259	555052503	+	protein_id "XP_020194857.1"; description "probable inactive receptor kinase At3g02880 [Aegilops tauschii subsp. tauschii] XP_020160096.1 probable inactive receptor kinase At3g02880 [Aegilops tauschii subsp. tauschii] e-value:1e-95,"; pfam "Leucine rich repeat (PF13855.3), Leucine rich repeat N-terminal domain (PF08263.9), Leucine Rich Repeat (PF00560.30), Leucine Rich Repeat (PF00560.30)"; homolo…
Chr5	555158722	555160604	+	protein_id "XP_020160101.1"; description "DNA damage-repair/toleration protein DRT100-like [Aegilops tauschii subsp. tauschii] e-value:0.0,"; pfam "Leucine rich repeat (PF13855.3), Leucine rich repeat (PF13855.3), Leucine rich repeat (PF13855.3), Leucine rich repeat N-terminal domain (PF08263.9), Leucine rich repeat N-terminal domain (PF08263.9), Leucine rich repeat N-terminal domain (PF08263.9)"…
Chr5	555275235	555277089	+	protein_id "XP_020160094.1"; description "LRR receptor-like serine/threonine-protein kinase FLS2 [Aegilops tauschii subsp. tauschii] e-value:0.0,"; pfam "Leucine rich repeat (PF13855.3), Leucine rich repeat (PF13855.3), Leucine rich repeat (PF13855.3), Leucine rich repeat N-terminal domain (PF08263.9), Leucine Rich Repeat (PF00560.30), Leucine Rich repeats (2 copies) (PF12799.4), Leucine rich rep…
Chr5	555313220	555314499	+	protein_id "XP_020160090.1"; description "phytosulfokine receptor 1-like [Aegilops tauschii subsp. tauschii] e-value:5e-117,"; pfam "Leucine rich repeat (PF13855.3), Leucine Rich Repeat (PF00560.30), Leucine rich repeat (PF13855.3)"; homolog#1 "AAX81543.1 ice recrystallization inhibition protein 2 precursor [Triticum aestivum] e-value:2e-107,"; homolog#2 "EMS65660.1 Phytosulfokine receptor 2 [Tri…
Chr5	555504051	555505628	+	protein_id "XP_020147659.1"; description "probable LRR receptor-like serine/threonine-protein kinase At4g36180 [Aegilops tauschii subsp. tauschii] e-value:0.0,"; pfam "Leucine Rich repeats (2 copies) (PF12799.4), Leucine rich repeat N-terminal domain (PF08263.9), Leucine rich repeat (PF13855.3), Leucine rich repeat (PF13855.3), Leucine rich repeat (PF13855.3)"; homolog#1 "EMS51680.1 Phytosulfokin…
Chr5	555525929	555527771	+	protein_id "XP_020147660.1"; description "phytosulfokine receptor 2-like [Aegilops tauschii subsp. tauschii] e-value:0.0,"; pfam "Leucine rich repeat (PF13855.3), Leucine rich repeat (PF13855.3), Leucine rich repeat N-terminal domain (PF08263.9), Nuclear envelope localisation domain (PF10541.6), Leucine Rich repeats (2 copies) (PF12799.4), Leucine Rich Repeat (PF00560.30)"; homolog#1 "EMS51680.1 …
Chr5	555582937	555584341	+	protein_id "XP_020196935.1"; description "phytosulfokine receptor 2-like [Aegilops tauschii subsp. tauschii] XP_020167513.1 phytosulfokine receptor 2-like [Aegilops tauschii subsp. tauschii] e-value:0.0,"; pfam "Leucine rich repeat (PF13855.3), Leucine rich repeat (PF13855.3), Leucine Rich repeats (2 copies) (PF12799.4), Leucine rich repeat N-terminal domain (PF08263.9)"; homolog#1 "EMS51680.1 Ph…
Chr5	575595898	575597218	-	protein_id "XP_020184156.1"; description "phytosulfokine receptor 2-like [Aegilops tauschii subsp. tauschii] e-value:0.0,"; pfam "Leucine rich repeat (PF13855.3), Leucine rich repeat N-terminal domain (PF08263.9), Leucine Rich repeat (PF13516.3), Leucine Rich Repeat (PF00560.30), Leucine Rich repeats (2 copies) (PF12799.4)"; homolog#1 "EMS67025.1 Phytosulfokine receptor 1 [Triticum urartu] e-valu…
Chr5	575601267	575600153	-	protein_id "XP_020184156.1"; description "phytosulfokine receptor 2-like [Aegilops tauschii subsp. tauschii] e-value:0.0,"; pfam "Leucine rich repeat (PF13855.3), Leucine rich repeat N-terminal domain (PF08263.9), Leucine rich repeat (PF13855.3), Leucine Rich repeat (PF13516.3)"; homolog#1 "EMS67025.1 Phytosulfokine receptor 1 [Triticum urartu] e-value:4e-157,"; homolog#2 "EMS51613.1 Phytosulfoki…

## Sheet: Gu
Gene	Chromosome	Start	End	Strand	Annotation
Omega1	Chr1	4384161	4385243	+	pesudo
Omega2	Chr1	4404811	4405938	+	intact
Gamma1	Chr1	4838060	4838970	+	pesudo
Delta1	Chr1	4885819	4886796	+	intact
Delta2	Chr1	4911550	4912372	+	pesudo
Gamma2	Chr1	4916390	4917360	+	pesudo
Gamma3	Chr1	4956356	4957252	+	intact
Gamma4	Chr1	4963519	4964409	+	intact
Omega3	Chr1	5016619	5017642	-	stop at very end
Omega4	Chr1	5028972	5030106	-	pesudo
Omega5	Chr1	5062996	5064109	-	gap (sequence with 613N)
Omega6	Chr1	5070268	5070597	-	frag
LMW1	Chr1	5101935	5103001	-	pesudo
LMW2	Chr1	5116746	5117663	-	intact
LMW3	Chr1	6205905	6206762	-	intact
LMW4	Chr1	6466508	6467557	+	intact
LMW5	Chr1	6675926	6676846	+	intact
HMWDX	Chr1	419196971	419199535	-	intact
HMWDY	Chr1	419253961	419255937	-	intact
alpha1	Chr6	27854279	27855142	+	intact
alpha2	Chr6	27906470	27906717	+	frag
alpha3	Chr6	27914253	27915107	+	intact
alpha4	Chr6	27985598	27986442	+	pesudo
alpha5	Chr6	28027019	28027924	+	intact
alpha6	Chr6	28052398	28053291	+	intact
alpha7	Chr6	28075207	28076049	+	intact
alpha8	Chr6	28099477	28100340	+	intact
alpha9	Chr6	28131318	28132181	+	intact
alpha10	Chr6	28132358	28132606	+	frag
alpha11	Chr6	28154137	28154991	+	pesudo
alpha12	Chr6	28286838	28288121	+	pesudo
alpha13	Chr6	28436994	28437853	+	pesudo

## Sheet: Gulick
Chr	Start	End	Strand	Name	Description	GenBank Accession NR	Reference	Annotated by
Chr1	44968490	44968211	-	Esi3-9	Early Salt Induced 3-9/Rci2/Pmp3	XM_020304418.1	Brunetti et al. 2018	Patrick J. Gulick
Chr1	54788966	54795913	+	Pi-PLC2	Phosphoinositol Phospholipase C 2	XM_020306815.1		Patrick J. Gulick
Chr1	69580865	69580507	-	Esi3-5	Early Salt Induced 3-5/Rci2/Pmp3	XM_020319125.1	Brunetti et al. 2018	Patrick J. Gulick
Chr1	263758541	263757105	-	Adf10	actin-depolymerizing factor 10	XM_020291602.1	ND	Patrick J. Gulick
Chr1	424888499	424885772	-	Rop5	Rop/Rac GTPase 5	XM_020307499.1		Patrick J. Gulick
Chr1	433101601	433103302	+	Rop2	Rop/Rac GTPase 2	XM_020313725.1		Patrick J. Gulick
Chr1	444926276	444928548	+	A-TUB2	alpha tubulin 2	XM_020303413.1	Ridha Farajalla et al. 2008	Patrick J. Gulick
Chr2	36474628	36478110	+	Pi-PLC1	Phosphoinositol Phospholipase C 1	XM_020297132.1	Khalil et al. 2011	Patrick J. Gulick
Chr2	102024138	102023825	-	Esi3-6	Early Salt Induced 3-6/Rci2/Pmp3	XM_020343337.1	Brunetti et al. 2018	Patrick J. Gulick
Chr2	199204333	199202099	-	Esi47	Early salt stress induced 47, protein kinase	XM_020292358.1	Gulick and Dvorak, 1992	Patrick J. Gulick
Chr2	468485544	468483560	-	Clo2	Caleosin 10-1	XM_020300020.1	Khalil et a. 2014	Patrick J. Gulick
Chr2	468499448	468497363	-	Clo3	Caleosin 10-2	XM_020321231.1	Khalil et a. 2014	Patrick J. Gulick
Chr2	468569761	468567135	-	Clo4	Caleosin 11	XM_020323477.1	Khalil et a. 2014	Patrick J. Gulick
Chr2	636335291	636334762	-	ESI3-10	Early Salt Induced 3-10/Rci2/Pmp3	XM_020312949.1	Brunetti et al. 2018	Patrick J. Gulick
Chr2	155582261	155579538	-	A-TUB1	alpha tubulin 1	XM_020296497.1	Ridha Farajalla et al. 2007	Patrick J. Gulick
Chr2	468423690	468422308	-	Clo1	Caleosin 1	XM_020301266.1	Khalil et a. 2014	Patrick J. Gulick
Chr2	484817064	484818369	+	Clo5	Caleosin 2	XM_020314505.1	Khalil et a. 2014	Patrick J. Gulick
Chr2	650408846	650410972	+		pseudogene - heterotrimeric G protein alpha subunit			Patrick J. Gulick
Chr3	135087179	135085813	-	Rop1	Rop/Rac GTPase 1	XM_020336367.1		Patrick J. Gulick
Chr3	396549815	396552464	+	Clo6-2	Caleosin 4	XM_020314509.1	Khalil et a. 2014	Patrick J. Gulick
Chr3	601076748	601072433	-	PLC3	non specific Phospholipase C3	XM_020296363.1		Patrick J. Gulick
Chr3	625658941	625658456	-		pseudogene - heterotrimeric G protein alpha subunit			Patrick J. Gulick
Chr4	5380347	5378686	-	PLC2	non specific Phospholipase C2	XM_020318195.1		Patrick J. Gulick
Chr4	6820467	6825454	+	Gb1	Heterotrimeric G protein beta subunit	XM_020325500.1		Patrick J. Gulick
Chr4	34630482	34632918	+	A-TUB3	alpha tubulin 3	XM_020292005.1	Ridha Farajalla et al. 2009	Patrick J. Gulick
Chr4	347309051	347305639	-	Pi-PLC4	Phosphoinositol Phospholipase C 4	XM_020321544.1		Patrick J. Gulick
Chr4	350515483	350515742	+	Esi3-1	Early Salt Induced 3-1/Rci2/Pmp3	XM_020295004.1	Brunetti et al. 2018	Patrick J. Gulick
Chr4	350536299	350536562	+	Esi3-3	Early Salt Induced 3-3/Rci2/Pmp3	XM_020312948.1	Brunetti et al. 2018	Patrick J. Gulick
Chr4	411000101	410998000	-	Clo11	Caleosin 9	XM_020301220.1	Khalil et a. 2014	Patrick J. Gulick
Chr4	412778087	412778194	+		pseudogene - alpha tubulin 5 -like			Patrick J. Gulick
Chr4	412778237	412780982	+	A-TUB5	alpha tubulin 5	XM_020291776.1	Ridha Farajalla et al. 2011	Patrick J. Gulick
Chr5	5451630	5451064	-		pseudogene, PLC like fragment			Patrick J. Gulick
Chr5	255953560	255958205	+	Pi-PLC3	Phosphoinositol Phospholipase C 3	XM_020315799.1		Patrick J. Gulick
Chr5	332671864	332668910	-	Gg4	Heterotrimeric G protein gamma 4 subunit	XM_020298538.1		Patrick J. Gulick
Chr5	451864650	451865849	+	Esi3-4	Early Salt Induced 3-4/Rci2/Pmp3	XM_020334898.1	Brunetti et al. 2018	Patrick J. Gulick
Chr5	451921295	451921592	+	Esi3-2	Early Salt Induced 3-2/Rci2/Pmp3	XM_020295016.1	Brunetti et al. 2018	Patrick J. Gulick
Chr5	465011336	465014523	+	Gg1	Heterotrimeric G protein gamma 1 subunit	XM_020345933.1		Patrick J. Gulick
Chr5	488405376	488407530	+	A-TUB4	alpha tubulin 4	XM_020309759.1	Ridha Farajalla et al. 2010	Patrick J. Gulick
Chr5	535888016	535888582	+	Esi28	Early salt stress induced 28/ actin depolymerizing protein	XM_020342847.1	Gulick and Dvorak, 1994	Patrick J. Gulick
Chr5	541354898	541351674	-	PLC1	non specific Phospholipase C1	XM_020306264.1		Patrick J. Gulick
Chr6	84389064	84394214	+	Gg2	Heterotrimeric G protein gamma 2 subunit	XM_020321987.1		Patrick J. Gulick
Chr6	146976561	146979198	+	Clo6-1	Caleosin 3	XM_020314517.1	Khalil et a. 2014	Patrick J. Gulick
Chr6	351748629	351747738	-	Esi35	Early salt stress induced 35/dehydrin 8/cor410/Lea D-11	XM_020333870.1	Gulick and An, 1993	Patrick J. Gulick
Chr6	408603469	408601728	-	Clo8-2	Caleosin 6-2	XM_020322540.1	Khalil et a. 2014	Patrick J. Gulick
Chr6	408758682	408760015	+	Clo8-1	Caleosin 6-1	XM_020322545.1	Khalil et a. 2014	Patrick J. Gulick
Chr6	408803823	408805536	+	Clo7	Caleosin 5	XM_020322538.1	Khalil et a. 2014	Patrick J. Gulick
Chr6	421330986	421333643	+	Rop3	Rop/Rac GTPase 3	XM_020329561.1		Patrick J. Gulick
Chr6	458286390	458287565	+	Esi18	Early salt stress induced 2/cold induced 2	XM_020294159.1	Gulick and Dvorak, 1993	Patrick J. Gulick
Chr6	458553313	458556055	+	ND	Dehydrin 5/Cold shock protein/filaggrin-2-like	XM_020302706.1	ND	Patrick J. Gulick
Chr7	6364240	6366584	+	Gg3	Heterotrimeric G protein gamma 3 subunit	XM_020343714.1		Patrick J. Gulick
Chr7	49672212	49672110	-		pseudogene - heterotrimeric G protein alpha subunit			Patrick J. Gulick
Chr7	101287904	101287578	-	Esi3-8	Early Salt Induced 3-8/Rci2/Pmp3	XM_020322478.1	Brunetti et al. 2018	Patrick J. Gulick
Chr7	148556135	148559707	+	Rop4	Rop/Rac GTPase 4	XM_020320069.1		Patrick J. Gulick
Chr7	164000821	163997618	-	Clo9	Caleosin 7	XM_020307771.1	Khalil et a. 2014	Patrick J. Gulick
Chr7	164118485	164116836	-	Clo10-1	Caleosin 8-1	XM_020301223.1	Khalil et a. 2014	Patrick J. Gulick
Chr7	164162730	164160798	-	Clo10-2	Caleosin 8-2	XM_020301222.1	Khalil et a. 2014	Patrick J. Gulick
Chr7	423741686	423741489	-		pseduogene - phosphoinositide phospholipase C, PLC4 -like			Patrick J. Gulick
Chr7	565332511	565333676	+	Esi2	Early salt stress induced 18/COR39/Cold shock 19	XM_020333238.1	Gulick and Dvorak, 1992	Patrick J. Gulick
Chr7	606128565	606128209	-	Esi3-7	Early Salt Induced 3-7/Rci2/Pmp3	XM_020295721.1	Brunetti et al. 2018	Patrick J. Gulick

## Sheet: Nelson
chromosome	begin	strand		seq ID	best hit	%ID	aln length
chr1	199119	-1		chr1_199119_-1	CYP72A581_1D_Triticum_aestivum(wheat)	100	60	KEVWGADADEFRPERFSGGISNASMAGSPAFFPFGWGPRVCIGQNFALLEAKMGLAVILR
chr1	204868	-1		chr1_204868_-1	CYP72A580_1D_Triticum_aestivum(wheat)	98.31	59	PLLCVHHDKEVWGADADKFRPERFSEGISKASADAPAFFPFGWGPRVCIGQNFALLEAK
chr1	682453	1		chr1_682453_1	CYP92A155_5B_Triticum_aestivum(wheat)	89.83	59	RLDVKGQDYELLPFGSGRRMCPGYNLGLKVIQLSLANLLHGFVWSLPDDMELSMEEIFG
chr1	2534003	1		chr1_2534003_1	CYP93G2_Hordeum_vulgare_v1.0	94.83	58	VGEPDVAQMPYLQAVLKETLRLRPPAVFAQREAMQPIHVRGYTIPVKTSVFFNIFTIG
chr1	6013445	1		chr1_6013445_1	CYP71C141_1B_Triticum_aestivum(wheat)	90	60	TSSQTLEFTLVELVKRPHMMWKLQDEVRSNIIHRGEGAFTKVNHNSMIYLKAIIKESLRL
chr1	8960081	-1		chr1_8960081_-1	CYP71E48_5B_Triticum_aestivum(wheat)	90	60	MVVKETLRLHPPAPLLVPRETMRHIQISGYDIPAKTRIYVNAWAIGRDQASWPEHPEEFN
chr1	9756450	1		chr1_9756450_1	CYP84A99_1D_Triticum_aestivum(wheat)	100	60	KETLRLHPPIPLLHRENAEDCVVGSYSVPRGSSVNINVFAMGRDARVWKDADTFRPSRFM
chr1	10364300	-1		chr1_10364300_-1	CYP93G18_2B_Triticum_aestivum(wheat)	86.67	60	ETLRLHPAAPIAHRQSTEEIEVDAGGGFTVPAGTVVFINLWSIGRDPAYWDAPLEFRPER
chr1	11048201	-1		chr1_11048201_-1	CYP71F19_1B_Triticum_aestivum(wheat)	98.33	60	MVIKETLRLHPPISLIPRSAREDCTVMGYDIPKGTNIYINAVAISQDPKYWDNPREFRPE
chr1	11825688	-1		chr1_11825688_-1	CYP71BU10_1D_Triticum_aestivum(wheat)	100	59	VIINAWAIGRDPHTWESPMEFRPERFIGSEVSFRGRHFQLIPFGSGRRMCPGINFTMSI
chr1	15722212	-1		chr1_15722212_-1	CYP71C140_1D_Triticum_aestivum(wheat)	83.33	60	NAQEFVPERFMEGAMDAACDFKGNDFCYLLFGSGQKICPGITFAAVIFEIILANLIYHFN
chr1	15764434	1		chr1_15764434_1	CYP71C140_1D_Triticum_aestivum(wheat)	100	60	MRLHPSGALLIPHLSVAECDVEGYTIPSGTRLMVNAWALGRDPTCWENAEEFMPERFMEG
chr1	17099571	1		chr1_17099571_1	CYP93G2_Hordeum_vulgare_v1.0	90.57	53	RDVTWWEEPLEFRPERFMPGGAGEDVDPKGQHLQLMPFGSGRRACPGMGLAMQ
chr1	18050689	-1	CYP51	chr1_18050689_-1	CYP51G3_2B_Triticum_aestivum(wheat)	85	60	MELTRVLWLASFPIFVTIVLIEMARRRATFSLTTKQSPPPPPMATGAPLLGILLALHTKGPLQVIRDTHAEMGSVFTVRLLHRKVTFLVGPDVSSHFFQGLDSEISQDQVSQFTIPTFGPGVAFDVDFATRREQFRFFGDAMKPAKLRTYARLMVQEVEDFFAKWGPTGTVDLKQELEHLVTLVASRCLFGEEVRAKMLAEVATHLRELNDGMRLVTILFPHLQIPAHRRRDTARARLDEIFSGIVSSRKTSYPDGGPNDMLQCLIDSRYKDGRATTKTEVVGMLVSALFAGQQTSSSTGTARANANHLHAAVQEQERIMERHGDRVDYEVLQEMETLHRCIKEVLRLHPPAMMLLRHARRSFTVQTKDGDVYEVPEGRTVASPLVIHNRLPHVYRDPE…
chr1	30692884	-1		chr1_30692884_-1	CYP76P15_1D_Triticum_aestivum(wheat)	100	60	KETLRLHAVVPLVPNKAEATVKIQGHTVPKGSTVLVNVWAVHHDAEAWPEPNKFIPERFL
chr1	31929550	-1		chr1_31929550_-1	CYP84A101_1D_Triticum_aestivum(wheat)	100	60	ETLRLHPPFPLLHHETAEDCVVGGYSVPQGSRVMINVFAIGRDAKAWKDADTFRPSRFMP
chr1	32288142	1		chr1_32288142_1	CYP84A102_1D_Triticum_aestivum(wheat)	100	60	ETLRLHPPFPLLHNETAEDCVVGGYSVPRGSRVMINVFAMGRDAKAWKGADTFRPSRFMP
chr1	63530112	-1		chr1_63530112_-1	CYP76V5_1D_Triticum_aestivum(wheat)	100	52	KETLRLHPPVPFATGLAEEAVEIEGYNVPKGTTALVNIWGICRNAEVWDEPN
chr1	90496567	1		chr1_90496567_1	CYP71C139_1D_Triticum_aestivum(wheat)	98.33	60	YLKAVVKETLRLHPPAPLLLPHLAIADCDLDGYSIPSETRVIINAWAIGRDPGYWDKPDD
chr1	108814306	-1		chr1_108814306_-1	CYP72A582_1D_Triticum_aestivum(wheat)	100	53	FSYIYIQMTMILYEVLRLYTPVVTMNRKISKEMQIGGVTYPAGTVLELPFLMVHHNPDVW
chr1	124079952	1		chr1_124079952_1	CYP96D2	86.21	58	YRPERWLSGSGRVRHQPSYKFAAFNCGPRSCLGKDLGLINLKIAAAAIIYNFRVELVD
chr1	229231289	-1		chr1_229231289_-1	CYP86B43_1D_Triticum_aestivum(wheat)	100	82	VNFILAGRDTSSVALAWFFWLLSKNRGVEAKILQEVEGIVAARGRCGEVEEELVFQPEEVKRMEYLHAALSEALRLYPSVPV
chr1	242805781	1		chr1_242805781_1	CYP71T43_1B_Triticum_aestivum(wheat)	98.31	59	ATWERPDEFWPERFLDSSVDFRGQDFELLPFGAGRRGCPGIGFAMSTLEMAIASLLHRF
chr1	243286292	-1		chr1_243286292_-1	CYP71T42_1D_Triticum_aestivum(wheat)	100	60	PTPLLLPRETVEDTQLLGYHVPAGTRVLIHAWAIGRDPATWGDRAEEFVPERFLEYTHEV
chr1	256066734	-1		chr1_256066734_-1	CYP89B32_1D_Triticum_aestivum(wheat)	100	60	GGYMIPKGATVNFMVAEMGRDEREWQRPLEFSPERFLPGGAGEAVDVTGNREIKMMPFGV
chr1	256377952	-1		chr1_256377952_-1	CYP89B34_1A_Triticum_aestivum(wheat)	98.33	60	GGAGEAVDVTGNREIKMMPFGVGRRICAGLGIAMLHLEYFVANMVREFEWEEVAGEEVDF
chr1	256432459	-1		chr1_256432459_-1	CYP89B36_1B_Triticum_aestivum(wheat)	100	60	GYLIPKGATVNFMVAEMGRDEREWEKPMEFVPERFLPGGDGEGVDVAGSREIRMMPFGVG
chr1	257200521	1		chr1_257200521_1	CYP84A97_1D_Triticum_aestivum(wheat)	98.33	60	ETLRLHPPIPLLLHETAEDCVVGGYSVPRGSRVMINVFAIGRDAKAWKDPDTFRPSRFMA
chr1	268040438	-1		chr1_268040438_-1	CYP704A158_1B_Triticum_aestivum(wheat)	100	49	KIVRNFCWVFQDNKECFSDDVLPNGFSVGKGDMVFYAPYAMGRMERLWGEDAQVFRPERW
chr1	301723423	1		chr1_301723423_1	CYP97C2_Oryza_sativa	96.55	58	IVPRQIKAEKAVNTIRNTVEDLITKCKAIVDAENEQIEGEEYVNEADPSILRFLLASR
chr1	335018441	1		chr1_335018441_1	CYP94E10_1D_Triticum_aestivum(wheat)	100	60	GWFANYSAYAMGRMEKLWGENFLEFAPERWLGDSGEFAPVDAARYPVFHAGPRACLGKEM
chr1	337818658	-1		chr1_337818658_-1	CYP71R12_1D_Triticum_aestivum(wheat)	100	52	AAMKEALRLHPPIPLFPHESIQNTRLHGYDIPAKTRIMINAWAIGRDSESWE
chr1	339407886	-1		chr1_339407886_-1	CYP71X30_1D_Triticum_aestivum(wheat)	98.33	60	MRLHPAAPLLLPREASEPCKILGYDVPEGTTMLVNAWAIGRDPRHWEDPEEFKPERFESG
chr1	342676984	1		chr1_342676984_1	CYP71K38_1D_Triticum_aestivum(wheat)	98.33	60	LDLVIKEVLRLHPPATMLLPRECRAPCRILGFDVPAGAMVLVNAWAIGRDPAHWDSSEEF
chr1	350903250	1		chr1_350903250_1	CYP721B10_1A-fragment_Triticum_aestivum(wheat)	93.33	60	AEEFDPSRFADGKSYHLGAYFPFGIGPAICVGQNLAIVEAKLVIAMVLQRFVLDVSPSYV
chr1	350918794	-1		chr1_350918794_-1	CYP721B12_1D_Triticum_aestivum(wheat)	100	59	QVNMVLKETLRLYPPALFINRTVTRDVKLGKLDIPAGTQLNLPIIDIHHDVDIWGANADE
chr1	350923079	-1		chr1_350923079_-1	CYP721B-frgament_1D_Triticum_aestivum(wheat)	100	59	QVNMVLKETLRLYPPALFVNRTFTRDVKLGKLDIPAGTQLNMPIIEMHHDVNIWGANAEE
chr1	350966814	-1		chr1_350966814_-1	CYP721B10_1D_Triticum_aestivum(wheat)	100	59	QVNMVLKETLRLYPPALFVNRTVARDVKLGKLDIPAGTQVNLPIVDIHHDVGIWGVNAEE
chr1	357965358	-1	CYP51	chr1_357965358_-1	CYP51H45_1D_Triticum_aestivum(wheat)	100	60	MMNSITLLGQLPKLLMRGIQATIHDLYTSFGSVFTVNLFGHKITFLIGPEVSAHFFQALESEISQGNFYEFTVPMFGQEVGFGVDSAT*SEQSRFSVDALRPSKLRNHVDPMLQEVEGYFAKWGQEGIIDLKHELSQVLLLISGRCLIGKEIREKMLDEFYALFHDVENGLNLINLAFPYIPTTINRRRDRARSKLVEMLSEIVRSRMSHDQTEEDALQNLIHSKYKDGHSMTESEVTGLMVALVFVGKHTSSQSCAWTGAYLLNDIKCLVAVIEEQKQIIKKHGDQIDYGVLLEMDTLHGCIKEALRLHPTTPMLIRKAHKHFTVWTKEGNEYNIPAGHTLVSPKIFNNNIPSIYKDPRVYDPERFGSQRKEDKVGGKFSYTSFSGGRHACPGEAYAY…
chr1	366163037	-1		chr1_366163037_-1	CYP71AD7_1D_Triticum_aestivum(wheat)	75	60	PYLKAVVKETLRLHPPVPLLLPRECMQDATVLGYHVAEGTRVFVNAWAINRDPGSWHAPD
chr1	378954573	1		chr1_378954573_1	CYP94C106_1D_Triticum_aestivum(wheat)	100	60	EVSRVTAGGRDADDHPAIATSEKLKDMHYVHAALYECMRLFPPVQFDSKFAAGEDTLPDG
chr1	395735626	1		chr1_395735626_1	CYP89B31_1D_Triticum_aestivum(wheat)	98.33	60	TVNFMVAEMGRDESTWDKAMEFAPERFLEAGEKLAAVDLYGSKGIKMMPFGVGRRICAGL
chr1	407124075	-1		chr1_407124075_-1	CYP714D8_1D_Triticum_aestivum(wheat)	100	60	FVPVSTMHHDAVSWGPTVHQFDPDRFKNGVAAACKNPQAAFMPFGLGARTCLGQNLAIVE
chr1	407193133	1		chr1_407193133_1	CYP714D7_1D_Triticum_aestivum(wheat)	100	60	STMHHDAASWGPTVHRFDPDRFKNGVAAACKNPQAAFMPFGLGARTCLGQNLAIVEVKTL
chr1	412678356	1		chr1_412678356_1	CYP98A10	100	59	PLEFRPERFLEESIDIKGSDFRVLPFGAGRRVCPGAQLGINLVASMIGHMLHHFEWSLP
chr1	433660500	1		chr1_433660500_1	CYP71R13_1A_Triticum_aestivum(wheat)	100	52	ETLRLHPPVPLLIPRESIQDAQLHGYDIPAKTRVMVNTWAIGRDDESWENAE
chr1	433710940	1		chr1_433710940_1	CYP71R13_1D_Triticum_aestivum(wheat)	93.33	60	PAVPLLIPRESIQDAQLHGYDIPAKTRVMVNTWAIGRDKESWENAEEFRPERFLGGTIDY
chr1	433719561	1		chr1_433719561_1	CYP71R13_1D_Triticum_aestivum(wheat)	98.33	60	KMNLLQAAMKETLRLHPAVPLLLPRESIQDAQLHGYAIPAKTNVMVNTWAIGRDNESWEN
chr1	433743577	1		chr1_433743577_1	CYP71R13_1D_Triticum_aestivum(wheat)	84.21	57	YDTLAKTRVMVTTWAIGKDNESWENGEEFRPERFLDGTIDYNGKDPRFLPFGVGRRG
chr1	433776784	1		chr1_433776784_1	CYP71R11_1A_Triticum_aestivum(wheat)	100	60	MSLLKAAMKEALRLHATVPLLVPHESIKDTWLHGYYIPAKTRVIVNAWAIGRDGKTWEHA
chr1	443503148	-1		chr1_443503148_-1	CYP72A6v2	100	60	TMILYEVLRLYPPATVFTRKTYKKIEIGGITYPAGVMFEMPVLYIHHDTDIWGEDVHQFK
chr1	449185037	1		chr1_449185037_1	CYP94B77_1D_Triticum_aestivum(wheat)	100	46	DGTRVASGDRVTYFQYGMGRMEAIWGSDAGEFSLERWLALPADGNA
chr1	449467965	1		chr1_449467965_1	CYP89B37_1D_Triticum_aestivum(wheat)	98.33	60	PERFVAGGDREGVDVTGNREIRMMPFGAGRRICAGLGVAMLHLEYFVANMVREFEWKEVA
chr1	453233280	-1		chr1_453233280_-1	CYP84A100_1D_Triticum_aestivum(wheat)	100	60	GGYFVPKGSRVLVNAWAINRDPGAWKDGDTFRPSRFMPGEREAAGLDLKGGCYEFLPFGS
chr1	456695631	-1		chr1_456695631_-1	CYP93G2_Hordeum_vulgare_v1.0	94.83	58	vGEPDVAQMPYLQAVLKETLRLRPPAVFAQREAMQPIHVRGYTIPVKTSVFFNIFTIG
chr1	474556216	-1		chr1_474556216_-1	CYP89B33_1D_Triticum_aestivum(wheat)	100	60	DVEVGGYLVPKGATVNFMVAEMGRDEREWEKPMEFIPERFSGGRGVDVTGGSTGIRMMPF
chr1	474798683	1		chr1_474798683_1	CYP71Y17_1B_Triticum_aestivum(wheat)	95	60	MDMLATRTTWLAIGILFIIVVSTKILRWKSSVHPLSTRPPPPIVNVLGLLPSLFIKGFGVTINDLYTKFGSVFTVSLLGPKITLLVGPEVSTHFFQGLESDIGVRKFMEVTIPIFGQEVFYGVDTATCSEQLNFIVDALKPSRLRSLVDPMSQEVEAYFAKWGQDGIVDLKHELEQVLMFISSRCLLGYEVRDMMLEEVYSLFHDHANGLNFLSFLFPYTPTPRNRRRDKAHIRLKEIFTATIRSRRSSGRVEEDALQRLMNSKYKDGRFTTEAEISGMIMGLVVAGHISSTSTSTWTGACMLSNTKFLIAAMEEQKHIISKYKNQIGYEALSEMDTLHRCIKEAIRMHTSAPVLVRKAHTKFRVHTKEGEEYDIPGGHNILVPTALNNKLAHIYSDPH…
chr1	474806433	-1		chr1_474806433_-1	CYP71Y16_1D_Triticum_aestivum(wheat)	98.33	60	GQAASDFGGGDFAFLPFGAGRRMCPGMAFGLANVELALASLLFHFDWEWAGPGSELDMTE
chr1	488665544	1		chr1_488665544_1	CYP71AM7_1D_Triticum_aestivum(wheat)	100	60	KETLRLHPPGPLVPRMCLQDCKIQGHVVPQGAIVVTNVWAISRDPKYWYEPEKFMPERFK
chr1	498750308	-1		chr1_498750308_-1	CYP75B121_1A_Triticum_aestivum(wheat)	100	60	TFRLHPSTPLSLPRVAAEDCEVDGYRIPKDTTLLVNVWAIARDPASWGDDVLEFRPTRFL
chr2	717804	-1		chr2_717804_-1	CYP96B1	80.77	52	AFDVSELSSLVYLHAALCECLRLYPPLAFQHKAAIAGDVLPRGHEWKTGDKIL
chr2	779337	-1		chr2_779337_-1	CYP96B1	75	60	ELSSLVYLHAARCKWLRLYPSVPF*HKAAIAGDTLPRGHELKAGDKILLYCYSMGRMEGV
chr2	816278	-1		chr2_816278_-1	CYP96B19	89.66	58	YSMGRMEGVWGKDCMEFRPERWVTDDGKLRYEPSYKFIAFNAGPRTCLGKEVAFTQMKA
chr2	818509	1		chr2_818509_1	CYP96B30	70.91	55	KMVAGNDIMPSGHEVHTGDTIFISLYSMGRMEGVWGNDCLDYNPDRWIVNDGNNL
chr2	835552	-1		chr2_835552_-1	CYP96B1	75	60	ELSSLVYLHAARCKWLRLYPSVPF*HKAAIAGDTLPRGHELKAGDKILLYCYSMGRMEGV
chr2	889387	-1		chr2_889387_-1	CYP96B1	85	60	AIAGDVLPSGHELKAGDKILVYSYSMGRMEGVWGKDCMEFRPERWVTNDGKLRREPSYKF
chr2	909652	1		chr2_909652_1	CYP96B5	76.67	60	SELSNLVYLHAALCECMRLYPPMPFQHKVAIASDVLPSGHKMMAGDKILVYSYSMGRI*G
chr2	949526	1		chr2_949526_1	CYP96B30	63.83	47	LPSGHKVHAGDTILISILSTRRMKSVWGNDCLDYNPSRWLTEDGNNI
chr2	1170286	1		chr2_1170286_1	CYP96B30	76.27	59	NEIKSLVYLRAVLYETLRLYPPTPFERKTVSADDIMPSGHEVHTSDTILISLYSLGRMEG
chr2	1389945	1		chr2_1389945_1	CYP96B89_Alopecurus_aequalis	84.75	59	DETKSLVYLRAVLYETLRLYPPAPLERKMVAANDIMPSGHEVHAGDTILISLHSMGRME
chr2	1650554	-1		chr2_1650554_-1	CYP96B-fragment5_Beckmannia_syzigachne	81.13	53	KSLVYLRAVLYETLRLYPPAPLERKMVAASDIMPSGHEVHAGDTILISLHSMG
chr2	1750190	-1		chr2_1750190_-1	CYP96B86_Beckmannia_syzigachne	81.13	53	VIFEPEETKSLVYLRAVLYETLRLYPPGPIECKTVATDDIMPSGHKVRSGDTI
chr2	2046058	-1		chr2_2046058_-1	CYP71F29_2B_Triticum_aestivum(wheat)	88.33	60	LHPPVPLLPRSAIEDCKIMDCDMVKGTNVYINVYAVSRDPRYWKNPEEFKPERFEENNMD
chr2	2319705	-1		chr2_2319705_-1	CYP96B86_Beckmannia_syzigachne	83.02	53	VIFEPEETKSLVYLRAVLYETLRLYPPGPIECKTVAADDIMPSGHKVRSGDTI
chr2	2414979	1		chr2_2414979_1	CYP71F35_2D_Triticum_aestivum(wheat)	91.38	58	SQIMGYNMSKGTNIFVNVFAISRDPKYWDNPEEFKPERFENSSVEYYGTHFEFTPFGAG
chr2	2439735	1		chr2_2439735_1	CYP76AS6_6D_Triticum_aestivum(wheat)	93.33	60	HAVVKETLRLHPAVPLIPREVATNGVSLGGFPIPIGMGVVVNLWAIGRDPMVWPQPNKFV
chr2	2445561	1		chr2_2445561_1	CYP71W28_2D_Triticum_aestivum(wheat)	90	60	LVMRETLRLHAPLPFLLPRQCREPCEVMGYHIPEGTKVLVNAWALGRDGAYWEDAEAFKP
chr2	2537849	-1		chr2_2537849_-1	CYP71F24_2D_Triticum_aestivum(wheat)	100	58	RPERFENNNTNYNGTYFEFTPFGAGRRQCPAIQFSSSVLEMTLTNILYHFNWKLPGGA
chr2	2653266	-1		chr2_2653266_-1	CYP71F1	88.33	60	LRLHPPGPLVPRMAREECTVMGYDIPKGTSVYINVFAISRDPRYWNNPEEFRPERFENNH
chr2	2681435	-1		chr2_2681435_-1	CYP71F19_1B_Triticum_aestivum(wheat)	84.75	59	PACWDNPGEFKPDRFENNVNYNGTYFEFIPFGAGRRQCPGIQFSSSLMEMALTNFLYH
chr2	3087395	-1		chr2_3087395_-1	CYP71F26_2D_Triticum_aestivum(wheat)	95	60	LRLHLPAPLIPRMARMDCKIMRYELLKGTTILINVFAVSRDPKYWKHPEAFLPERFENNN
chr2	3094178	1		chr2_3094178_1	CYP71F25_2A_Triticum_aestivum(wheat)	100	60	MRMIIKEVLRLHPPGPLIPRRAREDRKVMGFDMLEGTNVYINAFAVSRDPNCWESPEEFK
chr2	3145335	-1		chr2_3145335_-1	CYP94D95_2D_Triticum_aestivum(wheat)	96.67	60	ERWLDGEGVFRPASPFKYPVFHAGPRMCLGKEMAYIQMKYIVACVLERFSLRYVAGKGHP
chr2	3151238	-1	CYP709C53_2D	chr2_3151238_-1	CYP709C53_2D_Triticum_aestivum(wheat)	100	172	EEIIEECKTFYLAGHETTAQLLTWTMFLLSTHSEWQEKLREEVVRECGKDIPTDDKLNNMKLVNMFILETLRLYGPVTNIQRKTGSNLELGGIKVPEGTILSTPIKTIHRDKELWGKDAEEFKPQRFENGVGRAAKHPYAFLPFSIGPRACIGQNFTMIEAKVVFAMILQRF
chr2	3362325	1		chr2_3362325_1	CYP96B30	78.85	52	TLYETLRLYPPAPVLLKKVAVDDIMPSGHEVHAGDTIFVSVHSMGRMEGVWGK
chr2	3366183	1		chr2_3366183_1	CYP71F39_2D_Triticum_aestivum(wheat)	98.31	59	YMRMVIKEVLRLHPPAPLLPRRAREDCEIMGYKIPEGTNVQVNIFVICQDCRYWDAPEA
chr2	3366207	1		chr2_3366207_1	CYP71F39_2D_Triticum_aestivum(wheat)	98.33	60	VLRLHPPAPLLPRRAREDCEIMGYKIPEGTNVQVNIFVICQDCRYWDAPEAFKPERFKES
chr2	4025021	1		chr2_4025021_1	CYP71F31_2D_Triticum_aestivum(wheat)	100	59	CKIMGYDIPKGTTIYVNAFAISRDPKYWDSPEEFNPERFENNNMDYYGTHFEFTPFGAG
chr2	4031104	-1		chr2_4031104_-1	CYP71F30_2D_Triticum_aestivum(wheat)	100	59	KNPEEFKPERFENNSIDYNGTYFEYTPFGSGRRLCPGMLFSTSTLDIVLANLLYHFNWI
chr2	4350457	1		chr2_4350457_1	CYP76M27_2A_Triticum_aestivum(wheat)	94.55	55	MEIELWLLWPTLAVVSLLYCMAITARTRRAGTGRMPPGPTPLPLVGNMLSLGGNLHHTLAHLARAYGPVMTLKLGLTTAVIVSSRDAAWEAFTKHDRRLAAHAIPDAARALGHSDRSMIWLPSSDPLWKSLRGIVAANVFSPRGLAAARAARERKVRDMVSYFRDRADTEVDVGQALYGGVLNVLSNALCSVDVVDMGAAESAQRVRELVEDLIAVIAKPNISDLVPCLRRLDLQGWRRWTAIRIDKIFRLLDDIIDGRMAAAANTSTEEKHGDFLELFCTGKIARDTLTAILFDVFTAGSDTMSLTVEWAMAELLKNPAIMAKVRAEIDDALGGKETIGENDAAGLPYLQAVVKEAMRLHPVVPILLPRRAVEDGVEIGGYAVPKGSTVIFNAWAMMR…
chr2	4356241	-1		chr2_4356241_-1	CYP76M27_2A_Triticum_aestivum(wheat)	98.33	60	HPVVPILLPRRAVEDGVEIGGYAVPKGSTVIFNAWAMMRDPAAWERPDEFVPERFLGKAD
chr2	4362446	1	CYP51	chr2_4362446_1	CYP51G3_2B_Triticum_aestivum(wheat)	93.33	60	MEFPGVLWLAFVPISVAVVSIMMARRRATSFLTTKRSPPPPPTAAGAPFLGILPALVAKGPLRVLRDAHAEMGSVFTVRLLHRKVTFLVGPDVSSHFYQGLESEISQDEVSQFTTPTFGPGVAFDVDFVTRREQFRFFGDAMKPAKLRTYARLMVREVEYYFARWGQSGTVDLKQELEHLVTLVASRCLFGEEVRAKMLVEVATHLRELNDGMRLVTILFPHLPIPAHHRRDKARARLGEIFSDIVSSRKASCPDGSRNVVDDMLQCLIDSRYKDGRATTETEVVGMLVSALFAGQHTSSSTGTWTGARLLARANAKHLRAAVQEQERIMARHGDRVDYEVLQEMDTLHRCVKEVLRLHPPAMMLLRHARRSFTVRTSEGVEYEVPEGRTVASPLVIHN…
chr2	6071833	1	CYP85	chr2_6071833_1	CYP85A1_D_Gossypium_hirsutum	81.58	38	LPGYVIPKGWRIYVYTREINYDPFMYPDPMTFNPWRWL
chr2	6135385	1	CYP85	chr2_6135385_1	CYP85A1_D_Gossypium_hirsutum	81.58	38	LPGYVIPKGWRIYVYTREINYDPFMYPDPMTFNPWRWL
chr2	6142333	-1	CYP85	chr2_6142333_-1	CYP85A54_2D_Triticum_aestivum(wheat)	100	36	GHVIPKGWRIYVHTREINYDPFMYPDPTTFNPWRWL
chr2	6155456	-1	CYP85	chr2_6155456_-1	CYP85A57_2D_Triticum_aestivum(wheat)	94.44	36	GYVIPKGWRIYVYTREINYDSFMYPDPMSFNPWRWL
chr2	6159684	-1	CYP85	chr2_6159684_-1	CYP85A53_2A_Triticum_aestivum(wheat)	100	36	GYVIPKGWRIYVYTREINYDPFMYPDPMTFNPWRWL
chr2	6262624	1		chr2_6262624_1	CYP71K42_2B_Triticum_aestivum(wheat)	83.93	56	GFDVPVGATMLVSAWAIGRDPMHWDKAEEFMPERFDLNTIDFKRADFEYIPFGAGRT
chr2	6264199	-1		chr2_6264199_-1	CYP71C152_2B_Triticum_aestivum(wheat)	91.67	60	LRLYPVAPFLPLHLAMGDCNIAGYMVPAGTHILVNVWAIGRNSNSWEDAEEYIPERFIDE
chr2	6750863	1		chr2_6750863_1	CYP84A106_2B_Triticum_aestivum(wheat)	88.33	60	RFMPNGEAIGLDPQGGSDEFLSFGFGRRSCPGQGLSQHTVEFAVAQLVHGFNWKPPDGMK
chr2	8660572	-1		chr2_8660572_-1	CYP79A143_2A_Triticum_aestivum(wheat)	100	60	YLKSCIREAFRIHPYHAFNPPHVAMVDTTIAGYTIPKDSHVILSRMGLGRNPKIWNEPLD
chr2	8697374	1		chr2_8697374_1	CYP71E29_2A_Triticum_aestivum(wheat)	96.67	60	YLRMVVKETLRLRIPAALLVPRETLWKIQIAGYEIPAKTRVIVNAWAIARDPNVWKDPEE
chr2	8833634	-1		chr2_8833634_-1	CYP71U8_2D_Triticum_aestivum(wheat)	100	60	FRPERFEEMSVEYFKQGPQMEFIPFGAGRRQCPGALFASTTMELVLANLLYYFDWAIPGG
chr2	8852469	1	CYP51	chr2_8852469_1	CYP51H47_2D_Triticum_aestivum(wheat)	100	60	MHMGMDGITIHTAACFTIAFLFLTTIISEIIARIRTIHLTRKGKRSSITLRPPQVVSGAPLMAALFTLVTPKKGLHAAIHELHMKMGSVFTVNLFGLKKVTFLVGPEVTPHFFKGSPSEIDFGDTAKIIVPVLGQGVLFGVDMATRNEQIRFCTKAIQPARLRRDVQSMVCVVEDYFAKWGQSGTVDLKHELGHLIVLIANRCLLGNEIKGNNMEEVSRLLHELFENSFHMINLFFPHLPIPPHRRRDEARARLGEILHEIVRSRRRISPARVMDSNDDDEGDVLQSFIDSKYSDGRSMTESEIVGLLIAILFAGQHTSSSTSTWTGACLLSNQKYMTAAMKEQKKIIEQNGEPIDYTILSKMDALRCCIKEALRLYSPTPLLLRHAHKSFTVQTRDGM…
chr2	9366486	-1		chr2_9366486_-1	CYP79A142_2A_Triticum_aestivum(wheat)	100	60	YLKSCIREAFRIHPYHALNVPHVAMADTTVAGYTIPKDSHILLSRLGLGRNPKIWTEPLE
chr2	9557100	-1		chr2_9557100_-1	CYP79A142_2A_Triticum_aestivum(wheat)	100	60	YLKSCIREAFRIHPYHALNVPHVAMADTTVAGYTIPKDSHILLSRLGLGRNPKIWTEPLE
chr2	9774367	1		chr2_9774367_1	CYP71C149_2D_Triticum_aestivum(wheat)	98.33	60	IGRDSSSWGDAEEFIPERFIYEDSDVDVNFKGNDFQFLPFGSGRRMCPGINFAIANFELM
chr2	9843047	-1		chr2_9843047_-1	CYP79A141_2A_Triticum_aestivum(wheat)	98.33	60	YLKSCIREAFRIHPYHALNLPHVAMVETTIAGYTIPKDSHILLSRLGLGRNPKIWSEPLE
chr2	9881523	-1		chr2_9881523_-1	CYP79A142_2A_Triticum_aestivum(wheat)	98.33	60	YLKSCIREAFRLHPYHALNVPHVAMADTTVAGYTIPKDSHILLSRLGLGRNPKIWTEPLE
chr2	9889234	1		chr2_9889234_1	CYP71C148_2A_Triticum_aestivum(wheat)	98.33	60	LRLHPVAPLLAPHLAMADCSIDGYMIPAGTHVFVNVWAIGRDSSSWEDSEEFIPERFIEE
chr2	10507848	-1		chr2_10507848_-1	CYP723A22_Beckmannia_syzigachne	69.23	52	AGDFYVNFSAGDIGRDSKIWKDPDEFLPERFLTGGDGEGIGPLPGPKQIRMMPF
chr2	11033061	-1		chr2_11033061_-1	CYP71F22_2D_Triticum_aestivum(wheat)	98.31	59	ENCNIMGYDVPKDTNVFINVFATHRDSQYWDNPEEFNPERFVNKNIDYNGTYFEFTPFG
chr2	11202666	-1		chr2_11202666_-1	CYP99A9_2D_Triticum_aestivum(wheat)	100	60	DVRTSQKGSQFDYLPFGSGRRTCPGDIFALAVLELMVARLLYYFDWSLPAGVKPSELDME
chr2	11626419	1		chr2_11626419_1	CYP99A8_2A_Triticum_aestivum(wheat)	100	60	YTKMVIKEAMRLYPVVPMLIPHVCRETCDLGGFEVTKGTRVMVNTWAFGRNPEYWHEPEE
chr2	11644820	-1		chr2_11644820_-1	CYP99A10_U_Triticum_aestivum(wheat)	100	59	EDGTATYKGSRFEYLPFGSGRRNCPGDTFGLAVLELMVARLLYYFDWSLPAGVKPGELD
chr2	11677162	-1		chr2_11677162_-1	CYP99A7_2A_Triticum_aestivum(wheat)	100	53	IKESMRLNPVLPLLVPRICRETCHVGGFEIVEGSRLMVNSWAIGRSPESWDDP
chr2	13167745	-1	CYP51	chr2_13167745_-1	CYP51H31_2B_Triticum_aestivum(wheat)	98.33	60	EIMRKYKDKIDYNVLSKMETLHSSIKEAGRMHPATLGLIRQTQKNITVRTKEGTEYGILK
chr2	13174607	-1	CYP51	chr2_13174607_-1	CYP51H45_1D_Triticum_aestivum(wheat)	100	60	EIMRTYGDKIDYNVLLEMETLHSCIREAGRMNPISFGLVGQAQKNIIVRTKEGVEYDIPK
chr2	13246854	-1	CYP51	chr2_13246854_-1	CYP51H33_2D_Triticum_aestivum(wheat)	100	60	MDLTIGTMLLVLAIILITAIVIKIANARVTFDPVCTRPPPPVVNSIALLKLLPTLCTKGPEVTMTYLYNKFGSVFTVSILWKRISFLVGPEVSGPFFQGSESEVSQGNFNEFTVPMFGQENGFAVDCSTRMDEIRFYIDALKPSQLRSHVDPMLREVEDYFGKWGDVGVVDLKYEFNHILMLIASRCLLGKEVREKIFGEFYTLFTEIEEGVNLVSFMLPYIPIPVNRRRDRARIKLTEIVTEILRSRKICNRIEEDVLQKLMDSRYKDGRCTTEAAVAGMIIALIFAGKHTSAVVSTWTGACLLTHEKFLDAAFNEQKEIMRTYGDKIDYNVLLEMETLHSCIKEAGRMNPISFGLVRQAQKNIIVRTKEGVEYDIPKGDTLVNLVMLTHKLPHIYKD…
chr2	13306195	1	CYP51	chr2_13306195_1	CYP51H31_2A_Triticum_aestivum(wheat)	91.67	60	MDLTIGTMLLVLAIILITAIVIKIANARVTFDPVCTRPPPPVVNSIALLKLLPTLCTKGPEVTMTYLYNKFGSVFTVSILWKRISFLVGPEVSGPFFQGSESEVSQGNFNEFTVPMFGQENGFAVDCSTRMDEIRFYIDALKPSQLRSHVDPMLREVEDYFAKWGEEGVVDLKDELNHILMLIASRCLLGNEFRESLHGNEVREKPFGEIYTLFSGIEEGVNLVSFMLPYFPVPANHRRDKARIRLTEIVYDIMRSRKTCGRVEEDVLQKLMDSRYKDGRRTTEAAVAGMIIGLIFAGKHTSSNVSTWTGACLLTHTKFLDAVVEEQREIIRKYKDKIDYNVLSKMETLHSCIKEAGRMHPVTLGLIRQTEKNINVRTKEGTEYGIPKGDTLVNLVMLT…
chr2	13316220	1	CYP51	chr2_13316220_1	CYP51H33_2D_Triticum_aestivum(wheat)	45	60	KNVVVRTKEGVEYVIPKGVTCKSCNDNQ*IATHLQGSRSI*P*SVSFW*RDEDKVGGKCS
chr2	15627770	-1		chr2_15627770_-1	CYP93G18_2D_Triticum_aestivum(wheat)	100	60	ETLRLRPAAPIAHRQSTEEMVVTAAGGVGGFTVPAGTAVFMNLWSIARDPANWDAPLEFR
chr2	16108716	1		chr2_16108716_1	CYP71C11_U_Triticum_aestivum(wheat)	100	60	LRLHMPAPLLVPHLSMADCKINGYTIPSGTRAIVNSWALARDPSSWESAEEFMPERFMEG
chr2	16252174	1		chr2_16252174_1	CYP71C154_2B_Triticum_aestivum(wheat)	96.67	60	YLKAVIKETLRLHMPGPLLVPHLSMADCNIKGYMIPSGIRVIVNSWALARDPSSWEHADE
chr2	16376450	1		chr2_16376450_1	CYP71C143_2A_Triticum_aestivum(wheat)	100	59	ETLRLHMPGPLLIPHLSMADCNIKGYTIPSGIRVIINSWALARDPSSWEHADEFMPERF
chr2	20303995	1		chr2_20303995_1	CYP71U10_2A_Triticum_aestivum(wheat)	74.47	94	SKEDCRVMGYDIPKGMSVIINAFAVGTKPRHWGQDAAEFRLERFXXXXXXXXXGPQMEFVPFGAGPMQCPGALFATTTMELVLGNLLYHFDWSIPG
chr2	23021653	-1		chr2_23021653_-1	CYP71F38_2D_Triticum_aestivum(wheat)	100	58	VMGYDIPKDTSVYINVFAISQDPRYWDKPEEFRPERFENNDVNYNGTYFEFLPFGTGR
chr2	24466684	-1		chr2_24466684_-1	CYP81M9_2D_Triticum_aestivum(wheat)	100	60	RLHPIAPLLAPHESSAACSVAGYDIPAGTMLLVNVHTMHRDALVWEEPTRFSPERFEGAR
chr2	24579869	1		chr2_24579869_1	CYP71AB18_2B_Triticum_aestivum(wheat)	95	60	LQCVIKETLRLHTPGPFGLPRESQEACRVMGYDVPKGTMVLVNAWAISRDPEYWDEPEMF
chr2	27544849	-1		chr2_27544849_-1	CYP729A8	98.04	51	APMVHRVANKDVEYGGYMIPAGWSVLVWVRSLHTDPSFYHDPLTFNPDRWDV
chr2	28470416	-1		chr2_28470416_-1	CYP71F1	81.67	60	KETLRLHPPGPLVPRATREDCTILGYDIPKGTNVYINVFAISRDPRYWNNPEDFKPERFQ
chr2	31462207	-1		chr2_31462207_-1	CYP51G3_2B_Triticum_aestivum(wheat)	90	60	MESTRVLWLAFVPIFAAIIVSITMARRRMAFSPTTKRPPPPPPMAAGAPLLGILPALLAKGPLQVIHDAHAELGSAFTMGLLHRKVTFLVGPDVSSHFYQGLDSEISQDEVSRFTIPTFGPGVGFDVDLATRREQFRFFGDAMKPAKLRTYAGLMVREVEEYFARWGQSGAVDLKKDLEHLVTLMASRCLFGEEVRTKMLAEVATHLCELNDGMRLVTILFPHLPIPAHRRRDRTRARLGEIFSGIISSRRASYLDGGARNVKDDMLQCLVGSRYKDGRATTETEVVGVLVSALFAGQHTSSSTGTWTGARLLERANAEHLRAAVREQERIVARHGDRVDYEVLQEMDILHRSVKEALRLHPPAMLLLHHARRSFTVRTREGDEYEVPEGRTVASPLVL…
chr2	33686934	1		chr2_33686934_1	CYP71X32_2A_Triticum_aestivum(wheat)	100	59	EVDFKGTNFEYTPFGAGRRICPGMLFAQSSMELALAALLYHFDWELPAGGELDMEEEMG
chr2	33690888	1		chr2_33690888_1	CYP71X32_2A_Triticum_aestivum(wheat)	100	60	KETLRLHPSVPLLLPREPTEACKVLGYDVPTGTTVFVNTWAICRDPKHWDAPEEFRPERF
chr2	38973473	-1	85% to CYP74A99_5A	chr2_38973473_-1	CYP74A99_5D_Triticum_aestivum(wheat)	79.63	108	NYGRLADFFRDAGKAVIDEGERLGIAREEAVHNILFAMCFNSFGGXXXXXXXXXXXXXXAGPRAPGRLAMEVRATVRANGGEVTIQALAEMPLVKSAVYKALRIEPPV
chr2	57041720	1		chr2_57041720_1	CYP714B8	72.73	55	ALRELTLGGVRVPKGVNIYVPVSTVHLDAELWGSHAREFDPERFAARPQLHSYL
chr2	57039468	1	100% to CYP714B1_2D	chr2_57039468_1	CYP714B1_Oryza_sativa	72.45	519	MGVAPAVGVVASLCCVGACALALYLYRILWLAPETVRRALRRQGVRGPPPSFPYGNLADMRQAAAAAKRTRGAGDVVHDYRSAVFPFYEKWRNEYGPVFTYSVGNMVFLHASDPAVVRDVCLSVSPDELGKSSYMKVTHHPLFGDGILKSNGDAWARQRKLIAPEFFPDKVKGMVDLMVDSARALVCSWEARVARTDGGAMELTVDDDFRTYSGDVISRTCFGSSYVKGKRIFAMIRELQKTVSRPNLLAEMTGLRFLPTRSNREAWRLNRRVRRLILDVVRESGEADGGNNLLNAMLRSGQAEAGVGVAAAEDFVVDNCKNIYFAGYETTAVTAAWCMMLLALHPEWQRRVRDEAREALAGGGALDLSSLQRMKQLTMVIQETLRLYPAGSVVSRQAL…
chr2	70246030	1		chr2_70246030_1	CYP89E21_2B_Triticum_aestivum(wheat)	93.33	60	PYLNAVVLEALRLHPPVHFLIPHGVQSDGAEIGGYRVPRGAEVNILIAEVGRDETVWTAA
chr2	75191007	1		chr2_75191007_1	CYP709E17_2D_Triticum_aestivum(wheat)	93.33	60	QMTMVLHEALRLYGPALFMQRKTITDMVVGAITIPKDHAVVIGAPFMHRDKKVWGEDADQ
chr2	85459624	-1		chr2_85459624_-1	CYP734A5	90	60	IVNETLRLYPPAVAMIRTANRDVELGGCVVPAGTELLIPILAVHHDEEHWGADAAEFNPA
chr2	89954627	-1	CYP727	chr2_89954627_-1	CYP727A2	87.94	141	DLTLKSSITMPAGAILVVPLHLVQRDASVWGNDACQFNPSRFLQKGIDLGGILAAHKGSNGIKLFTERDKSDSFLPFGSGNRACVGQKFAILGISMLVASLLHNYEVQPQPALTKEMDLAVDTNNFRHLPNPKIVLTKRKI*
chr2	91475871	-1		chr2_91475871_-1	CYP71C147_2D_Triticum_aestivum(wheat)	100	60	ETLRLHPPLPLLIPHLSMVASEVDVAGYTVPSGAWVTVNSWAINRDPEWWEKPEEFLPER
chr2	102135173	1	CYP709C3_2D	chr2_102135173_1	CYP709C3v2	99.17	242	ELIRYLPTEKNLKIWKLDKEVRTMLMNIIKGRLATKDIMGYGNDLLGLMLEACAPEDRQNPLLSMDEIIDECKTFFFAGHDTSSHLLTWTMFLLSTHPKWQEKLREEVLRECGNGVPTGDMLNKLQLVNMFLLETLRLYAPVSAIQRKAGSDLEVGGIKVPEGTVLTIPIATIHRDKEVWGEDANEFKPMRFENGVTRAGKHPNALLSFSSGPRSCIGQNFAMIEAKAVIAVILQRFSFSLSPK
chr2	102146795	1		chr2_102146795_1	CYP709C51_2A_Triticum_aestivum(wheat)	100	58	SRLRLVNLFLLETLRLYSPVPLIRRRTRSEVELGGVTVPRDALLTIPIATMHRDREVW
chr2	102169732	1		chr2_102169732_1	CYP709C51_2A_Triticum_aestivum(wheat)	100	60	RLRLVNLFLLETLRLYSPVPLIRRRTRSEVELGGVTVPRDALLTIPIATMHRDREVWGED
chr2	102520035	-1		chr2_102520035_-1	CYP709C3_2A_Triticum_aestivum(wheat)	93.22	59	PEGTVLTIPIATIHHDKEIWGEDANEFKPTRFENGVTRSGKHPNALLSFSSGPRSCIGQ
chr2	102688526	-1		chr2_102688526_-1	CYP709C50_2D_Triticum_aestivum(wheat)	100	59	EGTVLTIPIAMIHHDKEVWGEDANEFKPIRFENGVMRAGKHPNALLSFSNGPRSCIGQN
chr2	103112791	-1		chr2_103112791_-1	CYP709C3_2A_Triticum_aestivum(wheat)	100	59	EGTVLTIPIATVHRDKEVWGEDANEFKPTRFENGVTRAGKHPNALLSFSSGPRSCIGQN
chr2	103127319	-1		chr2_103127319_-1	CYP709C2_2B_Triticum_aestivum(wheat)	100	59	VWGEDANEFKPMRFENGVTRAGKHPNALLSFSSGPRSCIGQNFAMIEAKAVIAMILQRF
chr2	108112228	1		chr2_108112228_1	CYP73A203_2D_Triticum_aestivum(wheat)	100	60	VVVNAWWLANNPELWEKPEEFRPERFLDEESNVDATVGGKVDFRFLPFGVGRRSCPGIIL
chr2	128248293	-1		chr2_128248293_-1	CYP78A262_2D_Triticum_aestivum(wheat)	100	60	IVKETLRMHPPGPLLSWARLAVHDAHVGAHLVPAGTTAMVNMWAIAHDAAVWPEPEQFRP
chr2	165852386	1	CYP51	chr2_165852386_1	CYP51G3_2B_Triticum_aestivum(wheat)	98.33	60	MELAIVLWVACFPIFLAILSTMMARRRPTVSQTTKRSPSPPPMAPGAPLVGILPALLAKGPLQVIRNAHTEMGSVFTVRLLHRKVTFLVGPDVSSHFYQGLDMEISQDEVSRFTIPTFGPGVAFDVDFATRREQFRFFGDAMKPAKLRTYAGLMVREVEEYFARWGQSGTVDLKQELEHLVTLVASRCLFGEEVRAKMFGEVATHLRELNDGMRLVTIMFPHLPIPAHRRRDRARARLGEIFSDIVSSRKASYPDGGPDDMLQCLIDSRYKDGRATTETEVVGMLVSALFAGQHTSSSTSTWTGARLLVRANSEHLRAAVREQERIVARHGDRMDYEVLQEMDTLHRCVKEVLRLHPPAMMLLRHARRSFTVRTREGDEYEIPEGRTVASPLVLHNCLP…
chr2	165986450	-1		chr2_165986450_-1	CYP72A577_2D_Triticum_aestivum(wheat)	98.33	60	TYKEMKIGGITYPAGVLIELPLLLMNHDPDIWGRDVHEFKPERFTNGISQASKNPGAFLP
chr2	197266785	-1		chr2_197266785_-1	CYP728B3	90.24	41	MKFTWRVAQETLRIVPPVFGNFRRALEDVEFDGYSIPKGWQ
chr2	248149981	1		chr2_248149981_1	CYP76M31_6B_Triticum_aestivum(wheat)	83.05	59	STVIFNMWAIMRDPKAWERAVEFVPERFLDKAAAVEFWGKDYEFIPFGSGRRLCPGPSM
chr2	248227962	-1		chr2_248227962_-1	CYP76M28_2D_Triticum_aestivum(wheat)	100	60	KEVMRLHPVVPIMLPHQVAEDGMEIGGFAVPKGSMVIFNVWAIMRDPAAWERPDEFVPER
chr2	316339260	1		chr2_316339260_1	CYP81A48_2D_Triticum_aestivum(wheat)	100	53	EAAADCQLHGYDVAAGTIVLVNAYAIHRDPAEWGPAPEEFRPERFEHGGAEGK
chr2	323228306	-1		chr2_323228306_-1	CYP728A5	76.67	60	MKYTWSAAMETLRLVPPVFSMLKRAVEDVEFDGHLIPKGWQVLGAMNLTQQDPAIFPEPS
chr2	369239446	-1		chr2_369239446_-1	CYP71V28_2D_Triticum_aestivum(wheat)	100	59	CEVDGYTITAKSRVLVNVWAISQDPKYWDAPEEFKPERFEKGDIDFMGSHYEFTPFGAG
chr2	371164579	1		chr2_371164579_1	CYP77A50_2A_Triticum_aestivum(wheat)	100	60	IESMPYLQAFVKELLRKHPPTYFSLTHAAVKPGSKLAGYDVPTDANLDIFLPTISEDPKL
chr2	380613162	1		chr2_380613162_1	CYP73A204_2D_Triticum_aestivum(wheat)	100	60	MAIPLLVPHMNLRAAELGGHGVPAESKVLVNAWHLANDPGLWERPGEFRPERFLEEERHV
chr2	396638410	1		chr2_396638410_1	CYP723A9 Brachypodium distachyon	58	58	PYLHAVVLESLRMHPSVPFVPHRVRAEDATLLGETTVPAGDFNVRFVVGDIGRDSKAW
chr2	430079524	-1		chr2_430079524_-1	CYP71S9_2D_Triticum_aestivum(wheat)	100	60	IKESMRLHPPVPLLVPRETTEPCTVHGCEIPAGTRVLVNAKAIGAHAGAWGADAAQFVPE
chr2	433590843	-1		chr2_433590843_-1	CYP71F20_2D_Triticum_aestivum(wheat)	100	60	VLRLHPPAALLPRKTREDCKIMGYDILEDTNIYINVFAISRDPRYWSNPEEFNPERFEDN
chr2	489048753	-1		chr2_489048753_-1	CYP84A104_2D_Triticum_aestivum(wheat)	100	60	ETLRVHPPGPLLQHEAAEDCDVAGCRIPKNTRVLINVWAIGRDAEAWKDAGTFRPSRFDA
chr2	505123997	-1		chr2_505123997_-1	CYP704A159_4D_Triticum_aestivum(wheat)	100	59	AGPRICLGKEFAYRQMKIFAAVLLYLFRFEMWERDSTVGYRPMLTLKMDGPLHVRASPR
chr2	507879544	1		chr2_507879544_1	CYP87B36_2D_Triticum_aestivum(wheat)	100	35	GYTIPAGWLVMISPMAVHLNPELFKDPLTFNPWRW
chr2	516777873	1		chr2_516777873_1	CYP86A10	100	60	KHVVADDYLPDGTFVPAGSSVTYSIYSAGRMKTVWGEDCLEFRPERWLSADGTKFEPHDS
chr2	530753017	1		chr2_530753017_1	CYP89J13_2D_Triticum_aestivum(wheat)	98.67	75	DIIHDGQRILTGTNVLFALKSLAQDKATWADPDEFKPERFLADKGGENVNLVAAAGSGGEIRMIPFGAGRRVCPG
chr2	533331518	-1		chr2_533331518_-1	CYP99A34_2A_Triticum_aestivum(wheat)	98.11	53	KEGLRLHPAAPLLLPRVCRETCNVSGFEIVEGSRVMVNAWGIARNPEYWHDAD
chr2	534260671	1		chr2_534260671_1	CYP99A33_2D_Triticum_aestivum(wheat)	100	60	YTRMVVKEGMRLHPVLPLLLPRVCRETCDVGGFEVTEGTRVMVNGWAIARSPEHWQDAEV
chr2	536370599	1		chr2_536370599_1	CYP92A151_2D_Triticum_aestivum(wheat)	100	59	PRLAREDASVGGYNIPVGTRVLINVWSIGRDPAVWDSPEEFIPERFVGSKIDIKGHDFE
chr2	539912003	-1		chr2_539912003_-1	CYP99A35_2D_Triticum_aestivum(wheat)	100	60	MVIKEGMRLHPVVPLLLPRVCQETCNIGGFEVSEGSRIMVNAWAIARSPENWNDAEEFRP
chr2	545814016	-1		chr2_545814016_-1	CYP728B3	90.24	41	MKFTWRVAQETLRVVPPIFGNFRRALEDTEFDGYLIPKGWQ
chr2	564729303	1		chr2_564729303_1	CYP71K39_2D_Triticum_aestivum(wheat)	100	53	EVLRLHPPAPLLLPRECMNDCRVLGFDVPKGTMVLVNAWAISRDPAHWDAAEE
chr2	564779432	1		chr2_564779432_1	CYP71K25	81.36	59	YMRLVIKEVLRLHPPAPPLLPRECMNDCRVLGFDVPKGTMVLVNAWASRDPAHWDAPE
chr2	564844381	1		chr2_564844381_1	CYP71K40_2D_Triticum_aestivum(wheat)	87.72	57	WDATEDFNLERFERGEIDFKGAYMEYTLFGAGRRMCPGMSFGLANVELALAGLLYHF
chr2	564866569	1		chr2_564866569_1	CYP71K39_2A_Triticum_aestivum(wheat)	94.64	56	TTVLVNAWAISRDPAHWDAAEEFIPERFEHGEIDFKGADMEYTPFGAGRRMCPGMSI
chr2	564885932	1		chr2_564885932_1	CYP71K39_2D_Triticum_aestivum(wheat)	98.11	53	VIKEVLRLHPPAPLLLPRECMNDCRVLGFDVPKGTMVLVNAWAVSRDPAHWDA
chr2	566221524	-1		chr2_566221524_1-	CYP71C142_2D_Triticum_aestivum(wheat)	100	53	ELGDMAYLRATVKETLRLHPPVPLLLPHLSIADCEVDGYAIPAGTRLMVNAWA
chr2	586343046	-1		chr2_586343046_-1	CYP84A103_2D_Triticum_aestivum(wheat)	98.33	60	ETLRLHPPIPILHHENAEDCVIGGYLVPQGSSVMINVFAIGRDAKVWKDADTFRPSRFMT
chr2	586616244	-1		chr2_586616244_-1	CYP76Q4_2D_Triticum_aestivum(wheat)	98.33	60	VPERFIGGETKNFQLGQDFDMIPFGLGRRICPGMPLAQKLIPLILGTLLHRFKWELPAEV
chr2	595732384	-1		chr2_595732384_-1	CYP75A79_2D_Triticum_aestivum(wheat)	98.08	52	IPHFSAEECEVDGYHIPRNTQLLVNIWAIGRDEGTWEDPLEFRPERFLSGPT
chr2	596905847	1		chr2_596905847_1	CYP72A583_2D_Triticum_aestivum(wheat)	100	59	QVMMVFNEVLRLYPPVMLINRRTYKKIELGGVTYPPNVMLALQLMFIHRDPAIWGDDAGE
chr2	607720900	-1		chr2_607720900_-1	CYP81N18_2D_Triticum_aestivum(wheat)	100	59	ETLRLCPVGPIIPAHEAMEDCTVGGFHVPRGTMILVNAWAIHRDANVWDAPEEFRPERF
chr2	607746930	-1		chr2_607746930_-1	CYP81N17_2D_Triticum_aestivum(wheat)	100	59	ETLRLFPVGPIIPAHEAMEDCTVGGFRVRRGTMILVNAWAIHRDASVWDAPDEFMPERF
chr2	616006191	-1		chr2_616006191_-1	CYP94C117_Alopecurus_aequalis	95.92	49	YVEGESRVMYHPYAMGRTPSIWGADYEAFRPDRWLTGPGGSFAPASLYK
chr2	616046479	1		chr2_616046479_1	CYP94C111_U_Triticum_aestivum(wheat)	100	60	YEHLMSLQYTHAVLFENMRLFPPVQFDSKFCAAADVLPDGTYVEAESRVMYHPYAMGRMP
chr2	616541342	1		chr2_616541342_1	CYP81A47_2D_Triticum_aestivum(wheat)	100	55	PHEAAADCQLHGYDVAAGTIVLVNAYAIHRDPAAWGPAPEEFRPERFEHGSAEGK
chr2	620586832	1		chr2_620586832_1	CYP71E33_3A_Triticum_aestivum(wheat)	98.33	60	TLRLHPPATMLLPREAMRDIQIGGYDVPAKTRIYVNAWAIGRDPTSWPDDPEEFKPERFE
chr2	621073071	1		chr2_621073071_1	CYP76H40_2D_Triticum_aestivum(wheat)	100	60	LHPPAPLLLPRQPETTVKIAGCTIPKGSRVFINVWAIGRDKDVWIEPEKFMPERFLGSTI
chr2	621090141	1		chr2_621090141_1	CYP76H47_7D_Triticum_aestivum(wheat)	100	58	EADIVRLPYLQAVIKETFRLHPPAPLLLPRQPEMTVKIAGYTIPKGSRVFINVWAIGR
chr2	621132375	-1		chr2_621132375_-1	CYP76H36_2D_Triticum_aestivum(wheat)	98.33	60	IFRLHPPAPLLLPRQPEATLKIAGYTIPKGSRIFINIWAIG*DKDVWDEPEKFMPERFLG
chr2	621185175	-1		chr2_621185175_-1	CYP76H35_2A_Triticum_aestivum(wheat)	92.98	57	EGYTIPMGSRLFINVWAIGRDKDVWTEPEKFMPERFLGPTIDFRGMDFELLPFGAGR
chr2	621514315	1		chr2_621514315_1	CYP89D1_2D_Triticum_aestivum(wheat)	100	60	ADVSLDEEVWGQPEEFRPERFLDGGEGAGVDLTGSREIRMMPFGAGRRICPGLGLAMLHL
chr2	632341341	-1		chr2_632341341_-1	CYP96B22	94.92	59	EETKSLVYMRAALHESLRLHPPVPIERKTAVANDVMPTGHVVHAGDTLLISLHSMGRMEG
chr2	637641672	1		chr2_637641672_1	CYP723A2_Oryza_sativa	78	50	GAAVVGATMVPNGDGLMVQFVLGDIGRDSKVWTDPDEFRPERFLAGGEAEGVGPLPGPK
chr2	639892654	-1		chr2_639892654_-1	CYP94D94_2D_Triticum_aestivum(wheat)	100	60	VHAAITESMRLYPPVPVNSVQARAADVLPDGTAVGAGWFVSYNAYAMGRMESVWGEDARA
chr2	642800422	-1		chr2_642800422_-1	CYP92A71	80	60	PYIEAIVKEAMRMHPVSPMLAPHLAREDASVNGHDIPAGTLVLVNVWAIGRDPTYWDAPE
chr3	2937420	1		chr3_2937420_1	CYP96B89_Alopecurus_aequalis	84.91	53	DETKSLVYLRAALYETLRLYPPAPIERKTVSGDDIMPSGHQVQAGDTIFISLH
chr3	7089687	1	CYP51	chr3_7089687_1	CYP51G3_2B_Triticum_aestivum(wheat)	98.33	60	VVGRYGDRVDYEVLQEMETLHRCIKEVLRLHPPAMMLLRHARRSFTVRTREGDEYEVPAG
chr3	8473557	-1		chr3_8473557_-1	CYP709E16_3D_Triticum_aestivum(wheat)	98.33	60	QMTMVLFETLRLYSPALFMQRKTVADMTVGSIKLPKGMAIVIPIPIMHRDKEVWGDDADE
chr3	15374337	-1		chr3_15374337_-1	CYP81A50_3D_Triticum_aestivum(wheat)	100	55	RDPSVWDDPEEFRPERFGVNSADGQGQQGMMLPFGMGRRRCPGESLALRTMGLVL
chr3	21128091	-1		chr3_21128091_-1	CYP84A98_1B_Triticum_aestivum(wheat)	91.67	60	VVKEALRMHPPIPVLLHEAAKDCVVGGYSVPRGSRVLVNAWAINRDGGAWKDGDTFRPAR
chr3	28931059	1		chr3_28931059_1	CYP71C10	75	56	PGRMLKSSYLKDLQMKGNDFQFLPFGAGRRICPGINLGIANVELMLANIMNHFDWE
chr3	28935827	1		chr3_28935827_1	CYP71C116_3D_Triticum_aestivum(wheat)	98.33	60	YLRAVIKESLRLRPLAPLLAPHLAMADCIIDGYIVPAGTRVVINAWAIGRDPSSWEYAEE
chr3	28930974	1		chr3_28930974_1	CYP71C10_3B_Triticum_aestivum(wheat)	95.56	45	ADCTIDGYMVPAGTRVVVNAWAIGRDSSSWEDAEEFIPERFTNEGERFS
chr3	29247601	-1		chr3_29247601_-1	CYP71C116_3D_Triticum_aestivum(wheat)	95	60	YLRAVIKESLRLHPLAPLLAPHLAMADCIIDGYIIPAGTRVVVNAWAIGSDPSSWEYAEE
chr3	29261275	-1		chr3_29261275_-1	CYP71C10	100	60	LRLYPVAPLLAPHLAMADCTIHGYMVPAGTRVVVNAWAVGRDSSSWEDAEEFIPERFTDE
chr3	37243952	1		chr3_37243952_1	CYP71V8	96.67	60	KETFRLHPPAPILVPRESTEACEINGYVIPAKTRVIINSWAIMRDPQYWEDAEEFRPERF
chr3	37248603	1		chr3_37248603_1	CYP71AF6	88.33	60	LVIKETLRLHPTGPLLLPRECREPCRVLGFDVPQGAMVLVNAWAIGRDAASWGADADEFR
chr3	37251501	-1		chr3_37251501_-1	CYP71U5	89.47	57	TLRLHPAGMFHRASQEDCRVMGYHIPKGTSVVINSFAVGTDPAHWGEDAAEFRPERF
chr3	39564999	-1		chr3_39564999_-1	CYP71V29_3D_Triticum_aestivum(wheat)	100	59	IDQCELEGYTVPAKSRVIINAWAIGRDPKYWEAPEEFRPERFEDSTVDFTGSSYEFLPF
chr3	42684506	1		chr3_42684506_1	CYP71Y23_3D_Triticum_aestivum(wheat)	89.47	57	AGCCVLGYDVPQGTQVVVNAWALGRDERYWPDSPEEFRPERFETSEVDFRGPDFELL
chr3	42686313	1		chr3_42686313_1	CYP71Y23_3D_Triticum_aestivum(wheat)	89.47	57	AGCCVLGYDVPQGTQVVVNAWALGRDERYWPDSPEEFRPERFETSEVDFRGPDFELL
chr3	42718334	1		chr3_42718334_1	CYP71Y23_3D_Triticum_aestivum(wheat)	98.31	59	TLRLHTPLPLLLPRECREEAGCRVLGYDVPQGTQVLVNAWALSRDERYWPDAPEEFRPE
chr3	44275467	1		chr3_44275467_1	CYP84A107_3D_Triticum_aestivum(wheat)	98.33	60	ETLRLHPPIPLLNHENAKDCVVGGYSVPRGSRIMINVFAIGRDPSAWKDADAFRPSRFMA
chr3	44527320	-1		chr3_44527320_-1	CYP704A167_3D_Triticum_aestivum(wheat)	90	60	LWVVASQDVKCCFSDDTLPDGHAVRRGDMVNYQPYAMGRMKFLWGDDAEEFRPERWLDDD
chr3	44532564	1		chr3_44532564_1	CYP704A166_3D_Triticum_aestivum(wheat)	88.33	60	LWVVASQDVKYCFSDDTLPDGHAVRRGDMVNYLPYAMGQMKFLWGDDAEEFRPERWLDDD
chr3	44593333	-1		chr3_44593333_-1	CYP704A164_3D_Triticum_aestivum(wheat)	100	55	QDVKCCFSDDTLPDGHAVRRGDMVNYQPYAMGRMKFLWGDDADEFRPERWLDDDGV
chr3	45768985	1		chr3_45768985_1	CYP99A19_Setaria_italica_Seita-6G101900	73.58	53	KEAMRLHPVVPLLLPRVCRETCDVHGHRVEEGTRVFVNAWAMARSPEYWQDAE
chr3	45786576	1		chr3_45786576_1	CYP99A19_Setaria_italica_Seita-6G101900	73.58	53	KEAMRLHPVVPLLLPRVCRETCDVHGHRVEEGTRVFVNAWAMARSPEYWEDAE
chr3	49114010	-1	CYP51	chr3_49114010_-1	CYP51H48_3D_Triticum_aestivum(wheat)	98.33	60	MDQATILVVAACLAAATAALILRRPRNGKPPGGVALLPPVASGVSAIAALGTLVTKGLPAVIHDLHGELGSVFTVSLLGLKKVTFLVGPEVTTHFFKGSESEIRQSDIYKITVPIFGRGVLFDVDLPTRSRQISFLSDAIKPVNLRGHVDSMVREVEDYFGKWGEHGTVDLKQELGLVLMRIANRCLLGEQIGDNMFDEVTHLLHELFENGLHMTSLFFPYLPIPPHRRRDAARAKLGEIFHEAVRARRASGRAENDVLQKLVESRYADGRPVTESEIAGLLIGMIFAGQHTSASAAIWTGACLLSHGDGRHLVAAVEEQKQIIARHGRERVDYDVLREIGILRCCIMEALRMHAPANVIIREANKSFSLQARDGGRYAIPKGHTLVTSPAVNNRLPHI…
chr3	51511903	-1		chr3_51511903_-1	CYP71K43_3A_Triticum_aestivum(wheat)	98	50	MLKRECGGPRQQLLGFDVPQGAMVLVNAWAMGRDPAHWDSAEEFVPERFD
chr3	51666016	1		chr3_51666016_1	CYP71K43_3A_Triticum_aestivum(wheat)	89.58	48	LIRECGPRQQVLGFDVPQGAMVLVNAWAMGRDPAHWDSAGEFLPERF
chr3	61271793	-1		chr3_61271793_-1	CYP90D14	96.67	60	VITETLRIGNIISGIMRKAVRDVEVKGHLIPKGWRVFMYFRSVHLDDMLYEDPCKFNPWR
chr3	73246683	-1		chr3_73246683_-1	CYP96E1_ortholog_Beckmannia_syzigachne	86.67	60	HAALSESLRLYPPVPFEHKAGARADTLPSGPAVRPSRRVIVSFYSMGRMESVWGEDCLEF
chr3	73575472	1		chr3_73575472_1	CYP96E1v3_Saccharum_spontaneum	92.16	51	GKDCLEFRPERWLTAAGRLRHEPSYKFVAFNVGPRTCLGKDLAFTQMKAVV
chr3	74057077	-1		chr3_74057077_-1	CYP96D4	91.67	60	WISKSGRLRHEPSYKFLSFNSGPRSCLGKDLGLSNMKMAAASIIYNFKVELVEGHAVMPE
chr3	77137921	-1		chr3_77137921_-1	CYP71F44_U_Triticum_aestivum(wheat)	98.33	60	ELQYMQMVIKEVLRLHPPSPLVARAAREDCQIMGYDILKGTTVYVNVYAISRDPKYWENP
chr3	88862410	-1		chr3_88862410_-1	CYP734A-fragment1_Beckmannia_syzigachne	98.18	55	CRFP*QLGMILNETLRLYPPAVATVRRAKSDVVLGGYHIPRDTELLIPIMAVHHDARLWG
chr3	97387118	1		chr3_97387118_1	CYP73A210_Beckmannia_syzigachne	100	60	LANDPKRWVRADEFRPERFLEEEKAVEAHGNDFRFVPFGVGRRSCPGIILALPIIGITLG
chr3	115591507	1	87% to CYP710A8_3D	chr3_115591507_1	CYP710A8	88.02	167	LGSAVRMIRDPTGFRDVQAAWARESGAELTVDFLFGCFIIFIRDSELSHRVFANVCPDAFHLLGHPFGKKLFSHHNLIYMFGKDHKDLRRRITPNFTLSALSTYAAIQQRVILAQLRRWLDQSAATCEAMPIWVPCRDMDLETSQTVFMGSYLTEKERERFAKDYAL
chr3	115872079	1	99% to CYP710A8_3D	chr3_115872079_1	CYP710A8d	99.8	510	MAELLRPADFFDLRAAAPFLAAAVALYFLAEQLSYLRKKGPLPGPSLVVPFLGSAVRMIRDPTGFWDVQAARARESGAGLAADFLFGRFIVFIRDSELSHRVFANVRPDAFHLIGHPFGKRLFGDHNLIYMFGEDHKDLRRRITPNFTPRALSTYAAIQQRVILAHLRRWLDQSAATGEAMPIRVPCRDMNLETSQTVFVGSYLTEKARERFAKDYALFNLGLMTVPVDLPGFAFRRARLAVARLVRTLGECARKSKARMRAGGEPECLVDYWMQETLREMDEAAAAGLPPPAHTDDEEFGGFLFDFLFAAQDASTSSLCWAVSALDSHPDVLARVRAEVAAAWSPESGKPITAEKIQGMTYTQAVAREVVRYRPPATLVTHVAGEPFQLTEWYTVPKG…
chr3	133387872	1		chr3_133387872_1	CYP71T45_3B_Triticum_aestivum(wheat)	100	60	YLRAVIRETLRLHAPLPLLLPRETLEDTELLGYRVPARTRVVVNAWAIGRDPATWERAEE
chr3	133440626	1		chr3_133440626_1	CYP71T45_3B_Triticum_aestivum(wheat)	98.33	60	YLRAVIRETLRLHAPLPLLLPRETLEDTELLGYRVPARTRVVINAWAIGRDPATWERAEE
chr3	133696472	1		chr3_133696472_1	CYP71T48_Beckmannia_syzigachne	88.14	59	LRLHPPIPLLVPREPQNDAEILGHHVPAGTRVVINAWAVGRDPAAWERAEEFAPERFLDG
chr3	323360052	-1		chr3_323360052_-1	CYP72A585_3B_Triticum_aestivum(wheat)	85	60	VTMILYEVL*LYPPVVAFIRKTYKEMEIGGITYPAGVLIELPVLLMHHDPDIWGSDVHEF
chr3	323405811	1		chr3_323405811_1	CYP72A587_3D_Triticum_aestivum(wheat)	100	59	QVTMILYEVLRLYPPAVTLNRKTSRQMQIGGITYPAGVLLELPIIMVHHNPDVWGKDVLE
chr3	323439971	1		chr3_323439971_1	CYP72A586_3D_Triticum_aestivum(wheat)	100	60	LRLYPPATLFSRKTYKEMEIGGITYPAGVMVELPVMFIHHDQHIWGSDVHEFKPDRFADG
chr3	323671302	1		chr3_323671302_1	CYP72A584_3D_Triticum_aestivum(wheat)	100	59	VWGADAHEFRPERFSEGVSKASVDAPAFFPFGWGPRICVGQNFALLEAKMGLAMILQRF
chr3	444758602	-1		chr3_444758602_-1	CYP71X39_6B_Triticum_aestivum(wheat)	79.66	59	MLRLYPAVPLLLLRECCKTCKVMGYDVPKGATVFVNMWAIGMDSKHWVVAEMFKPERFES
chr3	445864461	1		chr3_445864461_1	CYP98A12_3D_Triticum_aestivum(wheat)	100	55	LEFRPERFLHDNIDIKGCDYRVLPFGAGRRVCPGAQLGINLVASMIGHLLHHFTW
chr3	446220517	1		chr3_446220517_1	CYP94D96_3B_Triticum_aestivum(wheat)	100	54	WLMTYCAFAMARLEGVWGKDCEEFRPERWLDEEGAFRPESPFKYAVFHAGPRMC
chr3	446223890	1		chr3_446223890_1	CYP94D97_3D_Triticum_aestivum(wheat)	100	60	LEELWGADCAEFRPERWLDEEGAFRPESTSKYPVFHAGPRMCLGKEMAYIQMKSIVAGVL
chr3	446226909	1		chr3_446226909_1	CYP94D98_3A_Triticum_aestivum(wheat)	98.33	60	DDVLPDGTFVGKGWQVSYSAYAMARLEEIWGNDCAEYRPERWLDEEGAFRPESSFKYPVF
chr3	454716402	1		chr3_454716402_1	CYP704A161_3A_Triticum_aestivum(wheat)	97.67	43	ITADLSDDICLLGVFQDNKECFSDDVLPNGFSVGKGDIVFYAPYAMGRMERLWSEDAIA
chr3	454757090	1		chr3_454757090_1	CYP704A160_3D_Triticum_aestivum(wheat)	98.15	54	VLQDNKECFSDDILPNGFSVGKGDIVFYAPYAMGRMERLWGEDAIVFRPERWLNERG
chr3	456359531	-1		chr3_456359531_-1	CYP73A93	93.33	60	RLRMAIPLLVPHMNLHDAKLAGYNIPAESKILVNAWFLANNPEQWKRPDEFRPERFLEEE
chr3	483096510	1		chr3_483096510_1	CYP86A155_3D_Triticum_aestivum(wheat)	100	58	SAITYSIYSVGRMESIWGKDCVEFRPERWLSADGSRFEPVKDAYRFVAFNGGPRTCLG
chr3	486205709	1		chr3_486205709_1	CYP76H20	89.66	58	KYLQAIVKEVFRLHPPAPLLLPRQAEATTELRGYMVPKGARVMVNVWAIGRDGELWSE
chr3	486216046	1		chr3_486216046_1	CYP76H42_3D_Triticum_aestivum(wheat)	100	59	NELWSEPERFLPERFLGKDMDYRGRDFELLPFGSGRRICPGMPLAVRMVHLMLATLLYR
chr3	486435050	-1		chr3_486435050_-1	CYP94C72_Zea_mays	100	53	YESMRLFPPVQFDSKFAAGDDTLPDGTAVAKGTRVTYHAYAMGRMESVWGPDC
chr3	489908917	-1		chr3_489908917_-1	CYP728A5	75	60	MKYTWSAAMETLRLVPPVFSLLKRAVEDVEFDGHLIPKGWQVLGAMNMTQWDPAIFAEPS
chr3	498157691	1		chr3_498157691_1	CYP81A49_3D_Triticum_aestivum(wheat)	100	60	LRLYPAAPLLAPHESSADCSLHGYHVPAGTMLLANAYAIHRDPSVWDDPEEFRPERFDVN
chr3	541339771	-1		chr3_541339771_-1	CYP99A41_3D_Triticum_aestivum(wheat)	100	60	LNPVLPLLLPRLCGATCEIGGFEVAKGSKVIVNAWAMARSPEHWPDAEEFRPERFDGGAA
chr3	586967585	1		chr3_586967585_1	CYP96B3_Oryza_sativa	86.05	43	SGHEVRPGDKILVSLYAMGRMEAVWGKDCREFRPERWIGEDGK
chr3	587071913	-1		chr3_587071913_-1	CYP96B18_orthologv3_Saccharum_spontaneum	88.1	42	GHEVRPGDKILVSLYAMGRMEAVWGMDCREFRPERWIGEDGK
chr3	596575562	-1		chr3_596575562_-1	CYP92A152_3D_Triticum_aestivum(wheat)	100	60	LPYIEAIVKESMRMHPIVPLLIPRMAREDATIDGYDVPKGARVLINVWAMGRDPELWDAP
chr3	598262668	1		chr3_598262668_1	CYP94E11_3B_Triticum_aestivum(wheat)	90	60	FADYSAYAMGRMPRLWGDHCLEFRPERWLKGDRGEFVSTDAARYPVFHAGPRACLGKEMA
chr3	598356683	1		chr3_598356683_1	CYP94E11_3B_Triticum_aestivum(wheat)	72.88	59	GRCRPAGSRTTLRMRWGRMPRLWGDDCREFRPERWLDGDRGDFVAADAARYPVFHTGPR
chr3	604835825	-1		chr3_604835825_-1	CYP71AA16_7D_Triticum_aestivum(wheat)	84	52	KETFRLHPPVPLLMPRLCTEQTKVMGYDIPEGTTVFVNVSAIGRDEKSWTDAN
chr3	605067972	-1		chr3_605067972_-1	CYP96B2_Oryza_sativa	76.67	60	ALRLYPPVPFEHKGVVAAETLPSGHEVRPGDKIIVSLYAMGRMEAVWGKDCWDFRPERWI
chr3	615460430	-1		chr3_615460430_-1	CYP81L1_3B_Triticum_aestivum(wheat)	96.67	60	METLRLHPPTPLLVPHESSIDCTVSGFYIPKGTMLLVNTSAIHRDPKIWDKPTNFIPERY
chr3	615481816	-1		chr3_615481816_-1	CYP81L1_3B_Triticum_aestivum(wheat)	96.67	60	METLRLHPPTPLLVPHESSIDCTVSGFYIPKGTMLLVNTSAIHRDPKIWDKPTNFIPERY
chr3	615637700	1		chr3_615637700_1	CYP76A62_Physalis_alkekengi	69.64	56	PYLKAVVKETLRLHPPTPLLLPRETLEDTRLLGYDVPAGTRVLIHAWAIGRDPATWGSRA
chr3	621386276	-1		chr3_621386276_-1	CYP71E32_3D_Triticum_aestivum(wheat)	98.31	59	RDPASWPDDPEDFKPERFERSEIDFKGGHFELTPFGAGRRICPALAMSTATVEFTLANL
chr3	621418910	1		chr3_621418910_1	CYP71E35_3B_Triticum_aestivum(wheat)	94.55	55	YLKMVVKETLRLHPPAPMLLPREAMRDIRIGGYDVLAKTRIYMNVWAIGRDPATW
chr3	621443787	1		chr3_621443787_1	CYP71E34_3D_Triticum_aestivum(wheat)	100	60	VKETLRLHPPATMLLPREAMRDIQIGGYDVPAKTRIYVNAWAIGRDPTSWPDDPEEFKPE
chr3	621749614	-1		chr3_621749614_-1	CYP71E34_3D_Triticum_aestivum(wheat)	98.33	60	YLKMVVKETLRLHPPATMLLPREAMRDIQIGGYDVPAKTRIYVNAWAIGRDPASWPDDPE
chr4	2032193	1		chr4_2032193_1	CYP72A590_4D_Triticum_aestivum(wheat)	100	60	LHHDKDVWGADADEFRPERFANGISKAGASADAPAFFPFGWGQRTCVGQSFAMLEAKMGI
chr4	2063448	-1		chr4_2063448_-1	CYP71Y26_4D_Triticum_aestivum(wheat)	100	60	IRETLRLHTPVPLLLPRQCQEPCQVLGYDVPRGTHVLVNVWALAHDERYWHDPPDEFRPE
chr4	2890646	-1		chr4_2890646_-1	CYP96B30	76.27	59	EETKSLVSLKAALYEILRLYPSAPIERKIVAADDIMPSGHKVHASDTILISLHSMGRMED
chr4	6700038	1		chr4_6700038_1	CYP71K47_6B_Triticum_aestivum(wheat)	95.65	46	LRQCRSPCQVLGYDVPAGAMVLVNSWAIARDPAHWDALEEFLPERF
chr4	13685528	1		chr4_13685528_1	CYP98A40	98.31	59	DFQKLPYLLAVVKESLRLHPATPLMLPHKASASVKVGDYNIPKGADVTVNVWAIARNPD
chr4	17046946	-1		chr4_17046946_-1	CYP71V11	89.66	58	MMVNAWATSRDPWYWKDPEEFSPERFEEDGAVDFHGLHFEFTPFGAGRRMCPGYNYGL
chr4	17049483	-1		chr4_17049483_-1	CYP71V11	93.33	60	EIGGYVVPAKSRMVVNAWAISRDPRYWKDPEEFVPERFEEDGAVDFHGLHFEFTPFGAGR
chr4	76564729	-1		chr4_76564729_-1	CYP714C18_4D_Triticum_aestivum(wheat)	100	60	ITMVVQETLRLYPPGSLIMREALKDFKLGGLDIPRGTVIQTAIAMLHLDKDVWGQDAGEF
chr4	105632533	1	CYP51	chr4_105632533_1	CYP51G1_4A_Triticum_aestivum(wheat)	100	60	MDLLSDAQPQWLLAGAALLLATVAFLRVLLGSGGRGKRAPPTIPGAPVVGGLLRFLRGPIPLIRAEYARLGPVFTVPILTRRITFLIGPDVSAHFFKSNESDMSQQEVYRFNVPTFGPGVVFDVDYQVRQEQFRFFTEALRANKLRSYVDQMVAEAEEYFSKWGESGTVDLKYELEHLIILTASRCLLGREVREKLFDDVSALFHDLDNGMQPISVIFPYLPIPAHRRRDQARTRLAEIFATIIKSRKASGQSEEDMLQCFIDSKYKNGRQTTESEVTGLLIAALFAGQHTSSITSTWTGAYLLKFQQYFAEAVEEQKEVMKRHGDKIDHDILAEMDVLYRCIKEALRLHPPLIMLLRQSHSDFSVTTREGKEFDIPKGHIVATSPAFANRLPHIFKNP…
chr4	105647166	1		chr4_105647166_1	CYP714C19_4D_Triticum_aestivum(wheat)	100	55	RPDRFTNGAAAACEPSHMYLPFGHGPRICAGQNLAMVELKVVLVRLLSKFAFSPS
chr4	119216454	-1		chr4_119216454_-1	CYP94C109_4D_Triticum_aestivum(wheat)	100	51	AAGEKTRTASKTTYEQLKSLHYTHAVLHENMRLFPPVQFDSKFCAADDVLP
chr4	308951719	1		chr4_308951719_1	CYP714B13_Beckmannia_syzigachne	98.33	60	VIQETLRLYPAGAFVSRMALQELKLGGVHIPKGVNIYIPVSTMHLDPKLWGPDAKEFNPA
chr4	340754978	1		chr4_340754978_1	CYP71V5_Oryza_sativa	78.33	60	AGTGTLASSLDWGVSELMRNPRVMDKLQREIRVAFRGRATINEGDIEASELPYLKLFIKE
chr4	340831479	1		chr4_340831479_1	CYP71V9v1	83.93	56	SRLVVDAWAIGRDPRYWEDAEEFKPERFEDSSVDFTGSNYEFLPFGAGRRMCPGIS
chr4	365194076	-1		chr4_365194076_-1	CYP71C9_4A_Triticum_aestivum(wheat)	98.08	52	KETLRLHPPVPLMIPHFSLDACTVDGYTIPANTRVVINAWALGRHSGYWENE
chr4	357221295	-1		chr4_357221295_-1	CYP72A591_4D_Triticum_aestivum(wheat)	100	59	QVTMILYEVLRLYPPSIHFSRKTCKKVLIGDKRYPAGMMIELSVLLMHHDPDIWGSDVHE
chr4	374647122	1		chr4_374647122_1	CYP71Y25_4D_Triticum_aestivum(wheat)	98.33	60	PQGTQLLVNVWALGRDKRYWPDGPEEFRPERFEDEDAVDFKGNDFSFLPFGAGRRMCPGM
chr4	389266555	1		chr4_389266555_1	CYP75A88_4D_Triticum_aestivum(wheat)	100	93	PYLRAICKETFRKHPSTPLNLPRISTEPCKVQGYHIPKGTRLVVNIWAIGRDPAVWPEPERFDPGRFMTEEGRKVEPMGSHFQLIPFGAGRRM
chr4	408313251	1	CYP74	chr4_408313251_1	CYP74A98_4A_Triticum_aestivum(wheat)	100	60	AKADMNIESHDAVFAVKKGEMLFGYQPCATKDPRVFGSTAREFVGDRFVGEGSKLLQYVY
chr4	408411769	-1	CYP74	chr4_408411769_-1	CYP74A1_4D_Triticum_aestivum(wheat)	100	60	KKGEMLFGYQPCATRDPRVFGSTAREFVGDRFVGEEGRKLLQYVYWSNGRETESPSVDNK
chr4	410642101	1		chr4_410642101_1	CYP94D100_4A_Triticum_aestivum(wheat)	100	53	AGFDLDELREMHYVHAAITESMRLYPPVPVNSLQAKAADVLPDGTAVGAGWFV
chr4	410659800	1		chr4_410659800_1	CYP94D99_4A_Triticum_aestivum(wheat)	93.33	60	DVLPDGTAVGAGWFVAYNSYAMGRMEPVWGEDARAYRPERWLDPAEGTFQPDSPFRYIAF
chr4	420415352	1		chr4_420415352_1	CYP71C161_4D_Triticum_aestivum(wheat)	100	43	ASWKDAEEFVPERFMEEAMDATCDLQGNDFRFLPFGSGRRMCP
chr4	421825080	-1	CYP74	chr4_421825080_-1	CYP74A97_4D_Triticum_aestivum(wheat)	98.33	60	SHDAVFAMKKGEMLFGYQSCATRDPRVFGSTAREFVDDRFVGEEGRKLLQYVYWSNGWET
chr4	453910368	-1		chr4_453910368_-1	CYP99A41_3D_Triticum_aestivum(wheat)	90.16	61	GGFEVAKGTTVIVNAWAMARSPEHWPDAEEFRPERFDGGAVDFKGGLQLEYLPFGSGRRM
chr4	460907039	-1		chr4_460907039_-1	CYP704B12v1_Zea_mays	96.67	60	YDGLGKLVYLHACVTETLRLYPAVPQDPKGIAEDDVLPDGTKVRAGGMVTYVPYSMGRME
chr4	466999029	-1		chr4_466999029_-1	CYP728C13	92.68	41	MKYMWKVAMETLRTIPPVFGSFRTTTKDIEYQGYHIPKGWK
chr4	471809098	-1		chr4_471809098_-1	CYP89J16_4B_Triticum_aestivum(wheat)	95	60	LDGQRVTAGTIVQFPLERLGRDKTSWADPDEFQPERFLASGGGNGVSLVAVAGSAGEIRM
chr4	482971713	-1		chr4_482971713_-1	CYP711A68_4D_Triticum_aestivum(wheat)	100	59	PYLEQVLKETMRYFPGSPVVSREATADVEIGGYFLPKGTWVWLATAVLGRDPEQFPEPE
chr4	482973865	-1	100% to CYP711A68_4D	chr4_482973865_-1	CYP711A68_4D_Triticum_aestivum(wheat)	100	529	MEGAGAALLCSQVGSPLASFPAMLFTVAAMAAGAFAVYFYAPSWRLRRVPGPLAYGLVGHLPLLDKHGSQAFGVLAKKYGPIYRFYMGRQPLVVVADPELCREAGIKKFKSIVDRSVPVTIASSPIHYKSLLFTKGSTWQAMRNVIISIYQPSHLASLIPAIQPYIEQAGNLFCPGEEITFSDISIRLFTDVIGQAAFGVDFGLTKDTDDAEKIIHDAPRDFIQKHLYATTSLKMDLSGSLSMLVGTFLPALQKPLRQLMLRVPGSMDRRMDETNAALSGELDAIVAERTAQADRGQKNFLSVLLNGIDTSDAMRKLFTPDYVSALTYEHLLAGSGTMSFTLSSLVYLVSAHPEVEEKLLQEIDAFGPKDVVPDADDLRTKFPYLEQVLKETMRYFPGS…
chr4	492605539	-1		chr4_492605539_-1	CYP78A206	100	60	HLVPAGTTAMVNQWAMSRDPEVWDAPLEFRPERFLAGGEAPDVSVLGADGRLVPFGSGRR
chr4	500817413	1		chr4_500817413_1	CYP96B9_Oryza_sativa	85	40	LPSGHEVRPGDKIMVSLYAMGRMEAVWGKDCREFRPERWIG
chr4	500837218	1		chr4_500837218_1	CYP96B1	95	60	FSYCMARMEGVWGKDCMEFRPERWVTADGKLRYEPSYKFISFNAGPRTCLGKEMAFVQMK
chr4	501780240	1		chr4_501780240_1	CYP96B20	96.55	58	RVWGADCREFRPERWISEDGKLRYVPSNKFVAFNSGPRTCLGKEMVLVQMKVTVAAVA
chr4	510451338	1		chr4_510451338_1	CYP71X38_4D_Triticum_aestivum(wheat)	98.31	59	AGSETSATTLQWAMSELMRHPNVMRKAQAKVRSNCQGKHKLTEDDLADLKYLQLIIKET
chr4	510869198	-1	CYP51	chr4_510869198_-1	CYP51H42_4D_Triticum_aestivum(wheat)	100	60	IISKYKNQIGYDAFSEMDTLHRCIKEALRMHTPAQMLARKAHKKFKVQTKEGKEYDIPEG
chr4	512743983	-1		chr4_512743983_-1	CYP73A205_5A_Triticum_aestivum(wheat)	100	60	DPKRWVRADEFRPERFLEEERAVEANGNDFRFVPFGVGRRSCPGIILALPIIGITLGRLV
chr4	515597029	1		chr4_515597029_1	CYP71Y27_4D_Triticum_aestivum(wheat)	98.33	60	ELPYLHLVIREVLRLHAPTPLLIPRECREPCQVLGYDVPRGTQVFVNAWAIARDERYWPD
chr4	517647479	1	CYP51	chr4_517647479_1	CYP51H41_4D_Triticum_aestivum(wheat)	100	60	IISKYKNQIGYEALSEMDTLHRCIKEAIRMHTSAPVLVRKAHTKFRVHTKEGEEYDIPGG
chr4	520582851	1		chr4_520582851_1	CYP71E46_4D_Triticum_aestivum(wheat)	100	60	RMVLSETLRLHPPATLLVPRETLRRVQVAGYDIPAKTQVIVNAWAISRDPSAWKDPEEFN
chr4	520603656	1		chr4_520603656_1	CYP79A146_4D_Triticum_aestivum(wheat)	100	60	YLKSCIREAFRIHPYHAFNPPHVAMADTTVAGYTIPKGSHVILSRFGLGRNPKIWVEPLE
chr4	521976083	-1		chr4_521976083_-1	CYP98A107_4D_Triticum_aestivum(wheat)	100	57	YLLAVVKVGAYNIPKGADVTVNVWAIARNPDVWSNPLEYRPERFLEESIDIKGGDFR
chr4	521993993	-1		chr4_521993993_-1	CYP98A39v3	95.12	41	IPKGADVTVNVWAIARNPDVWSNPQEYRPERFLEKSIDIKG
chr4	522507192	-1		chr4_522507192_-1	CYP87B39_7B_Triticum_aestivum(wheat)	95	60	ETAGYTIPAGWLVMISPISVNLNPELYEDPLAFNPWRWQDESKKSTLLKNFMPFGGGLRL
chr4	522527996	-1	CYP51	chr4_522527996_-1	CYP51H40_3B_Triticum_aestivum(wheat)	85	60	MYVMDWAAASTTLFSVVLCSIVTVVAAKLLKAKNKLNNHVYTRPLPPVVNVLALIPPLLNKGLQATIQDLYTKFGSVFTINLLRPKVTLLIGPEVSAHFFQGLDSEISWGNLLEFTVPMYGQEVGYGVDTATRNEHSNFIIQALQPSKLRSHVDPIFQEVEAYFAKWGQDGTVDLKHELEQVLMLTSSRCLLADVVRHQMILTEIYSLLHELENGANIISFLFPYIPTPTNRRRDKAHIKLKEIFSAAVRSRSQAQEDALQRPIDSKYKDGRPTAIAEISGMMIILISTSRHTSSHTSIWTGARLLSNTKFLMAAVEEQKHIIRNYGNQIDYHAMSEMDTLHNCIKEALRMHPAGPVLFRKAHKTFKVHTKEGNEYDIPGGHNVTIPTVFNSKLPYIYR…
chr4	523081869	1		chr4_523081869_1	CYP89B39_4D_Triticum_aestivum(wheat)	100	60	EEVSEEETHGMPYLKAVVLEGLRKHPPGHFVLPHRAAEDMEVGGYLIPKGASVNFMVAEM
chr4	523260025	1		chr4_523260025_1	CYP71P9_4D_Triticum_aestivum(wheat)	100	59	IKETFRLHPVVPLLVPRESIVACTLGGYDIPAKTRIFINTFAMGRDPQIWEDPLEYWPE
chr4	524777712	-1	CYP51	chr4_524777712_-1	CYP51H49_4D_Triticum_aestivum(wheat)	98.33	60	MDITFPPGAYFSIAVIFLTVIITKVIVRRIVAPRPEKGSLQPPIASGASLVAALPTILTKGLHPVLHDLHAKLGSVFTINLFGLKKVTLLVGPEVTSHFFQAKNSELCHPDMYKFTIPIFGKGVIFDVDFETRNRQIRFAIDAMKPTQLRSKVDYMVHEVQDYFSKWEQEGIIDLKHELAEVLMLIASRCLLGKEVREKMFEEVSVLINDLCKNGMHFISLFFPYIPIPAHRQRDKARAKLGHIFHEIVRSRKISGQVEDDVLQKLIDSKCMEDGRSMTESEITGLLISLLFAGQHASSSAASWAGACLISHEKYLAAAVEEQQKIIGKHGQHVDYSILLEMGTLHSCIKEAIRMHSPSAMVMRHVKKNFTVQTREGYSYEIPEGHTVATSIVVGNQLP…
chr4	524867580	-1	86% to CYP710A96_4B, 84% to CYP710A96_4D	chr4_524867580_-1	CYP710A96_4B_Triticum_aestivum(wheat)	86.21	58	KRNFLAFSAGAHQCIGQRYALNHLALFLTLFVSVVDCKRHTTHGCDEPVHMCPTSCPR
chr4	524955940	-1	99% to CYP710A96_4D	chr4_524955940_-1	CYP710A96_4D_Triticum_aestivum(wheat)	99.61	512	MMELLPLPLGVGFMGYVRAAAPLVAAAVAFYFLVEQLSYHRNKGVLPGPSLVVPFLGSIVPMIRDPTGFWEVQAARARDSGAGLAADFLVGRFILFVRDSELSHRVFANVRPDAFHFVGHPFGKKLFGEHNFIYLFGDEHKDLRRRMAPTFTPRALSTYAAIQQRIVLAHIRRLLDETSPATPAPIRVACRDMNLETSQTVFVGPYLTQEARARFGEDYAVFNVGVIALPVDLPGFAFRRARLAVGRLVRTLAECVGQSKARMRAGGEPECLVDYWMQGLVKEMDEAAAAGRPLPKHTADEDLGGYLFDFLFAAQDASTSSLCWAVAALGSHPDVVARMRAEVSAVWSPESGEPITPDKFMQLKYTHAVAREVVRYRPPATLVPHIAAEPFKLTEWYTV…
chr5	3898806	1		chr5_3898806_1	CYP729A8	80.85	47	HRVANRDVDHNGYTIPAGWSVLVWVRSLHTDPGNYENPLTFNPDRWDV
chr5	4817232	1	CYP51	chr5_4817232_1	CYP51H35_5D_Triticum_aestivum(wheat)	98.33	60	MDLASLTAVWWAVALLFITVLVTKISRARVTTVDLHRTTGQLPPLVNGVALLKLLPTLLNKGLPAMVNDLYVKYGSVFMVSSFGVKVTLLIGPEVTAHFFQGLESEISHGNLFEFTVPMFGEAVGYGRDTATRTEQMRFHIEALRPSRLRSHVYPMLQEVEGYFAKWGEEGIVDLKLEFEKLLMLISSRCLLGKEVRENMFDEVYTLFHEIEDNGVTLISFLFPYLPTPANRKRDKARIRLTQILSDVVDSRKNSGRVEDDTLQKLIDSKYKDGRPTTVEEVVGLIIGLLFAGKHTSSHTSTWTAACLLSHPTFLRAAIEEQQQISSKYKDMGLDYNAFIEMDTLHRCIKEALRKHPPTPMLVRRAHKQFMVKTKEGKEYDIPQDHIVATPTIVTNNIS…
chr5	4820395	1	CYP51	chr5_4820395_1	CYP51H13_5A_Triticum_aestivum(wheat)	98.33	60	MDLTSLTAMWWAIALLFITVLATKITRARITNIDPQRTTGQLPPMVNGLALLGLLPTLLKKGLPPMVNYLYVNYGSVFTVSCFGVIKVTLLIGPEATTHFFQGLESEISHGNLLEFTVPMFGKAVGYGRDTATRMEQMRFHSEALRASRLRSHVSPMLQEVEDFFAKWGEKGVVDLKLEFEQLLMLISG*CLLGKEVRENMFDEVYTLFREIEKGVTLISFLFPYLPTPANWQRDRARIRLTEILSNVVESRKSSGRVEEDTLQKLIDSKYKDGRPTTVEEVVGLIIGLLFAGKHTSSHTSTWTGARLLSHPAFLRAAIEEQHQVAKKYKDGLEYNAFLEMDTLHNCIKEALRKNPATPLLVRRVHKRFTVQTKEGQQYDIPQDYIVATPTIVNNNIPY…
chr5	4843426	-1	CYP51	chr5_4843426_-1	CYP51H37_5D_Triticum_aestivum(wheat)	100	60	MEMASSAKWFAVALVFITVILLRVIRGRRMAAAPASEKPPPPVVNGFALLGLLPRLLTMDLRTKINCLHDKYGSVFTVSPFGLTNVTFLIGPEVQSHFFQGLESEINHGNLLEFLVPMFGQEIGQGVDAATRTEQSRFYLDALKQSKLRRHLDPMLQEVESYFGKWGLEGVVDLKHEFEELLMLISSRCLLGKEVREKMFDEFYKLFRDVENGVNMISVFFPYIPIPANRRRDKARLKLIELLSGTVRSRKSSPSVEEDVLQRLIDSKYKDGRSTTETEVTGMIIALIFGGKHTSSLASTWTGACLLTHPKFLAAASQEQKEIMMKYKDKIEYDALLEMNTLHNCIKEALRLNPPTTMLVRKALKHFTVRTRQGQEYGIPKGHTLASPIIQNNYLPYIY…
chr5	6254457	-1	CYP51	chr5_6254457_-1	CYP51H38_5D_Triticum_aestivum(wheat)	98.33	60	MNMTAGWAAVWFTAGLVFITVIVLRIIRGTSIVAPTSGKPPPPVVNGLAFLGLLPRLLTIDLPAKINCLYSKYGSVFTVSPFGLCNVTFLIGPEVQAHFFQGLESEINHGNLLEFLVPMFGQEVGQGVDAATRTEQSRFYLDALKQSKLRRHLESMLQEVEGYFGKWGQEGIVDLKHEFEELLMLISSRCLLGKEVREKMFDEFYKLFRDVENGVNMISVFFPYIPIPANRRRDKARLKLIELLSETVRSRKSSVGAEEDVLQRLIDSKYKDGRSTTETEVTGMIIALIFGGKHTSSLACTWTGASLLTHSKFLAAASQEQKEIMMKYNNKIEYDALLEMNNLHSCIKEALRINPPTTMLVRKALKHFTVRTRQGQEYDIPKGHTLASPIIQNNNMPYI…
chr5	6320729	-1	CYP51	chr5_6320729_-1	CYP51H36_5D_Triticum_aestivum(wheat)	100	60	MDFTSLTVLWWAIALLFITVLATKISRASITNIDPQCTTGQRPPVVHEAALLKLVPTLLKKGLPAMINDLYVKYGSVFTVSCLGVTKVTLLIGPEVTAHFFQGLESEISHGNLFEFTVPMFGEAVGYGRDTATRTEQMRFHIEALRPSRLRSHVYPMIQEVEGYFAKWGEEGIVDIKLEFEKLLMLISSRCLLGKEVRENMFDEVFRLFHEIEDNGVTLISFLFPYLPTSANRQRDRARIRLTQILSDVVECRKSSGTVEEDTLQKLIDSKYKDGRPTTVAEVVGLIIGLLFAGKHTSSHTSTWTAACLLSHPTFLRAAIEEQQQINNKYKDKGLDYNAFIEMDTLHCCIKEALRKHPPTPMLVRMAHRRFTVKTIEGKQYDIPQDHIVASPTIVNNNI…
chr5	6391971	1	CYP51	chr5_6391971_1	CYP51H39_5A_Triticum_aestivum(wheat)	100	60	MDMLATRTTWLAIALFFITVVATKISRWKSNIHHLSTRPLPPVVNVLALLPSLFKKGFGDTINDLYTRYGSVFTINLLGPKITLLVGPDVSAHFFQGLESEISFGNFAEVTVPIFGQEVLYGVDAAIRSEQVNFMLDILKPSKLRSLVDPIFQEVEAYFAKWGQDGIVDLKHELEQVLMFISSRCLLGYEVREMMLKEVYSLFHELENGLNFFSYLFPYIPTPTNRRRDKAHIRLKEIFTTTIRSRRSSSRAEEDALQRLMDSKYKDGRSVTEGEISGMVMALIFAGKHPSSSTSIWAGAFMLSNTKVLIAAMEEQKHILSKYKNQIGYDALLEMDTLHRCIKEAIRMHTPAQMLARKAHKKFKVQTKEGKEYDIPGGHNVVIPTAFNNKLAHVYSDPH…
chr5	6406547	1	CYP51	chr5_6406547_1	CYP51H43_5B_Triticum_aestivum(wheat)	86	50	NKDKVGGKFPFTTFDGGRHMCPGMSFVYLQKKLIWSHLLRNFDLELISPFPEADLSKLGQGPKGKVMVSYK
chr5	8266832	-1		chr5_8266832_-1	CYP71C8_5D_Triticum_aestivum(wheat)	96.67	60	DCNIDGYDIPAKTRILVNGWAIGRDPTAWQRPEDFMPERFLQDGQEKSSNLGQDLKYLPF
chr5	8308783	1		chr5_8308783_1	CYP71C6_5D_Triticum_aestivum(wheat)	100	60	NGYTIPAGTRVIVNAWALARDPSHWERAEEFYPERFLQEGRDAEVDMYGKDIRFVPFGAG
chr5	8322156	1		chr5_8322156_1	CYP71C7_5D_Triticum_aestivum(wheat)	98.33	60	LRLHPPAPFLLPHFSTTDCKIDGYLIPSNTRVLVNAWALGRDPSSWERPEDFLPERFLQD
chr5	45387046	1		chr5_45387046_1	CYP72A592_5D_Triticum_aestivum(wheat)	100	60	DVWGEDADEFRPERFAEGVSKASGNSSSSAFFPFGWGPRICVGQNFALIEAKMALSRILQ
chr5	47963774	1		chr5_47963774_1	CYP729A8	88.33	60	MKYTAKVVEETIRMANVAPMVHRVANRDVEYGGYTIPAGWPVLVWVRSLHTDPVYYQDPL
chr5	66562187	1		chr5_66562187_1	CYP71W30_5D_Triticum_aestivum(wheat)	100	60	ALRLHPPGPLLLPRECRETCRVMGYDVPKGTKVVVNVWAMGRDDMYWGDAEAFRPERFEN
chr5	66679856	1		chr5_66679856_1	CYP71W31_5D_Triticum_aestivum(wheat)	100	60	ALRLHPPAALLLPRECRETCRVMGYDVPKGTKVFVNVWAMGRDDKYWGDAEAFRPERFEN
chr5	77525664	1		chr5_77525664_1	CYP92C11_5D_Triticum_aestivum(wheat)	100	59	LARLPYIDAVVKETMRLHPVGPLLVPHMAREDTLVAGYDVPAGARVLVNVWAIARDPAS
chr5	91565318	1		chr5_91565318_1	CYP81P6_5D_Triticum_aestivum(wheat)	100	60	ETLRMYPIAPHLAPHQASSDCVVAGGQYIIACGTMVLVDVYSMQRDPTMWDEPNRFIPER
chr5	91658402	-1		chr5_91658402_-1	CYP81P7_5D_Triticum_aestivum(wheat)	100	60	TETLRLYPLAPNLVPHEASRDCTITSGQYIIARGTMVLVDVYSIQRDPASWDDPDMFMPE
chr5	91665572	1		chr5_91665572_1	CYP81N20_5D_Triticum_aestivum(wheat)	100	60	KETLRLCPVGPIIPAHEAMEDCKVGGFHIQRGTMILVNAWAIHRDVKIWDAPEEFRPERF
chr5	91670295	1		chr5_91670295_1	CYP81N19_5D_Triticum_aestivum(wheat)	100	60	KETLRLCPVGPVIPAHEAMEDCTVGGFHVERGTMILVNAWAIHRDANVWDAPEEFRPERF
chr5	223580390	1		chr5_223580390_1	CYP94C110_5D_Triticum_aestivum(wheat)	100	50	RAEAGGDKPSTYQHLKSLQYTHAVLYENMRLFPPVQFDSKFSAAADVLPD
chr5	235656821	-1		chr5_235656821_-1	CYP94D101_5D_Triticum_aestivum(wheat)	100	51	DPFTFDALRDMQYLHAALTESMRLYPPVLIDSQSSAADDTLPDGTHIGAGW
chr5	245325289	-1		chr5_245325289_-1	CYP714C17_5D_Triticum_aestivum(wheat)	100	58	PKGTNIRVSIMLAHRDPSAWGADCDKFDPGRFAGGIARACKPHHMYMPFGVGPRTCAG
chr5	245432347	-1		chr5_245432347_-1	CYP714C21_5D_Triticum_aestivum(wheat)	100	60	LTMVIQETLRLYPPASLMMREALTDIKIGDLDVPRGTIVQVTRSMLHLDKEVWGPDAEEF
chr5	260484367	-1	1 aa diff to CYP74E7_6D	chr5_260484367_-1	CYP74E8_Beckmannia_syzigachne	75.61	41	VRRDYADLTAYFAEAAAGVLNDADKAQSGISCDELLHNLVF
chr5	287788816	-1		chr5_287788816_-1	CYP76L8_5D_Triticum_aestivum(wheat)	100	60	AIMRDPATWTQPEEFMPERFIGADMDFRGKDRFEFMPFGAGRRACPGMPMATRVVTLILA
chr5	287929662	-1		chr5_287929662_-1	CYP76L7_5D_Triticum_aestivum(wheat)	100	60	VVPKGTTVIVNLWAIMRDPAVWTQPEEFMPERFVRADMDFRGKDRFEFMPFGVGRRACPG
chr5	327436653	-1		chr5_327436653_-1	CYP735A4_Oryza_sativa	91.53	59	QLQMIIHETLRLYPPATLLPRMAFEDIRLGDLHLPRGLSVWIPVLAIHHDESIWGADAHE
chr5	332923276	-1		chr5_332923276_-1	CYP92A154_5D_Triticum_aestivum(wheat)	100	60	HPVAPMLVPRLSREDTSINGYDIPAGTRVLVMVWSIGRDPELWEAPEEFMPERFLGSRLD
chr5	332945173	1		chr5_332945173_1	CYP92A154_5D_Triticum_aestivum(wheat)	98.33	60	HPVAPMLVPRLSREDTSINGYDIPAGTRVLVMVWSIGRDPELWEAPEEFMPERFFGSRLD
chr5	354568059	1		chr5_354568059_1	CYP76L6_5D_Triticum_aestivum(wheat)	100	60	METMRLHPPSPLLMPHEAMADGAEVGGFAVSKGTKLIVNLWAIMRDPALWKQPEEFIPER
chr5	354669780	-1		chr5_354669780_-1	CYP76K3_5D_Triticum_aestivum(wheat)	100	59	RVLINVWAIGRDPEVWAEPEVFMPERFLDREVDFRGRALEFIPFGSGRRACPGMPLAVT
chr5	378512291	1		chr5_378512291_1	CYP728B3	90.24	41	MRGGDGGSRWVQDRIDRYGPVSKLSLFGTPTVLLAGPAANKFLFFSSALSTRQPRSVQRILGENSILDLHGADHRRVRGALLEFLRPDMLKMYVGRIDAEVRRHVEENWAGRGTVTVLPLMKRLTFDIISALLFGLQRGAVRDALAGDFAHMMKGMWAIPANLPFTAFSRSLKASGRARRVLAGITREKKAGRRQPEHGKAPRSNDLITCLLGLTDSHGERLLSDEEIVDNAMVALIAGHDTSSILMTFMVRHLANDDATLAAMVQEHEEIAMNKAEGEALTWEDLTKMKFTWRVAQEILRIVPPIFGNFRRALEDVEFDGYLIPKGWQVFWTANVTHMDASIFHEPAKFDPSRFENQAASAAAPCSFVAFGGGPRICPGIEFSRIETLVTMHHLVRHF…
chr5	383348547	-1		chr5_383348547_-1	CYP71BU13_5A_Triticum_aestivum(wheat)	93.33	60	ETMRLHPPGPLLVPRESMQHAKVHVYDVPRGTRIIVNAWAVGRDPTVWDNAGEFRPERFI
chr5	386127944	-1		chr5_386127944_-1	CYP71DK2_5B_Triticum_aestivum(wheat)	90.57	53	LVVKETLRLHMPAPLLIPRVCKEQCRLGGYTIPAGSRVVINAWAMSRDQRYWE
chr5	386585460	-1		chr5_386585460_-1	CYP79A147_5A_Triticum_aestivum(wheat)	100	60	YLKACIREAFRLHPYHPLNPPRVAMADTTVAGYSVPRGSQVVLSRVALGRNPRVWADPLE
chr5	399781340	-1		chr5_399781340_-1	CYP71E50_5D_Triticum_aestivum(wheat)	100	58	VVKETLRLHPPVTLLLPRETLRRVEIGGYDVPAGTRVLVNAWAIGRDPASWGQDAAEF
chr5	399901387	-1		chr5_399901387_-1	CYP71E53_5D_Triticum_aestivum(wheat)	98.33	60	TLRLHPPITLLLPRETLRRVEIGGYDVPAGSRVLVNAWAIGRDPASWGQDAEVFEPERFE
chr5	415805376	-1		chr5_415805376_-1	CYP71K45_5A_Triticum_aestivum(wheat)	100	60	YLRLVIKETLRLHPPVPLLLPRECEKPCQVLGFDVPRGAMVIVNAWAIGRDPAHWDNPGV
chr5	421739132	-1		chr5_421739132_-1	CYP78A264_5D_Triticum_aestivum(wheat)	100	60	VIKETLRVHPPGPLLSWARLATSDIHVDGFLIPAGTTAMVNMWAITHDPDVWAEPDEFRP
chr5	422702986	1		chr5_422702986_1	CYP71AK15_5D_Triticum_aestivum(wheat)	100	60	SRMEYLRAVLKEVLRLHPAAPLLIPHQSTTAAVVQGYEIPAETALFVNAWAIGRDPAAWG
chr5	422723185	1		chr5_422723185_1	CYP71AK13_5D_Triticum_aestivum(wheat)	100	60	EYLKAVLKEVLRLHPAAPLLVPHQSTTTAVVQGYEIPAETALFVNAWAIGRDPAAWGATA
chr5	423146199	1		chr5_423146199_1	CYP71AK14_5D_Triticum_aestivum(wheat)	100	60	HESTAAAVVQGYEIPAKTALFINDWAIARDPAAWGDAAEEFRPERFLDGASATDVDVRGN
chr5	423173769	1		chr5_423173769_1	CYP71AK17_5D_Triticum_aestivum(wheat)	100	60	EVLRLHPPAPLLIPHESTTTSIVQGYEIPAKTTLFINAWAIGRDPVAWGEGAEEFWPERF
chr5	431077469	-1		chr5_431077469_-1	CYP96B11 Brachypodium distachyon	64	56	IISRKPSIAGATMTMLDLDDVKTLVYLQATLLETLRLYPPIPIERKSVVTADVMP
chr5	431118548	-1		chr5_431118548_-1	CYP96B16	77.97	59	EEVRPLVYLQATLLETLRLYPPIPIERRSVVSTDVMPSGHPVCAQDIILVSIYSVGRMES
chr5	435508095	-1		chr5_435508095_-1	CYP709J13_5D_Triticum_aestivum(wheat)	100	59	QLNMFLLETLRLYSPLPFLLRKTASDTTLANIKFRKGTMITIPVMMLHRSKEIWGLDADE
chr5	435515975	-1		chr5_435515975_-1	CYP709J10_5B_Triticum_aestivum(wheat)	96.61	59	QLSMFLLETLRLYSPVPFLLRKTASDTTLTNIKFRKGTMITIPVMMLHRSKEIWGLDADE
chr5	448850090	-1		chr5_448850090_-1	CYP71F47_5D_Triticum_aestivum(wheat)	100	60	PPGPLVHRMSREDCTIMGYDIPKGTDVYINIFAISRDPRHWNKPEEFRPERFDNNNVNYK
chr5	452407630	-1		chr5_452407630_-1	CYP96B7_Oryza_sativa	83.02	53	LVYLRATLYETLRLYPPAHMERKTVVADDTMPSGHEVYAGDAIYISLYSMGRM
chr5	452437885	-1		chr5_452437885_-1	CYP96B7_Oryza_sativa	83.02	53	TLYETLRLYPPAHMERKTVVTDDIMPSGHEVQAGDAIFISLYSMGRMESLWGK
chr5	467008124	1		chr5_467008124_1	CYP71V31_5D_Triticum_aestivum(wheat)	100	59	INAWAIGRDPRYWEAAEEFRPERFEDGAVDFTGSSYEFLPFGAGRRMCPGFNYGLASME
chr5	476159712	1		chr5_476159712_1	CYP71AK16_5D_Triticum_aestivum(wheat)	100	60	PLLLPHESTTAAVVQGYEVPAKTALFINAWAIGRDPAAWGDEAEEFRPERFLGGGSTTGV
chr5	480893709	-1		chr5_480893709_-1	CYP81A54_5A_Triticum_aestivum(wheat)	92.73	55	SADCTVAGYHVPSGTTLLVNAYAIHRDPAAWEHPTEFRPERFEEGKAEGLFMMPF
chr5	480941480	1		chr5_480941480_1	CYP81A53_5D_Triticum_aestivum(wheat)	98.18	55	VPSGTMLIVNAYAIHRDPAVWEDPTAFRPERFEDGKGDGLLMPFGMGRRRCPGE
chr5	480990260	1		chr5_480990260_1	CYP81A52_5A_Triticum_aestivum(wheat)	100	59	DVPRLAYLQCIVSETLRLYPAAPMLLPHQSSADCKVGGYNVPSGTMLMVNAYAIHRDPA
chr5	481083047	1		chr5_481083047_1	CYP81A52_5D_Triticum_aestivum(wheat)	100	55	SADCKVGGYNVPSGTMLMVNAYAIHRDPAAWERPLEFVPERFEDGKAEGRFMIPF
chr5	481876861	1		chr5_481876861_1	CYP94E12_5D_Triticum_aestivum(wheat)	100	53	VESEDGYDELKGMHYLHAAITETMRLYPPVPMVSRVAVHDDVLPDGTVVRAGW
chr5	484643964	-1	CYP74	chr5_484643964_-1	CYP74A99_5B_Triticum_aestivum(wheat)	100	60	YGRAKRDMVVESHDYGYEVREGELLFGYQPMATKDPRVFPRAEDYVPDRFLGEDGERLLR
chr5	487160508	1		chr5_487160508_1	CYP71Y29_7B_Triticum_aestivum(wheat)	87.27	55	LQLHTPPLLLPRECREEPACRVLGYDVPKGTQVLVNAWALGRDERYWPDKPEEF
chr5	487170524	-1		chr5_487170524_-1	CYP71AA16_7D_Triticum_aestivum(wheat)	98.11	53	MVIKETFRLHPPVPLLLPRLCTEQKKIMGYDVPPGTTVFANVWAIGRDEKSWT
chr5	487249523	-1		chr5_487249523_-1	CYP71Y29_7D_Triticum_aestivum(wheat)	78.33	60	CRVLGYDVPKGT*VLVNAWALGRDERYWRDKPEEFRPERFEAAGDGAAVEVDFKGVDFEF
chr5	500342160	1		chr5_500342160_1	CYP71W29_5A_Triticum_aestivum(wheat)	91.67	60	YLHLVIKETPRLHTLVPFLLPWQCREACEVMGYHVPEGTRVLVNAWAMARDGAYWEDAEV
chr5	517509595	1		chr5_517509595_1	CYP72A594_5D_Triticum_aestivum(wheat)	100	59	QVTMVLYEVLRLYTPLTALQRKTCKPMDLGGVRYPAGVVLMLPLLCVHHDKEVWGADADE
chr5	522895949	1		chr5_522895949_1	CYP71F57_Beckmannia_syzigachne	74.58	59	EILGYAIPKGTKVHINVFTISRDSRYWEDPEAFKPERFENNDIDYKGTHFDFIPFGAGR
chr5	524379338	1	100% to CYP74E7_6D	chr5_524379338_1	CYP74E8_Beckmannia_syzigachne	78.05	41	VRRDYADLTAYFAEAAAGVLNDADKAQSGISRDELLHNLVF
chr5	531467721	1		chr5_531467721_1	CYP71C162_5D_Triticum_aestivum(wheat)	100	60	PYLKAVVKETLRLHPPAPLLLPRLTMAECDDVNGYMVPAGTRTIVNTWALCRDTESWGEK
chr5	533397122	-1		chr5_533397122_-1	CYP71F53_U_Triticum_aestivum(wheat)	100	60	VLRLHPPGALLPRKTREDCKIMGYDMLKDTNIYINVFAISRDPRYWNNPEEFNPGRFENN
chr5	534057887	-1		chr5_534057887_-1	CYP71C164_5D_Triticum_aestivum(wheat)	100	60	LRLYPIAPLLAPHLAMDDCNIDGYMVPAGTRVMVNAWAIARDSSLWEDAEEFIPERFTDE
chr5	538436388	1	83% to CYP711A70_7A	chr5_538436388_1	CYP711A70_7D_Triticum_aestivum(wheat)	85	60	VADSELCKEVRV*QFKNVPNRSLPSPIAGSDLHQKGLFFTQDERWSAVRNNIISLYQSPH
chr5	538476551	1		chr5_538476551_1	CYP711A70_7A_Triticum_aestivum(wheat)	86.67	60	FLSALLNARDGGDNKMRALLMSEYVGALTYEHLLAGSATTSFTLASVVYLVAGHPEVEAE
chr5	540105212	1	CYP709C46_5Db	chr5_540105212_1	CYP709C46_5Db_Triticum_aestivum(wheat)	100	60	NKLKLVNMFLLETLRLYSPLSTIQRKAGSDLEVGGITVPKGTVLTIPIATIHRDKEVWGE
chr5	547556081	-1		chr5_547556081_-1	CYP71F45_5D_Triticum_aestivum(wheat)	100	60	VLRLHPPATLLVPREARNNCEIMGYDIPKGAKINVNAFAISRDPRYWENPETFKPERFSN
chr5	549287460	1		chr5_549287460_1	CYP71T47_5D_Triticum_aestivum(wheat)	100	60	PYLKAVINETLRLHPPSPLLLPRETLEDTRLLGYDVPAGTRVLINAWAIGRDPATWGPRA
chr5	549860707	1		chr5_549860707_1	Oryza_brachyantha_Oryzbrac006267375.1.28679	71.19	59	HMGIRAAHDGDDTQHLWWSDLSSMPYTTKVMNETLRRATILPWYSRKAAQDFSIDGFEV
chr5	549861087	1		chr5_549861087_1	CYP733A1_Zea_mays	94.29	35	PYSFLGFGSGPRMCPGMSLAKLEICVFAHHLVCTY
chr5	559956807	-1		chr5_559956807_-1	CYP79A148_5B_Triticum_aestivum(wheat)	94.92	59	YAKACIREAFRLHPVAPFNVPHVALADTNVAGYHIPKGSHVILSRTGLGRNPTIWDEPLR
chr5	560020104	1		chr5_560020104_1	CYP71E51_5B_Triticum_aestivum(wheat)	98.33	60	EVPAGTRVLVNAWAIGREEASWGPDAEEFEPERFEAGGRHGKVDFRGAHMELVPFGAGRR
chr5	573970586	1		chr5_573970586_1	CYP71F52_U_Triticum_aestivum(wheat)	85	60	PVPLLIPRETREDCKIMGYDMPKGTNIFVNVFAISRDPKYWDNPEEFKPERFQNNKVDYY
chr5	574061678	1		chr5_574061678_1	CYP99A42_5D_Triticum_aestivum(wheat)	100	60	MRLNPVVPLLLPRVCRETCDVGGFEVTKGTRVMVNTWALGRNPEHWHEPEEFRPERFKNG
chr5	575121641	-1		chr5_575121641_-1	CYP71E48_5B_Triticum_aestivum(wheat)	95	60	VVKETLRLHPPAPLLVPRETMRHIQIGGYDVPAKTRIYVNAWAIGRDPASWPDNPEEFNP
chr6	3042899	1		chr6_3042899_1	CYP75A81_6D_Triticum_aestivum(wheat)	100	52	PYLQAICKEAMRLHPSTPLSLPHFSFEECEVDGHHVPANTRLIINIWAIGRD
chr6	5593629	1		chr6_5593629_1	CYP709H4_6D_Triticum_aestivum(wheat)	98	57	LMQLHMVLLETSRLYPPVVYIQRRAAADAVLGGITVPQGTIISIPIGMLHRDKEVWGPDA
chr6	5642232	1		chr6_5642232_1	CYP75B123_6D_Triticum_aestivum(wheat)	100	60	FRPARFLPGGSHADVDVKGGDFGLIPFGAGRRICAGLSWGIRMVAVTTATLVHSFDWELP
chr6	5649856	1		chr6_5649856_1	CYP75B124-fragment_6d_Triticum_aestivum(wheat)	100	53	VIKDTFRLHPSTPLLLLRMATEECETAGYRIPKGTELLVNVWGIAHDPALWPD
chr6	9143174	-1		chr6_9143174_-1	CYP71C167_6D_Triticum_aestivum(wheat)	96.67	60	YLKGVIKETLRLHSPVPLFLPHLSMADCDIEGYTIPSGTRVIINGWALARDPAYWESAEE
chr6	9209102	1		chr6_9209102_1	CYP71C167_6D_Triticum_aestivum(wheat)	100	60	MIYLKGVIKETLRLHSPVPLFVPHLSMADCDIEGYTIPSGTRVIINGWALARDPAYWESA
chr6	12390673	1	CYP74	chr6_12390673_1	CYP74F3	91.67	60	SHGGEGFSVAAGEMLCGYQPLAMRDPAVFDRPDEFVADRFVGAEGEALLRYVYWSNGPET
chr6	16021262	-1		chr6_16021262_-1	CYP76M-FRAGMENT_7D_Triticum_aestivum(wheat)	86.67	60	VEIGGYTVPKGATVIFNSWSIMRDPAAWERPEEFVPERFLGKTELGMWGKEVKFIPLGTG
chr6	25899993	-1		chr6_25899993_-1	CYP71X44_6B_Triticum_aestivum(wheat)	87.1	31	KPVIKETMRLHLGAPLLLPREAREPCKILGYHGVGE
chr6	28910080	1		chr6_28910080_1	CYP71C122v5_Saccharum_spontaneum	68.33	60	PYLKAVLKETLRLHPPLPLLLPHFSMDRCIINGCTVPAETRVIINVWAIGRDPGSWEDAE
chr6	32884888	1		chr6_32884888_1	CYP76M31_U_Triticum_aestivum(wheat)	100	60	VKEVMRLHPVAPLMLPHQAAEDGVEIGGYAVPRGATVIFNVWAIMRDPAAWERPDEFVPE
chr6	33062797	1		chr6_33062797_1	CYP76M31_6B_Triticum_aestivum(wheat)	95	60	ATVVFNVWAIMRDPAAWERPDEFVPERFLDKAAAVEFRGKDYEFIPFGSGRRLCPGLPMA
chr6	37517889	1		chr6_37517889_1	CYP92A96_orthologv1_Saccharum_spontaneum	85.19	54	EFRPERFMGSKIDVKGQDMELLPFGAGRRMCPGYSLGLKVVQLIVANLLHGFTW
chr6	54306231	-1		chr6_54306231_-1	CYP723F1v1_partial_Saccharum_spontaneum	65.12	43	YPSEDEEREILHRGMAPYLHAVVLESLRMHPPAPFVVRDVRAEGGVVGQTAMPAGGLRVH
chr6	57364890	-1		chr6_57364890_-1	CYP79A151_U_Triticum_aestivum(wheat)	98.33	60	YLKACIREAFRLHPVAPFNVPHVAIADTIVAGYRVPKGSHVILSRLALGQNPTVWDEPLH
chr6	68376634	1		chr6_68376634_1	CYP71W32_6D_Triticum_aestivum(wheat)	100	60	PVPFLLPRQCRERCEVMGYEVPDGTKVLVNAWALGRDGAYWEDAERFKPERFEAESAAMD
chr6	70530450	1		chr6_70530450_1	CYP89J18_6D_Triticum_aestivum(wheat)	98.33	60	DVVLDGRRIGVGTTVIFPLETLARDKTVWADPDVFKPERFLASGGGETMNLVAAAGSARK
chr6	75111225	-1		chr6_75111225_-1	CYP71P10_6A_Triticum_aestivum(wheat)	100	60	KETFRLHPAVPLLVPRETVAACTLGGYDIPAKTRVFINTFAMGRDPEIWEDPLEYSPERF
chr6	81202787	-1		chr6_81202787_-1	CYP81N21_6D_Triticum_aestivum(wheat)	92.98	57	LRLCPVGPLIPAHEAMEDCTVGGYRVRRGTMILVNTWAINRDADAWDSPGEFRPERF
chr6	92041402	1		chr6_92041402_1	CYP71V33_6D_Triticum_aestivum(wheat)	100	59	ACELGGYVVPAGSRVVVNAWAIGRDPRYWGDDAEEFKPERFADSSVDFNGSSYEFLPFG
chr6	102056389	1		chr6_102056389_1	CYP81N21_6B_Triticum_aestivum(wheat)	96.67	60	LRLCPVGPLIPAHEAMEDCTVGGFRVRRGTMILVNSWAINRDADLWDSPTEFMPERFLDT
chr6	108808607	1		chr6_108808607_1	CYP71C166_6D_Triticum_aestivum(wheat)	98.33	60	YLKAVVKETLRLHPPAPLLLPHLSMAECDIDGYKVPVEARVIVNAWALGRDPGSWEAADE
chr6	109630182	-1		chr6_109630182_-1	CYP71C170_6D_Triticum_aestivum(wheat)	98.33	60	YLKAVVKETLRLHPPAPLLLPHLSMAECDIGGYKVPAETRVIVNAWALGRDPGSWEAADE
chr6	121228012	-1	100% to CYP71AF11_6D	chr6_121228012_-1	CYP71AF11_6D_Triticum_aestivum(wheat)	100	52	EVLPELRYLHLVIKETLRLHPAVPLLLPRECTEPQSMLGHDVPKGAMVLVNA
chr6	124261758	-1		chr6_124261758_-1	CYP71X40_6D_Triticum_aestivum(wheat)	98.33	60	TLRLHPPAPLLIPREAMESCKILGYDVPKGTTVLVNAWAIGRDPKHWDNPEEFKPERFES
chr6	124488585	1		chr6_124488585_1	CYP71X16_Oryza_sativa	81.36	59	DPKYWADPEEFKPERFESGTLDFKGTHFEFIPFGAGRRMCPGVAFAQANIELALASLLY
chr6	124916480	1		chr6_124916480_1	CYP71X44_6B_Triticum_aestivum(wheat)	100	60	TMRLHPAAPLLLPREAREPCKILGYDVPKGTTVLVNAWAIGRDPKHWEDPEEFKPERFES
chr6	124927717	1		chr6_124927717_1	CYP71X41_6D_Triticum_aestivum(wheat)	100	60	ETMRLHPAAPLLLPREAMEPCKILGYDIPKGTTVLVNAWAIGRDPKHWEDPEEFKPERFK
chr6	140787011	-1	100% to CYP97B4_6D	chr6_140787011_-1	CYP97B58_Beckmannia_syzigachne	100	71	IIADFAFLPFGGGPRKCVGDQFALLESTVALALLLQKFDVELRGSPDEVEMVTGATIHTKNGLWCRLRKRT*
chr6	167348843	-1		chr6_167348843_-1	CYP71K47_6D_Triticum_aestivum(wheat)	100	60	LRLHVPGPLLTLRQCRSPCQVLGYDVPAGATVFVNSWAIARDPAHWDAPEEFLPERFDQE
chr6	167452835	-1		chr6_167452835_-1	CYP71K46_6D_Triticum_aestivum(wheat)	100	59	VIKETLRMHPPAPLLLPRRCGSPCQVLGLDVPEGVMVIVNAWAIGMDPAYWDAPEEFAP
chr6	168064187	-1	100% to CYP71X43_U	chr6_168064187_-1	CYP71X43_U_Triticum_aestivum(wheat)	100	44	GYDVPKGFVVFVNAWAIGRDPKFWDDPEEFKPERFENSTVDLKG
chr6	168456515	-1		chr6_168456515_-1	CYP71X33_6D_Triticum_aestivum(wheat)	100	60	TLRLHTVLPLLLPRECRETCNVMGYDVPKGTTVFVNAWAISRDPKHWDDPEKFKPERFES
chr6	173621713	1		chr6_173621713_1	CYP734A27	94.83	58	RQLGMIINETLRLYPPAVATIRRAKADVRLSDGCMIPRDMELLIPIMAIHHDARYWGQDA
chr6	181919802	-1		chr6_181919802_-1	CYP89E5	86.67	60	GGHAVPKGAEVNFLVADFGRDEAAWTAAKEFRPERFLDGGEGYGVDLTGSREIKMMPFGA
chr6	183267447	1	100% to CYP74E7_6D	chr6_183267447_1	CYP74E8_Beckmannia_syzigachne	83.47	490	MTSKVANSSGSNNADAKLSPSGLPVREVPGGYGVPFLSPLRDRLDYYYFQGAEEYFRSRIARNGGATVLRVNMPPGPFITTDSRVVAFLDARSFSVLLDDAKVDKTDTLDGTFMPSLALFGGYRPLAFLDAADPHHAALKRVMISLAAARMHHVAPAFRTAFGAVFDAADAGLGDGPVQFNKLNEHHMFDFTCSALFGGTPPSKAMGDGAVTKAIKWLGVQLHPLASKIIKPWLLEDLLLHTFRLPPLLVRRDYADLTAYFAEAAAGVLNDADKAQSGISRDELLHNLVFTAIFNAYGGFKIFLPHVIKWLARAGPALHARLASEVRAAVPNGSDITVPAVDKMPLVKSVVWEALRMNPPVEFQYGRARQDLVVESHDAAYRVRKGEMLFGYQPLATRD…
chr6	187630501	-1	100% to CYP711A67_6D	chr5_187630501_-1	CYP711A67_6D_Triticum_aestivum(wheat)	100	544	MEATNCSIALETADHAAAHGTSAPALLLLSSVAVIGAFLVYFYAPFWALRRVPGPPARFPLGHLHLLANHGPDVFRAIAKEHGPIFRFHMGRQPLVIVANAELCKEVGIKKFKDIRNRSTPPPTVGSLHQDALFLTRDSTWSSMRNTVVPLYQPARLAGLVPTMQPYVDALVDSVAACPDQDCVPFCQLSLRMAIDIIGRTAFGIDFGLCKKVAAADGGEDVRGFLEEYKRSMEFIKMDLSSSLSTILGLFLPCVQTPCKRLLRRVPGTADYKMEENERLLCRRIDAIIAGRRRDRENSASPPGAALDFIAALLDAREGGARDLALEDRHVRALAYEHLIAGTKTTAFTVSSVVYLVSCHPRVEGKLLAEVDAFGGAAPDADDLQGRFPYLDLVIKEAM…
chr6	291221536	-1		chr6_291221536_-1	CYP86E3_6D_Triticum_aestivum(wheat)	100	56	DVLPDGTAIRARQRVIYNTYAIGRDPAAWGEDCLEFRPERWMKGGDFAGGAESPFK
chr6	341146900	1	CYP86A5	chr6_341146900_1	CYP86A5_6D_Triticum_aestivum(wheat)	100	60	GVWGEDCLEFRPERWLSADGTKFEQHDSYKFVAFNAGPRVCLGKDLAYLQMKNIAGSVLL
chr6	362925335	-1	100% to CYP74E7_6D	chr6_362925335_-1	CYP74E8_Beckmannia_syzigachne	78.05	41	VRRDYADLTAYFAEAAAGVLNDADKAQSGISRDELLHNLVF
chr6	405217236	-1		chr6_405217236_-1	CYP72A595_6B_Triticum_aestivum(wheat)	100	60	VTMILHEVLRLYPSATVFSRKTYKDMDIGGVRYPSGVFIEVPVLFINHDPDIWGSDVNEF
chr6	420773184	1		chr6_420773184_1	CYP81L12_6B_Triticum_aestivum(wheat)	94.12	34	GFYIPQGTMLLVNAFAIHRDPQLWHEPASFVPER
chr6	435421339	-1		chr6_435421339_-1	CYP71AM10_6D_Triticum_aestivum(wheat)	100	60	TLRLHPPAPFFPRLCLQDYKIQGYDVPQGVILLTNIWAISRDPKYWDEPEKFMPERFEGV
chr6	435580543	-1		chr6_435580543_-1	CYP71AM12_6D_Triticum_aestivum(wheat)	82.98	47	QGYDIPRGATMLTKTWAISRDPKYWYETKRFMPERFEGNGVADFRGL
chr6	436038620	1		chr6_436038620_1	CYP71AM12_6D_Triticum_aestivum(wheat)	100	60	KETLRLHPPASLFPRVCVQDCKIQGYDVPRGATMLTNTWAISRDPKYWNEPEKFMPERFE
chr6	471105482	-1		chr6_471105482_-1	CYP75A87_6D_Triticum_aestivum(wheat)	98.31	59	DRLLQESDIPHLPYLRAICKETFRLHPSTPLSLPRLSTEPCTVQGYHIPEGTRLLVNIW
chr6	471247538	1		chr6_471247538_1	CYP75A87_6D_Triticum_aestivum(wheat)	95	60	LPYLRAICKETFRLHPSTPLSLPRLSTEPCTVQGYLIPEGTRLLVNICAIGRDPAVWAEP
chr6	475482541	-1		chr6_475482541_-1	CYP72A597_6B_Triticum_aestivum(wheat)	100	60	VTMILYEVLRLYPPAVAFMRKTYKEIEIGSITYPAGVIIELPVLLIHHDPDIWGSDVHEF
chr6	476753009	-1		chr6_476753009_-1	CYP728B3	91.67	60	DASIFHEPARFDPSRFENQAASAAPPCSFVAFRGGPRICPGIEFSRIETLVTMHHLVRQF
chr6	476758763	1		chr6_476758763_1	CYP728B3	93.33	60	DASIFHEPARFDPSRFENQAASAAPPCSFVAFGGGPRICPGIEFSRIETLVTMHHLVRQF
chr6	484041002	1		chr6_484041002_1	CYP97A62_Beckmannia_syzigachne	90.91	55	QAVYVTLREAEMRSTAPIPTWKIPIWKDVSPRQRKVNEALVLINNILDELISTCK
chr6	485701168	-1		chr6_485701168_-1	CYP89C10_6D_Triticum_aestivum(wheat)	100	60	PYLRAVVLESLRRHPPARFILPHAAAGENGTVLDGFTVPKEVSVNFTLGDMAMDRKVWPD
chr6	486194192	-1		chr6_486194192_-1	CYP715B1_orthologv3_Saccharum_spontaneum	80.65	62	EVLRLYPPSPNVQRQALHDVAVDGAGTTIPRGTNMWVDVVAMHHDEALWGPDANEFRPER
chr7	3081364	1	CYP51	chr7_3081364_1	CYP51G3_2B_Triticum_aestivum(wheat)	90	60	MELPRVLWPAFVAIFVTVVSIMMARRRTMFSQKTKRSPPSPPVAAGVPLLGVLPALLAKGPLHVIRDAHTEMGSVFTVRLLHRKVTFLVGSEVSSHFYQGLESEISQDEVSQFTTPTFGPGVAFDVDFTTRREQFRFFGDAMKPAKLREVEEYFARWGQSGTVDLKQELEQLVTLVASRCLFGEEVRAKMLVEVATHLRELNDGMRLVTILFPHLPIPAHRRRDRARARLGEIFSNIVSARKASYPNSSRHVVDDMLQCLVDSRYKDGRATTETEVVGMLVSALFAGQHTSSSTGTWTGARLLARANAKQLCAAVQEQERILARHGNRLDYEVLQEMDTLHRCVKEVLRLHPPAMMLLRHARQSFTVRTSEGDEYEVPEGRTVASPLVIHNRLPHVFRD…
chr7	5091670	1		chr7_5091670_1	CYP96B26_Sorghum_bicolor	77.36	53	IYLHAALFESMRLYPPGPIERKTVMTDDVLPSGHKVQRGETILISLYSMGRME
chr7	8050533	-1		chr7_8050533_-1	CYP76H2	100	60	TFRLHPPAPFLLPHVAETTTQVQGYTIPKGTRLLVNVWAIGHDGKVWPEPEKFMPERFLE
chr7	9220316	-1		chr7_9220316_-1	CYP71E59_7D_Triticum_aestivum(wheat)	80.7	57	ETLCLHPALPLLLPRETGRHITVSGTVSGYDVPEKTRILVNAWAIGREPVNWDNPEE
chr7	9719126	-1		chr7_9719126_-1	CYP96B26_Sorghum_bicolor	73.58	53	KDLVYQRAAMFESLRLYPIAPMERKEVLADDLLPSGHKVRAGSTILISTYSMG
chr7	12460931	1		chr7_12460931_1	CYP92A152_3D_Triticum_aestivum(wheat)	91.67	60	PYIEAVVKESMRMHPIVPLLIPRMAQEDATIDGYNIPKGARVLINVWAIGRDPELWDAPE
chr7	12507853	-1		chr7_12507853_-1	CYP92A157_7D_Triticum_aestivum(wheat)	100	59	DGYDIPKGARVLINVWAIGRDPELWDAPEEFKPERFLGSKMGVIGQDLELLPFGSGRRM
chr7	12523232	-1		chr7_12523232_-1	CYP92A156_7D_Triticum_aestivum(wheat)	91.23	57	VRVWSIGRHPELWDAPEEFRPERFIGSKIDVKGQDLELLPFGSGRRMCPGYNLGLKE
chr7	12525666	-1		chr7_12525666_-1	CYP92A156_7D_Triticum_aestivum(wheat)	100	53	ETMRMHPIVPLLIPRVAREDAAVGGYDVPKGARVLINVWAMGRDPELWDAPEE
chr7	13325627	-1		chr7_13325627_-1	CYP96B26_Sorghum_bicolor	81.67	60	EETKPLVYLQAALFESMRLYPPGPIERKTVMADDVLPSGHRVQRGETILIALYSMGRMEG
chr7	13589989	-1		chr7_13589989_-1	CYP96B26_Sorghum_bicolor	81.67	60	EETKPLVYLQAALFESMRLYPPGPIERKTVMADDVLPSGHRVQRGETILIALYSMGRMEG
chr7	13700702	-1		chr7_13700702_-1	CYP96B89_Alopecurus_aequalis	79.25	53	ALYETLRLYPPAPVERKTAAANDFMPSGHEVHAGDTIFICLHSMGRMETLWGK
chr7	16652574	1		chr7_16652574_1	CYP71X44_6B_Triticum_aestivum(wheat)	98.33	60	TMRLHPAAPLLLPREAREPCKILGYDVPKGTTVLVNAWAIGRDPKHWEDAEEFKPERFES
chr7	17725001	-1	86% to CYP709C50_2D	chr7_17725001_-1	CYP709C46_5B_Triticum_aestivum(wheat)	80.65	496	MDVAWVAPAAVAAVLASWASSELVWRPRAITRELGAQGVGGPGYKFLAGNLGEIKQLRAASADAVLAIGSHDLVPIVQPHLHKWIPLHGRTFLYWFGARPTLCVADVNMVQQVLSDRNGLYPKNTVIPHIARLLGNGLVLTNGDEWKRHRKVVHPAFDMDKLKMMTETISDSAGSIMSEWKAKADKGEGEAEIELSSQFEELTADVISRTAFGGSHKEGKQVCLAQRDLQFLAFSAVYNVVYDQILSRYLPTEKNLKIRKLDKEVRGILADIIKSRLTTNDTKSYGCDLLGLMLEACMPQEHGHDPLLSMDEIIDECKTFFFAGHDTSSHMLTWTTFLLSIHPEWQQKLREEVMRECGSAVPTADMLNKLKLLNMFLLETLRLYNPVSVIQRKAGSDLE…
chr7	18370887	-1		chr7_18370887_-1	CYP75A86_6B_Triticum_aestivum(wheat)	100	52	ICKEAMRLHPSTPLSLPHFSFEECEVDGHHVPANTRLLINIWAIGRDPAAWE
chr7	18416387	1		chr7_18416387_1	CYP75A86_6B_Triticum_aestivum(wheat)	98.08	52	NLPYLQAICKEAMRLHPSTPLSLPHFSFKECEVDGHHVPANTRLLINIWAIG
chr7	19161630	-1		chr7_19161630_-1	CYP71E60_7D_Triticum_aestivum(wheat)	100	60	ETLRLHPPATLLVPRETTGRIQVAGYDIPAKTKIIVNAWAIGRDPSAWNDDPEEFRPERF
chr7	19283403	1		chr7_19283403_1	CYP76P10	84.62	52	TLRLHAVVPLAPNKVEQTVEIQGYTIPKGSTVIVNLWAIHHNAQVWTEPDKF
chr7	29523198	-1		chr7_29523198_1-	CYP96E1_ortholog_Beckmannia_syzigachne	88.46	52	YLHAALSESLRLYPPVPFEHKAAAQPDTLPSGPAVSRTRQLIVSFYSMGRMEA
chr7	29557614	-1		chr7_29557614_-1	CYP96E1v3_Saccharum_spontaneum	88.33	60	RMEAVWGKDCLEFRPERWLTETGRLRHEPSYKFVAFNVGPRTCIGKDLAFTQMKAVVAAV
chr7	31811345	-1		chr7_31811345_-1	CYP704A163_U_Triticum_aestivum(wheat)	86.96	46	LDRNIVSRMALPWLRKTLAILQDGKMADEDDLLPNGYRVIKGDGMNYMIYAMGRMKYLW
chr7	31820905	-1		chr7_31820905_-1	CYP704A168_7D_Triticum_aestivum(wheat)	100	50	DGKMADEDDVLPNGQRVIKGDGMNYMIYAMGRMKYLWGEDAEEFRPERWL
chr7	41788630	1		chr7_41788630_1	CYP76H46_7D_Triticum_aestivum(wheat)	98.33	60	LHPPAPLLLPRQAQTTIRITGYTIPKGARVMVNVWAMGRDEAIWSEPEKFMPERFLGRAV
chr7	46291386	-1		chr7_46291386_-1	CYP71E12	100	60	RMVVKETLRLHPPGPLLLPRETMRHIQIGGYDVPAKTKIYVNAWAIGRDPVSWPDDPEEF
chr7	46312206	1		chr7_46312206_1	CYP71E57_7D_Triticum_aestivum(wheat)	100	60	VKETLRLHPAAPLLLPRETMRDIKIGGYDVPAKTRIYVNAWAIGRDPISWSNDPDEFNPD
chr7	56728902	-1		chr7_56728902_-1	CYP76M30_4A_Triticum_aestivum(wheat)	95	60	VGPILLPHRAVEEGVEIGGYAVPEGSTVIFNAWAIMRDPAAWERPDEFVPDRFLGMADAD
chr7	56749519	1		chr7_56749519_1	CYP76M35_7D_Triticum_aestivum(wheat)	100	60	MRLHPVAPILLPHRAVEEGVEIGGYAVPEGSTVIFNAWAIMRDPAAWERPDEFVPERFLG
chr7	59226653	-1		chr7_59226653_-1	CYP729A2_Oryza_sativa	76.67	60	MKYTTKVVEETIRMANISSMVYRVANKDVEYHGYTIPKGWPVVVWLRSLHTDPNYYQDPL
chr7	59258559	-1		chr7_59258559_-1	CYP729A8	80	60	MKYTTKVVEETIRMANISTMVFRVANMDVEYHGYTIPKGWPVLVWLRSLHTDPNYYQDPL
chr7	59783812	1		chr7_59783812_1	CYP96B19	83.33	60	LPSGHEMKAGDKILIYYYSMGRMEGVWGKDCMEFRPERWLADDGKVRYEPSYKFMAFNAG
chr7	72511325	-1		chr7_72511325_-1	CYP71AB22_7D_Triticum_aestivum(wheat)	100	60	YLHCIIKETLRLHPPGPFLLPKQCQEQCKILGYDVPKGTTVLLNAWAISRDPEYWDEPDA
chr7	78629658	-1		chr7_78629658_-1	CYP72A470	75	60	RLMQVTMILYEVLWLYPSAITFIRKTCKDMKNGGITYAGGVLIELLVLFIHHDLEIWGSD
chr7	79017809	-1		chr7_79017809_-1	CYP72A256v1	78.57	56	RPMQVTMILYEVLWLYPPAITFIRKTCKDMKIGGIAYPAGVLIELPVLFIHHDLEIWGND
chr7	83645633	-1		chr7_83645633_-1	CYP76M-FRAGMENT_7D_Triticum_aestivum(wheat)	98.33	60	PYLQAAVKESMRLQPVAPLLLPHLVVEEGMEIGGYAVPKGAAIIFNSWSIMRDPATWERP
chr7	88245761	-1		chr7_88245761_-1	CYP71M1v1	96.49	57	DKPEEFYPERFDGVDTDFYGSHYELLPFAAGRRICPAIPMGSTIVEFTLASLLHSFD
chr7	88265732	-1		chr7_88265732_-1	CYP71M3_7D_Triticum_aestivum(wheat)	98.33	60	VVKETLRLHPPAPLLVPRETIDHVKVLGYDIPSKTRIFVNVWAMGRDPACWDRPEEFYPE
chr7	105332835	-1		chr7_105332835_-1	CYP709C47_7D_Triticum_aestivum(wheat)	98.33	60	AVIMIARETTADTELGGVKIPKGTTTMIPMAIMHRDEEVWGADAGEFKPDRFQNGVGRAA
chr7	105456860	-1		chr7_105456860_-1	CYP709C49_3B_Triticum_aestivum(wheat)	98.33	60	VLYETLRLYGAVIMIARQTMADTELGGVEIPKGTITMIPTAMMHRDEEVWGADAGEFKPD
chr7	106222824	1		chr7_106222824_1	CYP89J17_7B_Triticum_aestivum(wheat)	88.33	60	LDGHRVVAGTTVQFLLERLARDKTVWAEPDKFLPERFLAGGGGNGTSLVAAAGSAGEIKM
chr7	106244163	1		chr7_106244163_1	CYP89J17_7B_Triticum_aestivum(wheat)	86.44	59	YSLADKVMPDDHVFLDGRRVVAGTTVQFPLERLARDETAWAEPDKFMPERFLAGGGGSGV
chr7	163429805	-1		chr7_163429805_-1	CYP71E58_7D_Triticum_aestivum(wheat)	100	60	KETLRLYPPATLLLPRETMRHVRIGGYDVPAGTRVAVNAWALGRDPASWGEDADEFNPDR
chr7	178616615	1		chr7_178616615_1	CYP71U12_7D_Triticum_aestivum(wheat)	100	53	FRPERFEGVSVEYNSQGPHMEFIPFGAGRRQCPGALFATTMLELVLANLLYHF
chr7	259573519	-1		chr7_259573519_-1	CYP78A265_2D_Triticum_aestivum(wheat)	100	60	VVKEVLRLHPPGPLLSWARLATSDVHVDGLLVPAGTTVMVNMWAITHDPVVWDKPAEFKP
chr7	262512226	-1		chr7_262512226_-1	CYP706C60_Beckmannia_syzigachne	98.11	53	ETLRLHPALPLMVPHCPNEDTTVGGHRVPAGSRVFVNAWAIMRDPAAWKDPAK
chr7	265299451	1		chr7_265299451_1	CYP71F50_7D_Triticum_aestivum(wheat)	98.33	60	VLRLHPPIPLVPRMARDDCTIMGYDMLKGTNVLVNVFAISRDSRYWENPEEFKPERFENN
chr7	267654152	1		chr7_267654152_1	CYP89E25_7B_Triticum_aestivum(wheat)	100	60	EIAAYAVPKGAEVNFLVAEIGRDETVWTAAREFRPERFLEGGEGHGVDITGSREIKMMPF
chr7	378776116	1		chr7_378776116_1	CYP89C11_2A_Triticum_aestivum(wheat)	98.33	60	RVPAGTPVNFAVGDIGLDEEIWTAPSEFRPERFLPGGEGEDVDLTGSKEIKMMPFGAGRR
chr7	386923209	-1		chr7_386923209_-1	CYP703A-fragment1_Beckmannia_syzigachne	96.15	52	ESFRMHPAGPFLIPHESLKATTIMGYDIPAQTRIFINTHALGRNPRIWDDVD
chr7	410750298	-1		chr7_410750298_-1	CYP735A3	88.89	63	QLQMVINETLRLYPPATLLPRMAFEDITLGGELRVPRGASVWIPLLAIHHDEAVWGADAH
chr7	433843555	1		chr7_433843555_1	CYP89G6_7D_Triticum_aestivum(wheat)	100	60	PFLEAVVLEALRRHPPAHYLLAHTTDKDAHLDGYLIPKGSVVNYGVADIGRDATSWTNPD
chr7	448405075	-1		chr7_448405075_-1	CYP93G20_7D_Triticum_aestivum(wheat)	100	60	YLQAVLKETLRLRPPAVFAQREAIEPIHVRGYTIPVKTSVFFNIFSIGRDAAYWEEPLEF
chr7	450869198	-1		chr7_450869198_-1	CYP71Q10_7D_Triticum_aestivum(wheat)	100	60	VKENFRLHPPGTLLIPRETMQSCEIAGYSVPAGTRIHVNVWAMGRDPDIWDRPEEFFPER
chr7	451676799	-1		chr7_451676799_-1	CYP734A42_orthologv3_Saccharum_spontaneum	88.52	61	QLGMILNETLRLYPPAVATIRRAKVDVTLGDLAIPRDTELLIPIMAIHHDARFWGPDAAQ
chr7	452442212	1		chr7_452442212_1	CYP84A108_7D_Triticum_aestivum(wheat)	100	58	MPDGEATGLDLKGGCYELLSFGSGRRSCPAQGLGQHAVEFAIAQLVHGFNWKLPGDMK
chr7	466862420	1	100% to CYP711A70_7D	chr7_466862420_1	CYP711A70_7D_Triticum_aestivum(wheat)	100	516	MAEAGEWLPYVSTLAPCLLGFALYFYAPYWGVRGVPGPPALPIVGHLPLLALHGPDVFGALAKKYGPIFRFHLGRQPLVIVADPELCKEVGVRQFKSVPNRSLPSPIAGSDLHQKGLFFTRDERWSAMRNTIISLYQPSHLAGLIPTMQRCIERAADTIQLNGNVDIDFSDLALKLATDVIGQAAFGVDFALSAPREHGGREAEEFMAEHVHSTTSLKMDLSASLSIVLGLVAPALQGPARGLLRRLPGTADRRIARTNDRLRARVEEIVASRERDLDKRRGQRDFLSALLNARDSGGDKMRELLTPEYVGALTYEHLLAGSATTSFTLSSAVYLVSGHPEVEAKLLAEVDRSGAAPPTADDLQRNFPYLDRVIKEATRFYTVSPLIARETSRRVEVGG…
chr7	509041034	-1		chr7_509041034_-1	CYP73A202_7D_Triticum_aestivum(wheat)	100	60	VVVNAWWLANNPELWEKPEEFRPERFLGEESNVDTTVGGGKVDFRFLPFGVGRRSCPGII
chr7	512524927	1		chr7_512524927_1	CYP93F12_7D_Triticum_aestivum(wheat)	100	55	ERFLEGGANAGTDVRGQHFHMLPFGSGRRICPGASLAMLVVQAALAAMVQCFEWR
chr7	525229840	-1		chr7_525229840_-1	CYP79A151_U_Triticum_aestivum(wheat)	88.33	60	YLKACICEAFRRHPVASFNMPHVAIADTIVAGYRVPKGSHVILNRMALGQNPTVWDEPLH
chr7	512575649	1		chr7_512575649_1	CYP93F13_7D_Triticum_aestivum(wheat)	100	59	AKETLRLHPTGPLVVRRSLEQCKVSGYDVPAGATVFVNVWAIGRDPSCWPEPLEFRPER
chr7	525657908	1		chr7_525657908_1	CYP79A149_7D_Triticum_aestivum(wheat)	100	60	YLKACIREAFRLHPIAPFNLPHVAIADTIVAGYRVPKGSNVILSRLALGRNPTVWDEPLR
chr7	525711342	1		chr7_525711342_1	CYP79A149_7D_Triticum_aestivum(wheat)	100	60	YLKACIREAFRLHPIAPFNLPHVAIADTIVAGYRVPKGSNVILSRLALGRNPTVWDEPLR
chr7	523852586	-1		chr7_523852586_-1	CYP75B125_7A_Triticum_aestivum(wheat)	100	60	KETFRLHPSTPLSLPRMASEECEVAGYRIPKGTELLVNVWGIARDPALWPDPLEFRPARF
chr7	535901430	-1		chr7_535901430_1-	CYP76H34_2B_Triticum_aestivum(wheat)	83.33	60	PYLQVVIKETFRLHPPAPLLLP**PEMTVKIASYTIPKGSRMFINVWAIGRDKDVWTEPE
chr7	524951247	1		chr7_524951247_1	CYP79A151_7D_Triticum_aestivum(wheat)	100	60	YLKACIREAFRVHPVAPFNLPHVAIADTIVAGYRVPKGSHVILSRLALGRNPTVWDEPLH
chr7	535946228	1		chr7_535946228_1	CYP76H41_2B_Triticum_aestivum(wheat)	78.33	60	PYLQAVIKETLRLHPPAPPLLPRQAKVMVKIEGYTIPMGSRLFINIWAIGRDKDVWTEPE
chr7	535958509	1		chr7_535958509_1	CYP76H36_2D_Triticum_aestivum(wheat)	92.98	57	ATLKIAGYTIPKGSRIFINVWAIGRDKDVWDEPDKFMPERYLGSTVDFRGADFELLP
chr7	535973589	-1		chr7_535973589_-1	CYP76H47_7D_Triticum_aestivum(wheat)	98.33	60	YLQAVIKETFRLHPPAPLLLPRQPEMTVKIAGYTIPKGSRVFINVWARGRDKDVWTEPEK
chr7	536025336	-1		chr7_536025336_-1	CYP76H37_2A_Triticum_aestivum(wheat)	98.33	60	PYLQAVIKETF*LHPPAPLLLPRQPEMTVKIAGCTIPKGSRVFINVWAIGRDKDVWTEPE
chr7	536106301	-1		chr7_536106301_-1	CYP76H37_2A_Triticum_aestivum(wheat)	100	60	TFRLHPPAPLLLPRQPEMTVKIAGCTIPKGSRVFINVWAIGRDKDVWTEPEKFMPERFLG
chr7	559271383	1		chr7_559271383_1	CYP72A600_7D_Triticum_aestivum(wheat)	100	59	QVTMIFYEVLRLYPPITFLTRRTYKAMELGGIKYPAGVNLMLPILFIHHDPDIWGKDARE
chr7	559276281	1		chr7_559276281_1	CYP72A600_7B_Triticum_aestivum(wheat)	98	59	QVTMILYEVLRLYPPAIFLARRTYKAMELGGIRYPAGVNLMLPLIFIHHDPDIWGKDAKE
chr7	560291310	-1		chr7_560291310_-1	CYP72A599_7A_Triticum_aestivum(wheat)	100	59	QVTMILYEVLRLYPPVTYLTRRTYKATELGGIKYPTGVTLILPLLFIHHDPDIWGEDASE
chr7	563307261	1		chr7_563307261_1	CYP79A149_6A_Triticum_aestivum(wheat)	100	59	YLKACIREAFRLHPIAPFNLPHVAIADTIVAGYHVPKGSNVILSRLALGRNPTVWDEPLH
chr7	566707352	1		chr7_566707352_1	CYP77B2	96.67	60	DAWRPERFLEGGEGHDTDITGTRALRMMPFGAGRRICPAATLGVLHIQLTLANMIRELRW
chr7	569398579	1		chr7_569398579_1	CYP99A43_7D_Triticum_aestivum(wheat)	100	53	KEGMRLHPVVPLLLPRVCRETCDVGGLQVAGGSRVMVNVWAIARSPEYWHDAE
chr7	597064255	1		chr7_597064255_1	CYP71F51_7D_Triticum_aestivum(wheat)	100	60	YMQMVIKEVLRLHPPGPLVPRMTREDCTIMGYDMFKGTNVYVNVFAISRDPRSWENPEEF
chr7	597138345	1		chr7_597138345_1	CYP71AA16_7D_Triticum_aestivum(wheat)	100	53	FRLHPPVPLLIPRLCTEQRKIMGFDVPPGTTVFANVWAIGRDEKSWTDAEEFK
chr7	602239488	1		chr7_602239488_1	CYP71BU14_7D_Triticum_aestivum(wheat)	100	60	YLRAVIKETMRLHPPGPLLVPRESMKHARVQDYHAPSGTRVIVNAWAIGRDPAAWEHVGE
chr7	606763499	-1		chr7_606763499_-1	CYP729A8	86.67	60	MKYTAKVVEETIRMANIAPMVHRVANRDVEYRGYTIPKGWAVLVWLRSLHTDPNYYEDPL
chr7	615968997	1		chr7_615968997_1	CYP93G21_7B_Triticum_aestivum(wheat)	100	60	LRLRPPAVIAHREAVEPIRVRGYTIPAGTSVFFNIYSIGRDAAWWEDPLEFRPERFMPGG
chr7	617810275	1		chr7_617810275_1	CYP71AF17_7D_Triticum_aestivum(wheat)	88.68	53	SRVREEALQELPYLRLVIKETLRLHATVPLMLPRESREATRVLGYDVPQGTMV
chr7	617845417	-1		chr7_617845417_-1	CYP71AF15_7D_Triticum_aestivum(wheat)	100	52	ELPYLRRVIKETLRLHAVAPLLLPRECREPSRVLGYDVPQGAMVLVNVWAIG
chr7	617877992	-1		chr7_617877992_-1	CYP71K50_7D_Triticum_aestivum(wheat)	100	59	GRDAGSWGADAEEFRPERFDGSGVDFRGTDFEYIPFGAGRRMCPGVAFGLANVELALAS
chr7	617896621	1		chr7_617896621_1	CYP71AF13_7D_Triticum_aestivum(wheat)	100	60	VIKETLRLHPVVPLLPRECQGPCRILGYDVPKGAMVFVNVWAIGRDSASWGTDAEEFRPE
chr7	617903375	1		chr7_617903375_1	CYP71AF13_7D_Triticum_aestivum(wheat)	88.33	60	CRVLGYDVPKGAMVLVNAWAIGRDIASWGADAEEFRPERFEEAGDAAADFRGTNFELVPF
chr7	617904589	1		chr7_617904589_1	CYP71AF13_7D_Triticum_aestivum(wheat)	88.33	60	CRVLGYDVPKGAMVLVNAWAIGRDIASWGADAEEFRPERFEEAGDAAADFRGTNFELVPF
chr7	617962565	-1		chr7_617962565_-1	CYP71K51_7A_Triticum_aestivum(wheat)	91.38	58	CRVLGYDVPKGTMVLVNAWAISRDPIYWEAVEEFVPERFECGEAADFKGADMEYTPFG
chr7	617987834	1		chr7_617987834_1	CYP71Y29_7A_Triticum_aestivum(wheat)	100	59	PERFEAEGGGSAAGVDFRGADFELLPFGAGRRMCPGMAFGLANVELALASLLLHFDWEA
chr7	618023038	-1		chr7_618023038_-1	CYP71Y29_7B_Triticum_aestivum(wheat)	96.36	55	PYLHLVIRETFRLHTPLPLLLPRECREEPACRVLGYDVPRGTQVLVNVWALGRDE
chr7	618212010	-1		chr7_618212010_-1	CYP71AF12_7D_Triticum_aestivum(wheat)	100	53	RLHPAAPLLLPRECPESRHVLGYTVPKGAMVLVNAWAIGRDAATWGADAEEFR
chr7	618536144	-1		chr7_618536144_-1	CYP72A601_7B_Triticum_aestivum(wheat)	100	60	EAYKETELGGVTYPAGVTFALPIVCIHHDPDVWGEDVDEFKPERFAEGIAGASKNSPAFF
chr7	622510620	-1		chr7_622510620_-1	CYP86B43_1D_Triticum_aestivum(wheat)	100	82	VNFILAGRDTSSVALAWFFWLLSKNRGVEAKILQEVEGIVAARGRCGEVEEELVFQPEEVKRMEYLHAALSEALRLYPSVPV
chr7	630024092	1		chr7_630024092_1	CYP71AB21_7D_Triticum_aestivum(wheat)	100	60	LQCIIKETLRLHTPGPLLMPRECQEHCKILGYDVPKGTTVLVNAWAISRDPECWDEPEAF
chr7	630392142	1		chr7_630392142_1	CYP729A8	86.67	60	MKYTAKVVEETIRMANIAPMVHRVANKDVEYRGYTIPKGWAVLVWLRSVHTDPNYYLDPL
chr7	632997579	1		chr7_632997579_1	CYP71AF17_7D_Triticum_aestivum(wheat)	100	52	QELPYLRLVIKETLRLHAAVPLLLPRECREPSRVLGYDVPQGTMVLVNAWAI
chr7	632999645	1		chr7_632999645_1	CYP71AF17_7D_Triticum_aestivum(wheat)	100	56	GTDFQLVPFGAGRRMCPGITFGLAVMEVALASLLFHFDWELPGGTEELDMAEAFGI
chr7	634299398	-1		chr7_634299398_-1	CYP71C171_7D_Triticum_aestivum(wheat)	98.33	60	YLKAVVKETLRLHPPAPLLLPRLSMADCDDVNGYTVPAGTQVMVNAWALGRDTGSWGEKA
note: blasting against Aet_pseudo_02022018
						1	247 seqs
						98-99.9%	87 seqs
						60-97.9%	216 seqs
						<60% but >40%	2 seqs

## Sheet: Nelson P450 names and sequences
original order	sorted order	pseudomolecule	start	end	strand			seq ID		best hit in plant P450s	%ID	aln length	comments	CYP name	sequence
1	1	chr4	105629119	105633051	1		CYP51	chr4_105632533_1	chr4_105632533_1_Aegilops_tauschii	CYP51G1_4D_Triticum_aestivum(wheat)	100	490		CYP51G1	MDLLSDAQPQWLLAGAALLLATVAFLRVLLGSGGRGKRAPPTIPGAPVVGGLLRFLRGPIPLIRAEYARLGPVFTVPILTRRITFLIGPDVSAHFFKSNESDMSQQEVYRFNVPTFGPGVVFDVDYQVRQEQFRFFTEALRANKLRSYVDQMVAEAEEYFSKWGESGTVDLKYELEHLIILTASRCLLGREVREKLFDDVSALFHDLDNGMQPISVIFPYLPIPAHRRRDQARTRLAEIFATIIKSRKASGQSEEDMLQCFIDSKYKNGRQTTESEVTGLLIAALFAGQHTSSITSTWTGAYLLKFQQYFAEAVEEQKEVMKRHGDKIDHDILAEMDVLYRCIKEALRLHPPLIMLLRQSHSDFSVTTREGKEFDIPKGHIVATSPAFANRLPHIFKNP…
5	2	chr2	165851341	165852901	1		CYP51	chr2_165852386_1	chr2_165852386_1_Aegilops_tauschii	CYP51G3_2D_Triticum_aestivum(wheat)	100	496		CYP51G3	MELAIVLWVACFPIFLAILSTMMARRRPTVSQTTKRSPSPPPMAPGAPLVGILPALLAKGPLQVIRNAHTEMGSVFTVRLLHRKVTFLVGPDVSSHFYQGLDMEISQDEVSRFTIPTFGPGVAFDVDFATRREQFRFFGDAMKPAKLRTYAGLMVREVEEYFARWGQSGTVDLKQELEHLVTLVASRCLFGEEVRAKMFGEVATHLRELNDGMRLVTIMFPHLPIPAHRRRDRARARLGEIFSDIVSSRKASYPDGGPDDMLQCLIDSRYKDGRATTETEVVGMLVSALFAGQHTSSSTSTWTGARLLVRANSEHLRAAVREQERIVARHGDRMDYEVLQEMDTLHRCVKEVLRLHPPAMMLLRHARRSFTVRTREGDEYEIPEGRTVASPLVLHNCLP…
2	3	chr1	18050237	18051760	-1	pseudogene, has internal stop codon	CYP51	chr1_18050689_-1	chr1_18050689_-1_Aegilops_tauschii	CYP51G38_1A_Triticum_aestivum(wheat)	87.02	493		CYP51G47P	MELTRVLWLASFPIFVTIVLIEMARRRATFSLTTKQSPPPPPMATGAPLLGILLALHTKGPLQVIRDTHAEMGSVFTVRLLHRKVTFLVGPDVSSHFFQGLDSEISQDQVSQFTIPTFGPGVAFDVDFATRREQFRFFGDAMKPAKLRTYARLMVQEVEDFFAKWGPTGTVDLKQELEHLVTLVASRCLFGEEVRAKMLAEVATHLRELNDGMRLVTILFPHLQIPAHRRRDTARARLDEIFSGIVSSRKTSYPDGGPNDMLQCLIDSRYKDGRATTKTEVVGMLVSALFAGQQTSSSTGTARANANHLHAAVQEQERIMERHGDRVDYEVLQEMETLHRCIKEVLRLHPPAMMLLRHARRSFTVQTKDGDVYEVPEGRTVASPLVIHNRLPHVYRDPE…
3	4	chr2	4361322	4362961	1		CYP51	chr2_4362446_1	chr2_4362446_1_Aegilops_tauschii	CYP51G38_1A_Triticum_aestivum(wheat)	84.63	501		CYP51G48	MEFPGVLWLAFVPISVAVVSIMMARRRATSFLTTKRSPPPPPTAAGAPFLGILPALVAKGPLRVLRDAHAEMGSVFTVRLLHRKVTFLVGPDVSSHFYQGLESEISQDEVSQFTTPTFGPGVAFDVDFVTRREQFRFFGDAMKPAKLRTYARLMVREVEYYFARWGQSGTVDLKQELEHLVTLVASRCLFGEEVRAKMLVEVATHLRELNDGMRLVTILFPHLPIPAHHRRDKARARLGEIFSDIVSSRKASCPDGSRNVVDDMLQCLIDSRYKDGRATTETEVVGMLVSALFAGQHTSSSTGTWTGARLLARANAKHLRAAVQEQERIMARHGDRVDYEVLQEMDTLHRCVKEVLRLHPPAMMLLRHARRSFTVRTSEGVEYEVPEGRTVASPLVIHN…
4	5	chr2	31461692	31463301	-1		CYP51	chr2_31462207_-1	chr2_31462207_-1_Aegilops_tauschii	CYP51G38_1A_Triticum_aestivum(wheat)	83.07	502		CYP51G49	MESTRVLWLAFVPIFAAIIVSITMARRRMAFSPTTKRPPPPPPMAAGAPLLGILPALLAKGPLQVIHDAHAELGSAFTMGLLHRKVTFLVGPDVSSHFYQGLDSEISQDEVSRFTIPTFGPGVGFDVDLATRREQFRFFGDAMKPAKLRTYAGLMVREVEEYFARWGQSGAVDLKKDLEHLVTLMASRCLFGEEVRTKMLAEVATHLCELNDGMRLVTILFPHLPIPAHRRRDRTRARLGEIFSGIISSRRASYLDGGARNVKDDMLQCLVGSRYKDGRATTETEVVGVLVSALFAGQHTSSSTGTWTGARLLERANAEHLRAAVREQERIVARHGDRVDYEVLQEMDILHRSVKEALRLHPPAMLLLHHARRSFTVRTREGDEYEVPEGRTVASPLVL…
7	6	chr7	3080311	3092564	1		CYP51	chr7_3081364_1	chr7_3081364_1_Aegilops_tauschii	CYP51G38_1A_Triticum_aestivum(wheat)	82.04	501		CYP51G50	MELPRVLWPAFVAIFVTVVSIMMARRRTMFSQKTKRSPPSPPVAAGVPLLGVLPALLAKGPLHVIRDAHTEMGSVFTVRLLHRKVTFLVGSEVSSHFYQGLESEISQDEVSQFTTPTFGPGVAFDVDFTTRREQFRFFGDAMKPAKLREVEEYFARWGQSGTVDLKQELEQLVTLVASRCLFGEEVRAKMLVEVATHLRELNDGMRLVTILFPHLPIPAHRRRDRARARLGEIFSNIVSARKASYPNSSRHVVDDMLQCLVDSRYKDGRATTETEVVGMLVSALFAGQHTSSSTGTWTGARLLARANAKQLCAAVQEQERILARHGNRLDYEVLQEMDTLHRCVKEVLRLHPPAMMLLRHARQSFTVRTSEGDEYEVPEGRTVASPLVIHNRLPHVFRD…
6	7	chr3	7088595	7090235	1		CYP51	chr3_7089687_1	chr3_7089687_1_Aegilops_tauschii	CYP51G39_3B_Triticum_aestivum(wheat)	93.12	509	94% to CYP51G40_U_Triticum_aestivum over 366 aa	CYP51G51	MELATVNWVAYVVPIAVTTTIIISAMMARRRRRRAERSPCARPPPVAAGAPLVGVLPWLLAKGPLQVIRDAHAELGSVFTVRLLHREVTFLVGPDVSSHFYQGLDSEVSQDEVSRFTIPTFGPGVAFDVDLATRREQIRFFGDAMKPAKLRTYAGLMVREVEEYFTRWGESGMVDLKQELELLVTLVASRCLFGEEVRSKMLREAATHLRELNDGMRLVTILFPHLPIPAHRRRDRARARLGEIFSDMVRSRREAGRPVDDMLQCLIDSRYKDGRATTDTELVGMLLSALFAGQHTSSSTGTWTGARLLARANAEHLRAAVREQERVVGRYGDRVDYEVLQEMETLHRCIKEVLRLHPPAMMLLRHARRSFTVRTREGDEYEVPAGRTIASPLLIHNRL…
8	8	chr5	4819347	4820901	1	pseudogene	CYP51	chr5_4820395_1	chr5_4820395_1_Aegilops_tauschii	CYP51H13_5A_Triticum_aestivum(wheat)	97.56	491		CYP51H13P	MDLTSLTAMWWAIALLFITVLATKITRARITNIDPQRTTGQLPPMVNGLALLGLLPTLLKKGLPPMVNYLYVNYGSVFTVSCFGVIKVTLLIGPEATTHFFQGLESEISHGNLLEFTVPMFGKAVGYGRDTATRMEQMRFHSEALRASRLRSHVSPMLQEVEDFFAKWGEKGVVDLKLEFEQLLMLISG*CLLGKEVRENMFDEVYTLFREIEKGVTLISFLFPYLPTPANWQRDRARIRLTEILSNVVESRKSSGRVEEDTLQKLIDSKYKDGRPTTVEEVVGLIIGLLFAGKHTSSHTSTWTGARLLSHPAFLRAAIEEQHQVAKKYKDGLEYNAFLEMDTLHNCIKEALRKNPATPLLVRRVHKRFTVQTKEGQQYDIPQDYIVATPTIVNNNIPY…
9	9	chr2	13167260	13169961	-1	pseudogene	CYP51	chr2_13167745_-1	chr2_13167745_-1_Aegilops_tauschii	CYP51H31_2B_Triticum_aestivum(wheat)	97.59	332		CYP51H60P	DYFAKWGEEGVVDLKDELNQILMLIASQCLLGNEVREKLFGEIYTLFSGIEGGVNLVSFMLPYFPVPANHRRDKARIRLTEIVYDIMRSRKTCGRVEQDVLQKLMDSRYKDGCRTTKAAIAGMIIALIFAGKHTSSIVSTWTGACLLTHTKFLDVVVEEQREIMRKYKDKIDYNVLSKMETLHSSIKEAGRMHPATLGLIRQTQKNITVRTKEGTEYGILKDDTLVNLVMLTSKLSHIYKDPEVYDPYRFLPGREEDKVGGKFSYAIFGGGSHVCPGEAYAFLQIKIIWSHLLRNFELKLASPFPKTDWSKFMLEPKGKVLVNYKRRHLESS*
14	10	chr2	13303769	13306710	1		CYP51	chr2_13306195_1	chr2_13306195_1_Aegilops_tauschii	CYP51H31_2D_Triticum_aestivum(wheat)	99.4	499		CYP51H31	MDLTIDAMWLFLAIFLITAIIIKNANARVTSDPGCTRPPPPVVNIIALLKLLPTLCTKGPEVTMTYLYNTFGSVFTIRFLWKRISFLVGPEVSGPFFQGSESEVSQGNMNEFTVPMFGQENGYAVDYNTRSQEIRFFIDALKPSQLRSHVDPMLREVEDYFAKWGEEGVVDLKDELNHILMLIASRCLLGNEFRESLHGNEVREKPFGEIYTLFSGIEEGVNLVSFMLPYFPVPANHRRDKARIRLTEIVYDIMRSRKTCGRVEEDVLQKLMDSRYKDGRRTTEAAVAGMIIGLIFAGKHTSSNVSTWTGACLLTHTKFLDAVVEEQREIIRKYKDKIDYNVLSKMETLHSCIKEAGRMHPVTLGLIRQTEKNINVRTKEGTEYGIPKGDTLVNLVMLT…
10	11	chr2	13174092	13176851	-1	pseudogene	CYP51	chr2_13174607_-1	chr2_13174607_-1_Aegilops_tauschii	CYP51H33_2D_Triticum_aestivum(wheat)	96	428		CYP51H61P	VAIILITAIVTKIANARVIFDPVCTRLPPPVVNNNALLKLLPTLCTKGPEVTMTYLYNKFGSVFTVSILWKRISFLVGPEFSGPFFQGSESEVSQGNFNEFTVPMFGQENGFAVDCSTRMDEIRFYIDSLKPSQLRSHVDPMLREVEQDYFGKWGDVGVVDLKYEFNHILMLIASRCLLGKEVRGKIFGEFYTLFTEIDEGGVNLVSFMLPYIPIPVNRRSDRACIKLTEIVTEILRSRKICNRIEDDVLQKLMDSRYKDGRRTT*AAVAGMIIALIFAGKHTSAVVSTWTGACLLTHEKFLDAAINEQKEIMRTYGDKIDYNVLLEMETLHSCIREAGRMNPISFGLVGQAQKNIIVRTKEGVEYDIPKGDTLVNLVMLTHKLPHIYKDPKVYDPDRF…
12	12	chr2	13246339	13249181	-1		CYP51	chr2_13246854_-1	chr2_13246854_-1_Aegilops_tauschii	CYP51H33_2D_Triticum_aestivum(wheat)	99.8	490		CYP51H33	MDLTIGTMLLVLAIILITAIVIKIANARVTFDPVCTRPPPPVVNSIALLKLLPTLCTKGPEVTMTYLYNKFGSVFTVSILWKRISFLVGPEVSGPFFQGSESEVSQGNFNEFTVPMFGQENGFAVDCSTRMDEIRFYIDALKPSQLRSHVDPMLREVEDYFGKWGDVGVVDLKYEFNHILMLIASRCLLGKEVREKIFGEFYTLFTEIEEGVNLVSFMLPYIPIPVNRRRDRARIKLTEIVTEILRSRKICNRIEEDVLQKLMDSRYKDGRCTTEAAVAGMIIALIFAGKHTSAVVSTWTGACLLTHEKFLDAAFNEQKEIMRTYGDKIDYNVLLEMETLHSCIKEAGRMNPISFGLVRQAQKNIIVRTKEGVEYDIPKGDTLVNLVMLTHKLPHIYKD…
13	13	chr2	13258563	13259036	-1	1 aa diff in exon 1 to seq beginning at 13249181, exon 1 only, pseudogene fragment	CYP51	chr2_13258563_-1	chr2_13258563_-1_Aegilops_tauschii	CYP51H33_2D_Triticum_aestivum(wheat)	98.73	158	1 aa diff to CYP51H33 Aegilops	CYP51H33P1	MDLTIGTMLLVLAIILITAIVIKIANARVTFDPVCTRPPPPVVNSIALLKLLPTLCTKGPEITMTYLYNKFGSVFTVSILWKRISFLVGPEVSGPFFQGSESEVSQGNFNEFTVPMFGQENGFAVDCSTRMDEIRFYIDALKPSQLRSHVDPMLREVE
11	14	chr2	13177381	13177854	-1	1 aa diff in exon 1 to seq beginning at 13249181, exon 1 only, pseudogene fragment	CYP51	chr2_13177381_-1	chr2_13177381_-1_Aegilops_tauschii	CYP51H33_2D_Triticum_aestivum(wheat)	98.73	158	100% to CYP51H33P1	CYP51H33P2	MDLTIGTMLLVLAIILITAIVIKIANARVTFDPVCTRPPPPVVNSIALLKLLPTLCTKGPEITMTYLYNKFGSVFTVSILWKRISFLVGPEVSGPFFQGSESEVSQGNFNEFTVPMFGQENGFAVDCSTRMDEIRFYIDALKPSQLRSHVDPMLREVE
15	15	chr2	13315636	13316573	1	pseudogene with two indels	CYP51	chr2_13315636_1	chr2_13315636_1_Aegilops_tauschii	CYP51H33_2D_Triticum_aestivum(wheat)	63	313	same as chr2_13316220 with 2 indels	CYP51H62P	GVVDLKEELNQILMLIASRCLLGNEVREKIFGELYTFLLKSKEXXXXXXFMLPYNPVPVNRRRNRAWIKLTEIVSEILRS*KRCNRVEEDVLQKLMDSRYKDGRHTTEAAVAGMITALIFAGKHTSTIVPTRTGAFLLTHAKFLDAVVKEQKEIMRTYEERXXXKNVVVRTKEGVEYVIPKGXXXRDEDKVGGKCSYTTFGGGSHVCTGQAYAFMQIKIIWSPLLRNFELKLTFPFPKTDWSKYALEPKGKVMV
29	16	chr2	13315636	13316579	1	pseudogene	CYP51	chr2_13316220_1	chr2_13316220_1_Aegilops_tauschii	CYP51H33_2D_Triticum_aestivum(wheat)	79	316		CYP51H63P	GVVDLKEELNQILMLIASRCLLGNEVREKIFGELYTFLLKSKEXXXFMLPYNPVPVNRRRNRAWIKLTEIVSEILRS*KRCNRVEEDVLQKLMDSRYKDGRHTTEAAVAGMITALIFAGKHTSTIVPTRTGAFLLTHAKFLDAVVKEQKEIMRTYEEKIDYKYNILLAMETLHSCIKEAGLMHPIPLGLVREAKKNVVVRTKEGVEYVIPKGxxVNLVMITSKLPHIYKDPEVYDPDRFRSGRDEDKVGGKCSYTTFGGGSHVCTGQAYAFMQIKIIWSPLLRNFELKLTFPFPKTDWSKYALEPKGKVMVN*
16	17	chr5	4816074	4817756	1		CYP51	chr5_4817232_1	chr5_4817232_1_Aegilops_tauschii	CYP51H35_5D_Triticum_aestivum(wheat)	99.59	493		CYP51H35	MDLASLTAVWWAVALLFITVLVTKISRARVTTVDLHRTTGQLPPLVNGVALLKLLPTLLNKGLPAMVNDLYVKYGSVFMVSSFGVKVTLLIGPEVTAHFFQGLESEISHGNLFEFTVPMFGEAVGYGRDTATRTEQMRFHIEALRPSRLRSHVYPMLQEVEGYFAKWGEEGIVDLKLEFEKLLMLISSRCLLGKEVRENMFDEVYTLFHEIEDNGVTLISFLFPYLPTPANRKRDKARIRLTQILSDVVDSRKNSGRVEDDTLQKLIDSKYKDGRPTTVEEVVGLIIGLLFAGKHTSSHTSTWTAACLLSHPTFLRAAIEEQQQISSKYKDMGLDYNAFIEMDTLHRCIKEALRKHPPTPMLVRRAHKQFMVKTKEGKEYDIPQDHIVATPTIVTNNIS…
17	18	chr5	6320217	6321881	-1		CYP51	chr5_6320729_-1	chr5_6320729_-1_Aegilops_tauschii	CYP51H36_5D_Triticum_aestivum(wheat)	99.2	498		CYP51H36	MDFTSLTVLWWAIALLFITVLATKISRASITNIDPQCTTGQRPPVVHEAALLKLVPTLLKKGLPAMINDLYVKYGSVFTVSCLGVTKVTLLIGPEVTAHFFQGLESEISHGNLFEFTVPMFGEAVGYGRDTATRTEQMRFHIEALRPSRLRSHVYPMIQEVEGYFAKWGEEGIVDIKLEFEKLLMLISSRCLLGKEVRENMFDEVFRLFHEIEDNGVTLISFLFPYLPTSANRQRDRARIRLTQILSDVVECRKSSGTVEEDTLQKLIDSKYKDGRPTTVAEVVGLIIGLLFAGKHTSSHTSTWTAACLLSHPTFLRAAIEEQQQINNKYKDKGLDYNAFIEMDTLHCCIKEALRKHPPTPMLVRMAHRRFTVKTIEGKQYDIPQDHIVASPTIVNNNI…
18	19	chr5	4842914	4844994	-1		CYP51	chr5_4843426_-1	chr5_4843426_-1_Aegilops_tauschii	CYP51H37_5D_Triticum_aestivum(wheat)	100	491		CYP51H37	MEMASSAKWFAVALVFITVILLRVIRGRRMAAAPASEKPPPPVVNGFALLGLLPRLLTMDLRTKINCLHDKYGSVFTVSPFGLTNVTFLIGPEVQSHFFQGLESEINHGNLLEFLVPMFGQEIGQGVDAATRTEQSRFYLDALKQSKLRRHLDPMLQEVESYFGKWGLEGVVDLKHEFEELLMLISSRCLLGKEVREKMFDEFYKLFRDVENGVNMISVFFPYIPIPANRRRDKARLKLIELLSGTVRSRKSSPSVEEDVLQRLIDSKYKDGRSTTETEVTGMIIALIFGGKHTSSLASTWTGACLLTHPKFLAAASQEQKEIMMKYKDKIEYDALLEMNTLHNCIKEALRLNPPTTMLVRKALKHFTVRTRQGQEYGIPKGHTLASPIIQNNYLPYIY…
19	20	chr5	6253945	4845000	-1		CYP51	chr5_6254457_-1	chr5_6254457_-1_Aegilops_tauschii	CYP51H38_5D_Triticum_aestivum(wheat)	99.8	492		CYP51H38	MNMTAGWAAVWFTAGLVFITVIVLRIIRGTSIVAPTSGKPPPPVVNGLAFLGLLPRLLTIDLPAKINCLYSKYGSVFTVSPFGLCNVTFLIGPEVQAHFFQGLESEINHGNLLEFLVPMFGQEVGQGVDAATRTEQSRFYLDALKQSKLRRHLESMLQEVEGYFGKWGQEGIVDLKHEFEELLMLISSRCLLGKEVREKMFDEFYKLFRDVENGVNMISVFFPYIPIPANRRRDKARLKLIELLSETVRSRKSSVGAEEDVLQRLIDSKYKDGRSTTETEVTGMIIALIFGGKHTSSLACTWTGASLLTHSKFLAAASQEQKEIMMKYNNKIEYDALLEMNNLHSCIKEALRINPPTTMLVRKALKHFTVRTRQGQEYDIPKGHTLASPIIQNNNMPYI…
20	21	chr5	6392437	6392483	1		CYP51	chr5_6391971_1	chr5_6391971_1_Aegilops_tauschii	CYP51H39_5D_Triticum_aestivum(wheat)	99.39	488		CYP51H39	MDMLATRTTWLAIALFFITVVATKISRWKSNIHHLSTRPLPPVVNVLALLPSLFKKGFGDTINDLYTRYGSVFTINLLGPKITLLVGPDVSAHFFQGLESEISFGNFAEVTVPIFGQEVLYGVDAAIRSEQVNFMLDILKPSKLRSLVDPIFQEVEAYFAKWGQDGIVDLKHELEQVLMFISSRCLLGYEVREMMLKEVYSLFHELENGLNFFSYLFPYIPTPTNRRRDKAHIRLKEIFTTTIRSRRSSSRAEEDALQRLMDSKYKDGRSVTEGEISGMVMALIFAGKHPSSSTSIWAGAFMLSNTKVLIAAMEEQKHILSKYKNQIGYDALLEMDTLHRCIKEAIRMHTPAQMLARKAHKKFKVQTKEGKEYDIPGGHNVVIPTAFNNKLAHVYSDPH…
21	22	chr4	522527490	522529132	-1		CYP51	chr4_522527996_-1	chr4_522527996_-1_Aegilops_tauschii	CYP51H40_3B_Triticum_aestivum(wheat)	94.48	489		CYP51H40	MYVMDWAAASTTLFSVVLCSIVTVVAAKLLKAKNKLNNHVYTRPLPPVVNVLALIPPLLNKGLQATIQDLYTKFGSVFTINLLRPKVTLLIGPEVSAHFFQGLDSEISWGNLLEFTVPMYGQEVGYGVDTATRNEHSNFIIQALQPSKLRSHVDPIFQEVEAYFAKWGQDGTVDLKHELEQVLMLTSSRCLLADVVRHQMILTEIYSLLHELENGANIISFLFPYIPTPTNRRRDKAHIKLKEIFSAAVRSRSQAQEDALQRPIDSKYKDGRPTAIAEISGMMIILISTSRHTSSHTSIWTGARLLSNTKFLMAAVEEQKHIIRNYGNQIDYHAMSEMDTLHNCIKEALRMHPAGPVLFRKAHKTFKVHTKEGNEYDIPGGHNVTIPTVFNSKLPYIYR…
22	23	chr4	517646028	517647985	1		CYP51	chr4_517647479_1	chr4_517647479_1_Aegilops_tauschii	CYP51H41_4D_Triticum_aestivum(wheat)	98.56	486		CYP51H41	MDMLATRTTWLAIGILFIIVVSTKILRWKSSVHPLSTRPPPPIVNVLGLLPSLFIKGFGVTINDLYTKFGSVFTVSLLGPKITLLVGPEVSTHFFQGLESDIGVRKFMEVTIPIFGQEVFYGVDTATCSEQLNFIVDALKPSRLRSLVDPMSQEVEAYFAKWGQDGIVDLKHELEQVLMFISSRCLLGYEVRDMMLEEVYSLFHDHANGLNFLSFLFPYTPTPRNRRRDKAHIRLKEIFTATIRSRRSSGRVEEDALQRLMNSKYKDGRFTTEAEISGMIMGLVVAGHISSTSTSTWTGACMLSNTKFLIAAMEEQKHIISKYKNQIGYEALSEMDTLHRCIKEAIRMHTSAPVLVRKAHTKFRVHTKEGEEYDIPGGHNILVPTALNNKLAHIYSDPH…
23	24	chr4	510868686	510870616	-1		CYP51	chr4_510869198_-1	chr4_510869198_-1_Aegilops_tauschii	CYP51H42_4D_Triticum_aestivum(wheat)	99.59	488		CYP51H42	MDMLATRATWLAIAIFFITVVATKISRWKSNVHLFPTRPLPPVVNVLALLPSIFNKGFGVTIADLHTRLGSVFTINLFGPKITLLVGPDISAHFFQGLESEISFGNFTEVTVPIFDQEVLYGVDMATRSEQIHFIVDVLKPSKLRSLVDPILQEVEAYFSSWGQEGIVDLKHELEQVLMFISSRFLLGYEVREMMLEEVSSLFHELENGLNFFSFLFPYIPTPTNRRRDKAHIRLKEIFTTTIRSRRSSGRVQEDALQRLMNSKYKDGRSASEAEICGMIIALIFAGKHPSSSTSIWTGAFMLSNTKFLIAAVEEQKHIISKYKNQIGYDAFSEMDTLHRCIKEALRMHTPAQMLARKAHKKFKVQTKEGKEYDIPEGHNIVIPTALNNKLAHVYNDPH…
24	25	chr5	6406497	6406708	1	pseudogene	CYP51	chr5_6406547_1	chr5_6406547_1_Aegilops_tauschii	CYP51H43_5B_Triticum_aestivum(wheat)	84.51	71		CYP51H64P	NKDKVGGKFPFTTFDGGRHMCPGMSFVYLQKKLIWSHLLRNFDLELISPFPEADLSKLGQGPKGKVMVSYK
25	26	chr1	357964762	357966285	-1	pseudogene	CYP51	chr1_357965358_-1	chr1_357965358_-1_Aegilops_tauschii	CYP51H45_1D_Triticum_aestivum(wheat)	99.73	365		CYP51H45P	MMNSITLLGQLPKLLMRGIQATIHDLYTSFGSVFTVNLFGHKITFLIGPEVSAHFFQALESEISQGNFYEFTVPMFGQEVGFGVDSAT*SEQSRFSVDALRPSKLRNHVDPMLQEVEGYFAKWGQEGIIDLKHELSQVLLLISGRCLIGKEIREKMLDEFYALFHDVENGLNLINLAFPYIPTTINRRRDRARSKLVEMLSEIVRSRMSHDQTEEDALQNLIHSKYKDGHSMTESEVTGLMVALVFVGKHTSSQSCAWTGAYLLNDIKCLVAVIEEQKQIIKKHGDQIDYGVLLEMDTLHGCIKEALRLHPTTPMLIRKAHKHFTVWTKEGNEYNIPAGHTLVSPKIFNNNIPSIYKDPRVYDPERFGSQRKEDKVGGKFSYTSFSGGRHACPGEAYAY…
26	27	chr2	8851132	8852981	1		CYP51	chr2_8852469_1	chr2_8852469_1_Aegilops_tauschii	CYP51H47_2D_Triticum_aestivum(wheat)	99.81	515		CYP51H47	MHMGMDGITIHTAACFTIAFLFLTTIISEIIARIRTIHLTRKGKRSSITLRPPQVVSGAPLMAALFTLVTPKKGLHAAIHELHMKMGSVFTVNLFGLKKVTFLVGPEVTPHFFKGSPSEIDFGDTAKIIVPVLGQGVLFGVDMATRNEQIRFCTKAIQPARLRRDVQSMVCVVEDYFAKWGQSGTVDLKHELGHLIVLIANRCLLGNEIKGNNMEEVSRLLHELFENSFHMINLFFPHLPIPPHRRRDEARARLGEILHEIVRSRRRISPARVMDSNDDDEGDVLQSFIDSKYSDGRSMTESEIVGLLIAILFAGQHTSSSTSTWTGACLLSNQKYMTAAMKEQKKIIEQNGEPIDYTILSKMDALRCCIKEALRLYSPTPLLLRHAHKSFTVQTRDGM…
27	28	chr3	49113519	49115159	-1		CYP51	chr3_49114010_-1	chr3_49114010_-1_Aegilops_tauschii	CYP51H48_3D_Triticum_aestivum(wheat)	99.59	491		CYP51H48	MDQATILVVAACLAAATAALILRRPRNGKPPGGVALLPPVASGVSAIAALGTLVTKGLPAVIHDLHGELGSVFTVSLLGLKKVTFLVGPEVTTHFFKGSESEIRQSDIYKITVPIFGRGVLFDVDLPTRSRQISFLSDAIKPVNLRGHVDSMVREVEDYFGKWGEHGTVDLKQELGLVLMRIANRCLLGEQIGDNMFDEVTHLLHELFENGLHMTSLFFPYLPIPPHRRRDAARAKLGEIFHEAVRARRASGRAENDVLQKLVESRYADGRPVTESEIAGLLIGMIFAGQHTSASAAIWTGACLLSHGDGRHLVAAVEEQKQIIARHGRERVDYDVLREIGILRCCIMEALRMHAPANVIIREANKSFSLQARDGGRYAIPKGHTLVTSPAVNNRLPHI…
28	29	chr4	524777197	524779852	-1		CYP51	chr4_524777712_-1	chr4_524777712_-1_Aegilops_tauschii	CYP51H49_4D_Triticum_aestivum	99	496		CYP51H49	MDITFPPGAYFSIAVIFLTVIITKVIVRRIVAPRPEKGSLQPPIASGASLVAALPTILTKGLHPVLHDLHAKLGSVFTINLFGLKKVTLLVGPEVTSHFFQAKNSELCHPDMYKFTIPIFGKGVIFDVDFETRNRQIRFAIDAMKPTQLRSKVDYMVHEVQDYFSKWEQEGIIDLKHELAEVLMLIASRCLLGKEVREKMFEEVSVLINDLCKNGMHFISLFFPYIPIPAHRQRDKARAKLGHIFHEIVRSRKISGQVEDDVLQKLIDSKCMEDGRSMTESEITGLLISLLFAGQHASSSAASWAGACLISHEKYLAAAVEEQQKIIGKHGQHVDYSILLEMGTLHSCIKEAIRMHSPSAMVMRHVKKNFTVQTREGYSYEIPEGHTVATSIVVGNQLP…
30	30	chr5	8307379	8309157	1			chr5_8308783_1	chr5_8308783_1_Aegilops_tauschii	CYP71C6_5D_Triticum_aestivum(wheat)	99.62	528		CYP71C6	MALEAAYHYLQRAVGHGTSTEALLLTVLLLLIIRLAWVRAFATTTASTKCKQQLPPTPPGKLPIIGHLHLIGSHPHVSFRDLAAKHGRDGLMLVHVGAVPTVVVSTPQAAEAVLRTHDHVFASRPRNPVADIIRYNSTDIAFAPYGDYWRRARKVVNTHLLSVKMVYSKRHDREEEVRLVVAKICELAMAAPGKALDMTELLGGYASDFVCRAVLGESHRKHGRNELFRELTEISASLLGGFNLEDYFPRLANLDVFLRVVCSKAMGVSKRWDNLFNELIAEYEHGKEDNAEDFVHLLLSLKKEYGLSTDNVKAILVNMFEAAIETSFLVLEYSMAELINNRHVMAKVQKEVRESTPKGEKLDLIMEEDLSRMPYLKATIKEAMRIHPPAPFLLPHFST…
31	31	chr5	8322156		1			chr5_8322156_1	chr5_8322156_1_Aegilops_tauschii	CYP71C7_5D_Triticum_aestivum(wheat)	99.24	527		CYP71C7	MALEAAFHYLQLAGIHGTSTPAVLLTILLLLIIRLAWVRTTTASTRFGKQQQLPPSPPGKLPIIGHLHLLGSQTHISIRDLDAKHGRNGLLLLRIGAIPTLFVSSPSAAEAVLRTHDQIFASRPPSMAADIIRYGPTDIAFAPYGEYWRQARKLLTTHMLSAKVVHSFRHGRQEEVRLVINKIREAATRGTAVDMSELLSGYTNDVVCRAVLGESHRKEGRNRLFSELTEINVSLLGGFSLENYIPPNMVMADVLLRLVSVKARRLNKRWDELFNEIIEEHLHPSKPSSGEQQAADFIDLLLSLKEEYGLTTDNIKAILVDMFEAGIETSYLTLEYGMAELMNNRHILKKLQEEVRSQGKKLDMITEEDLGSMAYLRATIKETLRLHPPAPFLLPHFST…
32	32	chr5	8266832		-1			chr5_8266832_-1	chr5_8266832_-1_Aegilops_tauschii	CYP71C8_5D_Triticum_aestivum(wheat)	99.43	523		CYP71C8	MALEAAHHYLQLAVGHGTSTPAVLLIVVVPLLMLVLVSVRTSASTRKLRLPPSPPGSLPIIGHLHHIGAQTHISLQHLVDKYGHNGLLFLRAGAVPTVIVSSPSAAEAVMRTHDHILASRPWSMASHILRYNTTDVAFSPLGEYWQHTRKLVNTHLLSAKKVHSFRHGRQEEVCLVVNKIREAATNAPSTAVDMSEFLAAYTNDVVSRSVLGATHRKKGRNTLFREMTETNVDLLVGFNLENFIPRWPLTEVLFRLVCWKVQRHLNKWDALLEEVIKEHINLKQDNSADFIHVFLSLQQEYGLTDDNVKSLLMNIFEAAIETSYLVLEYAMAELINNRHVMKKLQTEVRTFASSKGKRLDMITEEDLSSLPYLKATMKEALRLHPPGPLLLPHYSTADC…
33	33	chr4	365194076		-1			chr4_365194076_-1	chr4_365194076_-1_Aegilops_tauschii	CYP71C9_U_Triticum_aestivum(wheat)	99.81	528		CYP71C9	MAHVHVDEMLHEAAPAAPRSLLIATAVLFSLVVVPLLLRIITKQGAASDAKLLSLLPSPPTRLPIIGHLHLMGDLPYVSLAGLAAKYGPELMLVHLGAVPTAVVSSPRTAEAVLRTHDHIFASRPRSMVFDIIMYGQTDSCFAPYGEHFRKARKLVTVHMLNARKIRSQRPAREEEVRLVIGKIAKAAAAREAVDMSELLHSYVNDLVCRAVSGKFSQEEGRNKLFRELTDINAALLGGFNILDYFPSLGRFELVCKVACAKARRVRKRWDLLLDKLIDDHAARMVSREDEAQPEQEEDKDFIDVSLSLQQEYGLTRHHIKAILIDMFEAGTDTSYMTLEFAMAELIRKPHLMKKLQEEVRRNVTNGQEMVAEDDLPNMTYLKAVIKETLRLHPPVPLM…
35	34	chr3	29261275		-1			chr3_29261275_-1	chr3_29261275_-1_Aegilops_tauschii	CYP71C10 Triticum aestivum	99.81	514		CYP71C10	MANLVQELMLETPPRAWFLFLLPLLLLSLHNWFTRKTGSTGQRLPPSPPALPIIGHLHLVGALPHVSLRDLARKHGPDVMLLRLGAVPTLVVSSPRAAEAVLRTHDHVLASRPPSVVSDVIMYGSSDIAFAPYGEYWRQARKLVTTHMLSVKKVQSFRSAAAEEVSMAMAKINEAATASGTVDMSELLNSFSNDMACRIVSGKFFLKDGRSKLFRELINDTSRLLGGFNLEEYFPALGRVGVLKRAVCAKAERVRNRWADLLDKVIDDRVSKRKSASDHKDGDFVDILLSVQQEYDLTREHMKALLTDVFFGATDTSANVLEFTLAELMRRPHFMRKLQDEVRSIIPRGQEIVNEADMNNMVYLRAVIKESLRLYPVAPLLAPHLAMADCTIHGYMVPA…
37	35	chr2	16108716		1			chr2_16108716_1	chr2_16108716_1_Aegilops_tauschii	CYP71C11_U_Triticum_aestivum(wheat)	99.81	537		CYP71C11	MSQVQHSLHELLLLLQARSPSPQAALVVSLLLFCPLLVLLVARRFGTPSTATVTARAREDQLSKLPSPPSRLPIIGHLHLVGPLPHVSLRDLAAEHGRDGLMLLRLGAVPTLIVSSPSAAQAVLRTHDHVFASRAYSPVTDILFYGSTDVAFCPYGEHWRQVKKIATTHLLTNKKVRSYRHARENEVRLVVAKIREAAAAGTAMDLSDLLNAFTNDVVCHAVSGKLFRKQGHNKLFRELVEANSSLIGGFNLEDYFPVLVKLDFIKRMVCAKAQKVNKMWDQLLNSLIDQHASRPASEQGGEDSDFIDVLLSIQQEYNLTRDHIKAQLEIMFEAGTDTSFIVLEYAMVRLMQKPHLMNKLKTEVRSTMSKGKEMITEDDLSSLAYLKAVIKETLRLHMP…
38	36	chr3	28935827		1			chr3_28935827_1	chr3_28935827_1_Aegilops_tauschii	CYP71C116_3D_Triticum_aestivum(wheat)	99.81	515		CYP71C116	MADLLQKLLPETLPPAWLFLFLLFLVVSVQYWFTGKLGAKRRQRLPPSPQALPIIGHLHLIGSLPHVSLRSLARKHGPDMMLLRLGAVPTLVVSSPRAAEAVLRTHDHVFASRPHSVVSDTIMYGSADIGFAPYGEYWRQARKLVTTHMLSVKKVQSFRGVAVEEVSMAMAKINQAAAADAVVDMSELLHTFANDMACRIVSGKFFLKDGQSKLFGELIKDTSRLLGGFNLEEYFPAVGRVGVLKKAVCAKAERVRNRWADLLDKVIDDRVSKRNSTSDHKDDDFVDIMLSVQQEYDLTREHMKALLTDVFFGSIDTSANTLEFTLVELMRKPHLMVKLQDEVRGIVPQGQEIISETNMNNMTYLRAVIKESLRLRPLAPLLAPHLAMADCIIDGYIVP…
41	37	chr1	90495262	90497031	1			chr1_90496567_1	chr1_90496567_1_Aegilops_tauschii	CYP71C139_1D_Triticum_aestivum(wheat)	99.62	529		CYP71C139	MARYVEVMYHIMHQTPLQLQALLLLSLIILLLHLATTSKQAKAKRLPPSPPALPIIGHLHLVGDLPHVSLRSLSRTHAADGLMLLHLGSVPNLVVSSPRAAQAVMRTNDHLFASRPPSRIADALLYGWSSDIAFSPYGEHWRQARRLVTTHLFTVKKVQSFRIARQQEVKVVISRIREAAAASVAVDLGEVVNTYANDVVCRAVSGKFFGAEGRNKMFRELIEANSALVGGFHMEDYFPRLAKVRLLSRFVRNNAETAHKRWDELLEAIIRDHEKNPMHHGRENGVDEQGESDFIDVLLSVRQEFHGITRDHIKAILMDLFGAGTDTSSLVLEFAMAELMRRPDQLMAKLQAEVRRGTPAGQQFVEEHNLAGMTYLKAVVKETLRLHPPAPLLLPHLAI…
43	38	chr1	15763232	15764862	1			chr1_15764434_1	chr1_15764434_1_Aegilops_tauschii	CYP71C140_1D_Triticum_aestivum(wheat)	99.2	503		CYP71C140	MDLGAIATPQSLWLVFLLFLIVVYLVTLSSRADKLYSKLPSPPFKLPLIGHLHLVGSLPHVALRDLARKHGPDVMLIRLGVVPTLVVSSPRAAKAVLRTYDHLFASRPHSPVGDILFSGSTNIAFAPYGDYWRQLRKIVTTHLLSARKVRANRAAREMELRLVLDRVKAATAASSAVDVSEVFSYFANDVICQAVLGRLPREAGRNKMFRELLEINSKLLGGFILTDFFPSLARLDLVSRKAVNQKKTWDDLLDDLIDKHASKMVTVEDEQDFIDVLLSVRQEYGLTNHNIKAILMDMFEAGTDTTYVSLDYAMAELMRNPRVMTKLQAEVRSCVTKGKEMVTEEDLASMSYLKAVMKEAMRLHPSGALLIPHLSVAECDVEGYTIPSGTRLMVNAWAL…
44	39	chr1	6010741	6014073	1			chr1_6013445_1	chr1_6013445_1_Aegilops_tauschii	CYP71C141_1B_Triticum_aestivum(wheat)	93.43	533		CYP71C141	MKDLVHHLLQGTSPREWFLLLFFLFVLVLVHYSLTRFAAKRADRQQVNRRLPPSPMALPIIGHLHLVGSIIPHVCLRDLARKHGPDLMLLRLGAVPTLIVSSPRAAEAVLRTHDHIFASRPHSVLADIMMYGMLDVGFAPYGEYWRQTRKLVTTHLLSVKKVQSFRSACEEEVSIAMAKINEAVATGSTVDMSELLSSFTNDIACRAISGKFFRKEGRNKLFQDLINDSTRLLGGFILEEYFPVLAKVSVLKWVVCAKAEKLKKRWADLLEKVIDDHNSKDSAMSDQKEGADFIDVLLSVQQEYDLTREHIIAMLTDIFFGATSTSSQTLEFTLVELVKRPHMMWKLQDEVRSNIIHRGEGAFTKVNHNSMIYLKAIIKESLRLHPVAPLLSPHLAMAD…
45	40	chr2	566221524		-1			chr2_566221524_1-	chr2_566221524_1-_Aegilops_tauschii	CYP71C142_2D_Triticum_aestivum(wheat)	99.44	534		CYP71C142	MAGEAAIHGAATSAHALLLLFLVPLVLLLVGAKRWNRRSKQRLNLPLPPSPPRALPVIGHLHLVGPLPHVSFRDLASKHGRDLMLLRLGAVDTVVVSSPRAAAAVLRTHDHALASRSCSAVADIIFYKRTDVAFAPYGEPWRQARKVVTTHMLSAKKVHSFRHDREEEARIAMAKIRDAAATAGPAAPVDMSELLGSYANDVVCRAVLGRNHRDDGRNKLLRELIDINMSLLGGFNVEDYFPSLAVADVFTGMVVCPRARRVRKRWDELLHKLIDEHGRQREQDDASADFIHVLLAQQEEYGLTTDNVKAILLDMFEAGTETTYLVLEFAMAELMNNPHVMAKLQAEVRRRRAPAAAVGKVDEGQSQQDVVTEEELGDMAYLRATVKETLRLHPPVPLL…
46	41	chr2	16376450		1			chr2_16376450_1	chr2_16376450_1_Aegilops_tauschii	CYP71C143_2D_Triticum_aestivum(wheat)	99.26	537		CYP71C143	MVHPLHGLHELLLLLQARSPHAALGLVFVLLVCPLLVLLVVRRLATPSTAAATARAREELLGRLPSPPSRLPIIGHLHLVGSLPHISLRDLAAKHGRDGLMLLRLGAVPTLVVSSPSAAEAVLRTHDHVFASRPYSAVTEILFYGPTDAAFSPYGEHWRQVKKIATTHLLTNKKVRSYRHVREHEVRLVVAKIRDAASKCTVIDLTDLLNAFTNDIVCEAVSGRLFRERGHKKLFRELVEANSLLLGGFNLEDYFPMLVKMDIIKRIVCAKAQKVNKMWDNLLNNIIDEHARKSVPEHNNEDIDFTDVLLSIQQEYKLTRDHIKAQLEIMFEAGTDTSFIVLEYAMVQLMRKPHLMNKLQAEVRSTITKGKEIVTEDDLDSLAYLKAVIKETLRLHMPG…
47	42	chr2	91475871		-1			chr2_91475871_-1	chr2_91475871_-1_Aegilops_tauschii	CYP71C147_2D_Triticum_aestivum(wheat)	100	447		CYP71C147	MLLRRGAVPHHVVSSPRAARAIMRTHDRMFASRPTSMVAHELLYGPIDVVFAPYGEHWRMARKLVATHLLSVKKIQSYRLARQQEVRLVMAVIRKSAAASTVIDMGEMMNNFVNDMVCRALSGKFIMKEGRNKIFRELIEANSALFASFNLENCFPRLAWLTRSNVCNKAKKVNRRWDDLLEKMIQDHEKRTLLPPHDRQDGKKEEESDFIDVLLLVRQQKDYDGITREQIKAFLMDMFAAGTDTSSFALEVAMAEIMCNPRVMTKLQAEVRNNTPKGQDMVEEENLANMTYLKAVVKETLRLHPPLPLLIPHLSMVASEVDVAGYTVPSGAWVTVNSWAINRDPEWWEKPEEFLPERFMEGGSASAVDFRGNDFQFLSFGDGRRICPGINFGLATIEI…
48	43	chr2	9889234		1			chr2_9889234_1	chr2_9889234_1_Aegilops_tauschii	CYP71C148_2B_Triticum_aestivum(wheat)	92.62	515		CYP71C148	MADLVMLETPPTGWFLFLFPLFLLFVFYYWFTWKTGKRQQLAGRLAPSPPALPIIGHLHLLGSLPHVSLCRLARKHGPDVMLLHLGAVPTLVVSSPRAAEAVLRTNDHVLASRPHSVVTDILMYGSSDVAFAPYGQGWRQARKLLTNHMLSVRKVQSFRSAVMEEVSMVMAKINEAAAVGSVVDMSELLKTFTYDMACRIVSGEFFLKEGRSKLFQDLTNDTSLLLGGFKVEEYFPTLSRVELLKRTVHAKAERLRRRWADLLDKVIVSHENKDKSALDNQGGNFVDILLSIQLENGLTREQMKALLTDVFFGSTDTSSNTLEFTMAELMRRPRLIGKLQDEVRSIVPQGQEIVSEADMNNMTYLRAVIKESLRLHPVAPLLAPHLAMADCSIDGYMIP…
49	44	chr2	9774367		1			chr2_9774367_1	chr2_9774367_1_Aegilops_tauschii	CYP71C149_2D_Triticum_aestivum(wheat)	98.24	511		CYP71C149	MLEMLPLLWFLFLFPLFLLFANYWFTVTCKTGRRQQHESRHQPSPPGLPIIGHLHLLGSLPHVSLRSLAKKHGPDVMFLHLGAVPTLVVSSPRAAKAVLRTHDHVFASRPRSMVSEILMYGSSDIAFAPYDEHWRQARKLVTTHMLSVKKVQSSRNAVTEEVNMVMTKINEAAAGGAVVDMSRLLKSFTYDMACRIVLGESFRKEGQSKLLRDLIDDTSRILGGFNLEEYFPTLARVGVLKRVVCAKAERVRRRWAYLLDKLIDERVSMEKSTVDNKDGDFIDILLSVQHEYGLTRERMKALLTDVFFGSTDTLYNTLEFTLAELMRKPCLLGKLQDEVRSIVPRGQESITETDINKMAYLRAVMKESLRVYPVAPILAPHLAMADCNIDGYMVAAGTH…
50	45	chr2	6264199		-1			chr2_6264199_-1	chr2_6264199_-1_Aegilops_tauschii	CYP71C153_2D_Triticum_aestivum	100	400		CYP71C153	MAWFLLLFPLSLLFVHYWFTGKTGKKQQQQQREDRLPLPPSPPSLPFIGHLHLIGALPHVSLRGLARRHGPDVMLLRLGVVPTFVVSSPRAAEAVLRTHDHVMASRPRSLVNDIIMYGASDVAFAPYGEYWRQARKLATTHMLSAKKVRSFRGTIMDEVSIVTAKISDAAAVGGTLNMSELLRSFAYDMACRIVSGESFLKERRSKLCQDLSHDTSRLLGGFNVEEYFPILTRVGLLKKAVCAKAERVRHRWADLLEELINDHLSKGKSTFDHKGGDFLDILLSAQEEYGLTRDHIKALLTDVFFGLTNTSSNTLEFTLAELMRRPCLMRKLQDEVRSIVPLGQETVSETDIDKMMYIRAVIKESLRLYPVAPFLPLHLAMGDCNIAGYMVPAGTHILV…
52	46	chr4	420415352		1			chr4_420415352_1	chr4_420415352_1_Aegilops_tauschii	CYP71C161_4D_Triticum_aestivum(wheat)	100	400		CYP71C161	MDLVSASATPQALGLLLLFFLVALHLAASSSGAEKLRSKLPSPPFKLPVIGHLHLVGSLPHVSLRDLARKHGPDVMLLRLGAVPTLVVSSPRAAKAVLRTHDHLFASRPHSAVGDILSNGSTNVALAPYGDYWRRTKKLVTTHLLAARKVRSNRAAREQEVRLVLARLRAAAADTARTAVDVSELFIYFANDVVCQAVLGRLPREAGRNQMFRELLEIHCKLLGGFNLPDYFPILARLDMVTAKAVKLKRRWDDVLDDLIDKHASKMANDDEEEDFIDVLLSVQQEYSLTRDNIKAILVDMFEAGTDTTYIALDYAMAELMRKPQAMAKLQAEVRGCATKGKEMVTEDDLGSMSYLKAAMREAMRLHPSGPLMIPHLSVADCGVEGHTIPSGTRVIINV…
53	47	chr5	531467721		1			chr5_531467721_1	chr5_531467721_1_Aegilops_tauschii	CYP71C162_5D_Triticum_aestivum(wheat)	99.45	542		CYP71C162	MVSVQRMRGDMAQVLVIFSPEVLLSLLLCFLVVRRYYLARRSANNCEQLHDHGRRLPPSPPKLPLIGHLHLVGPDPHISLAELSRKHAGRDGLMLLRFGQVPNLVVSSPSAAEAVLRTHDHVFASRPPSIVADVLLSGPSDVALAPYGEYWRQARKLVTTHLLSARKVRALQGGREEEVRLVVAKLRAAAAARSAVDMTELLGAFTNDVVCRAVSGKFFREEGRNELFRELIAANVAAIGGFNLEDYFPSLAKVGLLRRVVLARTCRLKKRWDELLDKIIDDHATKSPWLVGGVHHQHDEQDQDRDLVDILLSLQHEYNLTRDNVKVILMDMFAAGTDTSSIVLEFAMAELMRKSHLMAKLQAEVRSKTPKSQKTVKEDDLSGMPYLKAVVKETLRLHP…
54	48	chr5	534057887		-1			chr5_534057887_-1	chr5_534057887_-1_Aegilops_tauschii	CYP71C164_5D_Triticum_aestivum(wheat)	100	521		CYP71C164	MEDLVKKPMPETPPRALFLFLFFLFLLFVSWFTGKTRKMQHQQRENNHLPLPPSPPALPIIGHLHLVGSLPHVSLRSLARKYGPDMMLLRLGAARTLVVSSLRGAEAVLRTHDHILASRPSSVVSDILTYGSSDMAFAPYGEYWRQVRKLVTTHMLSVKKVQSFRSAAMEEVSLVMAKINEVATTDGTVDMRELLSLFANDMGCRIVSGKFFLKDGQSKLFRDLTNDTSRLLGGFNVEEYFPGLARVGVFKRAVCAQAERVRNRWADLLDKVIDDHVSKDKSTFDHEDGDFVDILLTFQHEYDLTREHMKAILIDVFAGATDTSANALEFTLAELMRKPRVMGKLQAEVRSNVPQGQEIVSEINVNNMAYLRAVIKESLRLYPIAPLLAPHLAMDDCNI…
55	49	chr6	108808607		1			chr6_108808607_1	chr6_108808607_1_Aegilops_tauschii	CYP71C166_6D_Triticum_aestivum(wheat)	98.86	527		CYP71C166	MAAQTVLPLLLSPQALLLYLLLIPVLLLLRATNRRSAGERAAADNHGGRPLPSPPNKLPLIGHLHLVGPDPHVSLAALAAKHGDGGLMLLRLGQTRALVVSSPRAAEAVLRTHDHVFASRPPNAFADALLDGGADVAFAPYGEFWRQARRLVTTHLLSARKVHSLRRGREEEARLVMAKIQGAAAAGALVDMTKLLGAFTNDIACRAVSGKFFREEGRNELFREAIDGNVAAFGGFNLLDYFPGLAKVGVLARLLFAKTSRLKRKWDELLDKIIDDHVSKASPQEQHHQHDQQEDEEADFVDVLLSLQEEYSLTRQHIKAILMDMFVAGTDTSYIVLECAMAELMRKPNLMAKLQAEVREKTPKGQQIVTEDDLGNMAYLKAVVKETLRLHPPAPLLLP…
57	50	chr6	9209102		1	frameshift near N-term, possible pseudogene		chr6_9209102_1	chr6_9209102_1_Aegilops_tauschii	CYP71C167_6D_Triticum_aestivum(wheat)	99.23	521		CYP71C167	MAQVLRSFHEHEVLVLIVCPLVLLLLILRFATSTQTTRRADKLLHRLPSPPYKLPLIGHLHLVGSLPHISLRSLAEKHGPDVMLLRLGAVPSLVVSSARAAMAVLRTHDHAFASRVQSAMTDILFYGSTDMAFSPYGDHWRQIRKIVATHLLSSKKVGSYRLAREKEVQHAMARIREAATRSAEVDLSKLLSSFTTDIVCHAVSGKSFRGGGRNELFRELVETSSMLIGGFNLEDYFPKLARLDVVRRMVCARAERIKKKWDDLLDEIINDHAKNTMLDHEIKQGGETDFIDVLLSIQQEYNLTRENVKAVLVDMFIGGTDTSFIVLDCAMAELIQNPEVLTKLQAEVRSVAEGKEMVKEEDLSGMIYLKGVIKETLRLHSPVPLFVPHLSMADCDIEG…
40	51	chr6	28910080		1			chr6_28910080_1	chr6_28910080_1_Aegilops_tauschii	CYP71C168_U_Triticum_aestivum(wheat)	98.29	526		CYP71C168	MAAQLVAALSSPQALSLYLLLVPLLLLYYSATTRTRRAIEQAAPAGHAEERPLPSPPTKLPLVGHLHLIGTDPHVSLAALTAQHGDGGLLLLHLGQVPNLVVTTPGAAEAVLRTHDHVFASRPQNAFADALLDGSDIAFAPYGEFWRQLRRLVTTHLLSARKVLSLRAGREEEARLAMAKIGDAAAAGAAVDVSTLLATFTNDIACRAVSGKFFREEGRNELFREVIDGNVAAFGGFNPQDYFPSLAKVDALARVLFPKMTRLRKRWDGLLDRIIDDHASKAASLQQEEDEEADFVDVLLARQHEYGLTRQHIKAILVDMFVAGTDTSYVVLEFAMAELMRKPHLMAKLQAEVRDKTPKGQPMVMEDDLGGMPYLKAVLKETLRLHPPLPLLLPHFSMD…
58	52	chr6	109630182		-1			chr6_109630182_-1	chr6_109630182_-1_Aegilops_tauschii	CYP71C170_6D_Triticum_aestivum(wheat)	97.19	499		CYP71C170	MAAQTPLLLSPQALLLYLLLIPVLLLLRATNRRSAGERAAADNHGGRPLPSPPNKLPLIGHLHLVGPDPHVSLAALAAKHGDGSLLLLRLGQTRALVVSSPRAAEAVLRTHDHVFASRPPNALADALLDGGADVAFAPYGEFWRQARRLVITHLLSARKVHSLRRGREEEARLVMAKIQGAAAAGAPVDMMRLLGSFTNDDVACRAVSGKFFREEGRNELFREAIDGNVAAFGGFKLLDYFPGLAKVGVLARLVFARTSRLKRKWDELLDRIIDDHVSKKASPQQHHAHDQQEDQEADFVDVLLSLQEEYSLTRQHTKSILMDMFVAGTDTSYIVLECAMAELMRKPNLMAKLQAEVRENTPKGQQIVTEDDLGNMAYLKAVVKETLRLHPPAPLLLPH…
59	53	chr7	634299398		-1			chr7_634299398_-1	chr7_634299398_-1_Aegilops_tauschii	CYP71C171_7D_Triticum_aestivum(wheat)	99.62	526		CYP71C171	MRRDMEKLVVFSPEVVLSLLLCFFVFVLSRYYVSRRPANNGRLPPSPPKLPLIGHLHLVGPNPHVSLADLASKHGGCDGLMLLHLGHVPNLVVSSPSGAEAVMRTHDHVFASRPLSAAAAVLLNGPSDISLAPYGEFWRQARKLVTTHLLSATKVRAFQGAREEEVGLVVAKIRAAAAAHSAVDMTHLLGTFTNDVVCRAVSGKFFREEGRNEVFRELIALNTAVTAGFNAVDYFPSLAKVPLLQRVLLAKTSRLKKRWDELLDKITEDHATRSASLPVQDEQDRDMVDVLLSLQHEYNLTTDNLRGILMDMFEAGTDTSYVTLEFAMAELIRKPRLMAKLRDEVRSKTPGTQQMVKADDLGGMYYLKAVVKETLRLHPPAPLLLPRLSMADCDDVNGY…
36	54	chr3	28930974		1	pseudogene		chr3_28930974_1	chr3_28930974_1_Aegilops_tauschii	CYP71C10_3B_Triticum_aestivum(wheat)	89.3	514		CYP71C183Pa	MANLV*ELMLETPPRAWFLFLTGSTGQRLPPSPPALPIIGHLHLVGALPHVSLRSLARKHGPDVMLLRLGAVPTLVVSSPCAAEEVLRTKDHVLASRPPSVVPDIIMYGSSDIAFAPYGEYWRQARKLVTTHMLSV*KVQSFRSAAMKEVSMAMAKINEAATAGSTVDMSELLNSFSNDMACRIVSGKFFLKDGRSKLFRELIRLLGGFNLEEYFPALGRVGVLKRVVCTKAERVRNRWADLLDKVIDDRVSKRKSASDHKDGDFVDILLSVQQEYNLTREHMKALLIDVFFGATDTSANVLEFTLAELMRRPHFMGKLQDEVRSIVPRGQEIVSETELNNMVYLRAVIKESLRLYPIAPLLAPHLAMADCTIDGYMVPAGTRVVVNAWAIGRDSSSWE…
34	55	chr3	28931059		1			chr3_28931059_1	chr3_28931059_1_Aegilops_tauschii	CYP71C10_3B_Triticum_aestivum(wheat)	89.3	514	identical pseuogene	CYP71C183Pb	MANLV*ELMLETPPRAWFLFLTGSTGQRLPPSPPALPIIGHLHLVGALPHVSLRSLARKHGPDVMLLRLGAVPTLVVSSPCAAEEVLRTKDHVLASRPPSVVPDIIMYGSSDIAFAPYGEYWRQARKLVTTHMLSV*KVQSFRSAAMKEVSMAMAKINEAATAGSTVDMSELLNSFSNDMACRIVSGKFFLKDGRSKLFRELIRLLGGFNLEEYFPALGRVGVLKRVVCTKAERVRNRWADLLDKVIDDRVSKRKSASDHKDGDFVDILLSVQQEYNLTREHMKALLIDVFFGATDTSANVLEFTLAELMRRPHFMGKLQDEVRSIVPRGQEIVSETELNNMVYLRAVIKESLRLYPIAPLLAPHLAMADCTIDGYMVPAGTRVVVNAWAIGRDSSSWE…
39	56	chr3	29247601		-1	pseudogene		chr3_29247601_-1	chr3_29247601_-1_Aegilops_tauschii	CYP71C160-3D_Triticum_aestivum	96	169		CYP71C184P	VRKPHLMVKLQDEVRGIVPQGQEIISETNMNNMTYLRAVIKESLRLHPLAPLLAPHLAMADCIIDGYIIPAGTRVVVNAWAIGSDPSSWEYAEEFVPKRFTDEGSSMHVNFKGNDFPFLPFGTGRRMCPGMNLGIANVELMLANLVCHFD*QLPLGVERKYIDMTEVFGLTVRRKEKLLLIPKSRM
42	57	chr1	15721926	15722212	-1	pseudogene		chr1_15722212_-1	chr1_15722212_-1_Aegilops_tauschii	CYP71C140_1D_Triticum_aestivum(wheat)	84.38	96		CYP71C185P	NAQEFVPERFMEGAMDAACDFKGNDFCYLLFGSGQKICPGITFAAVIFEIILANLIYHFNWELLEGSPGVDMTEEYGIDVHRTKKLLLIPRVAHGL
51	58	chr2	16252174		1			chr2_16252174_1	chr2_16252174_1_Aegilops_tauschii	CYP71C154_2B_Triticum_aestivum	93	521	90% to CYP71C144_2A_Triticum_aestivum	CYP71C186	MVHPLHALHELLLQARSPHAALGLVFVLLVCPLLVLLVVRRLATPSTAAVTTRAREELLSRLPSPSKRLPVIGHLHLVGSLPHISLRDLAAKHGRDGLMLLRLGAVPTLVVSSPSAAEAVLRTHDHVFASRPYSPVTEILFYGPSDVAFCPYGEHWRQVKKIATTHLLTNKKVRSYRHAREHEVRLVVAKIRDGASKCTTIDMSGLLNAFTNDIVCHAVSGKLFREQGHNKLFRELVEANSFLLGGFNLEDYFPMLVKLDIIKRIVCAKAQQVNKMWDNLLNNIINEHASKSAAEHNSEDNDFTDVLLSIQQEYKLTGDHIKAQLEIMFEAGTDTTFIVLEYAMVQLMQNPHLMKKLQAEVRSTIPKGKEMVTEDDLNSLAYLKAVIKETLRLHMPGPL…
56	59	chr6	9143174		-1			chr6_9143174_-1	chr6_9143174_-1_Aegilops_tauschii	CYP71C167_6A_Triticum_aestivum	96.76	524		CYP71C187	MAQVLHSPHEHASPQVLVFIVCPLVLLLIVRFATSTTTTRRADKLLDRLPSPPNKLPLIGHLHLVGSLPHISLRNLAEKHGPDVMLLRLGAIPSLVVSSARAAMAVLRTHDHVFASRVQSAMTDILYYGSTDMGFSPYGDYWRQIRKITATHLLSSKKVGSYRLARENEVQDAMARIRAAAARSTAVDLSKLLSSFTTDIVCHAVSGKSFRGGGRNELFRELVETSSKLIGGFNLEDYFPKLARLDVVRRMVCARAERIKKKWDDLLDEIINDHAKNTMLDHEINQDRETDFIDVLLSIQQEYNLTRENVKAVLVDMFIGGTDTSFIVLDCAMAELIQNPEVMTKLQAEVRSVAEGKEMVTEEDLNGMIYLKGVIKETLRLHSPVPLFLPHLSMADCDI…
60	60	chr7	46291386		-1			chr7_46291386_-1	chr7_46291386_-1_Aegilops_tauschii	CYP71E12 Triticum aestivum	100	517		CYP71E12	MAISLTSLLLSLPQQWPPVLLALVTVLSLLLLTRRKGLKLKLPPGPATVPLLGNLHQLGPLPHRALRDLARVHGPVMQLQLGKAPTVVLSSAQAAWEALKTHDLDCCTRPVSAGTRRLTYDLKNVAFAPYGAYWREVRKLLTVELLSAQRVKAAWYARHEQVEKLISTLNRAEGKPVALDEHILSLSDGIIGTVAFGNIYGGDKFSQNNNFQDALDDVMEMLSSSGSSAEDLFPIAVGRLVDRLTGFIARRERIFLQLDAFFEMVIEQHLDPNRVLPENGGDLIDVLIDLWKKPRGAFIFTKDHVKAIIFSTFVAGIDTNAATIVWAMSELVRKPRVLKKVQNSIRDVVGDNKSVQSDDISKLSYLRMVVKETLRLHPPGPLLLPRETMRHIQIGGYDV…
61	61	chr2	8697374		1	pseudogene		chr2_8697374_1	chr2_8697374_1_Aegilops_tauschii	CYP71E29_2A_Triticum_aestivum(wheat)	92	350		CYP71E29P	EKLVKNLTSIGTKPVLVPDYISATLDGIFGSFVFGGNRAAEKFKGQLVPVMNEAVDMLSSFSAEDFFANAAGCLFNHVTGIKARRQRIFKKLDGFFEQVIEHYVNEVPTRKKLDDNCGSALVEELIDLWKKRNKITKDHVKAILMDTFVAGNDTSARTINWAMAELIRHPRVLKKVQEEIRTEVGKKERVQYEDMSKLNYLRMVVKETLRLRIPAALLVPRETLWKIQIAGYEIPAKTRVIVNAWAIARDPNVWKDPEEFYPERFEDTDIDFNGAHFELLPFRAFARICPGMDVGVANVEFILANMLYCFNWELPPGMNIEDLSMEEEGALTIRKKTPLILVPTRYTAYQ
63	62	chr2	620586832		1			chr2_620586832_1	chr2_620586832_1_Aegilops_tauschii	CYP71E31_2D_Triticum_aestivum(wheat)	94	462		CYP71E31	MAISLSLELLSLSQQWQLLLALLPAISLVFLTRRLSRKRIRLPPGPAEAPILGNLHQLGQLPHRSLRDLAWRHRPVMQLQLGTVPTVVVSSAEAAREVMKTHDEDCCTRPVSPGMKRLSYGLNNVGFAPYGAYWQAMRKFLMVELFGVRHTKATWHARQHQVEKLMSTLSGLAGEAVALKEHIFRLADDIIGMLGFGDMYNSDKFPQHKNLEHVLEEATHAQASFSAEDYFPNIVGRLVDRITGLAARRERIFKQLDTFFEIIIEQHLDPRHVKPHNGDLVDRLIGLWKDKSGTLSITRDHVKGIIFGTFIGGSDTASVTILWAMAELIRKPRLLKKVQNEIRGVVGSNERVCQDDMAKLGYLKRVVKETLRLHPPATMLLPREAMRDIQIGGYDVPAK…
62	63	chr3	621386276		-1			chr3_621386276_-1	chr3_621386276_-1_Aegilops_tauschii	CYP71E32_3D_Triticum_aestivum(wheat)	98.62	508		CYP71E32	MAISLSSELLSQPQQWQLLLLLALVSLVLLMRRLSNKGLKLPPGPARAPILGNLHQLGQLPHRSLRDLARQHGPVMQLQLGTVRTVVVSSAEAAREVMKTHDKDCCTRPVSPGMKRLSYGLKNVGFAPYGTYWHVMRKFFVVELFGVRHVEAAWHARQHQVEKLMSTLSGLAGEPVALKEHILSLADGIIGMLGFGDMYNSDKFPHHKNLEHVLEEAIHVQASFSAEDYFPNIVGRLVDQITGLASRRERIFKQLDTFFEVIIEQHLDPQRVKPRNGDLVDRLIDLWKDNSGTLNITRDHVKGNIFGTFIGGSDTTTATILWAMAELTQNPRLLERVQDEIRAVVGGNERVRPDDLAKLVYLKMVVKETLRLHPPATMLLPREAMRDIQIGGHDVLAKT…
65	64	chr3	621749614		-1			chr3_621749614_-1	chr3_621749614_-1_Aegilops_tauschii	CYP71E34_3D_Triticum_aestivum(wheat)	97.46	511		CYP71E34	MAISLASELLSLPQQWQLILLPLLPILLALIFLTRRPSYKGLRLPPGPAQVPILGNLHQLGLLPHRSLRDLARRHGPVMQLQLGTVTTVVVSSAQAAREVMKTHDEDCCTRPVSPGMKRLSYGLNNVGFAPYGAYWHAMRKFLVVELFGARHVKAAWHARQHQVEKLMSTLSILAGEPVPLKEHIFSLADGIIGMLGFGDMYNSDKFPHHKNLEHVLEEATHAQASFSAEDYFPNIIGRLVDRITGLAARHERIFKQLDTFFEIIIEQHLDPRRVEPHNGDLVDRLIGLWKDNSGTLCITRDHVKGIIFGTFIGGSDTASVTILWAMAELIRKPPLLKKVQDEIRAVVGSNERVQPDDLAKLGYLKMVVKETLRLHPPATMLLPREAMRDIQIGGYDVP…
67	65	chr4	520582851		1			chr4_520582851_1	chr4_520582851_1_Aegilops_tauschii	CYP71E46_4D_Triticum_aestivum(wheat)	99.06	532		CYP71E46	MSPSLAIQLAPTLTMAVAGASPVLQLLLQQWPVILAILLVPLSFLLLRGRSRSGLKLPPGPMRLPFVGNLHQIGRLPHRSLAALARRHGPVMMLRLGMVPTVVLTSPEAAREALKTKDEDCSSRPLSAGPGLLSYGYKDVAFSPWSDYVREMRKLFIIELLSRRRVQAAYYARDAQIDKLVETLTVLGPNPVHLDALIFATMDRIVGLFAFGESYAGEQFKGQFVPLLNATMDMLGSFSAQDFFPNAVGRIIDRITGVKAHRERVFRQLDRFFEHIIEQCDGRKATGGSGSDLVQELLDIMKRPAASAAGTFTRDHVKAILMNTFIGSIDTTTVTITWAMAELIRNPRVLTRVQLEIRAAAGGGTRVHQADMPKMSYLRMVLSETLRLHPPATLLVPRE…
70	66	chr5	399781340		-1			chr5_399781340_-1	chr5_399781340_-1_Aegilops_tauschii	CYP71E50_5D_Triticum_aestivum(wheat)	99.64	560		CYP71E50	MLDQLVHGVHHAIASHFIHPRRPSTISSTSSVSELDKPPAGTMDFSLPQQWQLLLLASILLPVVSYLLVTKRSSEEGRLKLPPGPKRVPVLGNLHQLGPLPHRSLRDLARRHGPVMLLRLGAATTVVVSSSAAARDVLRAHDADCCSRPSSPGPARLSYGRKSVAFSPYGAYWRDMRSLFAAELLGARGVRAAWAARREQVDRLMAALGDAAGPVSLDEHVFRVADGVISTVAYGSVYGAEAFAGKHKRFQHVLEEAMDMSASFSAEDFFPNAVGRLLDRLAGIVARRERIFRDLDGFFEAVLEQHLHPARPKPESGGGDLVDALIRICEEHGFTRDHVKAVLLDAFLGGVDTSSVTILWAMSELIRKPQVLKKAQEEIRAAVAVNGNNEQRVQPDDLP…
72	67	chr5	399901387		-1			chr5_399901387_-1	chr5_399901387_-1_Aegilops_tauschii	CYP71E53_5D_Triticum_aestivum(wheat)	99.01	506		CYP71E53	MKPISFLISTLPIFGGCGPLVILSSNQKVLASHFINPRRPSTRSSTSSVSELAKPPAETMDISLPLLLVGILIPVVSYLLVTKRSAEEGRLKLPPGPKRVPVLGNLHQLGPLPHRNLRDLAGRHGPVMLLRLGAVTTVVVSSAAAARDVMKAHDADCCSRPASPGPARLSYGRKSVSFSPYGAYWRDMRGLFAAELLGARGVGAAWAARREQVDRLMAALGDAAGPVSLDEHVFRVADGVIATVAYGSVYGAEAFAGKYERFQHVLQEAVDMSASFSAEDFFPNAAGRLLDRLAGIVARRERIFRDLDGFFEEVLEQHLDPARRRPESGGGDLVGALVRICEEHGFTRDHVKAVLLDAFIGGVDTSSVTILWAMSELIRKPQVLKKAQEEIRAAVTGNE…
71	68	chr5	560020104		1			chr5_560020104_1	chr5_560020104_1_Aegilops_tauschii	CYP71E54_5D_Triticum_aestivum(wheat)	96.93	554		CYP71E54	MLSPSCTPCMHAIQVSTSKYSAIATPLYKPHTYGSTGQQHLHRSAMAISLLLLAGFLLALVSYLLVTRSGPEERGLRLPPGPARVPVLGNLHQLGPLPHRSLRDLEGRHGSVMLLRLGAARAVVVSSAAAARDVMRAHDADCCSRPASPGPARLSYGRKSVAFSPYGAYWRDMRRLFASELVGARGVAAAWAARRQQVDRLMSALGNATGPVALDEHVFRVADGIIGTVAYGSVYGAEAFARKYERFQHVLFEGMDMSASFSAEDFFPNAAGRLVDRLVGVVARRERIFRDLDGFFEEVLEHHQDPARPKPESGGGDLVDALVGLCEEHGFTTDHVKAVLVDAFLGGIDTSSVTILWAMSELMRKPRALKTAQEEIRAAVGVNGNGNRVQPDDLPKLTY…
73	69	chr7	46312206		1			chr7_46312206_1	chr7_46312206_1_Aegilops_tauschii	CYP71E57_7D_Triticum_aestivum(wheat)	97.88	518		CYP71E57	MATPLTSLLLSLPQQWQPVLLALFSILSLLLWRRSSSRKRLKLPPGPARVPLLGNLHQLGPMPHRTLRDLARVHGPVMQLQLGKAPTVVLSSAEAAWEALKAHDLDCCTRPVSAGTKRLTYDLKNVAFAPYGAYWREVRKLLTVELLSTRRVKAAWYARHEQVEKLMSTLSHAEAKPVALDEHILSLSDGIIGTVAFGNIYGSDKFSQNNSFQDALDDVMEMLSSSGSSAEDLLPGVVGRLVDHLTGFIARRERIFKQLDSFFETVIEHHLDPKRVLPENGGDLIDVLIDLWKKPRGTFRFTKDHVKAVIFSTFVAGIDTSAATIMWAMSELVRKPRVLKKVQDHIRALVGGNKRVKPEDMPKLSYLRMVVKETLRLHPAAPLLLPRETMRDIKIGGYD…
74	70	chr7	163429805		-1			chr7_163429805_-1	chr7_163429805_-1_Aegilops_tauschii	CYP71E58_7D_Triticum_aestivum(wheat)	100	521		CYP71E58	MPIPQIHWQLLPQVQLPQQWRQLLLGLGLLLPVLVLIVRRRKGFKLPPGPARLPVLGNLHQLGSLPHRSLRELARRHGPVMLLRLGATHMLVVSSASAAREVLKEHDADCCSRPACPGPKRLSYGFKNMAFAPYGEHWREMRKIFIVELLSMRRVKAAWGARQEQVDKLMAALAPDEPVALGEHIFAFTDGIIGTVALGNVYGADMLARKKHFQHVLDEAMDMLATFSAEDFFPNAAGRLVDRLTGLVARRDRLFSSLDDFFETVIEQHLDPARPKPENGGDLVDVLIDLWKQEHRGFTKDHVKAIIMDTFVGGIDTSSVTILWAMSELIRNPRVMKKAQEEIRAAVGEQRARVQPDDLPKLNYLKMVLKETLRLYPPATLLLPRETMRHVRIGGYDVP…
76	71	chr7	19161630		-1			chr7_19161630_-1	chr7_19161630_-1_Aegilops_tauschii	CYP71E60_7D_Triticum_aestivum(wheat)	96.72	518		CYP71E60	MGRASQLLELLPQQWQLLLFILPLISLLFLHRRWNMSGGLRLPPGPWKLPVVGNLHQIGPLPHRSLSTLARRHGPVMMLRLGTVPTVVLSSPEAAREALKTHDADCCSRPPAAGPRLLSYGYKDVAFSPYSDYVRDMRKLFIVELLSRRRVQAACYARDTQMGNLVKNLTNTGRKPVAVADHIFATLDGIIGSFAFGENYAAEQFKGQFVPVLNETMDMLSGFSAEDFFPNSVGRLVDKVTGIKSRRERIFKKIDAFFEQVIDQCINDDPRRRRQPGDECASVLVQELVDLWKNPAGATNSFTREHAKAILMNTFVGGNHTSSVTINWAMAELIRQPRILGKVQDEIRAIGGKTELLQHDDMPKLKYLKMVVKETLRLHPPATLLVPRETTGRIQVAGY…
64	72	chr3	621443787		1	missing N-term		chr3_621443787_1	chr3_621443787_1_Aegilops_tauschii	CYP71E33_3A_Triticum_aestivum(wheat)	94.93	276	cannot find the first exon	CYP71E62P	VIGRLVDQITGLAARRERIFKKLDTFFEIIIEQHLDPQRVKPQNGDLVDRLIGLWKDNSGTLSITRDHVKGIIFGTFIGGSDTASVTILWAMAELIRKPRLQKKVQDEIRSMVGGNESVQPDDLVKLAYLKMVVKETLRLHPPATMLLPREAMRDIQIGGYDVPAKTRIYVNAWAIGRDPTSWPDDPEEFKPERFETSEIDFKGAHFELTPFGARRRICPALSMSIATVEFTLANLLYCFDWALPKGAVVSMEEEGKLIPLLKTPLVLVPTPYRHM
66	73	chr3	621418910		1	pseudogene, missing PERF, stop codon		chr3_621418910_1	chr3_621418910_1_Aegilops_tauschii	CYP71E32_3D_Triticum_aestivum	95	431		CYP71E63P	MAISLSSELLSQPQQWQLLLLLALVSLVLLKRRLSNKGLKLPPGPARAPILGNLHQLGVLPHRSLRDLAWKHGPVMQLQLGTVRTVVVSSAEAAREVMKTHDKDCCTRPVSPGMKRLSYGLKNVGFAPYGTYWHVMRKFFVVELFGVRHVEAAWHARQHQVEKLMSTLSGFAGEPVALKEHILSLADGIIGMLAFGDMYNSDKFPHHKNLEHVLEEAIHMQASFSAEDYFPNIVGRLVDQITGLASRRERIFKQLDTLFEIIIEQHLDPQRVKPRNGDLVDRLIDLWKDNSSTLNITRDHLKGNIFGTFIGGSDTTSATILWVMAELTQNP*ILERVQDEIRAVVGGNERVRPDDLAKMFYLKMVVKETLRLHPPAPMLLPREAMRDIRIGGYDVLAKT…
68	74	chr1	8962235	8959647	-1			chr1_8960081_-1	chr1_8960081_-1_Aegilops_tauschii	CYP71E49_5B_Triticum_aestivum(wheat)	84.14	473		CYP71E64	MAVTLILLLALISAVSVLLLTRKSLKLPPGPAPVPVLGNLHQLGPLPHRTLRDLARLHGPVMQLWLGKAPAVVLSSPEAAWEMLRVHDLDCCTRPVSPGPKRLTYDLKNVAFAPYGAYWREIRKLLVVELVSARRVKAVWCAREQQVEKLISTLGCAGAKPVALDEHILSLSDGIIGTVAFGNIYGSDKFTQNKNFQHALDEATDVLSGSSAEDFLPKAVGRFIDHITGVVAQRERIFKHLDAFFDMVIEQHLDPNRAKSENSGDDLVDVLISHWKEHRGTLKFTRNHVKAIIFDTFIAGIDTSSITIMWAMSELIRSPRVLNKVQTEIRAVVDGKDRVRPEDMSKLKYLRMVVKETLRLHPPAPLLVPRETMRHIQISGYDIPAKTRIYVNAWAIGRD…
69	75	chr5	575121641		-1			chr5_575121641_-1	chr5_575121641_-1_Aegilops_tauschii	CYP71E49_5B_Triticum_aestivum(wheat)	94.02	502		CYP71E65	MLITHTTLLLSLIQQWELIFLALASVVSLLLLTRSRSRSSQKEMKLPPGPAPVPFLGNLHQLGRLPHRTLRDLARLHGPVMQLQLGKAPTVVLSSADAAWEGLKVHDLDCCTRPVSPGPKRLTYDLKNVAFAPFGSYWREIRKLLVVELLSGRRVKAAWYARQEQVEKLISTLSRAGGKPMALDEHILSLSDGIIGTVAFGNIYGSDKFTQNNNFQHALDEAAEVLSSSSAEDFFPKAIGWLIDRITGAFARRERIFKQLDAFFEMVIEQHLDPNRTKPENGGDLVDVLIAHWKEHRGTLKFTKDHVKALIFDTFIAGVDTSSVTILWAMSELMRSPRVLSKVQAEIRALVGGNDRVRSEDVSKLEYLKLVVKETLRLHPPAPLLVPRETMRHIQIGGY…
75	76	chr7	9220316		-1	frameshift near N-term, possible pseudogene		chr7_9220316_-1	chr7_9220316_-1_Aegilops_tauschii	CYP71E59_7D_Triticum_aestivum(wheat)	80.88	502		CYP71E66	MVLEEHMPHQWQWQLPTTTLFPVLPLLISIFLLVGAARRRRRGYHLLPILGNLHQMGDLPHRSLRELARRHGPVMMLRLGTVPTLVVSSADAARDVLKTHDADCCSRPDTPGPRRLSYQHKDVAFSPYSEFWRERRKLMVIEFLSKRRIRATWHAREAEVGKLVSGLALASVGRKPVRLEDHVFGYMDGIVGTVAFGNIYGTEHLAPYREHFHHVIDEAMAVRSSFSAEDYFPNALGRLVDRLTGVASLRERVFKEYDDFFEMMIEQHMDKPDNGCASGLIDVLIGFMKEEHHQGPFRFDRDVVKALLTNTFIGAVDTGAVTIIWAMAELVRNPHVLNKVQEEIRTVVGSNRERVQRDHVGKLKYLKMVVMETLCLHPALPLLLPRETGRHITVSGTVS…
79	77	chr1	11047752	11048375	-1	pseudogene, last exon only		chr1_11048201_-1	chr1_11048201_-1_Aegilops_tauschii	CYP71F19_1D_Triticum_aestivum(wheat)	100	208		CYP71F19P	DMFAGATETTSTTLAWAMSELGRSPEIMAKAQQEVWEVLGEGRSVITNSDIVKLHYIQMVIKETLRLHPPISLIPRSAREDCTVMGYDIPKGTNIYINAVAISQDPKYWDNPREFRPERFENINLNYNGTYFEFIPFGAGRRQCLGIQFGSSVMEMALTNFLYHFNWRLPDGSSLVSFDMSEKFGLAVSRRYDLQLRAIPHVWSKTSK
81	78	chr2	433590843	433592568	-1			chr2_433590843_-1	chr2_433590843_-1_Aegilops_tauschii	CYP71F20_2D_Triticum_aestivum(wheat)	99.41	508		CYP71F20	MEGWLTLCFIALSTLQALWFSGGKSKPKKHLHLPPGPWTLPIIGSLHHVILGTLPHRTITDLCRRHGPLTLLKLGEVPTVVVSSAEAVAEVMKTNDVAFSNRQTTQLQEIIGFGGKGIIFAPYGDHWRQMRKVCIVELLSSKQVKRMERVRAEEVGGLLRSIAAATAAGAAANLSEMFAALGNNVVARAAFGGKFARQEDFLRAMDQIMDLLGGFCLVDLFPSSRLVRRLSNGERRIKRIRDLIEHIITEILDERKVARAAGHGACSTDDEDLLDVLLRLQEEDSAYPLTTEIIVTVLLDMFAAASETTGTTLEWAMSELTSHPEVMAKAQLEVREVLGQERTIITNSDLAELHYMQMVIKEVLRLHPPAALLPRKTREDCKIMGYDILEDTNIYINVF…
82	79	chr2		11034633	-1			chr2_11033061_-1	chr2_11033061_-1_Aegilops_tauschii	CYP71F22_2D_Triticum_aestivum(wheat)	99.6	506		CYP71F22	MEWWLTLCLIALSTLLALWFSGCRSKSMKHLPPPGPWTLPVIGSLHHILSAFPHRALTDLGRRHGPVMLLKLGEVPLVVISSAEAVAQVFKANDVALSNHSSSRLQDIVGFGGKGILFAPYGEHWRQMRKVCITELLSTKQVKRMEGIRAEEVGNLIRSINTATAAGATVNVSEMVSVLSNDIVTRAVFGGKFARQEEYLHEIGKLMDLIGGFCLVDLFPSSWLVQWFSTAERRTKRSCDLIQSIIADIFEKRKAARASRHGAYSDDEEMLNVLLRLLEEDSLAYPLTTEIIVTVMFDMFGGATETTATTLVWAMSELIRHPNVLAKAHLEVREVLGEGRAIIGNSDLAELHYLRMVIKEVLRLHAPGPLIPRRTRENCNIMGYDVPKDTNVFINVFAT…
83	80	chr2		2539317	-1			chr2_2537849_-1	chr2_2537849_-1_Aegilops_tauschii	CYP71F24_2D_Triticum_aestivum(wheat)	100	507		CYP71F24	MEGWFGLCFIALCTPLALWLLKLAGSKYKPQKHHQLPPGPWTLPIIGSLHHVASALPHRRMMDMSRRHGPLMHLMLGEVPTVIVSSAEAAALVMRTNDPAFADRPQSVTSDIFGCSGKNIGFAPYGDHWRQMRKVCIVELLSSRQVKRIESIRAEEVGNLLRSIAALDGATVNVSEKMMELSNDIVTRAVFGGKFTQQEEYLRELDEAFALVSGFSPVDLFPSWRLVRWLSNDERRMRRCHGHIQRIIANVIEGRKAAGVGASSTDEEDLLDVLLRLQQEDSLEFPLTTEIIGAVLFDIFAGATSTIGTTLTWAMSELVRSPETMAKAQQEVREVLGQDRAVITNSDLAKPDYMQMIIKETLRFHPPASLVLRASIEDCTIMGYDIPKGTNVNINVFAI…
84	81	chr2	3092883	3094178	1			chr2_3094178_1	chr2_3094178_1_Aegilops_tauschii	CYP71F25_2D_Triticum_aestivum(wheat)	97.83	506		CYP71F25	MEGWLSLCFIALCTLMALWFRKLSCGNRKPRLPPGPWTLPIIGSLHQVASMLPHRRMMDLSRRYGPLMHLMLGEVPTVIVSSAEAAALVMKTNDLAFAGRPHSATLDIFGCGGRGIVFAPYGDPWRQMRKVCTMELLSSKQVRRMDGIRPEQVGNLLRYVAAAASTGAAVDVSEKVMALSNDVVSRAVFGGKFPQQEEYLRELDEAFVLLGGFCLVDLFPSSQLVRWLSNGERHMRRSYGHIQRINADVIEGRKAARAAAQDDASSTDDDDLLDVLLRLQEKDAFTFPMTTESIGAVLFDIFAGATQTTGVALEWAMAELVRHPETMAKAQLEIREVLGQGRAVFTNSDLAGLHYMRMIIKEVLRLHPPGPLIPRRAREDRKVMGFDMLEGTNVYINAF…
85	82	chr2		3091214	-1			chr2_3087395_-1	chr2_3087395_-1_Aegilops_tauschii	CYP71F26_2D_Triticum_aestivum(wheat)	99.21	508		CYP71F26	MEGWFSLCFVALGMPLALWLLKLAGGKNKPQKHQLPPGPWTLPIIGSLHHVVSLVPHRKITQLCRRYGPMMHLKLGEVDAVVVSSAEAVAQVMKTNDLTFATRPGTPTQDIAGCGGRGIIFAPYGDHWRQMRKVCIVELLSSMQVRRMESIRPEEVGNLLADIATAAAARNSINISEKMMELSNNVVSQAVFGGRFTQQDEYIHELDVVLTLLGGFCLVDLFPSSRLARWLSFGARRMKKSYGRMQRIIADVIEERKAARAAGDGASSTDDEDLLDVLLRLQNDDSLGFPLTTKSICAVLFDIFSGATDTTGTILEWAMSELVRHPETMFKAQLEIRKVLGQDRTIIKNSDLGNLHYMRMVIKEVLRLHLPAPLIPRMARMDCKIMRYELLKGTTILIN…
87	83	chr2		4032575	-1			chr2_4031104_-1	chr2_4031104_-1_Aegilops_tauschii	CYP71F30_2D_Triticum_aestivum(wheat)	99.6	506		CYP71F30	MEVLISLCLVALATVLVTWLLKLKASSSGRSKAKQELPPGPWTLPIIGSLHHVLSLLPHRTITKLSRRHGPLMLLKLGEVSTVIVSSAEGAALVMKTNDLALAGRPCSVTLDIAGRGGKGLLFAPYGDHWRQMRKLCVVELLSSKQVKRMEGIRAKEVGDLVRSITASAGATVNISEMVAALSNDVISQAVFGGKFPQQEEYLRELDEVFRLLGGFCLVDLFPSSPLSRWLSNGERHMKRSCARIHQIIAEIIKGRKESLNPGNGATDDEDLLDVLLRLQEEASLAFPLTTDTIGAVLFDMFAAGTESTSTVLEWTMSELVIHPEAMAKAQQEVRQVLGEKRAIITNRDLGELHYLRMVIKEVLRLHPPGPLVPRRAREDCKMMGYNILKGTNVYVNVF…
88	84	chr2	4023733		1			chr2_4025021_1	chr2_4025021_1_Aegilops_tauschii	CYP71F31_2D_Triticum_aestivum(wheat)	99.6	506		CYP71F31	MEGLSLCLVALATLLVTWLLKLAASSGSSSKAKKPQLLPPGPWTLPIIGSLHHVVSVLPHQRITELCRLYGPVMLLRLGEVPTVVVSSAEAAALVMKTNDLAFANRPRSVTQEIYSCGGQGIALAPYGEQWRQMRKVCVVELLSAKQVKRIEGIRAEEVSNLLQSISITASARAGGVNLSEKVSAFSNNIVSRGLFTERCARQDEYLGEIDKMASLMSGFSLVDLFPSSRLVRWLSNGERNMKRCCARMQGIISDIIDGRKAAPHRADTEDLLDVLLRLQAEDSLPFPLTTESIGVLIFDIFTAATESSATVLEWAMSEIFNHPNVMAKVQSEVRHVLGPGKAVITNNDIAELHYLRMVIKEVFRIHTPIPLPVPREAREDCKIMGYDIPKGTTIYVNA…
89	85	chr2	2413456		1			chr2_2414979_1	chr2_2414979_1_Aegilops_tauschii	CYP71F35_2D_Triticum_aestivum(wheat)	94.9	510		CYP71F35	MEMERWLSLYFIGISTVLALWFLIFFGSKRNPKKKQLPPGPWTLPIIGSLHHLVGDLPHRRMMKMSRQHGPLMHLRLGEVPTVIVSSAEAAALVMKTNDLDFASRPRSPLQDIISCGGMGIIFGPYGDRWRQMRKICIVELLSSKQVRRMEGIKANEVGNLLHSMATAGATVNVSAKMATLSSNVVTRAVFGGKFTRQDEYLHELSNVNELMGSFCLVDLFPSSRLVRLLSNCERLMRRSYGRIQHIITEIIEGRKAARAAGGHACSTNDEDLLDVLLRLQQEDSLTFPLTTEIIGVVIFDIFGAATETTGTAVDWAMSELLNNPEAMGKAQREVREVLGQGRHVIKSTDLSELRYMKMVIKEVLRLHPPAPLLVPRETREDSQIMGYNMSKGTNIFVN…
90	86	chr2	23021653	23024468	-1			chr2_23021653_-1	chr2_23021653_-1_Aegilops_tauschii	CYP71F38_2D_Triticum_aestivum(wheat)	93.63	518	one indel	CYP71F38	MTNILELPAMDAWPSVCFVALSTVLAIWLLKLSGSKSKSAKKNLPPGPWTLPIIGSLHHVTTALPHRTIMKLSRRHGPLMLLRLGEVPTVVVSSAEVMAEVTKANDLAFAGRPRSATNELFGSGGRDIALAPYGDHWRQMRKIGVMELLSSKQVKRMESIRVEEVGSLLRDITASNGATINLSEKAMALSNHVTTRAVFRGKFTQQGEYLRELDKAFTLLGGFCLHDLFPSSRLVRWLSNGEREMNKCHRRIHRIIANVVEERKASRAAHTGSSVAGHEDMLDVLLRLQHEDSLQFPLTTETMGAILFDVFAGGTETTGNVLIWAMAELMRSPNSMAKAQQEVREVLGEDRAVITNSDLVELQYMRMIIKEVLRLHPPNPLVPRMAREDCTVMGYDIPK…
91	87	chr2	3364468	3366638	1	N-term has adjacent duplication		chr2_3366183_1	chr2_3366183_1_Aegilops_tauschii	CYP71F39_2D_Triticum_aestivum(wheat)	99.4	500		CYP71F39	MEVTISSISFVSLALVLLLWFFHPKPNKHLRPPGPWTLPIIGSLHHVFGVLPHRIMAELSRRHGPLMFLRLGEVPTVVVSSAEMAEVVMKSKDLMFASRPRGVTLDVIGYGSGIGIIFAPYSDRWHQARKVCTMELLSAKQVKRMEGIRSEEVSNLLSSITTSIGTTINLTEKLSALMNDVIARAVFGGKCAQQGEYLRELEKVTALVGGFSLVDLFPSSRLVRLLSSGERRMRRSYGRIQCIISNIIEQRKEMRAAVSSNDEEDLLDVLLRLHKEDSLPYPLTLEAIGVIIFDLFAGGTKTSGITLEWAMSELLKNPENMRKVQLEVRQVVGGQQSVINNNDLHDLHYMRMVIKEVLRLHPPAPLLPRRAREDCEIMGYKIPEGTNVQVNIFVICQDC…
92	88		3364934	3365332		internal duplication, possible assembly error, small gap in front of this sequence, only 43 bp between the two exon 1s				CYP71F39_2D_Triticum_aestivum(wheat)			duplicate exon 1, adjacent to first exon	CYP71F39P	SFVSLALVLLLWFFHPKPNKHLRPPGPWTLPIIGSLHHVFGVLPHRIMAELSRRHGPLMFLRLGEVPTVVVSSAEMAEVVMKSKDLMFASRPRGVTLDVIGYGSGIGIIFAPYSDRWHQARKVCTMELLSTKQ
93	89	chr3	77137921		-1	missing N-term		chr3_77137921_-1	chr3_77137921_-1_Aegilops_tauschii	CYP71F44_U_Triticum_aestivum(wheat)	95.77	497		CYP71F44	MEAWLSLCFIALSAVLALWFLKPSSGESKPGKRLPPGPWTLPIIGSLHHVVSVLPHHTIAQLSRRYGPLMLLKLGELPTVVVSSAEAAALVMKTHDVAFANRKSSVTLDIAACGGNGIIFAPYGDRWRQMRKICVMELLSSKCVKRMEGVRAEEVGHLLRSIAASNGAVVNVSEKVSALSNSVASRAFFGGKLAQQDVYLREFHQVMELMGGFCLVDLFPSSRLVRWLSNGERRMKKSYGSIRRIIGDIIERRKAERLAGGACGAEDEGLLDALLRMQEEDSLASPLTTDAIGTVLFDILGAATETTGLVLAWTMSQLMNNPEAMSKAQLEVRRVLGQDKAVITNTHPLVELQYMQMVIKEVLRLHPPSPLVARAAREDCQIMGYDILKGTTVYVNVYA…
94	90	chr5	547556081		-1			chr5_547556081_-1	chr5_547556081_-1_Aegilops_tauschii	CYP71F45_5D_Triticum_aestivum(wheat)	100	514		CYP71F45	MHAIAMEVSSLCLVALATVIIFAWFLKKLTAWSTEKSKSKRPRLPPGPWTLPIIGSLHHLLGGLPHRRMMELSRLHGPLMFLRFGEVPNVVVSSAEAAELVMKTHDLTFATRPRSATIDVISGGGKGIALAPYGDHWRQMRKICIVELLSAKQVKRMESIRSQGVMKLLRSVADAAAASGSGIVNLSNLVAVLSNDITARAVFGGMCAQQGEYRRELGQIVKLIGGFCPADLFPSSRLVRWLSSGERSLRKSYGGMQRIIDNIIDGRKAERESHVGCSAEDEDLLSVLLRLREEDSLAFPLTSESIGAVITDIFGAGSESSSTTLVWAMSELMKNPEAMAKAQIEVRKVLGRGRVVIANADLGELHYLQMIIKEVLRLHPPATLLVPREARNNCEIMGY…
95	91	chr5	448850090		-1	last exon only		chr5_448850090_-1	chr5_448850090_-1_Aegilops_tauschii	CYP71F47_5D_Triticum_aestivum(wheat)	100	210	cannot find the first exon	CYP71F47	DVFAGATETIGSVLSWAMSELMHNPDTMAKTQREIREVLGEDRAVITNSDLAELHYMRMIIKEVLRLHPPGPLVHRMSREDCTIMGYDIPKGTDVYINIFAISRDPRHWNKPEEFRPERFDNNNVNYKGAYFEFIPFGSGRRQCPGIHFSSSVTEMVLTNFLYHFDWMLPDGHNLASLDMSEKFGLAVTKSHDLKLRAIPHMLSKAMSSK
100	92	chr5	522895949		1	pseudogene fragment aa 250-290		chr5_522895949_1	chr5_522895949_1_Aegilops_tauschii	CYP71F48_5D_Triticum_aestivum(wheat)	96.35	384		CYP71F48P	MEIFLSLCLVTVATVLVLWFLSSSDDKTKTKKRLPPGPWTLPIIGSLHHLVGQLPHRALAELSRRHGPLMYLKFGEVPTVVVSSAEAAALVMKTNDPTFADRGSGVALDIAGCGGKGIMLAPYSDRWRQMRKVCIVELLSAAQVRRMASIRVEEVAGLVRSLAASPAGSTVNLSEKLPVLANDIVARAAFGGKCAHQGEYLRELDDVMTLLGGFILADLFPSSKLVRWLGTGERRLRRSCGRIQRIIGNIIDDRRARRAADGPRSTDDEDLLDVLLRLQEEDSLTFPLTAEIIGVVIFDMFAAASETT*TTLEWAMSELLNNPKVMAKAQQEVQEVLGPERAAITNSGLGALHYLRMVIMETLRLHPAGVIILRGAREDCEILGYAIPKGTKVHINVFT…
96	93	chr7	265299451		1			chr7_265299451_1	chr7_265299451_1_Aegilops_tauschii	CYP71F50_7D_Triticum_aestivum(wheat)	99.61	511		CYP71F50	MEGWLSLCFIAGSTLLAIWFLELSRRNPNKKLPPGPWTLPIVGSLLHVVGAFPHRTIAELSRRHGPLMHLRLGEVATMVVSSAEVAALVLKTNDLTFADRPRTVTQNIFGSGGKDIAFAPYGAAWRQMRKVCVMEILGSKQARRMERIRTEEVGSLLRSIVSASAVGGAGATVNVSEKVAMLSNDVVSRAVFGGKVAQRDEYIRELGEAMELVTGFCLVDIFPSSRLVRWLSSVERRMRRSYGRMQSIIADILDERKAARAAGDGSCSTDDEDLLEVLLRLQAEDSLEFPLTTEIIGAVMFDMFAGGTDTTATVLEWAMSELVNNPEAMTKAQLEVREVLGEDRVIITNCDIAKLPYMRMVIKEVLRLHPPIPLVPRMARDDCTIMGYDMLKGTNVLVN…
97	94	chr7	597064255		1			chr7_597064255_1	chr7_597064255_1_Aegilops_tauschii	CYP71F51_7D_Triticum_aestivum(wheat)	100	508		CYP71F51	MAGWLSLCLISLSTVLALLFLKLSSRKNKSKKKLPPGPWTLPIIGSLHRVVSALPHRTMTELSRRHGPLMFLRLGEVPTVVVSNAEAAALVMKTNDRAFASRPCSATQDIFGCGGKGIAFAPYSDHWRQMRKICVTELLNSKQVRRMEGVRAEEAGNLVRSITASAGATVNVSEKVRALSNDVVCRAVFGGKFARQDEYLRELDEAFALVGGFCLVDLFPSSRLVRWLSNGERRMRTSYGRIQRIIAGIIDERKDTRAAGVAGGSTDDEDLLDVLLRLQLEDSLEFPLTKEIMGAVLFDMFAAATHTTSTVLEWAMSELMNNPGAMAKAQLEVREVVGQHGAVITNNVLGDLHYMQMVIKEVLRLHPPGPLVPRMTREDCTIMGYDMFKGTNVYVNVFA…
98	95	chr5	573970586		1			chr5_573970586_1	chr5_573970586_1_Aegilops_tauschii	CYP71F52_U_Triticum_aestivum	99	508		CYP71F52	MEGWFSWCFIGVSTILALWFLKFLGGKSNPKKKQLPPGPWTLPIIGSLHHVVSVLPHRRMSKMSRRHGPLMHLRLGEVPAVIVSSAEAAAQVMKTNDLAFASRPQGPLQDIVGCGGRGIVFGSYGDRWRQMRKICVVELLSSKQVRRMEGIKANEVENLLRSITAAGATVNVSTKMAALSNDIVARTVFGGKFTQQDEYLSELDKVIKLIGGFCLVDLFPSSRLVRWLSNGERHMRRSYGRIQHIISNIIEGRKAARTTDRHACSTDHEDLLGVLLRLQEENSLSFPLTTEIIGVVIFDIFGAATETTATTLEWAMSELLNNPEAMAKAQLEVREMLGQDRHVIKSTDLSELRYMRMVIKEVFRLHPPVPLLIPRETREDCKIMGYDMPKGTNIFVNVF…
99	96	chr5	533397122		-1			chr5_533397122_-1	chr5_533397122_-1_Aegilops_tauschii	CYP71F53_U_Triticum_aestivum(wheat)	99.8	503		CYP71F53	MEGWLTLCFIAVSTLLAVWFSGGKSKPKKHLPPGPWTLPVIGSLHHVLSVLPHRTITELCRRHGPLMLLKLGEVPTVVVSSAEAVEQVMKTNDIAFSYRRTTELQDIVGFGGKGIIFAPYDNRWRQMRKVCIMELLNSKQVKRMEDIRAEEVGRLLRSIITATAVGATVNISQKAAALSNAVVTRAVFGGKFARQEEYLREINQLLELLGGFCLVDLFPSSRLVRWFSTCERRTKKSCDLIQHIITGVLDERKVVRAAGDGACSTDDEDLLDVLLRLQEEDSLAYPLTTENITTVLFDIFAAGTDTTGTALEWAMSELICHPEAMAKAQLEVREVLGHGRAIIGNSDLAKLHYLRMVIKEVLRLHPPGALLPRKTREDCKIMGYDMLKDTNIYINVFAI…
77	97	chr2	2655822	2655927	-1	frameshift after LRVD, possible pseudogene		chr2_2653266_-1	chr2_2653266_-1_Aegilops_tauschii	CYP71F1 Triticum aestivum	74.41	512		CYP71F58	MEWLSFSFVALSTLLAIWLLQFSGGKDKPAKKKLPPGPWTLPIIGSLHHVVSILPHRTMMQLSRRHGPLMLLRLGEVPVVVVSGAEVATLVMKTNDLTFASRPRSVTLDIFGCGGKDIAFAPYGNHWRQMRKICVMELLSSAQVKRMESVRAEEVGSLLRDVTSWASSGATINVSQKVMALSNDVVTRAVFGGKFAQQGEYIRELQEVFRLLGGFCLVDLFPSSRLVRWLSSGERHMKTSYGCIQRIIADVIEERKGTRASDAGSSTAGEEDMLEVLLRLQQEDSLKFPLTTETMAAVLFDIFAGGTETTANILSWAMSELMHSPNTMAKAQQEVREALGKDRAIITNSDHVELHYVWMVIMEVLRLHPPGPLVPRMAREECTVMGYDIPKGTSVYINV…
78	98	chr2	28470416	28472311	-1	possible pseudogene		chr2_28470416_-1	chr2_28470416_-1_Aegilops_tauschii	CYP71F36_2D_Triticum_aestivum	89	359	same seq with one indel	CYP71F36	MGVWLTLFFISLATSLALWFLKLFTKPAKKRLPPGPWTLPIIGSLHHVVSRLPHRTMMELSRRHGPLMLLRLGEVDTLVVSSAEVAELVMKTNDLVFADRPHSATHDIIGCGGKNIFFSPSGKYLHQMRKICTMELLSSRQVKRIEGIGNVDNLLCYITNAASTGSTVNVSKILMALTNNIVTRAVFGGKFTQQGKYLHELDKVLTVLGGFCLVDLFPSSRLVWCLSNGNRQIKKAYGRIQHIICKVIEGRMAARAAGDGVTRTDEEDLLDVLLRLQQDDSLEFPLTTENIGAVLFDIFAGGTETKGGVLAWAMSELVHAPESMIKAQQEVRDVLGEDRAVITNSDFAELHYMRMVIKETLRLHPPGPLVPRATREDCTILGYDIPKGTNVYINVFAIS…
80	99	chr2	2681435		-1	missing the N-term, not upstream, possible pseudogene		chr2_2681435_-1	chr2_2681435_-1_Aegilops_tauschii	CYP71F24_2A_Triticum_aestivum(wheat)	74.79	472	N-term not found	CYP71F59P	SLHHVASVLPHRRMDMSRRHGPLMHLQLGEVPTMVVSSAEAAALVMKTNDLSFAGRPRTVTTDIFGCAGKDIGFAPYGDHWRQMRKVCIVELLSSKQVKRMEGIRAEEVGNLMRSIAAAASTGATINLSQKVAALSNDVVTRAVFGGKFAQQGEYLRELGEAFRLMSGFCPVDLFPSSRLVRWLSNGERDAKRSHGRIERIIIDVMEGRKAERAASVGTDGEDLLDVLLRLQQQDSLEFPLTTDIIGAVLFDIFAGATENTATVLAWAMWELVRSPETMAKAQQEVRDVLVEDLAVFTDRDLTKLQYMQMIINETFRLHPPAALVPRMCREDCTIMGYDIPKGTNVFINVFAIAQDPACWDNPGEFKPDRFENNVNYNGTYFEFIPFGAGRRQCPGIQF…
86	100	chr2	2046058		-1	pseudogene		chr2_2046058_-1	chr2_2046058_-1_Aegilops_tauschii	CYP71F29_2B_Triticum_aestivum(wheat)	85.99	207		CYP71F60P	DVLSAATETTGNVLEWAMSELVRHPKIMSKAQREIRKVLGQDRAIVDNNDLHELHYMRTVIKEVLRLHPPVPLLPRSAIEDCKIMDCDMVKGTNVYINVYAVSRDPRYWKNPEEFKPERFEENNMDYNGTYTEYTPFGAGRRQCPGILFGTSTLNITLANLLYHFDWILPDGVSLSSLDMSEKFGITVGRRYDLQLRAIPHV*FKAT
102	101	chr1	342675801	342677481	1			chr1_342676984_1	chr1_342676984_1_Aegilops_tauschii	CYP71K38_1D_Triticum_aestivum(wheat)	99.62	522		CYP71K38	MAELAPLSMLFLALLVVVPVLYFIRSSRRHEEGSSRPRPPPSPWALPVIGHLHHVAGALPHRAMLGLSRRHGPLMLLRLCELRVVVASSADAAREIMKTQDLAFASRPMTPTGTALLGDSPGIVFAPYGDAWRQLRKICTLELFTSRRVRSFRPVREEEVGRLLRSVAVAAPSSAVNLSERISAYVADSAVRAVIGSRFKDRGAFLRMLERRMKLAPAQCLPDLFPSSRLAMLVSRMPREMKRERREMRDFIDAIIQEHQENSPAGAGADDDDFLDVLLRIQGEGKLDPPLTNDDIKAVIVDIFIASSETSATALQWAMAELMRNPRVMRKAQEEVRRALDGRDRVTEESLASLRYLDLVIKEVLRLHPPATMLLPRECRAPCRILGFDVPAGAMVLVN…
104	102	chr2	564729303		1			chr2_564729303_1	chr2_564729303_1_Aegilops_tauschii	CYP71K39_2D_Triticum_aestivum(wheat)	99.43	522		CYP71K39	MPVDLGVGATTKGMASLQLYQLLLPLLAIVVSLICLSRAAQRRRRREGARLLPPSPWALPVIGHLHHLAGDLPHRAMRDLARRHGPLLLLRLGGLPVVVASSADAAREVMVARDVDFATRPISRMLRLSIPDGTEGIAFAPYGDKLRQIRKICSVELFSARRVQSFRTVREEEAGRLLLAVAAAATASDPVNLSNRLSAYAADSSVRAIIGSRFKDRDTFLMILQRGIKLFAGMSLPDLYPSSRLAMLVSRVPGQMKRYREERDAFMDAAVREHQENRAADDDKEGLLDVLLRIQREGQLQFPMSIDNIKSAVGDLFAGGSDTSATTLEWTMAELVKNPKVMGKAQDEVRRALAGQPKVTEDSLGGLNYMRLVIKEVLRLHPPAPLLLPRECMNDCRVL…
105	103	chr2	564885932		1			chr2_564885932_1	chr2_564885932_1_Aegilops_tauschii	CYP71K40_2D_Triticum_aestivum(wheat)	99.8	512		CYP71K40	MESLQLYQYQLLLTLLAIVVPLLCLNRAVRRHRRRHREGARLLPPSPWALPVIGHLHHLVGDLPHRAMRDLARRHGPLLLLRLGGLPVVVASSADAAREVMVARDVDFATRPISRMIRLCIPEGAEGIVFAPYGDKWRQIRKICTVELLSARRVQSFRPVREEEAGRLLLAVAAAAASSTPVNLSQRLSAYAADSAVRAIIGSRFKDRDKFLVMLERGIRLFARMSLPDLYPSSRLAMLVSRMPGRMKRHQEEGAAFMDAVVQEHQENRAADDDKEDLLDVLLRIQREGHLQFPMSTDNIKSAVGDMFAGGSDTSATTLIWTMAELLKNPRVMRKAQDEVRRALAGQPNVTEDSLGGLNYMRLVIKEVLRLHPPAPLLLPRECMNDCRVLGFDVPKGTM…
108	104	chr3	51511903	51513153	-1			chr3_51511903_-1	chr3_51511903_-1_Aegilops_tauschii	CYP71K43_3A_Triticum_aestivum(wheat)	94.97	517	94% to chr3_51666016	CYP71K43	MAAESPAYYSLLLPLFLVVVPALYLAGVFRSRRRSAGRQRFPPGPWALPVIGHLHHLAGSSVPPHHAMRDLARRHGPLMLLRFCQLPVLVVSSPDAAREIMKTHDVAFASRPLSPTIQLFLRGSEGLVFAPYGDGWRQLRKICTLELLSNRRVHSFRAVRAEVLGRLLRSVASSASAPAPAPVNLTRGLASFVADSSVQAMVGRLRSDDRDTLFTLLREGLKIVPGMTLPDLFPSSRLAMLLSRVPARIDHRNKRMAAFMDSVIRQHRDKKRSAACADGDAEDLLDVLLRLQDDMDSQYPFTTDNIKLVIIDLISASSETTSTTLVWAMAELLRKPAAMRRAQDEVRRQLDGHRRVTEDGLTDLHYLRLVIKETLRLHPPVMLKRECGGPRQQLLGFDV…
110	105	chr5	415805376	415806571	-1			chr5_415805376_-1	chr5_415805376_-1_Aegilops_tauschii	CYP71K45_5A_Triticum_aestivum(wheat)	95.87	484		CYP71K45	MDAYLQLHLFLVLLVAILVLFLRPRCSAAGDPSARRHPPGPWALPIIGHLHHLAGTVPHRALSSLARRYGPLMKLRLGELVVVVASSSDAAREIMKVHDANFASRPLTSMQRLAFQGNEGLVFAPYGDGWRQLRKICTNELLSSRSVQSFRHVREEELGCLLRSVEEASASGSPVNLTKGISAYLADSTVRAVIGSRFRQRDRYLRVLQDLLRIVPGMTLPDLFPSWRLVLLLSSVPGRIRRHSEDMKQMMDSIIRERQEDRAAGQAKEKDFLDVLLRLQAEVDSQYPLTTENIKTVLLDMFGAGSETSATTLEWAMAELLRNPAIMGKVQDQVRQAAALADRSTVTEADLPNLHYLRLVIKETLRLHPPVPLLLPRECEKPCQVLGFDVPRGAMVIVN…
111	106	chr6	167452835	167454014	-1			chr6_167452835_-1	chr6_167452835_-1_Aegilops_tauschii	CYP71K46_6D_Triticum_aestivum	99	511		CYP71K46	MAAVLSICLLLVLLLAIPLILFKSRRPAPRRGPGGRAARLPPGPWALPVIGHLHHLAGALPHRALCDLARRHGPLMMLRLGELDAVVASSPDAAREIMKTHDASFASRPLTSMQQMAYGDAEGLIFAPYGDAWRQLRKICTVEILSSRRVQSFRPAREEELGRLLRSVAAASASSSPVNLSERISAYVADSTVRAIVGGRFKQRDTYLKMLQEGLKIVPGMTLPDIFPSSRLVRLFSSVPGRMQRHSQGMKLFMDTIIQEHQENSGPDCDGDKEEDLLDVLLRLQKEGDSQYPLTTDNIKTVMLDMFGAGSETSATTLQWAMAELIRNPRVMRKAQDEVRQQLAGHGKVREADLTDLRYLGFVIKETLRMHPPAPLLLPRRCGSPCQVLGLDVPEGVMV…
113	107	chr6	167348843	167350071	-1			chr6_167348843_-1	chr6_167348843_-1_Aegilops_tauschii	CYP71K47_6D_Triticum_aestivum(wheat)	99.81	518		CYP71K47	MDADVPLHLLLLVPLLAIIPLILFASRRLTPPESSGVARLPPGPWALPVIGHLHHLAGAIPHQALRDLAWRHGPLMLLRFGEVTAVVASSPDAAREILKTHDPAFASRPVGPMSRLWFQGSEGLVFAPFGDAWRQLRKICTQELLSARRVHSFRPVRQDELGRLLRAVASSSPSPPERRSVNLTEIIAAYIADSTVRAIIGSRPFKGRDACLKLFEDMFRMRPGLSLPDLFPSSRLAMLVSREPGRIKRCRREMLQIMDAVIQEHRERKAAGEGEAEGEDLVDVLLGLQEEVGSQHPLTTENIKFVMIDMFAAGSETATTALQWVMAELMRNPRVRHKAQEEVRRAMAGHCRVTEDGLGNLHYLHMVVKESLRLHVPGPLLTLRQCRSPCQVLGYDVPA…
114	108	chr7	617877992	617879280	-1			chr7_617877992_-1	chr7_617877992_-1_Aegilops_tauschii	CYP71K50_7D_Triticum_aestivum(wheat)	100	510		CYP71K50	MAMAELIEPVVFPPLYPLLLPLLVIVPLLYLVRSSPRQNRGTQRRLPPSPWALPVIGHLHHLAGALPHRAMRDLSRRHGPLMLLRLCELRIVVASSAGAAREMLRTHDLAFAGRPMTPTGRVLLGDSLGVIAAPYGRAWRQLRVICTLELLTARRVRSFAPVRAEEVGRLLRSLAPEPGSAPAAVNLSERIAACVADSAVRAIVGSRFANRGAFLRLLERRMKLVPAKCLPDLFPSSRLAMLVSSMPRRIRRERREMMEFVDAIVREHQQNRVAAGDDEDLLDVLLRVQSEGELDPPLTDDDVKTVIIDMFMAGSETSATLLQWAMAELVKNPGAMRKAQEEVRREVSGRVTEDVLGSLGYLGLVIKETLRLHPPATLILRECRAACRVLGFDVPAGAM…
115	109	chr7	617962565		-1	pseudogene		chr7_617962565_-1	chr7_617962565_-1_Aegilops_tauschii	CYP71K51_7A_Triticum_aestivum	91	152		CYP71K51-fragment	VTEDSLPDLNYPRLVVKETLRLHPPAPLLLPRECRSDGCRVLGYDVPKGTMVLVNAWAISRDPIYWEAVEEFVPERFECGEAADFKGADMEYTPFGAGRRMCPEMAFGLANVELALAGLLYHFDWELPGGAEGGELDMAEDMGVTVRRRNDLVLVPVARVPVPPN
106	110	chr2	564844381		1	pseudogene		chr2_564844381_1	chr2_564844381_1_Aegilops_tauschii	CYP71K39_2D_Triticum_aestivum(wheat)	87.79	131		CYP71K57P	RLHPPAPLLLPRECMNDCRVLGFDVPKGTMVLVNAWAXXXXXXHWDATEDFNLERFERGEIDFKGAYMEYTLFGAGRRMCPGMSFGLANVELALAGLLYHFDWELPGGAEAVKLDVTEKMGVTVRLRRDLLLVLVVRAPLPLD
101	111	chr2	564779432		1			chr2_564779432_1	chr2_564779432_1_Aegilops_tauschii	CYP71K40_2D_Triticum_aestivum(wheat)	95.97	512		CYP71K58	MESLQLYQLLLPLLAIVVPLLCLNRAVRRRRHHEGAHLLPPSLWALPVIGHLHHLVGDLPHRAMRDLARRHGPLLLLRLGGLPVVVASSADAAREVMVARDVDFATRPISRMIRLCIPEGAEGIVFAPYGDKWRQIRKICTVKLLSARRVQSFRPVREEEAGRLLQAVAAAAASSTPVNLSQRLSAYAADSAVRAIIGSRFKDRDKFLVMLERGIRLFARMSLPDLYPSSRLAMLVSRMPGRMKRHQEDGAAFMDAVVQEHQENRAADDDKEDLLDVLLRIQREGHLQFPMSIDNIKSAVGDMFAGGSDTSATTPIWTMAELFKNPRVMRKAQDEVRRALAGQPNVTEDSLGGLNYMRLVIKEVLRLHPPAPPLLPRECMNDCRVLGFDVPKGTMVLVN…
103	112	chr2	564866569		1	pseudogene		chr2_564866569_1	chr2_564866569_1_Aegilops_tauschii	CYP71K40_2D_Triticum_aestivum(wheat)	88.7	115		CYP71K59P	KTTTVLVNAWAISRDPAHWDAAEEFIPERFEHGEIDFKGADMEYTPFGAGRRMCPGMSIGLANVELALAGLYHFNWELPGGVEARELDMTEKMGVTVRLRRELLLVPVFRAPLP
107	113	chr2	6262624		1	pseudogene		chr2_6262624_1	chr2_6262624_1_Aegilops_tauschii	CYP71K42_2B_Triticum_aestivum(wheat)	86.55	119		CYP71K60P	VLGFDVPVGATMLVSAWAIGRDPMHWDKAEEFMPERFDLNTIDFKRADFEYIPFGAGRTMCAGMTFGLANMELALASLLYHFEWELPHGMAAVDPDMIEVVTVTSRRKHDLLVVPVVRV
109	114	chr3	51664765		1			chr3_51666016_1	chr3_51666016_1_Aegilops_tauschii	CYP71K43_3A_Triticum_aestivum(wheat)	94.38	516		CYP71K61	MAAESPAYYSLLLPLLLVVVPALYLVGVFRSRRRSAGRQRFPPGPWALPVIGHLHHLAGSSVPPHHAMRDLARRHGPLMLLRFCQLPVLVASSPDAAREIMKTHDVAFASRPLSPTMQLFLRGSEGLVFAPYGDGWRQLRKICTLELLSNRRVHSFRAVRAEVLGRLLRSVASSASASASVNLTRGLASFVADSSVQAMIGRLRSDDRDTLFTLLREGFKIVPGMTLPDLFPSSRLAMLLSRVPARIDHRNKRMAAFMDSVIQQHRDKKRSAACADGGEEQAEDLLDVLLRLQDDMGSQYPLTTENIKLVIIDMISASSETTSTTLVWAMAELLRKPAAMRKAQDEVRRQLDGHSRVTEDGLADLHYLRLVIKETLRLHPPVMLIRECGPRQQVLGFDV…
111.1	115	chr4	6647934	6648107	1	pseudogene		chr4_13315636_1	chr4_13315636_1_Aegilops_tauschii	CYP71K47_6A_Triticum_aestivum(wheat)	94.22	329		CYP71K62P	MDADVPLHLLLLVPLLAIIPLILFASR*LTPPESSGVARLPPGPWALPVIGHLHHLAGAIPHQALRDLARRRGPLMLLRFGEVTAVVASSPDAAREILKTHDPAFASRPVGPMSRLWFQGSEGLVFAPFGDAWRQLRKICTQELLSARRVRQDELGRLLRAMASSSPSPSERRPVNLTEIIAAYIADSTVRAIIGSRPFKGRDACLKLFEDMFRMRPGLSLPDLFPSSRLAMLVSREPDRIKRCRREMLQITDTVIQEHRERKAAGEGDAEDEDLVDVLLGLQEEVGSQHPLTTKNIKFVMIDMFAAGSETATTARQWVMAEL
112	116	chr4	6700038		1	pseudogene		chr4_6700038_1	chr4_6700038_1_Aegilops_tauschii	CYP71K47_6D_Triticum_aestivum(wheat)	95.24	189		CYP71K63P	VMRNPRVRHKAQEEVR*AMAGHSKVTEDGLGNLHYPHMVVKESLRLHVPGPLLTLRQCRSPCQVLGYDVPAGAMVLVNSWAIARDPAHWDALEEFLPERFDQEQGGAGRDFKGTDFEFIPFGAGRRMCPGMMFGLAHIELALAALLFHFDLELPAGVDAAGLDMTEEAGITTRRRSELLVVATTLVPVP
117	117	chr7	88265732		-1			chr7_88265732_-1	chr7_88265732_-1_Aegilops_tauschii	CYP71M3_7D_Triticum_aestivum(wheat)	99	437		CYP71M3	MAPFLNPSPELKHALLWSVPILIIAPTVIFLYMQAVGKKKNTIRLPPSLLRLLIIGHLHLMVHEPHRSLQRLARSLGPVIHLQLGGIAAIVVSSPEAAKEVLKTHDVHCCSRPSSPGAKLITYGQQDIAFSPYNASWRERRKLFVSELVSSKRVQSFAYALEAQVGELIQSLSLRSPPTEAVNLNETLFTLIDGFIGRVAFGSMNGAKLMKYAKFQQVFSEAMVALSPFSAQDFFPTLPMSRWFDKLVGLEARYQRIFLELDSYFEMVLSQHMDPGRVKPDKDDLVDVLISLWKRQGKVTKDHLKALLMDAFIGGTTTSSVTLLWAMSELIKNPAVMKKAQAEIRSLVRVKQRLVQVDDLCKLNYLKMVVKETLRLHPPAPLLVPRETIDHVKVLGYDI…
116	118	chr7	88245761		-1	pseudogene		chr7_88245761_-1	chr7_88245761_-1_Aegilops_tauschii	CYP71M5_7D_Triticum_aestivum(wheat)	98.4	313		CYP71M5P	SRPPSPGKSFRRLPYSFSYCSPLSEYKWFSLWRLLPINRMITCPYLPFDMLNQARARLMTFGQQDIAFSPYNASWRELRKLFVSELVGSKRVHTFSHALEAQVSELIQSLSPMTEPVNLNEILFTLIDSFIGTVAFGSMKGAKLMKYAKFQRVFSEATVALYAFSAQDFFPASPMSRWFDKLVGLERRYLRTFLEIDSYLEMVISQHMDPGRVKPEKDDLVDVLISLWKDEGKVTKDHVKALLGDAFIGGTATSSVTLLWAMSELIKNPTVMKKAQAELRSLVGGKQRLVQVDDLSKLKGQTRGVLPGEXXDKPEEFYPERFDGVDTDFYGSHYELLPFAAGRRICPAIPMGSTIVEFTLASLLHSFDWELPKDMNIEDVSMEGTGRQLLCRKTPLYLV…
118	119	chr6	75111225		-1			chr6_75111225_-1	chr6_75111225_-1_Aegilops_tauschii	CYP71P10_6D_Triticum_aestivum(wheat)	100	521		CYP71P10	MEMELNLVSYVSIALFVLSGAYVYRTTRSRSPRQRLPPAPPGWPVIGHLHLLTDMPHHALAELAKTMRAPLLRLRLGSVPAVVISKPDLARAALTSNDAAMASRPHLLSGQFLSFGCSDVTFAPAGPYHRMARRVVVSELLSARRVATYGSVRGKELRRLLAHLTKNTAPDTPVDLSECFLNLANDVLCRVAFGRRFPHGKDDKLAAVLAEAQDLFAGFTVGDFFPELEPFASTVTGLRRRLKSCLADLREVCDDIVEEHVSGKHQRLPGDRDEDFVDVLLRVQKSPDLEVPLTDDNLKALVLDMFVAGTDTTFATLEWVMTELVRHPRILQKAQEEVRRVVGAKGRVEESDLAELHYMRAIIKETFRLHPAVPLLVPRETVAACTLGGYDIPAKTRVF…
119	120	chr4	523260025		1			chr4_523260025_1	chr4_523260025_1_Aegilops_tauschii	CYP71P9_4D_Triticum_aestivum(wheat)	100	514		CYP71P9	MELNLASYVSILLFVLSGTYVYCATRSRPRSPLRLPPSPPGWPVIGHLHLMTDMPHHALAELARSMRAPLLRLQLGSIPAVVISKPDLAREALTTNDAAMASRPHLLSGQFLSFGCSDVTFAPAGAYHRMVRRVVVSDLVSPRRVATYGSFRDEELRRLLAHLTESASTEETSVNLSKCLLNLANDVLCRIAFGRRFPHGKDDKLAAVLAESQDLYAGFAIGDFFPELEPLASTLTGLRRRLKSCLADLREVCDEIIEEHISGERQCIPDDRDEDFVDILLRAQKAPDLQVPLTDDNLKSIVLDIFIAGTDTTFATIEWTMTELMRHPRILRKAQDEVRRVVGAKGQVKESDLAELHYMRAIIKETFRLHPVVPLLVPRESIVACTLGGYDIPAKTRIF…
120	121	chr7	450869198		-1			chr7_450869198_-1	chr7_450869198_-1_Aegilops_tauschii	CYP71Q10_7D_Triticum_aestivum(wheat)	99.61	517		CYP71Q10	MAASSPPNPSPWSMGPLPPLVLSLFLLPLLYLFFRSGSKGRSTQGARNAPGPPKQLPVLGNLLQLGGRPHRYFQSLTQKYGPVVQVQLGRVRMVVVASPKAAKEVLRTNDLHCCSRPNSPGARMLSYNFLDVAFGPYSDYWREMRKLLVLELLSMRRVQSFAYARAAEVDRLVSSLAGTPPGTPVDLSEKLYALSDGIIGTVAFGKMYGSESFERTSFQRMMDETLRVLGSFTFEDFFPSWALARLADALTGVASRRRRVFLKIDRFFDAVIDKHLEPERLAAGVQEDMVDALVKMWRDQDGPLALTRDNIKGILMDTFAGGIDTCAVTTIWIMAELMRNPRVLRKAQSEVRAAVRNKCRVDEEDAQGLKYLKMVVKENFRLHPPGTLLIPRETMQSCE…
121	122	chr1	433776784		1			chr1_433776784_1	chr1_433776784_1_Aegilops_tauschii	CYP71R11_1D_Triticum_aestivum(wheat)	100	516		CYP71R11	MASPQLDSTLVLCLLFVVSCLAFVVRAFRTSGKDGAAHAAPPSPPALPIIGNLHQLGTGHLHRRLQALARSYGPLFLLRLGSVPTLVVSSASLADAVLRTQDHVFCSRPQQHTACGTLYRCRDIAFSPYGERWRQARCIAFVQLLSAKRVDSFRALRQEEIARFVGRIHAVSGAQENGGERRGVNVTELMLSLTNTVISRAAFGNKLGGVEPGMLRDMMGEISNLLGTIAVSDVFPRLRWVDWATGLDARVKRSAAKLDDILEKAVQEHEKSKGDDGGEARDLLDDLLSVVKDGDQGSKLDRTDVKAIISDMFLAGTDTTSKTIEWTMAELVKNPREMEKVQQEVRRVVGARAGVMEEDVEKMSLLKAAMKEALRLHATVPLLVPHESIKDTWLHGYYI…
122	123	chr1	337819704	337819862	-1			chr1_337818658_-1	chr1_337818658_-1_Aegilops_tauschii	CYP71R12_1D_Triticum_aestivum(wheat)	99.6	505		CYP71R12	MMALMASLQLDSTLAVLCLAFVASCIFLVARSRKDGARGSPPPSPPALPVIGNLHQLGRGRHHRRLQALARSYGPLFLLRLGSVPAVVVSSPSLAEAVLKTQDHAFCSRPQPRTARGTLYGCRDMAFSPYGERWRQLRRIAVLHLLSAKQVDSFRSLRQQEVMGFVERIRAGAREGAVNVTELVISLTNTVISKAAFGNRLGGVDPGVVRHMMKELTELLGTIAVSDVFPRLRWVDWATGLDARISRTAAELDRVIEKTLAEHEGSRGNDGEEVHDLLDGLLSIFKDGDQGFRLDRTDVKALILDMFIGGTDTIYKAIEWTMAELVKNPREMEKVQAEVRQVAAGTQGGVLEEELETMSLLHAAMKEALRLHPPIPLFPHESIQNTRLHGYDIPAKTRI…
124	124	chr1	433710940		1			chr1_433710940_1	chr1_433710940_1_Aegilops_tauschii	CYP71R13_1D_Triticum_aestivum	100	507		CYP71R13	MASLQLDSTLVLCLLFVVSCFTIVLRGFGYGRKGAQPPSPPGLPIIGNLHQLGRGRPHRTLEALARRHGPLMFLRLGSVRAIVVSSASLAEAVLRTQDNAFCSRPQQYTARGTLYGCRDVGFSAYSERWRQLRRIAVVHLLSVKRVDSFRALREEEVARFVERVRVASGAQENGSKRPGVNVTELIITLTYSVISRAAFGHKLGGEEPGKVRDMMKELTELLGTIAVSDVFPKLGWLVDWATGLDARVKRTAAKLDSIMERTITEHEGNPGNDGEARDLLDDLLSIAKDGDQGFKLDRVDVKGVILDMFIAGTDTTYKTIEWTMAELVKNPREMARVQSQVRQVAGAHGGVLEEELDKMNLLQAAMKETLRLHPAVPLLIPRESIQDAQLHGYDIPAKT…
125	125	chr1	433719561		1	pseudogene		chr1_433719561_1	chr1_433719561_1_Aegilops_tauschii	CYP71R19_1D_Triticum_aestivum	81	473	1 aa diff and one indel	CYP71R19P	MASLQLDSTLLLCLLFVVSCFTIVARGFRYGRRSAQPPSPPGLPIIGNLLQFGRGRHHRTLEALARRHGPLILLRIGAVRAVVVSSAPLADAVLRTQDHVFCSRPQQYMTRGTFYGCRDVAFSAYSERWRQLRRIAVVHLLSVKRVDSFRALREEEAARFVGRVRAASGAQEDGGKRPGVNVTELIITLTYSVISRAAFGHKLGGVEPAKVLFILASSPVAQSTSAVSDVFPRLGWLVDWATGLDARMKRAAKLDIIMERTITEHEEDPGNDGEARDLLDDLLSIAKDGDQGFKLDRIDVKGLILDMFIGGTDTTYKTIEWTMAELIKNPREMAKVQSEVRQVAAGAHGGVLEEELGKMNLLQAAMKETLRLHPAVPLLLPRESIQDAQLHGYAIPAKT…
126	126	chr1	433743577		1	pseudogene		chr1_433743577_1	chr1_433743577_1_Aegilops_tauschii	CYP71R13_1D_Triticum_aestivum	85	115		CYP71R20P	YDTLAKTRVMVTTWAIGKDNESWENGEEFRPERFLDGTIDYNGKDPRFLPFGVGRRGCPGIAFGTRLIKLTLANMMYHFDWELPGGQDPESFEVIEANGVSPGLKSALILAVKPL
126.1	127	chr1	433744119		1	pseudogene, adjacent downstream		chr1_433744119_1	chr1_433744119_1_Aegilops_tauschii	CYP71R13_1D_Triticum_aestivum	84	80		CYP71R21P	GRTIDYNGKDPRLLPFGAGKRGCLGMAFGTRLAKLTLANMMYHFD*ELPGGQDPDSSEVVEASGVSPGLKSPLIIAVKSL
123	128	chr1	433660500		1			chr1_433660500_1	chr1_433660500_1_Aegilops_tauschii	CYP71R14_1D_Triticum_aestivum(wheat)	98.81	503		CYP71R14	MASLQLDSTLLLCLLFVVSCLAIIVRGFGNGRRSAQPPSPPGLPIIGNLHQLGRGRPHRTLEALARRHGPLMFLRLGSVRAIVVSSAGKTVIAPGSPDTPLSGTVHTVGSRVPLQPTSLAGSSLLLLGLARRGGAEDPQDNVFCSRPQQYTARGTLYGCRDVGFSAYNERWRQLRRIAVVHLLSVKRVDSFRALREEEVARFVGRVRAASGSGAHEGRRGINVTELIITLTYTVISRAAFGNKLGGVEPVKVRDMMKELTDLLGTIAVSDVFPRLGWLVDWATGLQASVKRTAAKLDSIMERTITEHEEDPGNDDGEAPDLLDDLLLIAKDGDQGFKLDRIDVKGVILDMFIAGTDTTYKTIEWTMAELIKNPREMAKVQSEDAQLHGYDIPAKTRVMV…
127	129	chr2	430079524		-1			chr2_430079524_-1	chr2_430079524_-1_Aegilops_tauschii	CYP71S9_2D_Triticum_aestivum(wheat)	99.8	510		CYP71S9	MASLQAPELLACLLVVLATLLLLKQLLAPSKRRSASASPSLPRPRGLPLIGNLHQLGALPHDSLAALAAKHDAPLMLLRLGSVPTLVVSSADAARAAFQHNDRAMSGRPALYAAARFSYGLQNISFAPSEGAFWRAARRACLSELLGAPRVRGFREAREGEAAALVAAMADASGAGAAVDLSKLLLVASNKIVRRVAFGGDDGGEGGAEASAVLKETQRLLGAFWVADYVPWLGWLDAPRGLRGRLERNFHQLDAFYESVIDSHLKRRASSSADDEEDLVDVLLRLHADPAHRSTFSSRDQIKGILTDMFIAGTDTSAATVEWTMTELVNHPDILAKAQHEVRSVVGDNGMVREPDLPELTYLKLVIKESMRLHPPVPLLVPRETTEPCTVHGCEIPAG…
133	130	chr3	133696472		1			chr3_133696472_1	chr3_133696472_1_Aegilops_tauschii	CYP71T40_3D_Triticum_aestivum	99	516		CYP71T40	MAVSPLALLLLLLAFAVSLLYILRRPAPLRSGSDGGRRHPPPSPRGLPLLGHLHLLGSLPHRALRSLAAAHGPVLLLRLGRVPAVVVSSPAAAEEVMKARDLAFASRPRSAMADRLLYGRDVAFAPYGEYWRQARRVCVVHLLSPLRILSFRGVREEEAAALVERVRGAGAGGAVVDLCELLVAYANTVVSRAAFGDDSARGLYEEGNKGRELRKVFNDFQELLGTAPVGELLPWLGWLDAVRGMEGKIRRTFKALDGVLEKVIDDHRRRRQAGQQTGDDGGDHRDFVDVLLDVNETDNDAGMRLNTTEIKAIILDMFAAGTDTTSTAMEWAMAELITNPDSMRKLQDEIRAAVGGSVHVITEDHLHKLHYLKAVVKETLRLHPPIPLLVPREPQNDAE…
128	131	chr1	243287393	243287205	-1			chr1_243286292_-1	chr1_243286292_-1_Aegilops_tauschii	CYP71T42_1D_Triticum_aestivum(wheat)	100	505		CYP71T42	MTTVSLIVMLFNSPFVLTTLAFLLFTLLVSKTRSKVAARRTLPPSPPSLPVFGHLRLLGSLPHRSLRSLAASYGPVMYLRLGRVPTVVACSAAAAEEAMKTRDLAFASRPKLFMVDRFYYGTGGIGFAPYGEHWRQARRVCVTHMLNPHRLLSFRRVRGQEVAALVDRVRRAGTVVNLSDNLIVYSFTAISRATFGDADYGIDGEEGGARLRKVFAEIEELLGTVPMGEKVPWLRWVDVVTGLERKARRAFEEMDGLLERVITDHRQRRGAGDGDQRDFVDVLLAAKELDTNGIKAIILDMLAAATDSTFTLLEWAMAELINHPQEMRKLQDEVRTAVGDAGHVTEDHLPDLRYLKAVVKETLRLHPPTPLLLPRETVEDTQLLGYHVPAGTRVLIHAW…
129	132	chr1	242804380	242806074	1			chr1_242805781_1	chr1_242805781_1_Aegilops_tauschii	CYP71T43_1B_Triticum_aestivum(wheat)	96.92	520		CYP71T43	MAVLHAAVLFLIPTLVVSLIYLLSGKKRISNGKLRLPPSPPGLPFLGHLHFLGSLPHRGLGSLAAKHGPVLLIRLGRVPTVLVSSAVAAEEVMKCRDLAFASRPRVVMAERLLYGRDVAFAPYGDYWRQTRRICAVHLLSPRRILSFRRVREEEAAALVERVRTSAGAGAVVDLSELLIAYANYVVSRAAFGDDSARGLYEGDDRGRELRKVFAEFDVLLGTTPLGELLPGMGWVDSVRGLEGKARRTFEALDGMVEKVIEDHRRRRRQAGGRQMRDDVDGNDHRDFVDVLLDVNETDKDAGVRLGTVEIKAIILDMFAGGTSTTTTAMEWTMAELITHPRAMRKLQDEIRAAVGGADHVTEDHVDKVGYLKAVVKETLRLHPPVPLLVPREPPADAEI…
130	133	chr3	133387872		1			chr3_133387872_1	chr3_133387872_1_Aegilops_tauschii	CYP71T45_3D_Triticum_aestivum(wheat)	100	529		CYP71T45	MDASSLFALLHSPLLILALLVPIVSFVLFFAKKPQPSGSNGGPRLPPSPWGLPILGHLPLLGSLPHRKLRSLAEAHGPVMLLRLGGVPTVVASSADAALEVMKTHDLAFASRPAVRMAERLLYGRDMAFAPYGQYWRQARRVCVLHLLSARRVASFRRVREQEAGALVDRVRRAAASCSRPEGDVVNLTDELISYTSAVISRAAFGDDGGYGIDDDLTEVFAEFEELLGTAAVGEFVPWLAWVDALMGLDAKVARAGKVMDRLLERVISDHRQRRLGGGRRLVGDGEDDHRDFVDVLLDVSEDDGEDSGGVRFDTVGIKAIILDMFAAATDTTYTTLTWAVAELINNPSEMHKLQDEVRAAVNGAGHVTEDHLEKMSYLRAVIRETLRLHAPLPLLLPR…
131	134	chr3	133440626		1	last exon only, seq gap above may hold the N-term exon		chr3_133440626_1	chr3_133440626_1_Aegilops_tauschii	CYP71T46_3D_Triticum_aestivum(wheat)	100	207		CYP71T46	DMFAAATDTTYTTMEWTMAELINHPRVMQKLQDEIRAAVNGAGHVTEDHLGTLRYLRAVIRETLRLHAPLPLLLPRETLEDTELLGYRVPARTRVVINAWAIGRDPATWERAEEFVPERFVDDPAEYGAGHDDFRAVPFGAGRRGCPGVGFAVPSMELALAGLLYHFDWEPPLAAGGAASKLDLSELFGISVRLKTALHVVAKPWSP
256	135	chr3	615637700		1			chr3_615637700_1	chr3_615637700_1_Aegilops_tauschii	CYP71T47_5D_Triticum_aestivum(wheat)	79.18	514		CYP71T51	MAAEMVAALFNSPYALTVLAFLLGVMVLVSSSKRNRNSGRQGQLRLPPSPPGLPVVGHLHLLGSLPHRSLRALAATYGPVMHLRLGRVPTVVACSAAAAEEAMRTRDLDFASRPRLLMVDRFYYGTGGIGFAPYGEHWRQARRVCVTHMLNARRVASLGGVRAQGAAALVDRVHRHAGAVVNISDNLIVYSNTVISRCTFGDTDYGVEGGGGGARLRKVFAEIEELLGTVPMGETVPWLRWVDVVTGLEKKARRVFEEMDGLLERAIADHRQRRRAGAATGEEGDFVDVMLDAEELDTGSIKGIILDMLAAATDSTFTLLEWAMAELISHPHEMRKLQDEVRAAVGPAAGAVVTEEHLPRLPYLKAVVKETLRLHPPTPLLLPRETLEDTRLLGYDVPA…
132	136	chr5	549287460		1	pseudogene, FRAMESHIFT AFTER RAAA		chr5_549287460_1	chr5_549287460_1_Aegilops_tauschii	CYP71T47_5D_Triticum_aestivum(wheat)	98.06	516		CYP71T47P	MVAEMVVEPLNSPALITLLAFLLVVITLLVSTRRSSNAPRLPPSPRGLPVVGHLHLLGSLPHRSLRSLASSLGPVMHLRLGRVPTVVASSPAAAEEAMKTRDLDFAGRPRLLMVDRFYYGTGGIGFAPYGDHWRQARRVCAVHMLSARRVASLGRVRAQEAAALVGRVRRAGISGGVVNLSDSLNGYSNGVISRCTLGDADCGVEGGGARLRKAFGEMEELLGTVPMEETVPWLGWVDTVTGLERKAKRVFEEMDGLLERVIADHRQRRRAAAATGDVEDFVDVMLDADELDTGSIKSIILDVLAAATATTFALLEWAMAELINHPHEMRRLQAEVRSAVGPDPGASAVVTEAHLPRLPYLKAVINETLRLHPPSPLLLPRETLEDTRLLGYDVPAGTR…
135	137	chr7	178616615		1			chr7_178616615_1	chr7_178616615_1_Aegilops_tauschii	CYP71U12_7D_Triticum_aestivum(wheat)	100	518		CYP71U12	MALATILLTFILRQVLGGKGTGARLPPGPWNLPVIGSLHHLVATKLPPHRALFRLSRRHGPLMLLRLGEMPNVIVSTPEAAMLVLKTNDLTFATRTSGPTLDVVGSASEGIIFAPYGEHWRQMRKICVVELLSAMQVRRIQSIMQAEIAHLVESVVAASSASPSGSAVVDVGKGLARLTNSVIARAVFGGKSRQQEAYLRELDVMAILGGGFSLVDLFPSSRLVRWLSSSGRAMRRLHSRMQRILGDIIQDRKEKKVPNGASDAPATARDNEDLLDVLLRLGKEDTLSFPLTSEIISAVIFDIFSAATDTTAATLEWAMAELVRNPEAMARAKLEVRQMLGHRRSSTITSADLAGLHYLRMVIKETLRLHPSAPLIHRASQENCRVMGYDIPKGTAVMI…
136	138	chr3	37251501		-1			chr3_37251501_-1	chr3_37251501_-1_Aegilops_tauschii	CYP71U6_3A_Triticum_aestivum	91	510	next best hit 81% to CYP71U5 Hordeum vulagre barley	CYP71U6	MEMDQLSYGSLCGMAVATALLWLILRQALGVVGGKEDTGGAEANKLPPGPWTLPVIGSLHHLVGTKLPPHRALLQLSRRHGPLMLLRLGEVPNVIVSSPEAAMEVLKTNDLAFATRPCGPTMDIVSCGGKGLLAPYGEHWRQMRKVCVTEVLSARQVRRIESIQRGEAARLVESVSAAATACAVVDVGKGLAELAGNIIAGAVFGGRFPQQEAHLREMDALSALVGGFGLVDLFPSSRLARWLSSSTRDVRRSHARVQRILDDIIQDRKEKKPTAAAASPAARDSEDLLDVLLRLQREDTLTFPLTSESIGCVISDIIGAATETTSSTLEWAMAELIRNPEAMAKAQHEVRQRPHGDGVVTDLGELHYLRMVIKETLRLHPAGMFHRASQEDCRVMGYH…
137	139	chr2	8833634		-1			chr2_8833634_-1	chr2_8833634_-1_Aegilops_tauschii	CYP71U8_2D_Triticum_aestivum(wheat)	98.28	523		CYP71U8	MDIDQLPCGSFCMVAVATILMSLILRQVLSGKHTGAKLPPGPWNLPVIGSLHHLVGTKLPPHRAFLRLARRHGPLMLLRLGEVPIVIVSTPEAAMEVFKTNDLAFATRPSGPTVDIISSGGKGFALAPYGDHWRQMRKVCIMELLSTRQVRRLDSIKQAEVTHLMESVATASSASSSAIIDIGKELARLTNNIIARAAFGGKCRQQEVYLRELAVLASLVGGFSLVELYPSSRLVRWLTGDSRDVRRSHPQIQRILADIIQERKEKKQRNASAAATATPNEDEDLLGVLLRLHEEDTLNFPLTLETVGTIIFEIFGAATDTTASTLEWAMAELIRNPHVMARAKLELQQRLGHHRGSTVTSADLHGLHYLRMVIKETLRLHPSVSLIHRAAMEDCQVMG…
134	140	chr2	20303995		1	pseudogene		chr2_20303995_1	chr2_20303995_1_Aegilops_tauschii	CYP71U9_2A_Triticum_aestivum(wheat)	75.73	206		CYP71U14P	DIFGAATYTTAATLEWAMAELMHSPKTMARAKLELQQKLGHHRRPTITKADLGDLHYLQMVIKETLRXXXXXXLTHRASKEDCRVMGYDIPKGMSVIINAFAVGTKPRHWGQDAAEFRLERFEEMGVEYYSQGPQMEFVPFGAGPMQCPGALFATTTMELVLGNLLYHFDWSIPGGAGPETLDMSEAFGIVVHRWSSMCLQAAAAC
139	141	chr4	17049483		-1			chr4_17049483_-1	chr4_17049483_-1_Aegilops_tauschii	CYP71V11 Brachypodium distachyon	90.84	513	no better hit in wheat, 59% to CYP71V31_5D_Triticum_aestivum	CYP71V11	MEDATYNTILVVLLAVSMIYFFKPASGRRPPGPRTLPIIGSVHHFVNTLVHRRLRDLAGVHGPIMMLKIGPMPLVVVTSRELAREVLKVQDPNFANRPRLLVGGICGYGWTDIIFAPTSDYWRKIRKLCIHEILSPKRVLQFQFIREEEVQRQVDLIRAAAAAGEPVDVTRMVYDISSRTISRSAFGEVRPDMPVFQHAIKRVVGLSSGFNVPDLFPRLKEVLGEATGMKRKLREIHRTFDDILVDIIEGRRRVRADKIAAGKDVVDENVVDVMLSLQKGDNPWGFPVTDNTIKAVVLDMFAGGTGTSGSSTEWAMSEIMRTPRVMKKLQDEVRRAFHGKESISETELRSNSVRYLKLTMKEAIRLHPAAPLLVPRESIETTEIGGYVVPAKSRMVVNA…
138	142	chr4	17046946		-1	pseudogene		chr4_17046946_-1	chr4_17046946_-1_Aegilops_tauschii	CYP71V19_Sorghum_bicolor	82.88	111	no better hit in wheat, 69% to CYP71V35_U_Triticum_aestivum	CYP71V37P	MMVNAWATSRDPWYWKDPEEFSPERFEEDGAVDFHGLHFEFTPFGAGRRMCPGYNYGLAGMKLTLL*LMYHFDWRLPAGIDEVDMMESMGLGVRRKNPLMLYATP*VPLPAA
140	143	chr2	369239446		-1			chr2_369239446_-1	chr2_369239446_-1_Aegilops_tauschii	CYP71V28_2D_Triticum_aestivum(wheat)	100	473		CYP71V28	MEGTYFQLLLVSLVALALQQLLKLAKKPSRRMPPGPWKLPVIGSLHHLMNVLPHRALRDLANVHGPLMMLQLGETPLVVASSKEMAREESRTRKLYTTELLCTRRVLSFRHVREEEVMVRVEQIRKAGPSTPVNLSLILHELTTAMLLRAAWGKTRIKNMPELLAGVRTGIALSSGFSVPDLFQTWRRSVLAAVTGMKRGLESLHKAVDSVFEEVIEERMCARAENVKTGAENVDENLVDVLIGMQEKGDSVFPIDKPRIKAFLLDTLAAGTGTSGSAMEWTMSELIRNPKVMAKLQEQIREAFRGKAVVTEGDMQAADIRYLKLVMKEALRLHPPAPLLVGRESIDVCEVDGYTITAKSRVLVNVWAISQDPKYWDAPEEFKPERFEKGDIDFMGSHY…
141	144	chr3	39564999		-1			chr3_39564999_-1	chr3_39564999_-1_Aegilops_tauschii	CYP71V29_3D_Triticum_aestivum(wheat)	99.8	507		CYP71V29	MDELYVQALVLAAVAVALLQLLKAALNPMRERAPPGPWKLPVIGSMHHLVNVLPHRKLRDLADAHGPLMMLQLGQTPLVVASSKETARLVLKTHDSNFATRPKLLAGEIVGYEWADILFSPSGDYWRKLRHLCTTEILSPKRVRSFRHIREDEVSMRVDQIRQAGPSAPVNLSVMFHNVTNSIVARAAFGKKRKNAAEFQAAIKSGVGLASGFNIPDLFPTWTTVLAKLTGMKRRLQDIHKTVDAILQEIIDERKAARIEKIMAGAENVDENLVDVLIGLQEKGGFGFHLDNSRMKAIILDMFGGGTGTSASAMEWGMSELMRNPRVMKKLQGQIREAFKGKAVVTEDDLQESNLQYLKMVIKEALRLHPPAPLLVPRESIDQCELEGYTVPAKSRVII…
142	145	chr5	467008124		1			chr5_467008124_1	chr5_467008124_1_Aegilops_tauschii	CYP71V31_5D_Triticum_aestivum(wheat)	99.8	507		CYP71V31	MDELYVQSLVLAAVAVALLQVLKVYLNPVRERAPPGPWKLPVIGSMHHLLNVLPHRKLRDLADAHGPLMMLQLGQTPLVVVSSKETARLVLKTHDTNFATRPKLLAGEIVGYEWADILFSPSGDYWRKLRQLCAAEILSPKRVLSFRHIREDEVMMRVEQIREAGPSTPVNLSVMFHSVTNSIVARAAFGKKRKNAAEFMAAIKSGVGLASGFNIPDLFPTWTTMLATVTGMKRSLQGIYTTVDAILEEIIAERKAARADKIKAGAENVDENLVDVLIGLQEKGGFGFHLDDSRMKAIILDMFAGGTGTSASAMEWGMSELMRNPRVMKKLQAQIREAFKGKAAVTEADLQASNLQYLKLVIKEALRLHPPAPLLVPRESIDHCEVEGYTVPAKSRVVI…
144	146	chr4	340754978		1	pseudogene		chr4_340754978_1	chr4_340754978_1_Aegilops_tauschii	CYP71V33_6A_Triticum_aestivum(wheat)	76.53	507		CYP71V38P	MADLLYQSFLLLGVAVVLLRILKLSLQPKVRNPPGPWKLPVIGSMHHLLNVLPHRALRDLAGVHGPLMML*LGGTPLVVVSSREMAREVLRTHDANFATRPRLLAGETLMYGCSDILFSPSGTYWRKLRQLCAAEILSANRVRSFRHIREQEVRNHVENIHAAGPSTPVDPNDKKTISIVSRASFGNKHRNVQEFLSAIKSGVALAGGFKIPDLFPTWRSVLAKVTGMRRTLEDVHMTLDSTLEGVIEEREGIRKDRVKSGASSDVEENVVDVLIGLQEKGGIGFHLNTNSIKGVILDMFVAGTGTLASSLDWGVSELMRNPRVMDKLQREIRVAFRGRATINEGDIEASELPYLKLFIKENLRLHPPAPLLVPRECVEACEVDGYLIPAGSRLLVDAW…
146	147	chr4	340831479		1	missing the C-term exon, possible pseudogene		chr4_340831479_1	chr4_340831479_1_Aegilops_tauschii	CYP71V33_6D_Triticum_aestivum(wheat)	75.97	462	cannot find the last exon, 96% to chr4_340754978	CYP71V39P	MADLLYQSFLLLGVAVVLLRILKLSLQPKVRNPPGPWKLPVIGSMHHLLDVLPHRALRDLAGVHGPLMMLQLGGTPLVVVSSREMAREVLRTHDANFATRPRLLAGETLMYGCSDILFSPSGTYWRKLRPLCAAEILSANRVRSFRHIREQEVRSHVENIHAAGPSTPVDVTMTFFNLTINIVSRASFGNEHRNVQEFLSAIKSGVALAGGFKIPDLFPTWRSVLAKVTGRRRTLEDVHMTLDSTLEGVIEEREGIPKDRVKSGASSDVEENLVDVLIGLQEKGGIGFHLNTNSIKGVILDMFVAGTGTLASSLDWGMSELMRNPRVMDKLQREIRVAFRGRATINEGDIEASELPYLKLFIKENLRLHPPAPLLVPRECVEACEVDGYLIPAGSRLVV…
143	148	chr6	92041402		1			chr6_92041402_1	chr6_92041402_1_Aegilops_tauschii	CYP71V33_6D_Triticum_aestivum(wheat)	100	508		CYP71V33	MADLLYQSIILSVVAVVLLQVLKLRVRPRARTPPGPWRLPVIGSMHHLLNVLPHRALRDLARVHGPLMMLQLGQTPLVVVSSREMAREVLRTHDASFATRPKLLVGEVVLYSYADILFSPSGSYWRKLRQLCAAEILSPSRVLSFRHIREQEVRNHVQDIHAVGPSTPVDVTAIFSGLAISIISRASFGNKQRNAREFLSAVKTGVTLASGFKIPDLFPAWRSVLARATGMRRALEDVHATIDSSLDEAIDERKRVRQGKARSGGAPVAVEENLVDVLIGLQEKGGLHRLSTNSIKGVIVDMFVAGTGTISSSLDWGMAELMRSPRVMGKLQRELREAFRGRAAIGEHDIDAASLPYLKLVIKENLRLHPPAPLLVPRESIHACELGGYVVPAGSRVVV…
145	149	chr3	37243952		1			chr3_37243952_1	chr3_37243952_1_Aegilops_tauschii	CYP71V25_3A_Triticum_aestivum	98	509		CYP71V25	MLLTMDDDLVYLCSALVVSLLAIAAVQLLKPRPRLPPGPLNLPVIGSAHRLVNALPHRTMRELASVYGPLMYLRVGHVPVVVVTSKELAREILKTHDAIFATRPKLMSGDIVAYGSTDLLFCPTPGDYFRKLRKLCVQEILSNDRIRSFQDVREDEVRSLVEDIRAAGPSAPLDLSRKIYKLTNGIVSRAAFGMKSSKAEDFVAAIKHSFVYSTGFSIPDLFPGFTGILSFLTGMRRNLEGVRDTIDGILEEIIDEREQILKSGRSTASEKNLVEVLLGLIGNEDFGFPITRSTVKAVVLDIFAGGTETSGTSMEWAMSELVMNPKVMKKLQGEIREAFRGKEFISETDLRASGSCIKYLGLVIKETFRLHPPAPILVPRESTEACEINGYVIPAKTRV…
147	150	chr2	2445561		1			chr2_2445561_1	chr2_2445561_1_Aegilops_tauschii	CYP71W28_2D_Triticum_aestivum(wheat)	97.01	501		CYP71W28	MEPAALPLLWSVLPLIILLFLLVVKIYTSTPAGKRLPPGPWQLPLVGSLHHFLLSRHGDLPHRALQELSRKHGPLMLLRFGAVPTLVVSSAEAAREVLKTHDAAFASRHLTPTLDIFSRGGQDILFSPYGDLWRQLRRICLLELMSARRVLSFRHIREDEVAALIGYITDECARGGGCTVVEIGQLITRTVNDIVVRSAVGGRCPRRDEFLHVLDRSVKLAGGFNLSDLYPSSALARWLSGALRETERCNRKARAIMDDFIRERIDGAGESMEDLLGVLLRVQKDGGTQCPLDLTTDIITTVVQEMFVAGSETSSTTLEWAMSELVRNPRVLHKAQTEVREALHGRSKLVEGDLAGGRLSYLNLVMRETLRLHAPLPFLLPRQCREPCEVMGYHIPEGT…
148	151	chr5	500342160		1	pseudogene, deletion at I-helix		chr5_500342160_1	chr5_500342160_1_Aegilops_tauschii	CYP71W29_5A_Triticum_aestivum(wheat)	85.61	535	next best match is 71% to CYP71W32_6D_Triticum_aestivum	CYP71W29P	MQEISSSFHTPTMELVALPLLGLLAFLLADLVVKRVYAHASPSPRKRLPPGPWQLPLIGSLHHVLLSRHDALPHRALRELAGRHGPLMLLRFGVVPTLVASSAEAAREVLKTHAAAFASLYMTPTLAVFTHGGQDVLFSPYGDLWHQLRRVCVLELISARRVQSFCHIHEDEAGGLLRSVADECARSRSDGAVVEIGERLAWVVNDVVVRSASAVGSRCAWREEFLHELDETARLTASNSLPDLFPSSTLVRWLGSGLREAEQCNRNAHDILGDIIRERAEGGQGSGDDGEDDLLGVLLRVRKEDGGVKCALTTDAIITVVLSETLAMTLEWAMSEIVKEPRLLCKVHAEVWEVSKGQQKLTEGDMGKLSYLHLVIKETPRLHTLVPFLLPWQCREACE…
149	152	chr5	66562187		1			chr5_66562187_1	chr5_66562187_1_Aegilops_tauschii	CYP71W30_5D_Triticum_aestivum(wheat)	100	507		CYP71W30	MIDFTALVSLFFVLLILKLVTGRYASPIRGQRLPPGPWQLPLIGSLHHLLLSRSGGLPHRAMRDLSRAHGPLMLLRLGAVPTLIVSSAEAAREVMRTHDAAFASRHLSATLDIITCGGKGILFSPYDDRWRELRRVCVHELFSQPRVLSFRPVREDEVARLLHAVSDGCRGGRAVNLSEKMCRMITDSVVRAAIGERCDHRDEFLHELDEAVRLTGGINLADLYPSSRLVRRLSVAARDMVKCQRNIYRIVQSIIRVRERAGAPEPERDEDLLGVLLKLQKDGGLQFELTTEMITAVILDVFSAGSETTSTTLEWAMSELMKNPRVLHKVQSEVREAFKGKDKLTEEDIVKVRLGYLQLVIKEALRLHPPGPLLLPRECRETCRVMGYDVPKGTKVVVN…
150	153	chr5	66679856		1			chr5_66679856_1	chr5_66679856_1_Aegilops_tauschii	CYP71W31_5D_Triticum_aestivum(wheat)	100	508		CYP71W31	MMDFTALSPLLLLFLVLLILKLVIDHYASPTRGQRLPPGPWQLPVIGSLHHLLLSRSGDLPHRAMRDLSCSHGPLMLLRLGAVPTLVVSSAEAAREVMKTHDAAFASRHLSATLDIISCGGKGILFSHYNDRWRELRRICVHELFSQRRVLSFRPAREDEVARLLRAVSDGCRGGQAVNLSEKMCRMTNDSVVRAAIGGRCRHRDEFLHELDEAVRLTGGINLADLYPSSRLVRRLSVAARDMVRCQRNIYRIVQSIIRERAGAATAERDEDLLGVLLRLQKDGGLQFELTTEIISTVIFDIFSAGSETSSTTLEWAMSELMRNPRVLHKVQSEVREAFKGQDKLTEDDITKVRLGYLHQVIKEALRLHPPAALLLPRECRETCRVMGYDVPKGTKVFV…
151	154	chr6	68376634	68377053	1			chr6_68376634_1	chr6_68376634_1_Aegilops_tauschii	CYP71W32_6D_Triticum_aestivum(wheat)	100	517		CYP71W32	MELVALPLIGFLVSLVILLVNLVVKIHPTPPAPGKKRLPPGPRQLPLVGSLHHVLLSRYGDLPHRALRELAGRHGPLMLLRFGAVPTLVVSSAEAAREVLKTHDAAFASRHLTPTLAVFSRGGHDILFSPYGDLWRQLRRVCVVELLSARRVQSFRHIREDEAARLLRSVSDECARSGDAGFGAVVEIGQAMSRMINDVVVRSAVGSRCPRRDEFLREIDESVKLTAGFNLADLFPSSALVRWLSRGLRETERCNRHVRDILNDIIRDRTGGADGSDGEDDLLGVLLRVQRDGGEKCALTTEIITTVILEMFAAGSETSSTTLEWAMSELARNPRLLRKAQAEVREACKGQRTPTEGDMGSLSYLHLVIRETLRLHAPVPFLLPRQCRERCEVMGYEVP…
152	155	chr6	124488585		1			chr6_124488585_1	chr6_124488585_1_Aegilops_tauschii	CYP71X23v2_Saccharum_spontaneum	69.98	453	no better hit in wheat	CYP71X50	MCSRLPYRAMADLSRRLDAPLMYLRLGEVPVVVASSPEAAREIMKTHDVNFATRPWSPTMRVLLADGEGLVFAPYGPLWRQLRRISILELLSARRVQSFRRVREEEVGRLVAAIAAATPGEAVNVSQRVYETTMDMTMRSIMGDRFEKRDDFLQVFAEGVKITSGFNLGDLFPSSRLASFLSGTARRAEANHRKNGELVDCVIRQHEEKKAAAADGAVDEEDLVDVLMKIHKEGGLEVPVTMGVIRAFILDLFAARGETTANALQWAMSELMRNPEAMHKAQAELHHNLQGKTTVTEEDLADLKYLKLVIMETLRLHPVVPLLLPRECQETCKVMGYDVLEGTTVFVNAWAIGRDPKYWADPEEFKPERFESGTLDFKGTHFEFIPFGAGRRMCPGVAF…
153	156	chr1	339407461	339409542	-1			chr1_339407886_-1	chr1_339407886_-1_Aegilops_tauschii	CYP71X30_1D_Triticum_aestivum(wheat)	99.21	508		CYP71X30	MEQWVYYLCLLLALLLPLLLFKLNRKHSGGNSGVRLPPGPWRLPLIGSLHHLAGNPLMHRVTADLAHRLDAPLMYLKLGKVPVMVATSPEAARETMRTHDIVFATRPLSPTLKIMNSEGLVFAPYGALWRQLRKICILELLSVRRVQSFRHIREDEVCRLVAAITATPPMKLVNVSERIAILINDSAVRAMIGERFRRREEFLQTLEDGVKIASGFSLGDLFPSSWLAIFISDTTRRAEEYHQKSFELMEYAIKQHEEQRATTASASGAVEEGEDLVDALLRIRKEGGLDVPLTMGMIKAVILDLFGAGSETSAITLQWAMSELMRSPNVMRKAQAEVRKNLQGKPKVTEDDLINLKYLRLVIKETMRLHPAAPLLLPREASEPCKILGYDVPEGTTML…
155	157	chr2	33689712		1			chr2_33690888_1	chr2_33690888_1_Aegilops_tauschii	CYP71X32_2B_Triticum_aestivum(wheat)	90.57	509		CYP71X51	MTMEQAIYLVLALLLPLLLLKLNRKRGHGVGQQLPPGPWRLPVIGSLHHLAGNPLFHRAFADIARRLGDAPLMYVKLGEVPVVVASSAEAAREVMKTHDVTFATRPWSPTTKIIMSDGVGVAFAPYGAHWRQLRKICIMELLSARRVQSFRNVWEEEVTHLVAAISASTGDPVNISERLTVLIADMTLRAMIGDRFSKREEFLEVLQQGVKILSGFNLADLFPSSWLIGFVSGSARQAWENHTKAFELIDCAIKQHREVKAAAAASNGDRKEGEQEDLLDVLLRIQKEGGHDVPFTMGAIKCLLVDLFSAGSETSATTLIWAMSELMRNPTTMAKAQAEVRNHLQGKPSVTQDDLDDLKYMRLVIKETLRLHPSVPLLLPREPTEACKVLGYDVPTGTT…
154	158	chr2	33685534		1			chr2_33686934_1	chr2_33686934_1_Aegilops_tauschii	CYP71X32_2D_Triticum_aestivum(wheat)	99.21	509		CYP71X32	MAMEQAIYLVLALVLPLLLLKHIRKRSGGAGQKLPPGPWRLPVIGSLHHLAGKPLVHRAFADIAHRLGDAPLVYLKLGEVPVVVASSAEAAREVMKTQDVTFATRPWSPTTKILMSDGVGVAFAPYGAHWRQLRKICIMELLSARRVQSFRNVREEEAGRLVAAIAAGAGKGEPVNVSERLAVLIADMTVRAMIGDRFSRREEFLEVLQQGVRILSGFNLGDLFPSSRLVGFVSGSARQAWENHTKGFELIECAIKQHEEVKATTAASNGDGKVGEQEDLLDVLLRIQKEGGHDVPFTMGAIKCLLVDLFSAGSETSATTLIWAMSELMRNPTTMAKAQAEVRNHLQGKPSVTEDDLADLKYMRLVIKETLRLHPSVPLLLPREPTEACKVLGYDVPMG…
156	159	chr6	168456078	168458034	-1			chr6_168456515_-1	chr6_168456515_-1_Aegilops_tauschii	CYP71X33_6D_Triticum_aestivum(wheat)	100	518		CYP71X33	MNTMAVDQAACYLLCIVLTLLLPPLLLKLVKRGGNDGLNLPPGPWRLPVIGNLHQVARGGPLVHRTMANLARRLDAPLMRLQLGELRVVVASSADAAREIMKTHDASFATRPWNATTRLLRADGEGLVFARYGALWRQLRKLCVAELLSARRVRPFRRAREEEARRLVAAVAEAASSGQAVNVSERIATVVADSTMRVMIGDRFERREEFLEELAEIVKVGAGFSLDDMFPSWRLASAVGGMTRRAELNHRKTYELMDCVFRQHQQLREAVAEGAIKEEEEDLVDVLLRIQKEGGVEVPLTTGNIKAVILDLFNAGSETSANTLQWAMSELMRNPLVIHKAQVELRNSLQGKSTVTEDDLAGLKYLKLVIKETLRLHTVLPLLLPRECRETCNVMGYDV…
164	160	chr7	16649594	16653002	1			chr7_16652574_1	chr7_16652574_1_Aegilops_tauschii	CYP71X37_4A_Triticum_aestivum(wheat)	90.55	508	89% to CYP71X30	CYP71X52	MEQWAYYLCLLLALLLPLLLFKLNRKHSSGNGGVRLPPGPWRLPVIGSLHHLAGNPLMHRVMADLAHRLNAPLMYLKLGEVPVMVATSPEAACEIMRTHDVVFATRPWSPTMKIMNSEGLVFAPYGTLWRQLRKICILELLSARRVQSFRHIREDEIYRLVAAVAAVLPMEPVNVSERIAVLITDSAVRAMIGERFKRREEFLQTLEDGVKIASGFSLGDLFPSSWLASFISGTTRRAKEYHHKSFELMEYAIKQHEEQRATAASENDAVEEREDLVDALLRIRKEGGLDVPLTMGMIKAIILDLFGAGSETSATTLQWAMSELMRHPNVMQKAQDEVRNNLQGKPKVTEDDLINLKYLRLVIKETMRLHPAAPLLLPREAREPCKILGYDVPKGTTVL…
157	161	chr4	510449569	510451940	1			chr4_510451338_1	chr4_510451338_1_Aegilops_tauschii	CYP71X38_4D_Triticum_aestivum(wheat)	98.77	488		CYP71X38	MEQPAYCLCLFLALLLPLLLLLKLYRRNHGARYGGVCLPPGPWQLPVIGSLHHLAGNPLAHRVMADLARRLDAPLMYLKLGEVPVVVATSREAAREIMRTHDAVFASRPWSSTFKSYEMDGQGLIFARYGALWRQLRKICVMQLLSPRRVQSFRRIREEELARLVAAVAATPPGELVNVSQRIAVLITDSAIRAMIGDRFKKREEFLQAIDEAVKLFSGFNLGDLFPSSGLASFIGGTARLAQENSRKCSELMEYVINQHEDQSSVEEQEDLVDVLLRIRKEGGLEVPLTMGTIKTVIFDLFGAGSETSATTLQWAMSELMRHPNVMRKAQAKVRSNCQGKHKLTEDDLADLKYLQLIIKETLRLHPAAPLLIPREASEPCKILGYDVPKGTMVLVNAW…
158	162	chr3	444758602		-1	last exon only		chr3_444758602_-1	chr3_444758602_-1_Aegilops_tauschii	CYP71X39_6B_Triticum_aestivum(wheat)	79.81	208	cannot find the first exon	CYP71X-fragment	DLFSAGSDTSANTVQWAMVELMRNPKATQKAQAELRDTLQGRPTVTEDDLANLSYLKLVIKEMLRLYPAVPLLLLRECCKTCKVMGYDVPKGATVFVNMWAIGMDSKHWVVAEMFKPERFESGTIDFKGVDFEFIPFGAGRRMCPGVSFVQPSMELVLASLLYHFDWDLPVGVSPNELDMEEELGVTHRRKNGLHLRPVIRVPVQATL
159	163	chr6	124261330	124263113	-1			chr6_124261758_-1	chr6_124261758_-1_Aegilops_tauschii	CYP71X40_6D_Triticum_aestivum(wheat)	99.8	499		CYP71X40	MEQATYYLCLLLALLLPLLLLKLSRKRGGAVRLPPGPWRLPVIGSLHHLASSPLAHRVMADLARRLDAPLMYLKLGEVSVVVASSPEAAREVMKTYDVALASRPWNPTIKIMMSDGQGLVFGRYGALWRQLRKICILELLSARRVQSFRQIREDEVGRLVAAIAAAPPGQLVNVSERIAVLITDSAVRTMIGDRFQRREEFLQVLEEGVKLVTGFSLGDLFPSSWLANFISGTARMAEEVHRKSFELMEYAIKQHEDKRAVGDGEDLVDVLLRIQKEGGLEVPLTMGIIKASILDLFSAGSETSATTLQWAMSELMRYPNVMQKAQAEVRDCLGEKHMVTEDDLADLKYLRLVIKETLRLHPPAPLLIPREAMESCKILGYDVPKGTTVLVNAWAIGRD…
160	164	chr6	124925411	124928148	1			chr6_124927717_1	chr6_124927717_1_Aegilops_tauschii	CYP71X41_6D_Triticum_aestivum(wheat)	99.8	503		CYP71X41	MEQWAYYHCLFLALLLPLLLLKLNSKRGGVRLPPGPWRLPVIGSLQHLAGNPLVHRVMADLARRLDAPLMYLKLGEVPVVVATSPEAAREIMRTHDVVFATRPWSPTVKIMNAEGQGLIFARYGALWRQLRKICILELLSARRVQSFRHIREDEVGRLLAAVAAVPPGEPVNVSERIAVLITDSAVRAMIGDRFKRREEFLQTLDEGVKLVAGFNLGDLFPSSRLASFISGTARLAEENHRKSFELMEYAIQQHEQQRAAASANDDGGEDLVDTLLRIRKEGGLDVPLTMGMIKAVILDLFGAGSETSATTLQWAMSELMRYPNVMRKAQAEVRKNLQGKHKVTEDDLANLKYLRLVIKETMRLHPAAPLLLPREAMEPCKILGYDIPKGTTVLVNAWA…
161	165	chr6	168063831		-1		100% to CYP71X43_U	chr6_168064187_-1	chr6_168064187_-1_Aegilops_tauschii	CYP71X43_U_Triticum_aestivum(wheat)	96.68	512		CYP71X43	MAMQQLVCWLCAFLALLLLKLIKKRGARTTAPALKLPPSPSSLPFIHNLHHLLRSPIAHRAVADIARELDAPLMYLQLGELPAVFVSSADAAREMMKVHDMKFAWRPYPPTIQKLRPMGKGIFFAPYGALWRQLRKISIVKLLSVRRVHSFHRVREEEAGRLVAAIAATPPGETVNLCEQIFWVIADSTMRTMIGERFERRDEFLVVLADIVKIASGFTMAEWFPSSWLVRAFGGTRRRGHRGYLTTYKLVENAYRQRQKRKEAMAAPSTRNAVTGEEEDLMDELMRIHEEGDLEVPLTIGNIKAVTIDLFGAGTETSSDALQWAMSELMRNPRVMQKAQAELRDKLRGKPTVTEADLADMTYLKLVVKETLRLHPALPLLVPRECNESCKIMGYDVPK…
163	166	chr6	124914960	124916908	1			chr6_124916480_1	chr6_124916480_1_Aegilops_tauschii	CYP71X44_6B_Triticum_aestivum(wheat)	95.45	505		CYP71X44	MEQRAYYLCLFLALLLPLLLLKLNSKHHGVRLPPGPWRLPVIGSLHHLAGNPLVHRVMADLARRLDAPLMYLKLGEVPVVVATSPEAAREIMRTHDVVFATRPWSPTMKIMNSEGEGLVFARYGTPWRQLRKICILELLSARRVQSFRHIREDEAGRLVAAVAAVPPGEPVNVSERIAVLITDSAVRAMIGDRFKRREEFLQTLEEGVKLATGFNLGDLFPSSWLANFISGTARLAEENHRKSYEVMEYAIKQHEEQRAAASANGDVEEGEDLVGALLRIRKEGGLDVPLTMGMVKGVILDLFGAGSETSATTLQWAMSELMRNPNVMWKAQAEVRDNLQEKPKVTEDDLINLKYLKLVIKETMRLHPAAPLLLPREAREPCKILGYDVPKGTTVLVNA…
162	167	chr6	25899564	25901938	-1	pseudogene		chr6_25899993_-1	chr6_25899993_-1_Aegilops_tauschii	CYP71X45_U_Triticum_aestivum	99	506	2 aa diffs	CYP71X45P	MEQSAYCICLFFALLLPLLLLKLNSKRGSVRLPPGPWRLPVIGSLHHLAGNPLVHRVMADLARRLDTPLM*LKLGEVPVVVATSPEAACEIMRTHDVVFATRPWSPTMKIMVSEGEGLVFARYGTLWRQLRKICVQELLSARRVQSFRHIREDEVSRLVAAVAAVPPGEPVNVSERISVVIADSAVRAMIVDRFKRREEFLQSLEEALKLATGFNLGDLFPSSWLANFISGTARLAEENHRKNFELMEYAIKQHEEQRSAASANGGVEEGVEDLVDTLLRIRKEGGLNVPLTMGTVKAVILDVFDAGSETSGTTLQWAMSELMRNPNVMQKVQAEVRDNLQEKPKVTEDGLSNLKYLKPVIKETMRLHLGAPLLLPREAREPCKILGYXXXXGTTVLVN…
165	168	chr1	474806433		-1			chr1_474806433_-1	chr1_474806433_-1_Aegilops_tauschii	CYP71Y16_1D_Triticum_aestivum(wheat)	99.81	530		CYP71Y16	MTKSRSNAGSSACSDPRSRMEDAYVVVYLGVALVSLLVVLAGRRRWGARGDGAADGLRLPPGPWQLPVIGSLHHLALAGQLPHRAMRDLARRHGPAMLLRLGEVPTLVVSSRKGAREVMRTHDTAFATRPLSATMRVLTNGGRDIIFAPYGDYWRQLRKIAVAELLTARRVLSFRAIREEEVAAALRGVAEAAAAARPVEMRVLLAALVADSTVRAVLGDRCRERDAFLRALDRSMQLAAGFNPADLWPSSRLAARLSSAVRRAGECRDTVYGILDGVVQEHLERMSGGGGHDEDLLYVLLRIQKEGALQFPLDMDVIKSVIFDVFGAGSETSATTLEWAMAELVKNPRVMQKATAELRQTFHARGTVTEHALTELTYLHLVIRETLRLHTPLPLLLPR…
169	169	chr3	42718334		1			chr3_42718334_1	chr3_42718334_1_Aegilops_tauschii	CYP71Y23_3D_Triticum_aestivum(wheat)	99.15	472		CYP71Y23	MGQPPGPWTLPVIGSLHHIAGQLPHRALRDIARRYGWPVMLLHLGEVPTLVVSSRSGAREVMKTHDAAFASRPLSSTVRVLTNGGRDIIFAPYGDHWRMMRRIAVTELLTARRVLSFRAIREQEVAAMLRAIAAGGEEVDMRTRLSAMVADSTVRAVMGDRCRDRDVFLREVDRANELGRGFNLADLWPSSRLLVWASGAVRRAEECRDAVFGILDGIIVEHLERMDGVGDDDQDLIDVLLRIQKDGGSGLDMDSLKAVIFDIFAAGSETSSTTLEWIMAELVKNPKVMHRVTTEVRQAFGAGGTVVEEQLANLVPYLQLVIRETLRLHTPLPLLLPRECREEAGCRVLGYDVPQGTQVLVNAWALSRDERYWPDAPEEFRPERFEKSEVDFRGADFEL…
170	170	chr4	374645723		1			chr4_374647122_1	chr4_374647122_1_Aegilops_tauschii	CYP71Y25_4D_Triticum_aestivum(wheat)	99.13	458		CYP71Y25	MQMEVVYLGVALVSLCAVLLSSRRRRRSAMNELPGPWQLPVIGSLHHLVGQLPHRAMRDLARRYGPVLLLRLGEVPTLVVSSREGAREVTKTHDLAFATRPLSATARVLTNGGRDIVFAPYGDHWRQVKKIAVFELLSARRVTSFRAVREEEVAAVLRDVAEAAVATRPVELRACLSALGIDITVRAIMGDRFKERDVFLHALDRSTKLVAGFNPPDLWPSSRLAGYLSGAVRSAKECRDIGNGILDAIIKERLERTMEGGGGQKNEDLLDVLLSMHKEGKLDMDAVKYVIFDLFSAGSETTTLEWAFAELMRNPKVMHKATAEVRRAFRAQGTVAEHRLNELPYMHLVIREALRLHMPTPLLLPRECREPCQVLGYDVPQGTQLLVNVWALGRDKRYW…
171	171	chr4	2063448		-1			chr4_2063448_-1	chr4_2063448_-1_Aegilops_tauschii	CYP71Y26_4D_Triticum_aestivum(wheat)	99.81	516		CYP71Y26	MLYKSKHATSQFAISPAIRARTAGMQMEVIYLGVALVSMSIVLFVARCSRKANEPPGPWQLPLIGSLHHLALSRQLPHHAICELARRHGPVMLLRLGEVPTLVVSSREGARELMKTHDLAFATRPLNATMRVLTDGGRDIVFAPYGEYWRQLRKIAVSELLSASRVLSFRAVREEEVAFMLRDVAQAAAAGRPVELRARVSALVTDITARTVMGDRRFKERAVFLSALDRSAKLSAGFNPPDLWPSSRLVGCLSGAVRRAKECSDIGNGVFDAIIRGRTMGGQKEHNLLDGLLSMHKEGRIDMDTVKYVVLEVFSVGNDTTATTLEWAITELVKNPKVMQKATAEVRQAFEACGTVAEHALGKLPYMHLVIRETLRLHTPVPLLLPRQCQEPCQVLGYD…
172	172	chr4	515595870		1			chr4_515597029_1	chr4_515597029_1_Aegilops_tauschii	CYP71Y27_4D_Triticum_aestivum(wheat)	99.8	512		CYP71Y27	MHVPATVASLYRMQMEAVYLGLALVSLCIVLLSRRARRWSASNEAPGPWRLPVIGSLHHLIGQLPHRAMRDLARRHGPVMLLRLGEVPTLVVSSPEAAREVMKTHDMLFATRPLNSTMSVLTNGGRDIVFAPYGDHWRQLRKIAVLELLSPGRVLSFRAIREEEVAAMLHDVADAAAAARPVELHACLSVVVSNITVRAVMGDYRFKQREEFIRALHHSQKLAAGFNPADLWPSSRLAGWLSGGLRRAKEIRATGNGILDTIIRERLERTTEGGGGENKDHHLVDVLLSMHKEGRLDMDAVKNIIFDIFSAGSETTVIEWAMAELMRNPEAMRKATAEVRRALEARGSVEEHALGELPYLHLVIREVLRLHAPTPLLIPRECREPCQVLGYDVPRGTQV…
176	173	chr5	487249523		-1	pseudogene		chr5_487249523_-1	chr5_487249523_-1_Aegilops_tauschii	CYP71Y28_5B_Triticum_aestivum(wheat)	85.11	497	same seq with one indel and a few diffs	CYP71Y28P	MMILTARLYMKPLTYILIGHSRQDNEVVYLVLAIGSLLVVLLAWRRGRGAAADGKDKLRLPPGPWTLPVIGSMHHIVGALPHRAMRDLARRHGWPVMLLWLGEVPTLVVSSREAAREVMKTHDASFATRPLSSTMRVLTKGGRDIVFAPYGDYWRQMRRIAVTELLTTRRVLSFRAIREEEVAAMLRAVASAGDGGAVVDMHARLSALVADSTLRVVIGDRCSGRDVFLRELERSIGLVAGFNPADLWPSSRLAAWASGAVRRAEECRDTVFXxxDMFGAGSETSTTTLEWIMPELVRNPKVMHRATAEVRRAFEAGGKVVEQQLDELVPYLHLVIRDTLRLHTPLPLLLPRECREEPACRVLGYDVPKGT*VLVNAWALGRDERYWRDKPEEFRPERF…
173	174	chr7	617986486		1			chr7_617987834_1	chr7_617987834_1_Aegilops_tauschii	CYP71Y29_7D_Triticum_aestivum(wheat)	99.42	516		CYP71Y29	MEDVVYLVLALASLLVVLLARRWRRSSPDSEDKLRLPLGPWTLPVIGSMHHIAGALPHQAMRDLARRHGWPVMLLRLGEVPTLVVSSREGAREVMKTHDAAFATRPLSSTVRVLTNGGRDIIFAPYGEHWRQMRKIAVTELLTARRVLSFRAIREEEVGAMLRAVASAAGEGEAIDMRARLSVLVADTTVRAVMGDRCKDRDVFVRELDRSIGLAGGFNPADLWPSSRLAVWASGAVRRAEECRDIVFGILDGIIAEHQQRMGTVDGDDEDLIDVLLRVQNDGSLQLPLDMDSIKAVIFDIFGAGSETSATTLEWIMAELVKNPKVMKRATAEVRRAFEAGGKVVEQKLGELVPYLHLVIRETFRLHAPVPLLLPRECREEPACRVLGYDVPRGTQVLV…
166	175	chr1	474798683		1			chr1_474798683_1	chr1_474798683_1_Aegilops_tauschii	CYP71Y17_1A_Triticum_aestivum	93	427		CYP71Y32	MVAAYLVIYLGVAFTSLLIVLSGRRRWAARGDGCHDLRLPPGPWQLPVIGSLHHLVLAGQLPHRAMRDLARRHGPAVLLRLGEVPTVVVSSREGAREVLKTHDKAFATRPVSATMRVLTSGGRDIVFAPYGDYWRQLRKIAVVELFTARRVRSFRAIREEEVAAALRGVAEAARPVEMRALLAARVADSTVRAVIGDRCRERDALLRELDRSMQLAAGFNPADLWPSWRLAARLSGAKECHDTVHGILDGIIKEHLERMDGGEDLLDVLLRIQKEGALQFPLDMDAIKSVIMDILGAGSETAATTLEWAIAELVNNPRAMHKATAEVRRAFHARGTVAEQDLRELTYLRLVIWETLRLHPPLPLLFRECQKPCQVLGYDVPRGTQVLVNAWALGRDEHS…
167	176	chr3	42684506		1	pseudogene		chr3_42684506_1	chr3_42684506_1_Aegilops_tauschii	CYP71Y23_3D_Triticum_aestivum(wheat)	89.55	134		CYP71Y33Pa	PLLLPRQCREEAGCCVLGYDVPQGTQVVVNAWALGRDERYWPDSPEEFRPERFETSEVDFRGPDFELLPFGAGRRMCPGLAFGLANVELALASLLLHFDWETPGLDDPTGFDMTEAFGLTTRRKNGLVLRPVLRVPLSGV
168	177	chr3	42686313		1	pseudogene		chr3_42686313_1	chr3_42686313_1_Aegilops_tauschii	CYP71Y23_3D_Triticum_aestivum(wheat)	89.55	134		CYP71Y33Pb	PLLLPRQCREEAGCCVLGYDVPQGTQVVVNAWALGRDERYWPDSPEEFRPERFETSEVDFRGPDFELLPFGAGRRMCPGLAFGLANVELALASLLLHFDWETPGLDDPTGFDMTEAFGLTTRRKNGLVLRPVLRVPLSGV
174	178	chr5	487160508		1			chr5_487160508_1	chr5_487160508_1_Aegilops_tauschii	CYP71Y28_5B_Triticum_aestivum(wheat)	83.76	394		CYP71Y34P	APYGDYWRQMHRIAVNELLTTRRVLSFRAIREEEVAAMLWAVASIGDGGAVVDMHARLSXXXXRDVFLRELERSIGLVAGFNPADVCRSSRLAAWASGAVHCTKECRDTVFGILDGIIAEHQERVGAGAGDAEDRIQKDGGLQFPLDMDCIKAVIFDIFGAGSETSTTTL*WIMAELVKNPKVMRRATMEVRRAFEAGGKVVEQQLGELVPYLHLVIRETLQLHTPPLLLPRECREEPACRVLGYDVPKGTQVLVNAWALGRDERYWPDKPEEFRPERFEPAGDGKDGAAVEVDFKGVDFEFLPFGAGRRMCPGMAFGLANVELALASLLLHFDWEAPGPNGSLDMTEAFGITARRKAGLLLRPIMRLPVPDNLTS
175	179	chr7	618023038	618024181	-1			chr7_618023038_-1	chr7_618023038_-1_Aegilops_tauschii	CYP71Y29_7A_Triticum_aestivum(wheat)	92.07	517		CYP71Y35	MEDIVYIFLALGSLLVVLLTRRGRRTSADGEDKLRLPPGPWTLPVIGSMHHIAGALPHRAMRDLARRHGWPVMLLRLGEVPTLVVSSREGAREVMKTHDAAFATRALSSTVRVLTNGGRDIVFAPYGEHWRQMRKIAVTELLTSRRVLSFRAIREEEVGAMLRSVASAAGNGDVIDMRARLSALVADSTLRAVIGDRCNDRDVFLRELDRSIGLAGGFNPADLWPSSRLAVWASGAVRRAEECRDTVFGMLDGIIAEHQQRMGTVDGDDEDLIDVLLRVQNDGSLQLPLDMDTIKGVIFDIFGAGSETSATTLEWIIAELVKNPKVMHRATTEVRRAFEAGGKVVEHQLGELVPYLHLVIRETFRLHTPLPLLLPRECREEPACRVLGYDVPRGTQVLV…
177	180	chr3	604835825		-1			chr3_604835825_-1	chr3_604835825_-1_Aegilops_tauschii	CYP71AA15_5A_Triticum_aestivum(wheat)	76.98	517		CYP71AA17	MAETQHTQLVCYTLLCILLVAIVVKLKLKLRRGAGRLNQLPPGPWALPVIGHMHLLLGAIPHQAMHRLARRHGPVMLLRLGHVPTLVLSSAEAAREVMKVHDAAFADRPVYATANIFTYGGEDISFARHDSRHWKALRKLCAVELLSPRRVRSFRRVREEEAARLVRSVADAGPVVNVGDMLKVMMNDVVMRASVGDRCAQRDAYLEELDRVLDLMSGFNFIDLFPASRLARAIGGRALGATWEVHRRIHSIMDAMISDHRTAMEGEDDNDAGREQRGDVLTTLLRFQRDGGIGGVALTNENISGVLFDLFAAGSETTATTTIWAMSELMRSPHIMAAEQSEVRQVLHGKTEVTEADIDGRLHYLHMVIKETFRLHPPVPLLMPRLCTEQTKVMGYDIP…
178	181	chr5	487170524	487171722	-1			chr5_487170524_-1	chr5_487170524_-1_Aegilops_tauschii	CYP71AA15_5D_Triticum_aestivum(wheat)	99.61	515		CYP71AA15	MAETTPLQLACYTLLCVLVVTIVLKLKLKIRVRPASAGRLNLPPGPWALPVIGHMHFLLGALPHQAMRSLARRHGPVMLLRLGHVPTLVLSSEEAAREVMKVHDAAFANRPVYATADVLTYGGQNISFARLDSRHWKTARKLCTVELLSPRRVRSFRPIREGEAARLVRSVGDAGATVNVSERVKVMMNDVIMRVSVGDRCQQRALYLEELDKGLDVLSGFNLTDLFPTSRLARVLGGGSVRAAWEVRERIQSILDAMVEDHKRAMESEEAAGAGAGHENEDILTTLLRFQRDGGMGGITLTNENVNGVLFDIFSAGSETTATTTVWAMSELIRNPRTMAIAQSEVRRVLQGKTKVAEADIDGQLHYLQMVIKETFRLHPPVPLLLPRLCTEQKKIMGY…
179	182	chr7	597137144		1			chr7_597138345_1	chr7_597138345_1_Aegilops_tauschii	CYP71AA16_7D_Triticum_aestivum	90	447	3 aa diffs and one indel	CYP71AA16	METTPIQLVSYTFLCVLVVTVLLKLRSASGSRPNLPPGPWALPVVGHMHFLLGALPHQAMRSLSRRHGPVMLLRLGHVPTLVLSSAEAARQLMKVHDAAFANRPVYTPADVFTNGGQNISFARHDSRHWKAVRKLCTVELLSPRRVRSFRPVREEEAARLVRSVADAGALVDVGERVKVMMNDVIMRVSVGDRCQQRALYLKELDRAIDLMSGFNLTDLFPTSRLARVLGSRSPRATWEVHGRIQSIMDAMVHEHKMAMGSEEASAGHEREDILTTLLRFQRDGGMGGIALTNENVSGVLFDVFSAGSETTATTTIWAMPELIRNPRIMAIAQSEVRRVLQGKTKVAEADIDGRLHYLQMVIKETFRLHPPVPLLIPRLCTEQRKIMGFDVPPGTTVFA…
179.1	183	chr1	10100062	10101192	1	missing most of last exon		CHR1_10100062_1	CHR1_10100062_1_Aegilops_tauschii	CYP71AB16_1D_Triticum_aestivum(wheat)	99.67	304		CYP71AB16	MEDDASYFMLLVLALVPLVYIIRFYYLASSRCHNRGLRLPPGPWQLPVIGSLHHLFGALPHRALRDLSRRHGPLMLLMFGTNRPVIVVSTAKAAKEMMKTHDTTFCARPLTSALKAISKHGLGIVFAPYGDHWRQMRKICFLELLSAKRIATFSSIRGEETDRFIRSIVATLEPVVNLSELLAAYLTDTTVHMIMGGQFTEQETLLRHVDEAVGIVSGVALPDLFPSSRLARALSTTLRSAEVFREAFLALMGHAIDDHLESRRSASSSEQVDQEDIIDVLLRVQGEGNLEPPLTMNNIKAVVFXXXXSLLFHFDWSLPDGTLPSELDMTETMGVAARKKVPLWLRPTPHVYLP
180	184	chr2	24579869		1			chr2_24579869_1	chr2_24579869_1_Aegilops_tauschii	CYP71AB18_2B_Triticum_aestivum(wheat)	91.54	508		CYP71AB18	MEFYYHILLALVPLLYLLIRWFRRHRGLRLPPGPWQLPVIGSLHHLGGDLPHRTIRDLSRRHGPVMFLKLGGIPVVVASSREAAEDVMRTNDAVLASRPQTPTVKLLTKQRHDIVLAKNGEHWRQLRKICVHELLSARRVQSFRPIREQEAMRLVQAVAASSAASDSDSVNLDKLLAAHVNDVIVRAVVGDGEVDDRETLLRLIAKAIELVGSFRLADIFPSSRIARALSSRAMHRVEVYVDEIFTFMDGIISQHMDRRSSMPHQNQHPDKDLIDVLLRVQEENSLRLPISKGTIKGVLFDLLSAGSETATSVLCWAMAELMRNPAIMSRAQSEVREAFVGQMKVTEEGLGKLSYLQCVIKETLRLHTPGPFGLPRESQEACRVMGYDVPKGTMVLVNA…
181	185	chr7	630022918		1			chr7_630024092_1	chr7_630024092_1_Aegilops_tauschii	CYP71AB21_7D_Triticum_aestivum(wheat)	100	503		CYP71AB21	MENDAYFYLLALLPLLYLIRLYRASFGPHNHGLRLPPGPWQLPVIGSLHHLFGALPHRALRDLSQRHGPLMLLKFGENPVIIASSAEAAKEIMKVHDSIFCTRPLSSSVKVMNELGRGIAFAPYGDHWRQMRKICFLELLSTKRISSFQAIREEEATRLIRSVSSASQLEVVVNLGKMLAMYVTDTTVHAIMGGRFKEQDTLLHYVDEAVRLVGGFSLPDLFPSSRLALALSSTLRKSRVFRDSLMAFMDRVIGEHLERTSSDEQHQEDLIDVLLRIQREGNLQSPLTMDSIKAVIFDLFAGGSETATTTLQWAMAELMRNPSVMSRAQAEVRAAFMGQMKVSEEGLGELSYLQCIIKETLRLHTPGPLLMPRECQEHCKILGYDVPKGTTVLVNAWAI…
182	186	chr7	72511325	72512506	-1			chr7_72511325_-1	chr7_72511325_-1_Aegilops_tauschii	CYP71AB22_7D_Triticum_aestivum(wheat)	99.15	473		CYP71AB22	MDNDAYYYLLVALFPLVYLMMIYRGSLTSSNGALRLPPGPWQLPVIGSLHHLLGALPHRALRDLSQRHGPLMLLRFGEVPVIVASTAEASKEITKTYDHIFCTRPLSASAKVLSERGKGIAFAPYGGEWRQLRKICILELLGARNITSFRPIREEEVTRLIRYIVDDSSESSEVVNLSKMLATYVTHATVHCIMGGRFKEHDTLLHYVDEAVEVVGGFTLPDLFPSSRLVRALSGTLHRAEVFRDSVLAFIGHVIDEHLDRRSSEEAHQEQDIIDVLLRIQRDGDLQFPLTMDNLKVVIFDLFAAGSEAPATILQWAMAELMRRPSTMSRAQAEVRGAFMGQKKVTEEGLGELSYLHCIIKETLRLHPPGPFLLPKQCQEQCKILGYDVPKGTTVLLNA…
183	187	chr1	366163037		-1			chr1_366163037_-1	chr1_366163037_-1_Aegilops_tauschii	CYP71AD7_1D_Triticum_aestivum(wheat)	94.47	398		CYP71AD7	MELAALLLLLPFLLAGLLYLGKKDGGVDARRLPPAPRGPPVIGNLHQVGALPHRALRALAAARGAPHLMRLRLGQVPALVASSPAAAAELMRAHDHAFATRPYFRTAEILTYGFRDLVFAPHGEHWCHVRRLCSQHVRSAARSHRHSAMREREVAALVQAVADHASSSAAAVVDVSGALYRFANDVICRVVSGTRLSREEEGGGRSELFRELIEENTALLGGRWDELLEKVVVEHEGGRSGAGMEEEEEDFVDVLLALREDGHGQDGFELSRDIIKSLLADMFAAGTETTYIALEWAMSELMKNPAAMRRLQQEVRSAAGGIAKADALGAGTPYLKAVVKETLRLHPPVPLLLPRECMQDATVLGYHVAEGTRVFVNAWAINRDPGSWHAPDDFLPERF…
193	188	chr3	37248603		1			chr3_37248603_1	chr3_37248603_1_Aegilops_tauschii	CYP71AF9_3A_Triticum_aestivum	97	523		CYP71AF9	MLPTKELVGQDLQYSYYHYLVFSAILLLPLLVLKLRLRQRKDKDVNNPPPGPWRLPVIGSLHHLVSLAGALPHHVMRDLAGRHGPLMLLRLGELPLVVASSADAAMAVMKTHDAAFATRPQTATLRALTKDGLGVIYAPNSDHWRQLRKLVTTELLSARRVKGLRVTREAEVSSLVASIASSASSRSCKDPVNLSSLLSRFVTDVTTRSVVGDWITEREAYLEAKRQVVKMAAKFSLADLFPSSRLARMCSGGVRQAEACNREINRIMSKVIEDHRARRSAGTGGKEEVILDVLLRTQIDGVPLDMGTIRAVILDLFAAGSESFATTLEWALAELIRNPTTLHKAQSEVRRALAGHTRVSEDALRDLPYLHLVIKETLRLHPTGPLLLPRECREPCRVL…
184	189	chr6	121228012	121229077	-1		100% to CYP71AF11_6D	chr6_121228012_-1	chr6_121228012_-1_Aegilops_tauschii	CYP71AF11_6B_Triticum_aestivum(wheat)	95.73	515		CYP71AF11	MANQEAHHHYHHYLVLAIILVLPLLLLVKLRPRKHGGENPPPGPWQLPVIGSLHHLVGALPHRAMRDLAHRLDAPLMLLRLGELRVVVASSAGAAREVMKTHDAAFATRPRTATIRALTRDGLGVAFAPHGAHWREIRKLCVTELLGARRVRSLRGSREAEAASLVASVVASLAASASEPVNVSTLLATYVTDAVVRAVVGDRIGDLRDEFLDRLDEGVKVAAGFSLADLFPSSRLARAFSGAARRAEAHSREMSRLMDGIIAEHRERKRTAGAGDDDRDLLDVLLRIQADGGLRAPLDIGTIRAVITDLFGAGSETSATTLQWAMAELMRSPAALRRAQAEVRGALPGESRVREEVLPELRYLHLVIKETLRLHPAVPLLLPRECTEPQSMLGHDVPK…
185	190	chr7	618212010		-1			chr7_618212010_-1	chr7_618212010_-1_Aegilops_tauschii	CYP71AF12_7D_Triticum_aestivum(wheat)	99.8	505		CYP71AF12	MAQQDQDVIMYYRNGLLLAAALLVPLLLLVRLRRPRGENLPPGPWRLPVIGSLHHLVGRLPHRFMRDLARRYDAPLILLRLGELDVVVASSADAAREVLKTQDAVFATRMQTPTIRALTVDGAGIALAPHGEHWRQARKLGVTELLGARPVQSLRGSREAGVAALVASIASASAASGPVNVSSLLSTYIIDVAVRALVGDRIGGDLRGEFLERLGEGVRLATGFGLADLFPSSRLVRAFSGSLGRLEALGRETSRVMDRIIDKHQHAGDEEKDFVDVMLRIQKNDGSLRAGTIRAMITDLFGAASDTSATTLEWAMAELMGSPAALRRAQAEVRSALAGESRVREEALPDLHYLRLVLKETLRLHPAAPLLLPRECPESRHVLGYTVPKGAMVLVNAWA…
186	191	chr7	617896621		1			chr7_617896621_1	chr7_617896621_1_Aegilops_tauschii	CYP71AF13_7D_Triticum_aestivum(wheat)	98.68	531		CYP71AF13	MFRWREEEMHSSQAMAQQELDVTYYYNYLFMATVLLLPILLMAMFRPPRKHDGENLPPGPWRLPVIGSMHHLVGALPHHAMRDLARRYNAPLMLLRLGEVDVVVASSASTAKEIMKTHDATFATRPRTATLRAITRDDLGISLAPHGEHWRRLKKLCVTELLSTRQVRSLRGCREANAAALVSSIVSSLSSSSEPVNVSSLLSTHVTNFAVHAVVGNRNGDLRDEFLKVLDEGVKLAAGFSLADLFPSSRLARVFSGSTRRLEEISHELSQVIDGIIEDHRTRRSAGAGDEEEDLVDVLLRVQNDGSLHVPLDVGNMRAVITDMFSGGSETSATTLEWAMAELMRSPVALRRVQAEVRGALMGESCVGEDALKELHYLHLVIKETLRLHPVVPLLPREC…
187	192	chr7	617903375		1			chr7_617903375_1	chr7_617903375_1_Aegilops_tauschii	CYP71AF22_7D_Triticum_aestivum	99	531		CYP71AF22	MPGCGEEKTHSPAMSQQDQDVVCYYNYLFMATLLLLPFLLIAMFKPPRKDSGENLPPGPWRLPVIGSIHHLIGALPHHAMRDLARRYDAPLMLLRLGELNVVVASSAIASREIMKTHDAAFATRPRTATLRAITTDDLAISLAPHGEQWRRLKKLCVTEVLNTRQVRSLRGCREANAAALVSSIVSSLSSSSEPVNLSSLITTHVTNLAVHALVGERNEDLRAEFLECLDEGIKLASGFSLADLFPSSRLARAFSSSIRRMEALNNQISQLIGRIIEEHRMRRSAGGGDEEEDIVDVLLRIQNDGSLHMPLNARTIGSVIMDMFSGGSETSVTTLQWVMAELMRSPAALQRVQAEVRSAFAEQTCIKEDALQELRYLHLVIRESLRLHPVLPLLLPREC…
188	193	chr7	617904589		1	pseudogene		chr7_617904589_1	chr7_617904589_1_Aegilops_tauschii	CYP71AF22_7D_Triticum_aestivum	98	210	no upstream exon 1, same as chr7_617903375	CYP71AF22P	DMFSGGSETSVTTLQWVMAELMRSPAALQRVQAEVRSAFAEQTCIKEDALQELRYLHLVIRESLRLHPVLPLLLPRECQETCRVLGYDVPKGAMVLVNAWAIGRDIASWGADAEEFRPERFEEAGDAAADFRGTNFELVPFGAGRRMCPGITFGIAVVQVILANLLFHFDWELPGGGADGLDMAEELGMTARRKNDLWLHATVHVPAPNP
189	194	chr7	617845417		-1	frameshift near N-term, possible pseudogene		chr7_617845417_-1	chr7_617845417_-1_Aegilops_tauschii	CYP71AF15_7D_Triticum_aestivum(wheat)	100	432		CYP71AF15	MATTGNHRHLPLLLLVKLSSGDVASTLAGMPLNPPPGPWQLPVIGSLHHLVGALPHHAMRDLALRHGPLMLLRMGELPVVVASSAAAAKEVMKTHDAAFATRPRTDTTASLTADGLGIALAPHGEHWRAVRKLCATELLGAPRVRTFRGTREAEAAALVASVAAEAASGAAVNVSSLVATYVADAAVRAVVGDRIADRDAFLACLDEAVRVAAGFSLADLFPSSRLARALSGTARRVETVFGEMSRLMDAVIKEKRARKAAGVGREEEEDILDVLLDGGGGAPLDIPTIRAVIRDLIGAGSETSASTLQWAMAELMRNPTALRRAQAEVRGALAGQSRVGEDSMHELPYLRRVIKETLRLHAVAPLLLPRECREPSRVLGYDVPQGAMVLVNVWAIGRD…
190	195	chr7	617809240		1			chr7_617810275_1	chr7_617810275_1_Aegilops_tauschii	CYP71AF16_7B_Triticum_aestivum(wheat)	86.52	512		CYP71AF23	MAANHEKHGLLLAAAILLLLLFLLAKLRRRRKKYGGVPLNPPPGPWQLPVIGSMHHLVGALPHRAMRDLALRHGPLMLLRMGELPVVVASSAAAARDVLKTHDAAFATRPRTNTIATLDGDGLGFALAPYGDHWRRVRKLCVTELLGAPRVRSFQGTREAEAAALVASVAAAAASGDVVNVSSLVSTYVVDAAVRVIVGDRIAGRDAFLACLEEGLRLSSGFSLADLFPSSRLARALSRRSRQVEAAAQEMSRVMDGVIEEKRARKAAGNGMGREEEQDILDVLLDGGGTAPLDIGTIRAVVRDLFGAGSESSASTLQWAMAELMRRPAALRRAQAEVRGALAGQSRVREEALQELPYLRLVIKETLRLHATVPLMLPRESREATRVLGYDVPQGTMVL…
191	196	chr7	632996523		1			chr7_632997579_1	chr7_632997579_1_Aegilops_tauschii	CYP71AF17_7D_Triticum_aestivum(wheat)	100	509		CYP71AF17	MAGNHENHGLLLAGAILLLTLLLVVKLRRRSKQYGGVTLNLPPGPWQLPVIGSMHHLVGALPHRAMRNLALRHGPLMLLRMGELPVVVASSAAAAMEIMKTHDVAFATRPRTNTTVSLTGDGLGIALAPHGDHWRRVRKLCATELLGAPRVRSFRGTREAEAAALVASVAVEAASGAAVNVSSLVATYVADAVVRSMVGDRIADREAFLACLCEGVRVAAGFSLADLFPSSRLARALSGTARQVEATVREMSRLMDGVIEEKRARKAAGAGCEEEEDILDVLLDGGGGGAPLDIGTVRAMMRDLFGAGSETSASTLQWAMAELVRKPAALRRAQAEVRSALAGQSRAREEALQELPYLRLVIKETLRLHAAVPLLLPRECREPSRVLGYDVPQGTMVLV…
192	197	chr7	632999645		1	pseudogene		chr7_632999645_1	chr7_632999645_1_Aegilops_tauschii	CYP71AF17_7D_Triticum_aestivum(wheat)	100	76		CYP71AF17P	RGTDFQLVPFGAGRRMCPGITFGLAVMEVALASLLFHFDWELPGGTEELDMAEAFGITARRKSDLWLHATVVVPPL
194	198	chr5	422723185		1			chr5_422723185_1	chr5_422723185_1_Aegilops_tauschii	CYP71AK13_5D_Triticum_aestivum(wheat)	99.8	503		CYP71AK13	MSPYAVLAAVLLAFCYAVWKARGGGGSSRLPPSPPSRPLLGHLHLLGRLPHRSLRDLHARYGTDGGLLLLQLGRRRTLVVSTAAAAADLYKNHDLAFASRVPSAPVDKLTYGSINVSFSPYGDAWRRSKKMAVVHLLSPRRVDSFASVRAVEVAALVAGARRAAEAGEIVELRELLCAYSNAVVTRATTGAAGATAEKLKQLLGNSAAFMSGLQAEDVLPGAAAKVVRWATGLEKRLDAELELWDKFLSETIAEHLEKKKCDGSAGEEDFLDVLLRLREEGTAGLELTDDRIKSIIKDIIAAGTDTSSLTLEWAMAELVGNPQAMAKLQDEVTRATEGKPTIEEDDLRRMEYLKAVLKEVLRLHPAAPLLVPHQSTTTAVVQGYEIPAETALFVNAWAI…
195	199	chr5	423146199		1			chr5_423146199_1	chr5_423146199_1_Aegilops_tauschii	CYP71AK14_5D_Triticum_aestivum(wheat)	100	504		CYP71AK14	MCPYFVLVAGVAALLAFSCVVIRKARGSSSSKLPPSPPSRPLVGHLHLMGSLPHRSLRELHARYGTDGGLLFLRLGRRPTLVVSTAAAAADLYKNHDLAFASRVPSVPVDKLTYGCMNVSFAPYGDAWRRSKKMAVIHLLSPRRADSFAPVRAAEAAALVAGARRAAEAGEAVELRELLYAYSNSVVTRAAAGAAGATAEKMKELMGNSAAFMSGLQAEDVLPGAAAKMVRWATGLEKRIDVQVEAWDKFLSEIMAEHVEKKRDDGAEEDFLDVLLRLRKEGTAGLELTDNRIKSIIKDMIFAGTETSSITLEWVMAELIGNPRVMAKLQDEVTRIANGKPAIEEDDLRRMEYLKAVLKEVLRLHPPAPLLVPHESTAAAVVQGYEIPAKTALFINDWA…
196	200	chr5	422702986		1			chr5_422702986_1	chr5_422702986_1_Aegilops_tauschii	CYP71AK15_5D_Triticum_aestivum(wheat)	99.6	501		CYP71AK15	MSPYAVLVAVLLTFCYVVWKARGSRSGKLPPSPPSRPLLGHLHLLGRHPHRSLRELHARYGTDGGLLLLQLGRRRTLVVSTAAAAAGLYKNHDLAFASRVPSAPADKLTYGSTNVSFAPYGDAWRRSKKMAVVHLLSPRRADSFAPVRAAEAAALVAGVRRAAEAGEIVELRELLSAYSNAVVTRATTGAAGATAEKLKKLLGNSAAIMSGLQADDVLPDAAAKVVRWATGLEKRLDAELEQWDKFLSEIIAEHLEKKPDNGAGEESFLDVLLRLREEGAAGLELTNDRIKSLIKDMIAGGTDTASVTLEWAMAELVGNPRAIAKLQDEIDRVTEGKPTIEEDDLSRMEYLRAVLKEVLRLHPAAPLLIPHQSTTAAVVQGYEIPAETALFVNAWAIGR…
197	201	chr5	476159712		1			chr5_476159712_1	chr5_476159712_1_Aegilops_tauschii	CYP71AK16_5D_Triticum_aestivum(wheat)	99.8	501		CYP71AK16	MSPYLVLVAALVACSCVAIRKARGSSGKFPPSPPSLPLVGHLHLMGGVLHRSLLELHARYGSDGGLLLLQLGRRRTLVVSTAAAAADLYKNHDLAFASRVHSAVVDKLTYGSISVSFAPYGDAWRRCKKMAVVHLLSQRRADSFAPVRAAEAAALVEGARRGAEAGEAVELRELLYGYSNAVVTRAATGAAGATAEKIKQLLGNSAAVMSGLQAEDVLPDAPAKVVRRATGFEKRLDAEVEAWDKFLSEIVAEHLEEKPDNGAGEENFLDVLLRLRGEGTAGLELTDDRIKSIVKDMIAAGTETSSVTLEWAMVELVGNPRAMAKLQDEIARVTAGKPTIEEDDLSRIEYHKAVLKEVLRLHPPAPLLLPHESTTAAVVQGYEVPAKTALFINAWAIGR…
198	202	chr5	423173769		1			chr5_423173769_1	chr5_423173769_1_Aegilops_tauschii	CYP71AK17_5D_Triticum_aestivum(wheat)	99.8	503		CYP71AK17	MSPFAVLVAAVAVLVAFCYVTKKARSKNSKLPPSPPCMPLLGHLHLLGRLAHRSLRDLHARYGSDGGLLLLQLGRRRTLVVSTAAAAADLYKNHDLAFASRVLSAPVHKLSYGSINVSFAPYGDAWRRSKKMAVVHLLSQRRADSFAPVRAAEAAALVAGVRRAAEAREAVELRGLLYGYGNAVVTRAATGAAGATAERMKQLMGNSAALMSGLQAEDVLPDAAAKVVRWATGFEKRLDDQMEAWHKFLSEIIAEHLEKKKCDDSAGEEDFLDVLLRLRQEDTAGLDLTDDRIISIVQDLIFAGTETSSITLEWAMAELTRKPQTMAKLQDEVTRVTNDKLVIEEDDLSRMEYLKAVLKEVLRLHPPAPLLIPHESTTTSIVQGYEIPAKTTLFINAWA…
199	203	chr6	435421339		-1			chr6_435421339_-1	chr6_435421339_-1_Aegilops_tauschii	CYP71AM10_6D_Triticum_aestivum(wheat)	99.6	503		CYP71AM10	MEHFTLPYYYQFGSCLFLALLLHVVLRAKKTRPRLPPGPWQLPIIGSLHHLLRGLPHRTMRDLSLRHGPLMQLRVCERVAIVVSSAEAVREIYKGNEANFSERLSSPGIDELSRHGQGIIFAPYGDHWRFLRRILMTELLSARRVEAFWRIREEEAARLVSSLQAMSDGRLVNIDKRLDEFMTDSAVRAIFGDRLPDRVAFMKNVKQGVDLSSLFDLRDLFPSSRLVRLLPRNGGKAERHRQEMFRLMDNILRSHEERRAARDGDDEQDMVDVLLRIQKEGNMRVALTDGVIRALLIDVFGAALDTSTTTLQWVMVELMANPSVMLRVQSEIDCVLTGQDTVQEASLKGMQYLRVIIKETLRLHPPAPFFPRLCLQDYKIQGYDVPQGVILLTNIWAIS…
200	204	chr6	435580543		-1			chr6_435580543_-1	chr6_435580543_-1_Aegilops_tauschii	CYP71AM13_6D_Triticum_aestivum	100	373		CYP71AM13	MEHFTLPYNYHFGLCLFLALLLHAVLRAKKPRPRLPPGPWQLPVTGSLHHLLRGLPHRTMRDLSLRHGPLMLLRVCERVAIVVSSAKAAREIYRGNEAAFSERLSSPGIDELCRHGQGIVFAPYGDHWRLLRRILMTELLSARRVEAFRRICEEEAARLVSSLRATSDGRLVNIDERLDEFMTDSAVRAIFGDRLPDRAAFLKIVKQGVGLSSLFDLRDLFPSSRLARLLPRSGRAERQRQDTFRLMDNILKTQEERRMGRDGDDEQDMVDVLLRIQKEGNMRVSLSDGVIRALLIDVFGAALDTTTTILQWAMAELMSNPRVMQRVQSEADYVLARHATVQEASLKSMHYLKVVIKETLRLHPPASLFPKVCVQDCKIQGYDIPRGATMLTKTWAISR…
201	205	chr6	436038620		1			chr6_436038620_1	chr6_436038620_1_Aegilops_tauschii	CYP71AM12_6D_Triticum_aestivum(wheat)	100	505		CYP71AM12	MEYFTLPYYYHFGLCLFLSILFHGVLRATAKQPRLRLPPGPWQLPIIGSLHHLLRGLPHRTMRDLSLRHGPLMMLRVCERVAIVVSSAEAAREIYRGNEAAFSERLTSPGIDELYRHGQGIVFAPYGDHWRLLRRILMMELLSARRVEAFRRIREEEAARLVSTIQATSSPSDGRLVNIDERLDEFMTDSAVRAIFGDRLPDRGAFLKIVKQGVGLSSLFDLRDLFPSSRLARLLPRSGKAERQRQETFRLMDNILKTREERRMGREGDDEQDMVDVLLRIQKQGNTRVSLSDGVIRALLTDVFAAALDTTTTILQWAMAELMINPRVMRRVQSEADYVLAGHATVQEASLKSMQYLKVVIKETLRLHPPASLFPRVCVQDCKIQGYDVPRGATMLTNT…
202	206	chr1	488665544		1			chr1_488665544_1	chr1_488665544_1_Aegilops_tauschii	CYP71AM7_1D_Triticum_aestivum(wheat)	99.81	516		CYP71AM7	MEQFTTLLLLPYYRFGLCLFCALFLYAVLRAVLGGAQHTRHWPDRGLPPGPWQLPVIGSLHHLLGGLPHRTMRDLSLHYGPLMLLRVCERVLVVVSSAEAVRDIAKGHDVAFSERLTGPGVDELTRHGQGIMFAPYGEHWRVIRRIIMTELVSARRVRSFGRIREEEAACLVSSLRAATPGAGPQLVNIDERLDEFVLESVVRAIYGDKLPERTAFHRLVRQGVQLSSLFDLRDLFPSSRLVRLLPRRRGKAARYRQEMSRLMETILRTHEERRSARVDDERDMVDVLLRIQKEADMPISITHGVIREVLKDVFGAGLDTTMITLRWVMAELMVNPGVMQKAQSEIRHVLAGQARVHEAALNDLHYLRAVIKETLRLHPPGPLVPRMCLQDCKIQGHVV…
203	207	chr1	11825371	11827467	-1			chr1_11825688_-1	chr1_11825688_-1_Aegilops_tauschii	CYP71BU10_1D_Triticum_aestivum(wheat)	99.24	524		CYP71BU10	MEDTTTMLVFLLLPALTILCTLLLRAAISKEHATSCSSDAVDVPVPPPSPWRLPLVGNLHQLAGRRLLPHRSLASLAAAHGPVMLLRLGQVRAVVVSSAAAAREVMQTHDRVFASRPSLAVPGKLFYGCTDIAFAPHGPYWVHARKMSVLHLLSPARVRAYRAVREEEVQALVQMVHVQRLSCGGGVVRLSELLAGFAKDVTGRIVFGASPSTAEGWGAKVDTLLEEGNALLGTFHVQDCFPGLAWLGLGGLDNKVRKAFERIDPILEEILEVAGRQLLSPQQDTPTTTSGSTFVHVMLSLDNISGGSAAWRFSRDNVKAILMDLFGAGTEATIVVLEWVMAELVRNKGAMERLQHELRKSLISDSDMITEHDLQGMVYLKAVIKETIRLHPPGPLLLP…
205	208	chr7	602239488		1			chr7_602239488_1	chr7_602239488_1_Aegilops_tauschii	CYP71BU14_7D_Triticum_aestivum(wheat)	95.7	512		CYP71BU14	MPFPIPLATLQVATLILLVSCSLLLLLRTQTKKHPADQRLPPSPPRLPIFGNLHQLGALPHRALHELAVAHGPVMLLHLGRVPTLVVSSANAARKVLQLQDHAFASRPSLAIPSRLLYGCTDIAFAPHGAYWRSVRKLAVLHLLSPGRVRAYRGVREEEVAKLVRRVEEERAHGGGVVRLSELLGGFAKDVNGRIMLGVRASGAAGWRAKVDALLEEANALLGAFHVGDYFPWLAWVAAVDGTDAKVSRAFERIDRILEEIVDVAASTGVGGCRCEDEAFVHVLLSLQRESSETGFRLSRDNVKALLEDLFGAGTDSTIIVLEWVMAELLRNKPVMQKLQQEIRRHYTKTSHLLMITEQDLPVMEYLRAVIKETMRLHPPGPLLVPRESMKHARVQDYH…
204	209	chr5	383348547		-1	last exon only		chr5_383348547_-1	chr5_383348547_-1_Aegilops_tauschii	CYP71BU13_5A_Triticum_aestivum(wheat)	91.26	206	cannot find the first exon	CYP71BU15P	DLFGAGTDSTIIVLEWVMAELLRNKEAMQKLQQEIRRHCTKSHSRIITEQDLQAMEYLRAVIKETMRLHPPGPLLVPRESMQHAKVHVYDVPRGTRIIVNAWAVGRDPTVWDNAGEFRPERFIDSEVDFRGRHPQLIPFGAGSRMCPGIGFTTSVVELALANLLGHFNWTVPMLENKEPGVIDMEEASGITSRKRVPLCAVATRPT
206	210	chr5	386127944		-1			chr5_386127944_-1	chr5_386127944_-1_Aegilops_tauschii	CYP71DK2_5B_Triticum_aestivum(wheat)	92.53	509		CYP71DK2	MEMLPLISLVVAVVCIMRAIVLMIQNAGSTSASTRAGEAPLPPGPSKLPLIGSIHHLATGELPHHAITRLGREHGPVMHLQMGQVGLVVVSSREAAREVMKVQDANFAHRPELAWPKALLYGCADVAFSSGGPSWRRLRKVCVVKLLCANRVRSFAPIRREETRRLLESIAGHPPGKAIDLRAMVEALNSTIVSRTALSETFEHRGSILKKGLELASGFNLSDHFPSLSFLNVLMRHRLRRVHRQVDKLLEDIIGERKRLRQKKMKDTAEDMLDVLLDAMEHPDTDVPITHDNIKAVIMDMFAGGTETSSSTIEWAIAELMKNPKEMTKVQDEVRTKMQGEASWCDIGQLSYLRLVVKETLRLHMPAPLLIPRVCKEQCRLGGYTIPAGSRVVINAWAM…
228	211	chr1	443503148		-1			chr1_443503148_-1	chr1_443503148_-1_Aegilops_tauschii	CYP72A6v2 Triticum aestivum	98.5	533		CYP72A6v2	MDLELLWSGRPALSALPWICGGLVATVLLWQAARLLDQLWWRPRRLERALRSQGLRGTRYRFLLGDVNDYARQTKEASSGPPMPPRCHDVGPRAMPFLYSTIQEHGAPCISWFGPVPKVSITDPALVREVMSSKLARDVEKFKFPALTRLLADGVGNYEGDRWAKHRRILNPAFHAEKLKLMLPAFTACCEELVGRWEQSLGPDGSWEVDVCPELQSLTGDVISQTAFGSSYLEGRRIFQLQTEQIGRFMAAVNKIMIPGYMSFPTKNNRRMHQINKEIESILRGIIAKRMQAIQEGESTKDDLLGLLLESNMSDTDENGQSTLGMSADEVMEECKLFYFAGMETTSILLTWTMIVLSMHPEWQDRAREEVLGLSGKHKLEYEGVNRLKIVTMILYEVL…
209	212	chr2	165986450		-1			chr2_165986450_-1	chr2_165986450_-1_Aegilops_tauschii	CYP72A577_2D_Triticum_aestivum(wheat)	99.62	527		CYP72A577	MVLSTLMSAASVPWSSLVCGTLGFVLLWQASRLVDLLWWQPRRLERALRAQGLRGTSYRFVIGDMMDYRRRRKEAQSRSMPLRCHSIAPLVAPLLCDIVREHGKTCMSWYAMYPKVTIHDPDLAKEVLSNKFGHFEKVKFPPLSRLLAAGLAEHEGEKWVKHRRILNPAFHLEKLKLMLPALSTSCEELVNRWTRSLGSDGTYELDVFPEFQRLTGDVISRTAFGSNYLEGARVFQLQSEQVERIAGAWKIGIPGYLRSLPTKNNRKMHQNNSEIESILHGLIGKRMQAMQEGENTKEDLLGLMLESNMRTSDDNGQSISGMTIKEVVEECKLFYLAGTETTSILLTWTMIVLSMHPEWQDRAREEVISLFGKNKLNYEGVNRLKTVTLILYEVLRLYS…
210	213	chr1	204563	207008	-1			chr1_204868_-1	chr1_204868_-1_Aegilops_tauschii	CYP72A580_1D_Triticum_aestivum(wheat)	99.25	532		CYP72A580	MATSVMGSFLAPREALYAAAVAAMAWCAVRAVEWAWWRPRRLGRALRSQGLRGTAYRPVAGDTPMMQRLNREARSRAMPLGVGCHDVVPRAMPLFHRAMQEHGKMSITWFGPVPRVTITKPELVREVLSNKFGHFEKLKFGRLQRMLHNGVGNHEGEKWARHRRIINPAFHLEKLKRMLPAFAACCTELVQRWEGLALVAGDAPCEVDVWPDMQNLTGDVISRAAFGSSYLEGRRVFQLQGEQLELFLLAMTKMHIPGYLLLPTKVNRRMKQIAAEIERVLKGIVAKRENAMRAGEATSDDLLGVLLESNMAHCRDSKGAGMGITTDDVIGECKLFYFADAETTSVLLTWTMILLCMHPEWQDRAREEVLRVLGPTGTPDHDGLSRLKVVTMVLYEVLR…
211	214	chr1	198835	201791	-1			chr1_199119_-1	chr1_199119_-1_Aegilops_tauschii	CYP72A581_1D_Triticum_aestivum(wheat)	100	526	removed intron VILYTYYFYCHIDIGQGVTKETGCCWINFQ	CYP72A581	MESFLPREALYavvvaamawcamwalewawwRPRRLGRALRSQGLRGTAYRPVAGDSPRMQRLNREARSQAMPLGCHDVVPRAMPLFHRAMQEHGKMSITWFGPVPRVTITKPELVREVLSNKFGHFEKLKFGRLQRMLHNGVGSHEGEKWARHRRIINPAFHLEKLKRMLPAFAACCTELVQRWEGLVAVAGDAPCEIDIWPDMQNLTGDVISRAAFGSSYLEGRRVFQLQGEQLELVLLAMSKMHIPGYFFLPTKANRRMKQIAAEIERVLKGIVAKRENAMRAGEATSDDLLGLLLESNMAHCGRDSKGAGMGITTDDVIGECKLFYFAGAETTSVLLTWTMILLCMHPEWQDRAREEVLHVFGAAATPDHDGLSRLRVVTMVLYEVLRLYTPVTA…
212	215	chr1	108813860	108817127	-1			chr1_108814306_-1	chr1_108814306_-1_Aegilops_tauschii	CYP72A582_1D_Triticum_aestivum(wheat)	100	529	trimmed intron ASASSKVCLRLNIRLLSLPVHMMIYTKFSYIYIQ	CYP72A582	MVLQAAATSLVASLQSPWSVLCGaaallviwaaalaaESYWlrprrlgralraqglggTSYRFPAGDSAENARQSLEALSKPMPPSCHDVLPRVMPHLHNTVKEHGEVCVTWDGPDPKVVIAKPELVTEILSSNSGHFEKLRTNLGDLVCRGVGSYDGEKWARHRRILNPAFHLEKLKAMFPAFSTCCTELVDRWESKLLAAGSEGSVELDVSQEFPVLTGDVITRTSFGSSFTEGRRIFELQVDQAKRLMKLLQYLYIPGFLSFLTENNRRMWENKREIEGLVRGVVEKRERAMDKDGAIGNDMLGLMLQSNRSSNSDLRMSTQDVIQECKLFYFAGMESTQQLLTWTVVMLRMYPEWQDRAREEVLGVFGRDGKPGFDGLNRLKTMTMILYEVLRLY…
213	216	chr2	596905847		1			chr2_596905847_1	chr2_596905847_1_Aegilops_tauschii	CYP72A583_2D_Triticum_aestivum(wheat)	99.62	528		CYP72A583	MEEAMAILPDASPWSLLAGAAAMATLWWAVRMLEWVWWGPRRVERALRAQGLRGTQYRLLRGDIKEEQRLMRAALSKPVPMDRPHHIVPRVSPLLHRVTEEHGKVSLTWFGPYPRITISDPELVRQVLANKFGHFDKTKLARLAKVFIGGLAVLDGEEWAKHRRIMNPAFHAEKLKRMLPAFSASCSELIDRWENSVTVSVGAIELDVWSEFQNLSGEVISRAAFGVTNEEGRRIFQLQAEQAERLVQSFRTNYIPGFSLLPTENNRRMKAINTEVKAILRGIIEKRQKYMKNGGTDKDDLLGLLLESNMDYSDADGKTNKGMTVEDVIDECKLFYFAGMETTAVLLSWTVVLLSMHPEWQDRAREEVLQVFGKNKPDLNGLSRLKVVMMVFNEVLRLY…
214	217	chr3	323671302		1			chr3_323671302_1	chr3_323671302_1_Aegilops_tauschii	CYP72A584_3D_Triticum_aestivum(wheat)	100	523		CYP72A584	MGSPVSFPRELLLYVVAGAAIAWCAVRALDWAWWRPRRLDRALRSQGLRGTPYRSVAGDAPLAERLNEDARSRSMPLGCHDVVPRAMPLFHQTMKEHGKMSITWFGPSPRVTITKPALVREVLCNKSGDFEKLKLGRLQRMLHNGIGSHEGEKWAKHRRIINPAFHLEKLKRMLPAFAACCTDLVDRWEGLAAGDAACEVDVWPDMENLTGDVISRAAFGSSYLEGRRIFQLQGEQIELTVLAMNKIHIPGYLFFPTKANRRMRQIAAEIERILKGIIAKRENALRAGEATSDDLLGLLLESNMAHTRAGGNSKAGITTDDVIGECKLFYFAGMETTSVLLTWTMIVLCMHPEWQDRARDEVVHVFGDRTPDYDGLSRLRIVTMVLYEVLRLYTPLTAL…
215	218	chr3	323360052		-1	pseudogene		chr3_323360052_-1	chr3_323360052_-1_Aegilops_tauschii	CYP72A585_3B_Triticum_aestivum	95	520		CYP72A585P	MVLGALISPALVQWSFLLCGSLGFVLLWQAAKLIDRLWWHPRRLERALRAQGLHGTSYRFLVGDVVDYERRSKAAPSRSMPLRCHNIAPLVAPLLHDIVREHGKACISWFGPYPKVTISDPDLTKEVMSNKFGHFEKLKFPALSRLLAGGVATYEGEQWVKHKRILNPAFHLEKLKLMMPAFSTCCQELVSRWTLSLGSDGTYEVDACPEFQRLSGDVISRTAFGSNYAEGARIFQLQSVQTPRLLARVKKIIIPGYLSLPTKNNRRMSEINNEIESILLNLIRKRMQAMQEGENTKNDLLGLMLESNMRGTDENGQCISGMTIDEVVEECKLFYFAGTETTSILLTWTMVILSMHPEWQDRAREEVLGLFGKNKIEHEGFARLKTVTMILYEVL*LYP…
216	219	chr3	323439971		1			chr3_323439971_1	chr3_323439971_1_Aegilops_tauschii	CYP72A586_3D_Triticum_aestivum(wheat)	100	533		CYP72A586	MLFERGMAVLGGVTPASLPWGFLVCGLLCLALLRQAGKLLDMLWLRPRRLERELRAQGLRGTPYRFPVGDLKEHGRLSKEAWARPLPLGCHDISAHVAPFLYNAVEEHGRTCFSWVGPIPKVTISDPDLAKDVMSNKFGHFEKTKLPALSKLLAEGLASIDGEKWAKHRRILNPAFQLEKVKRMLPAFSSCCEDLVSRWRTSLGSKGSCELDVWPELKNLTGDVISRTAFSSSHLEGRKIFQLQEEQAERLITNIRGLLIPGYLSLPTKNNRRMHQINKEIESILKNLVGKRIQAMKQGESTKDDLLSLLLESNMRQTDEHGRSSLGMTIEDVIEECKLFYFAGMETTSVLLTWTMILLSMHPEWQDRAREEIMGLFGRNKPEYEGLSRLKTVTMILYE…
217	220	chr3	323405811		1			chr3_323405811_1	chr3_323405811_1_Aegilops_tauschii	CYP72A587_3D_Triticum_aestivum(wheat)	100	532		CYP72A587	MEVAVAATTLGVGGDVSSPSSLSLLCGLSALLVLLWALSRAAETCWLRPRRLSRALRAQGLGGTAYRFPAGDLADNGRLNEEARSKPMPPCHDIVPRVAPHLLNIVKEHGNVCITWFGPVLRMVIAEPKLVREILSDKSGHFEKFTNKRLGKLIALGLASYDGEKWATHRRILNPAFHLEKLKSMLPAFSTCCTELISSWESKLAGSDGSHEIDIWEDFQNLTGDVISRTSFGSSFMEGRRIFQLQAEQAERIIKAFQYMYIPGYLFFPTENNKRMKQINREIEGLLRGIIEKRERAMENDGLSSGNDLLGLMLQSNKESGASRMRMSTEDVIEECKLFYFAGMETTSVLLTWTLVVLGMHPEWQDRAREEVLSVFGKDKPNFDGLSRLKTVTMILYEV…
218	221	chr4	2032193		1			chr4_2032193_1	chr4_2032193_1_Aegilops_tauschii	CYP72A590_4D_Triticum_aestivum(wheat)	99.62	533		CYP72A590	MATSVVEDSFPWEQQPLVHVYAVAGTVLAWCAVRALEWAWWRPRRLERELRAQGLRGRAYHSVAGDAPFMERLHKEARSRTMPLGSHDVVPRAMPLFHQTIMEHGKLSITWFGPVPRVTITEPELVREVLSNKLGHLEKLNLGRLQRMLHHGVGSHEGEKWAKHRKIITPAFHLEKLKRMLPAFATCCTELVHRWEVLAAGDAPCEVDVWPDMKNLTGDVISRAAFGSSYHEGRKVFQLQGEQIELIVQAMDKMHIPGYLFLPTKGNRRMNQIVAEIERVLKGIIAKREKALKAGEATSGDDLLGLLLESNIAHCRPGDAGAGITTEDLIGECKLFYFAGMETTSLLLTWTMIVLCMHPDWQDRAREEVMHVFAHGTTPDYDSLTRLKIVTMVLYEVLR…
219	222	chr4	357221295		-1			chr4_357221295_-1	chr4_357221295_-1_Aegilops_tauschii	CYP72A591_4D_Triticum_aestivum(wheat)	99.43	529		CYP72A591	MVLGAFFATAASVPWRRSLLLLPTLALLWQLCRLLHRLWWRPRCLERELRSKGLRGTSYRFLTGDLREQGRRNKDAWSRPLPLRCHDIAPRVAPLLCDSVREHGKVSLSWFGPIPKVTIADPELAKSVLSDKSGHFEKPKFPALWKLLANGLLNHEGEKWVKHRRLLNPAFHLEKIKCMLPEFSACCEELVGRWTESIGSSGGMHELDIWPELKNLAGDVISRTAFGSSYLEGMKIFQLQTEQAERLIANIRRILIPGYLSLPTPNNKRMYQVNNEVESILHGLIAKRTKAIKEGESTKDDLLGLLLESNMRHTYDNGQSSMGMTNEDVIEECKTFYFAGMETTSVLLMWTMIVLSMHPEWQDRAREEVLSLFGKNKPGYEGLNRLKTVTMILYEVLRL…
220	223	chr5	45387046		1			chr5_45387046_1	chr5_45387046_1_Aegilops_tauschii	CYP72A592_5D_Triticum_aestivum(wheat)	99.81	527		CYP72A592	MAIGAVLSQQWSLLFSVAALVALWWAWRVLELAWITPRRLDRALRAQGLGGRAYRFPFGDLREFSRLVAVARSVPMLPPSHNITARVAPLYHSVIKEHGKISVTWFGPTPRVIVNDPKLVREILANKSGHFRKRKFSNGIVRRLANGLVSHDGEKWAAHRKIINPAFHLEKLKKMMPAFVACCNELVTRWEDRVGSDEAKEIDVWPEFQNLTGDVISRAAFGSSFSEGRRIFQIQSEQAQNVVKMLNTLYLPGFKFLPMQLNRRVKANAREVEWLLKGIIGRRERAMREGNASNDDLLGVLMECNAAETKEAGSSKPIMTMDDIIGELKLFYFAGMDTTAVLLTWTLVALSMHPEWQDRAREEVLRVFGKEDQPDLDGVNQLKVVAMVLHEVLRLYPPV…
221	224	chr5	517509595		1			chr5_517509595_1	chr5_517509595_1_Aegilops_tauschii	CYP72A594_5D_Triticum_aestivum(wheat)	99.81	523		CYP72A594	MATSVTGSPVPSPREVLYAVAAAAIAWCAVRALEWAWWRPRRLDRALRSQGLRGTAYRPVAGDVQLSQRLNKEARSRTMPQGCHDVVPRAMPLLHQAAKEHGKMSFTWLGPVPRVTITKPELVREVLSNKSGHSEKLNLGRLQRMLHNGVGGHEGEKWAKHRRIINPAFHLEKLKRMLPAFAACSTELVCRWEGLAAGDAPCEVDVWPEMQSLTGDVISRAAFGSSYLEGRRIFQLQREQIELAMFAMSKMHIPGYLFLPTKANRRMRQIAAEIGRILKGIIVKRENALRAGEATSDDLLGLLLESNMVHGRGDGITTDDVVGECKLFYFAGMETTAVLLTWTMVVLCMHPEWQDRAREEVTQVFSAGTTPDYDGLGRLKTVTMVLYEVLRLYTPLTAL…
222	225	chr6	405217236		-1			chr6_405217236_-1	chr6_405217236_-1_Aegilops_tauschii	CYP72A595_6D_Triticum_aestivum(wheat)	100	527		CYP72A595	MAFDLAAAAAAVPWSYLLYGLTGSALLWQARLLLDRLWWRPRRLERTLRAQGVGGTPYRFLMGDLKDFGRLNDEAWSKPLPLRCHDIVPRVIPFLHNNVRDNGKPCFSWFGPVANVAITDPELIKDVLSNKFGHFEKPQFPALTKLLANGLTTHEGEKWVKHRRILNPAFHLEKLKLMLPAFSASCEELVTRWKELHGSGGSCEVDVWPELQNLTGDVISRTAFGSSYLEGRRIFQLQSEQAKLFVGAVQRIIIPGYLLLPTKNNLKMRKNNKEVESILQGLINKRMRAMEEGEKSENDLLGLLLESNMKDVDENGQPSQGMAMEDVIEECKLFYLAGMETTSVLLTWTMIVLSMHPEWQDLAREEVLGLFRKNKPEYEGLSRLKTVTMILHEVLRLYP…
223	226	chr6	475482541		-1			chr6_475482541_-1	chr6_475482541_-1_Aegilops_tauschii	CYP72A596_6D_Triticum_aestivum(wheat)	98.85	523		CYP72A596	MVLGVLVSPPATVLWTFLGLALLWQVKRLVDYTWWRPRRLQRALRAQGLRGTPHRFPVGDLGDYGRQGKEASSRALPLRCHDIRAHVAPYLYNTVREHGKTCVSWFGPVPKVTIADPGVTREVMSNKFGHFEKLQFPTLTRLLAGGVAVYEGEKWVKHRRILNPAFHIEKLKLMMPAFSACCEELVSRWTQSLGSDGWCEVDVCPAFQTLTGDVISRTAFGSSYLEGRRIFELQSVQADRIVAEVKKIFIPGYMSLPTKKNRLMHQTNNEIESILRGLIEKRMQAMQQGESTKDDLLGLMLESNMRETDDKGQPILGMTIEEVIEECKLFYFAGSETTSVLLTWTMIVLAMHPEWQDRAREEVLGLFAKNKPEYDGFSKLKTVTMILYEVLRLYPPAVA…
227	227	chr7	618536144		-1			chr7_618536144_-1	chr7_618536144_-1_Aegilops_tauschii	CYP72A598_7D_Triticum_aestivum	98	518		CYP72A598	MDTLGSPPWSLLCALGALLAALWCAGRALTGAWLRPRRLARALRSQGVSGTQYRFPSGDMKEYVRLIAAACSQPMPLSLHAVAARAVPFDHAIIKQHGKVALTWFGPEPRVVVADPRLFREILSNKQGQFGKQRSILRIERLLANGLTTHQGDKWVAHRRIINHAFHLEKLKRMLPAFAECSSELVRRWGDSMGQSDVQEIDVWPEFQNLTGDVISRVAFGSSFGEGRKIFQLQSEQAQNAVKMANVMYIPGYRRFLPTKLNTRMKANAREVELLLKGVITKRERAMKDGHADNDDLLGVMMESNIEESQEAGSSMPTMTTDDIVGELKLFYFAGMETTAVLLTWAMVLLSMHPEWQDRAREEVLRVFGKNQPDSEGINRLKVVTMILYEVLRLYPPIL…
224	228	chr7	560291310		-1			chr7_560291310_-1	chr7_560291310_-1_Aegilops_tauschii	CYP72A599_7D_Triticum_aestivum(wheat)	100	518		CYP72A599	MLGDASPWSIAGAVAAVALLSLAAWILEWAWWTPRRLGRALRAQGLRGTRYRLFSGDAPEDARLSREARSQPLPLGSHDIIPRVHPMLCNAVKEHGKMPFTWFGPTPRVLVSDPDLVREILSNKLGHYRKQRSSRMGKLLADGVANHEGEKWAKHRRILNPAFHHEKIKRMLPVFSTCCEEMVARWENSMSTEGLSEIDTCPEFQNFTGDVIARTSFGSNYQEGKKIFELQGELAKRLMQAFQTFFIPGYWFLPTKNNRRMRAIDHEIRMIMRGIIGKKERAIKNGEASSNDLLGLLLESNMQQSNGKAGQGMSIDDIIEECKLFYFAGMETTSVLLTWTLIVLSMHPEWQEQAREEVLHHFGRTTPDYEHLSRLKIVTMILYEVLRLYPPVTYLTRRT…
226	229	chr7	559271383		1			chr7_559271383_1	chr7_559271383_1_Aegilops_tauschii	CYP72A600_7D_Triticum_aestivum(wheat)	99.81	528	88% to chr7_559276281	CYP72A600	MATEGLRMLLADAARSPWSVAGAAAAVALLWFAAWVLEWAWWTPRRLGRALRAQGIRGTRYRLFTGDIPENARCNAVARSRPMPRGDHDIAPRVLPMFSNAIKEHGKVSFTWFGPTPRVMIPDPELVREILSNKFGHFGKQRSTRIGKLLANGLANHEGEKWAKHRRILNPAFHHEKIKRMLPVFSACCEEMITRWENSMSADGSCEIDFCPEFQNLTGDVISRTAFGSNFQEGMKIFQLQGEMGERLIQAFRTFFIPGYWFFPTKNNRRMRAIDREIRMILRGIIGKKERAIKNGEASSDDLLGLLLESNMQQSNGKAKLGLSIEDIIQECKLFYFAGMETTSVLLTWTLIVLSMHPEWQEQAREEVLHHFGRTTPDFENLGRLKIVTMIFYEVLRLY…
225	230	chr7	559276281		1			chr7_559276281_1	chr7_559276281_1_Aegilops_tauschii	CYP72A600_7D_Triticum_aestivum	100	526		CYP72A678	MATEGLRMLLGDASPWSIAGAAAAVALLWLAAWILEWAWWTPRRLGRALRAQGLRGTRYRLFTGDVPENARLSREARLQPMPRGSHDITPRVQPMSCNVIKEHGKMSFTWFGPTPRVTIPDPELVREILSNKFGHYGKQKSSRFGKLLADGVASHEGDKWAKHRRILNPAFHHEKIKRMLPVFSACCEEMITRWENSMPTGGLCEIDVFPEFQNLTGDVISRTAFGSNYQEGMKIFQLQGELCERLIQAFQTLFIPGYWFLPTKNNRRMRAIDREIRMILRGIIGKKERAIKNNEASSDDLLGLLLESNMQQANGKANLGMSIEDIIEECKLFYFAGMETTSVLLTWTLIVLSMHPEWQEQAREEVLHHFGRTRPDFENLSRLKIVTMILYEVLRLYPP…
207	231	chr7	79017809		-1	pseudogene		chr7_79017809_-1	chr7_79017809_-1_Aegilops_tauschii	CYP72A162 Brachypodium distachyon	70.55	523	no better hit in wheat	CYP72A679P	MNLASIPWGSVIRGILGLVLLWQATQLLHWLWSPAAXXXXXXXXXXXXXGLRGTPYRFLTGDIXXXXXXXKRAWSKPMLLGCHDISPHVAPFLHDVLRKHGKTCVSWLGPTPKVTIVDPSLAKEVMSNKFGHFEKLRFPALSMLLAKGVADYAGQKWAKHRRILNPAFHLEKLKLMLPAFSACCEELVGWMRSLDPNNSCELDVYPELQSLTGDVISRIAFGSSYLDGREIFQLQSEQAERLLTNLKKIIIPGYRFLPTRNNRRMHQINRKIESILRTLTEKRMKAMQEGESTKDDLLGLMLHSSMTATNENSQSIPGMTIEEVIQECKLFYFAESETTSVLLTWTMIVLSMHPEWQYRARNEILGIFGKNKPEYEGFGRLKTVTMILYEVLWLYPPAI…
208	232	chr7	78629658		-1	pseudogene		chr7_78629658_-1	chr7_78629658_-1_Aegilops_tauschii	CYP72A596_6D_Triticum_aestivum(wheat)	72.01	268	88% to CYP72A679	CYP72A680P	LPTRNNRRIHQTNRKIECILGTLIEKRMKAMQEGESTKDDLLDLMLHSNMTATNENSQSIPGMTIEEVIEECKLFYFAGSKTTSVLLTWTMIVLSMHPEWQYRARNEILGIFGKNKPEYENFGRLKMVTMILYEVLWLYPSAITFIRKTCKDMKNGGITYAGGVLIELLVLFIHHDLEIWGSDVLEFNPERFAEGIFKASKDASAFIPFGWGPRVCIG*QFAHLEAKMAMCMILRHFEFSLAQAYTHAPHNVTFLRPMHGQIKLGAI
234	233	chr3	97387118		1			chr3_97387118_1	chr3_97387118_1_Aegilops_tauschii	CYP73A17 Triticum aestivum	98.6	501		CYP73A17	MDVLLLEKALLGLFAAAVLAIAVAKLTGKRFRLPPGPSGAPIVGNWLQVGDDLNHRNLMGLAKRFGEVFLLRMGVRNLVVVSSPELAKEVLHTQGVEFGSRTRNVVFDIFTGKGQDMVFTVYGDHWRKMRRIMTVPFFTNKVVAQNRVGWEEEARLVVEDLRADPAAATAGVVVRRRLQLMMYNDMFRIMFDRRFESTADPLFNQLKALNAERSILSQSFDYNYGDFIPVLRPFLRRYLNRCTNLKTKRMKVFEDQFVQPRKEALEKTGEIRCAMDHILEAERKGEINHDNVLYIVENINVAAIETTLWSIEWGIAELVNHPEIQQKLREEIVAVLGAGAAVTEPDLERLPYLQSVVKETLRLRMAIPLLVPHMNLSDAKLAGYDIPAESKILVNAWFL…
230	234	chr7	509041034		-1			chr7_509041034_-1	chr7_509041034_-1_Aegilops_tauschii	CYP73A202_7D_Triticum_aestivum(wheat)	100	534		CYP73A202	MAVSARSAAFATAASLAVYWLLTSFLHAPHPALLPAAAALVAVAIAAGAGRKRGGAGAPPGPAAVPVFGNWLQVGNDLNHRFLARLSARYGPVFRLRLGVRNLVVVSDPQLATEVLHTQGVEFGSRPRNVVFDIFTANGADMVFTEYGDHWRRMRRVMTLPFFTARVVQQYRSMWEAEMDDVVSDLRGDSAARGAGVVVRRRLQLMLYNIMYRMMFDARFESVDDPMFVEATKFNSERSRLAQSFDYNYGDFIPILRPFLRGYLNKCRDLQTRRLAFFNANYVEKRRKVMDTPGDKNKLRCAIDHILAAEKSGEITPENVIYIVENINVAAIETTLWSIEWALAEVVNHPEVQRKVRGEIRDVLGDDEPITESNISKLPYLQAVIKETLRLHSPIPLLV…
231	235	chr2	108112228		1	pseudogene with frameshift in front of C-helix		chr2_108112228_1	chr2_108112228_1_Aegilops_tauschii	CYP73A203_2D_Triticum_aestivum(wheat)	99.62	533		CYP73A203P	MAASAPRVAFATAASLAVYWLLKSLLHTPHPALLPAAAALVAVAITVAAGGKLGAGAPPGPAAVPVFGNWLQVGNDLNHRFLARLSARYGPVFRLRLGVRNLVVVSDPRLATEVLHTQGVEFGSRPRNVVFDIFTANGADMVFTEYGDHWRRMRRVMTLPFFTARVVQQYRSMWEAEMDGVVSDLRADSAARGAGVVVRRRLQLMLYNIMYRMMFDARFDSVHDPMFVEATKFNSERSRLAQSFDYNYGDFIPILRPFLRGYLNKCRDLQTRRLAFFNSNYVEKRRKVMDTPGDKNKLRCAIDHILAAEKSGEITPENVIYIVENINVAAIETTLWSIEWALAEVVNHPDVQRKVRGEIRDVLGDDEPITESSISKLAYLQAVIKETLRLHSPIPLLVP…
232	236	chr2	380613162		1			chr2_380613162_1	chr2_380613162_1_Aegilops_tauschii	CYP73A204_2D_Triticum_aestivum(wheat)	100	506		CYP73A204	MDLLFLEKLLVGLFASVLVAVAVSKLRGRKLRLPPGPVPVPIFGNWLQVGDDLNHRNLAALARRFGEIFLLRMGQRNVVVVSSPDLAREVLHARGAEFGSRGRNVVFDVFTDGGQDMVFAAYGDHWRTMRRVMTAPFFTGKVVQRHHAGWEAEAAAVVDAVRADPAAATGGVVLRRHMQLMMYNNMYGLMFGRRFEGLDDPLLLRLRELNGERSRLAQSFEYNYGDFIPVLRPFLRGYLKICKEVKDARLKLYKDCFVEERRKMLARFKATDSHELKCGMDEILEAQRKGEINEDHVLFIVENINVAAIETTLWAMEWAVAELVNHPETQQKLRREMDTVLGAGHQVTEPDTHRLPYLQAVVKEALRLRMAIPLLVPHMNLRAAELGGHGVPAESKVLV…
233	237	chr4	512743983		-1			chr4_512743983_-1	chr4_512743983_-1_Aegilops_tauschii	CYP73A205_4D_Triticum_aestivum(wheat)	99.6	500		CYP73A205	MDVNLLEKALLGLFAAAMLAIAVAKLTGKRFRLPPGPSSAPIVGNWLQVGDDLNHRNLMGMAKRFGEVFLLRMGVRNLVVVSSPELAKEVLHTQGVEFGSRTRNVVFDIFTGKGQDMVFTVYGDHWRKMRRIMTVPFFTNKVVAQNRVGWEEEARLVVEDLKADPASATGVVIRRRLQLMMYNDMFRIMFDRRFESLADPLFNKLRALNAERSILSQSFDYNYGDFIPILRPFLRGYLNRCTNLKAKRMKVFEEDFVQERKKALEKNGEIRCAMDHILEAERKGEINHDNVLYIVENINVAAIETTLWSIEWGVAELVNHPDIQSKLRQEILAVLGPDAAVTEPDLERLPYLQAVVKETLRLRMAIPLLVPHMNLKDAKLAGYDIPAESKILVNAWFLA…
229	238	chr3	456359531		-1	pseudogene, frameshifts		chr3_456359531_-1	chr3_456359531_-1_Aegilops_tauschii	CYP73A201_3B_Triticum_aestivum	98	506		CYP73A201P	MDFVFVEKLLVGLLAAVVGAIVVSKIRGRKLRLPPGPFPVPIFGNWLQVGDDLNHRNLAAMARKFGEVFLLRMGQRNLVVVSSPPLAREVLHTQGVEFGSRTRNVVFDIFTGEGQDMVFTVYGDHWRKMRRIMTVPFFTNKVVQQYRPGWEAEAAFVVDNVRADPRAATDGVVLRRHLQLMMYNNMYRIMFDRRFESMDDPLFLRLRALNGERSRLAQSFEYNYGDFIPILRPFLRGYLRLCKEVKETRLKLFKDYFLDERKSTKAMDNNGGLKCAIDHILEAEQKGEINEDNVLYIIENINVAAIETTLWSIEWGLAELVNHPEIQQKLRDEMDAVLGVGHQITEPDTHRLPYLQAVIKETLRLRMAIPLLVPHMNLHDAKLAGYNIPAESKILVNAW…
235	239	chr4	408411769		-1		CYP74	chr4_408411769_-1	chr4_408411769_-1_Aegilops_tauschii	CYP74A1_4D_Triticum_aestivum(wheat)	100	482		CYP74A1	MAGGDEGSLVPREVPGSYGMPFVSAIRDRLDFYYFQGQDKYFESRVDKYGSTVVRINVPPGPFMARDPRVVAVLDAKSFPVLFDVDKVEKKNLFTGTYMPSTSLTGGFRVCSYLDPSEPTHTKVKQLLFSLLASRKDAFIPAFRSHFSSLLATVESQLVLSKKSNFNTLNDATSFEFIGDAYFGVLPSASDLGTTGPTKAAKWLIFQLHPLVTLGLPMILEEPLLHTVHLPPILVSGDYKALYKYFYAAATKALDTAEGLGLKRDEACHNLLFATVFNSYGGLKVLLPGILARIAGAGEKFHQKLVAEIRAAVADAGGKVTIEALEKMELTKSAVWEALRLDPPVKFQYGRAKADMNIESHDAVFAVKKGEMLFGYQPCATRDPRVFGSTAREFVGDRF…
236	240	chr4	421825080		-1	pseudogene, deletion near N-term	CYP74	chr4_421825080_-1	chr4_421825080_-1_Aegilops_tauschii	CYP74A97_4D_Triticum_aestivum	99	482	2 aa diffs	CYP74A97P	MAGGDEGSLVPREVPGSYSMPFVSAIRDRLDFYYFQGXXXXXPGPFMVRDPRVVAVLFDVDKVEKKNLFTGTYMPSTSLTGGFRVCSYLDPSEPTHTKVKQLLFSLLASRKDAFIPAFRSHFSSLLTTVESQLVLSKKSNFNTLNDATSFEFIGDSYFGVLPSASDLGTTGPTKAAKWLIFQLHPLVTLGLPMILEEPLLHTVHLPPILVSGNYKALYKYFYAAATKALDTAEGLGLKRDEACHNLLFATVFNSYGGLKVLLPGILARIAGAGEKFHQKLVAEIRAAVADAGGKVTIEALEKMELTKSAVWEALRLDPPVKFQYGRAKADMNIESHDAVFAMKKGEMLFGYQSCATRDPRVFGSTAREFVDDRFVGEEGRKLLQYVYWSNGWETESPSV…
237	241	chr4	408313251		1		CYP74	chr4_408313251_1	chr4_408313251_1_Aegilops_tauschii	CYP74A98_4D_Triticum_aestivum(wheat)	100	480		CYP74A98	MNQSAVGSLVPRQAPGSYGLPFVSAIRDRLDFYYFQGEAKYFESRVEKHGSTVLRINVPPGPFMARDPRVVAVLDAKSFPVLFDVDKVEKKNLFTGTYMPSTSLTGGFRVCSYLDPSEPTHTKVKQLLFSLLASRKDAVIPAFRSHFSSLLATVESQLVLGGKSNFNMLNDFTSFEFIADAYFGVLPSASDLGTTGPTKAAKWLIFQLHPLVTFGLPLILEEPLLHTVLLPPIFVSGDYKALYKYFYAAATKALDMAESLGLNRDEACHNLLFATVFNSYGGLKVMLPGILGRIAEAGEKFHQRLAAEVRIAVADAGGKVTIEALEKMELTKSAVWEALRLEPPVKFQYGRAKADMNIESHDAVFAVKKGEMLFGYQPCATKDPRVFGSTAREFVGDRF…
239	242	chr2	38973473	38973785	-1	pseudogene fragment aa 253-361	85% to CYP74A99_5A	chr2_38973473_-1	chr2_38973473_-1_Aegilops_tauschii	CYP74A99_5D_Triticum_aestivum(wheat)	79	108		CYP74A110P	NYGRLADFFRDAGKAVIDEGERLGIAREEAVHNILFAMCFNSFGGXXXXXXXXXXXXXXAGPRAPGRLAMEVRATVRANGGEVTIQALAEMPLVKSAVYKALRIEPPV
238	243	chr5	484643964		-1		CYP74	chr5_484643964_-1	chr5_484643964_-1_Aegilops_tauschii	CYP74A99_5D_Triticum_aestivum(wheat)	99.8	508		CYP74A99	MATAIHQLSFAAPSAGARRRLTRASASATDRHEVLSPKRRLPLRKVPGEHGPPLLGALKDRLEYFYGPGGRDGFFAARVRAHRSTVVRLNMPPGPFVAKDPRVVALLDAASFPVLFDTSLVDKTDLFTGTFMPSTHLTGGYRVLSYVDPAEPNHAPLKSLLFHLLTHRRQHVIPTFREVYGGLFGRMENDLARVGKADFGNYNDDAAFGFLCQALLGRDPVDSPLREEGPKLIAKWLLFQISPLLSLGLPTLVEDGLLHSFRLPPALIKKDYGRLADFFRDAGKAVIDEGERLGIAREEAVHNILFAMCFNSFGGIKILFPSLVKWLGRAGGRVHGRLATEVRAAVRANGGEVTMQALAEMPLVKSAVYEALRIEPPVAMQYGRAKRDMVVESHDYGYE…
240	244	chr5	260484367	260484489	-1	pseudogene fragment aa 250-290	1 aa diff to CYP74E7_6D	chr5_260484367_-1	chr5_260484367_-1_Aegilops_tauschii	CYP74E7_6D_Triticum_aestivum	97	41	1 aa diff	CYP74E7-fragment	VRRDYADLTAYFAEAAAGVLNDADKAQSGISCDELLHNLVF
241	245	chr5	524379338	524379460	1	pseudogene fragment aa 250-290	100% to CYP74E7_6D	chr5_524379338_1	chr5_524379338_1_Aegilops_tauschii	CYP74E7_6D_Triticum_aestivum	100	41		CYP74E7-fragment	VRRDYADLTAYFAEAAAGVLNDADKAQSGISRDELLHNLVF
242	246	chr6	183267447	183268922	1		100% to CYP74E7_6D	chr6_183267447_1	chr6_183267447_1_Aegilops_tauschii	CYP74E7_6D_Triticum_aestivum	100	490		CYP74E7	MTSKVANSSGSNNADAKLSPSGLPVREVPGGYGVPFLSPLRDRLDYYYFQGAEEYFRSRIARNGGATVLRVNMPPGPFITTDSRVVAFLDARSFSVLLDDAKVDKTDTLDGTFMPSLALFGGYRPLAFLDAADPHHAALKRVMISLAAARMHHVAPAFRTAFGAVFDAADAGLGDGPVQFNKLNEHHMFDFTCSALFGGTPPSKAMGDGAVTKAIKWLGVQLHPLASKIIKPWLLEDLLLHTFRLPPLLVRRDYADLTAYFAEAAAGVLNDADKAQSGISRDELLHNLVFTAIFNAYGGFKIFLPHVIKWLARAGPALHARLASEVRAAVPNGSDITVPAVDKMPLVKSVVWEALRMNPPVEFQYGRARQDLVVESHDAAYRVRKGEMLFGYQPLATRD…
243	247	chr6	362925335	362925457	-1	pseudogene fragment aa 250-291	100% to CYP74E7_6D	chr6_362925335_-1	chr6_362925335_-1_Aegilops_tauschii	CYP74E7_6D_Triticum_aestivum	100	41		CYP74E7-fragment	VRRDYADLTAYFAEAAAGVLNDADKAQSGISRDELLHNLVF
244	248	chr6	12390673		1		CYP74	chr6_12390673_1	chr6_12390673_1_Aegilops_tauschii	CYP74F5_6B_Triticum_aestivum	96	481		CYP74F5	MLPSFSPAATAVATPPPKPIPGGYGAPVLGPLRDRLDYFWFQGPEEFFRRRAAQYRSTVFRANIPPTFPFFVGVNPRVVAIVDTAAFTALFDPELVDKRDCLIGPYNPSDSFTGGTRVGVYLDTEEPEHERTKAFAMDLLRRSSRVWAPEFLEGVDDMLAAIESDLAAGKEGGASFLVPLQKCIFRFLCRAVASADPAAEDLVDRYGLFILDVWLGLQLVPTQKIGAIPQPLEELLLHSFPFPSILVKPGYDLLYRFVEKHGAASVAVGVKDHGMSDKDAINNILFLLGFNAFGGFSVFLPFLILQAGKDAALRAKLRDEVRAALERHAGEVGFASVRAMPLVRSTVYEVLRMNPPVPLQFGRARRDFVLRSHGGEGFSVAAGEMLCGYQPLAMRDPAV…
245	249	chr2	595732384		-1			chr2_595732384_-1	chr2_595732384_-1_Aegilops_tauschii	CYP75A79_2D_Triticum_aestivum(wheat)	99.61	511		CYP75A79	MQLAAVCTDPWVLSGTALVVLVHLVLRHFRSGGRRLPPGPRGFPILGALPLVGPTPHTGLAALARKHGPVMYLKMGTCGVVVASSPAAARQFLKVQDARFADRPAVASAVDITYGFQTIAFGMQGPRWKQMRKLSTVHLLGAQAMSEWASVRRDEAGRLLRDVAGASAAGELVSVPDVLVRAFANIIGQITLSKRLFDTQGDEANRYKEMITLVQSGSGLFNISDFVPALSRFDLQGVQAKLRKIHLRFDDMITSLLDEHSATAKQRQGRPDFIDKLRASMADNKDSNDADTISEVNVKGFVFDMFTAGTDTASIIAEWAMAEMIKNPSITARAQEEMDRVVGRGRRLEESDVASLPYLQAVCKEAMRLHPSTPLSIPHFSAEECEVDGYHIPRNTQLL…
246	250	chr6	3042899		1			chr6_3042899_1	chr6_3042899_1_Aegilops_tauschii	CYP75A81_6D_Triticum_aestivum(wheat)	99.42	513		CYP75A81	MQLAAVCTDPFVICCTFMCLLLHLALRSLNPNSASGRRLPPGPRGVPVLGALPLVGPAPHSGLLALARKYGPVMYLRMGTCGVVVASSPSAARTFLKALDQRFANRPAVASAEDMSYGCQNMVFANYGPKWKLLRKLSSVHLLGASAVAGWASVRRDEAGRALRAVLEAADAGRPVVVPEMLVCALANIVGQITVSKRVFDAQGDESNTYKEMIKSLLTGTGLFNISDFVPALSWLDLQGVQAKLRRIHIQFDGLVTKWLAEHAATAEDRLREGRLDFVDKLRAINDDEGGETITEVNIKGLITDMFTAGTDTSSIIVEWAMAEMIKSPSIMARAQEEMDRVIGRDRRLEESDIANLPYLQAICKEAMRLHPSTPLSLPHFSFEECEVDGHHVPANTRL…
247	251	chr7	18370887		-1			chr7_18370887_-1	chr7_18370887_-1_Aegilops_tauschii	CYP75A85_7D_Triticum_aestivum(wheat)	97.46	512		CYP75A85	MQLAALCTDPFVLSCTLLCLLLHLALRHSLNRSSRLPPGPPGVPILGAMPFVGPAPHTGLAALARKYGPVMYLRMGTCGVVVASSPSAARTFLKALDARFANRPAVASAADITYGRQNMVFANYGPKWKLMRKLASVHLLGARAVADWASVRRDEAGRALRGMAEAAEAGRAVVVPEVLVCALANIVGQITVSKRVFDAQGDESSSYKEMIVSLLTGTGLFNISDFVPALSRLDLQGVQARLRRVHRQFDGLITKLLAEHAATAEQRAREGRLDFVDRLRASSKDGDGDGETITEVNIKGLIFDMFTAGTDTSSIIVEWAMAEMINNPSIMARAQEEMDHVIGRDRRIEESDIANLPYLQAICKEAMRLHPSTPLSLPHFSFEECEVDGHHVPANTRLL…
248	252	chr7	18416387		1	last exon only		chr7_18416387_1	chr7_18416387_1_Aegilops_tauschii	CYP75A85_7D_Triticum_aestivum(wheat)	94.71	208	cannot find the first exon	CYP75A-fragment1	DMFTAGTDTSSIIVEWAMAEMINNPSIMGRAQEEMDRVIGLHRRLEESEIANLPYLQAICKEAMRLHPSTPLSLPHFSFKECEVDGHHVPANTRLLINIWAIGRDPAAWEDPLEFRPERSLSGPAAKIDPMGNNFELIPFGAGRRICAGKLAGMVFVQYFLGTLVHAFEWRLPDGEEKVDMAETFGLALPKAVLLKAVVTPRLVPAAYA
249	253	chr6	471105482		-1			chr6_471105482_-1	chr6_471105482_-1_Aegilops_tauschii	CYP75A87_6D_Triticum_aestivum(wheat)	99.05	525		CYP75A87	MATTGNGRSIHQSRIGMVDITTESHSQIRPIKAFTSSLHDTRSTSTMESGSATTITIQELVVLAIMYVVLHYLTRTILRTKRASPLPLAPGPRGYPVVGALPLLGRAPHRALADLARLHGPIMHLTLGRQGVVVASTPDAARLFLRDHGGSFLDRPADDVAPTVLAYGAQDLVFAPYGPRWRRLRRECSLGLLGPQALADWADARREEVGRMVRAMSRRGAGTAVEVPEFLFCAMANIIGQAVVGRRVLDEAGGEEAREFKEMVVELMTTAGLVNLGDFLPAVAWMDLQGLGRRMRRLSARLDRVWSGLLSEHEATMADRDREQERRGRQPDLVDRLIACRGDARAGEDGVTDLNIKALLNNLFTAGTDTSSSTIEWALAEMLANPAILRRAQAEMDGV…
250	254	chr6	471247538		1	pseudogene		chr6_471247538_1	chr6_471247538_1_Aegilops_tauschii	CYP75A87_6D_Triticum_aestivum(wheat)	92.06	403		CYP75A96P	MATTGNGRIDQSRLGMVDFTRESHSQICTIKAFTSSxxHDTRSTTMESGMFQEFVVLAILYVLLHYLTGTIFLRTKRAXxxGAQDLVFAPYGPRWRRLRRECSLGLLAPQALADWADAGREEVGLMVRAMSRRGAGTAVEVPEILFCAMANMIGQAVVGRPVLDEAGGEEAREFKEMVVELMTTAGLVNLGDFLPAVAWMDLQGLGRRMRRLSARLDRVWSRLLSEHEGSDRQQEGRGRHPDLVDRLIACRGDARAVEDGVTDLNIKALLNNLFTAGTDTSSSTIAWALAEMLANPAILRRAQAEMDAVVGRDRLLEESDVPRLPYLRAICKETFRLHPSTPLSLPRLSTEPCTVQGYLIPEGTRLLVNICAIGRDPAVWAEPARFDPGRFTTEKASKV…
251	255	chr4	389266555		1	missing the C-term exon		chr4_389266555_1	chr4_389266555_1_Aegilops_tauschii	CYP75A88_4D_Triticum_aestivum(wheat)	99.79	466	cannot find the last exon	CYP75A88	MELGSSATMSRELVVLAFTYVLVHYLTGVILRSKRASLPLPPGPRGYPVVGALPLLGRAPHRALAALARLHGPIMHLTLGRQGLVVASTPESARLLLKDHGGSFLDRPVDDAGPMVLAYGAQDLVFAPYGPKWRRLRRECSAGLLGPKALADWADTRHEEVGRMVRAMSRRGEALEVPEFLFAAMANMIGQAVVGRRVLDEAGGEATREFKEMVVELMTTAGLVNIGDFVPAVAWMDLQGLGRRMRRLTTRLDRAWSRLLSDHEVAMANRKQDGSRRTDLVDRLIACRDHAEDVGDGVTDLNIKAVLNNLFTAGTDTSSSTIEWALTEMLVNSAILQQAQAEMDEVVGRDRLLQESDIRHLPYLRAICKETFRKHPSTPLNLPRISTEPCKVQGYHIPK…
252	256	chr1	498750308		-1			chr1_498750308_-1	chr1_498750308_-1_Aegilops_tauschii	CYP75B121_1D_Triticum_aestivum(wheat)	99.78	460		CYP75B121	MAALARLHGPLFRLRFGSAEVVVAASAKVAGSFLRAHDANFSDRPPNSGAEHVAYNYQDLVFAPYGARWRALRKLCAQHLFSARALDALRTVRQDEARLMVTRLLSSSDSPAGLAVGQEANVCATNALALAAVGRRVFGDGVGEGAREFKDMVVELMQLAGVFNIGDFVPALRWLDPQGVVAKMKRLHRRYDRMMDGFISERGDRADGDGNDLLSVMLGMMRQSPPAGGEEDGIKFNETDIKALLLNLFTAGTDTTSSTVEWALAELIRHPDVLKKLQHELDDVVGNGRLVTESDLPQLTFLAAVIKETFRLHPSTPLSLPRVAAEDCEVDGYRIPKDTTLLVNVWAIARDPASWGDDVLEFRPTRFLPGGSHESVDVKGGDYELIPFGAGRRICAGLS…
253	257	chr6	5642232		1			chr6_5642232_1	chr6_5642232_1_Aegilops_tauschii	CYP75B123_6D_Triticum_aestivum(wheat)	99.62	520		CYP75B123	MEIPLPLLLSTFAISVTICYVILFFRADMGRAPLPPGPRGWPVLGNLPQLGGKTHKTLHEMARLYGPMLRLRFGSSLVVVAGSADVAKLFLRTHDAKFSSRPPNSGGEHMAYNYQDVVFAPYGPRWRAMRKVCAVNLFSARALDDLRAFREWEAALMVRCLADAAAAGMAVALGKAANVCTTNALSRATVGLRVFATAGSELGAEEFNEIVLKLIEVGGVLNVGDFVPALRWLDPQGVVAKMKKLHRRFDDMMNRIIAERRAGAFATTASEEGGKDLIGLLLAMVQEDKSLTGAEENKITDTDVKALILNLFVAGTDTTSITVEWAMAELIRHPDIMKQAQEELDAIVGRERLVSESDLPRLTFLSAIIKETFRLHPSTPLSLPRMATEECEVAGYCIP…
254	258	chr6	5649856		1			chr6_5649856_1	chr6_5649856_1_Aegilops_tauschii	CYP75B124-fragment_6D_Triticum_aestivum	100	211		CYP75B124	MEIPLPLLLSTFAISVTICYVILFFRADMGRAPLPPGPRGWPVLGNLPQLGGKTHKTLHEMARLYGPMLRLRFGSSLVVVAGSADVAKLFLRTHDAKFSSRPPNSGGEHMAYNYQDVVFAPYGPRWRAMRKVCAVNLFSARALDDLRAFREWEAALMVRCLADAAAAGMAVALGKAANVCTTNALSRATVGLRVFATAGSELGAEEFNEIVLKLIEVGGVLNVGDFVPALRWLDPQGVVAKMKKLHRRFDDMMNRIIAERRAGAFATTASEEGGKDLIGLLLAMVQEDKSLTGAEENKITDTDVKALILNLFVAGTDTTLIMVEWAMAELIRHPDTLKQAQEELDTIVGRERLISESHLPRLTFLSAVIKDTFRLHPSTPLLLLRMATEECETAGYRIP…
255	259	chr7	523852586		-1			chr7_523852586_-1	chr7_523852586_-1_Aegilops_tauschii	CYP75B125_7D_Triticum_aestivum(wheat)	99.81	521		CYP75B125	MDIPLPLLLSTLAVAVTICYVLFFRADKGRAPLPPGPRGWPVLGNLPQLGGKTHQTMHEMSKVYGPVLRLRFGSSVVVVAGSAAVAEQFLRTHDAKFSSRPPNSGGEHMAYNYQDVVFAPYGPRWRAMRKVCAVNLFSARALDDLRGFREREAAFMVRSLADAASGGGLVAVGKAANVCTTNALSRAAVGLRVFAAAGTELGAKEFKEIVLEVMEVGGVLNVGDFVPALRWLDPQGVVARLKKLHRRFDDMMNGIIAERRAGAGTAGEEKEGKDLLGLLLAMVQEDKSLTGGEEDRITDTDVKALILNLFVAGTETTSTIVEWAVAELIRHPDMLKRAQEEMDAVVGRGRLVAESDLPRLTFLNAVIKETFRLHPSTPLSLPRMASEECEVAGYRIPKG…
257	260	chr7	8050533		-1			chr7_8050533_-1	chr7_8050533_-1_Aegilops_tauschii	CYP76H2 Triticum aestivum	99.8	498		CYP76H2	MELLFFCTIVLILMVSSVYLLGLLTHSGRNLPPGPRSLPLVGNLLSLGALPHRSLAGLAERHGPIMALRLGTVTTVVASSADAARDILQRHDAAFSGRFVLDGTHVSAHYTHSMVWLPASSPRWRALRKVCSGELFAPHRLDMHQSLRQEKVHQLVSHVTQLAREGVPVHVGHLAFTTALNLLSSTIFSTDLADLDDRHVKLGEFKAVLAELNVTVGLPNLSDFIPEVAWLDLQGVRRRIEGLFQRLHAMMDEHIELHMRNRAAGEPTKKNFLDVLLDYRNTDDDQGFERQTLLSLLSDLFSAGTDTSSATVEWAMAELLLNPSSMSRARQELDQVIGSKEQVEESDIGQLKYLQAIVKETFRLHPPAPFLLPHVAETTTQVQGYTIPKGTRLLVNVWA…
261	261	chr2	621132375		-1	contains one stop codon, possible pseudogene		chr2_621132375_-1	chr2_621132375_-1_Aegilops_tauschii	CYP76H36_2D_Triticum_aestivum(wheat)	99.8	500		CYP76H36P	MVAVAVLAPWLAWLVVSLLSVYLLNLLTHARSGLPPGPRPLPLIGSLHLLGDRPHRSLARLARTHSAPLMSLRLGAVTTVVASSPAMAREFLQRHDAAFAARSVPDATGMHAAGSVPWLPPAPRWRALRKMMATELFAPHRLDALHHLRSEKVGELMDHVARLARDGKPVNVGRVAFTTSLNLLSRTIFSHDLTSLDDDSRSGEFQEVVTAIMEAVGTPNVSDFFPVLAPADLQGTRRRLARLFARLHVVFDAEVDQRLRARDAGQPRKNDFLDVLLDVAAREDGKDLLDRQTLRSLFTDLFAAGSDTSSSTVEWAMTELLQNPSSLAKACNELEQVIGRRRNIEEADILRLPYIQAIIKEIFRLHPPAPLLLPRQPEATLKIAGYTIPKGSRIFINIW…
269	262	chr2	621090141		1			chr2_621090141_1	chr2_621090141_1_Aegilops_tauschii	CYP76H39_2D_Triticum_aestivum(wheat)	99.81	523		CYP76H39	MCCTCTPNCTTEAMVAMAVLAPWLAWLVISLLSLYLLNLLAHARSGLPPGPRPLPLIGSLHLLGDKPHRSLAHLAKIHGPLMSVRLGAVTTVVVSSPAMAREFLQRHDSVLATRSVPDATGKHAAGVAWLPPGPRWRALRKIMATELFAPHRLDALHHLRSDKVRVLTDHVARLAREGMAVNVGRVAFTTSLNLISRTIFSIDLTSLDDHGRSEDFQQVITAMMEGLGTPNVSDFFPVLAPADLQGMRRRLARIFARLHAVFDAEVDQRLRGRDAGQPRKNDYLDVLLDVAARDDGKDLLDRDTLRSQFTDLFAAGSDTSSSTVEWAMAELLRNPSSMAKVCDDLAQVIGSRRNIEEADIVRLPYLQAVIKETFRLHPPAPLLLPRQPEMTVKIAGYTI…
265	263	chr2	621073071		1			chr2_621073071_1	chr2_621073071_1_Aegilops_tauschii	CYP76H40_2D_Triticum_aestivum(wheat)	100	499		CYP76H40	MVTVVVLVPWLAWLVVSLLSFYLLNLLAHARSGLPPGPRPLPLIGSLHLLGDKPHRSLARLAKIHGPLMSIRLGAVTTVVVSSPAMAREFLQKHDSVLATRSVPDATGKHAAGSVPWLPPAPKWRALRKMMATELFAPHRLDALHHLRSDKVRELTDHVARLAREGTAVNIGRVAFTTSLNLISRTIFSIDLTSLDDMSSSKEFQEVITAIMEGLGTPNLSDFFPVLAPADLQGMRRRLARLFARLHAVFDAEVDQRLHGRDAGQPRKNDFLDVLLDVAAREDGKDLLDRETLRSHFTDLFAAGSDTSSSTVEWAMTELLQNPSSMAMVCDELAQVIGSRRNIEEADISRLPYLQAVIKETFRLHPPAPLLLPRQPETTVKIAGCTIPKGSRVFINVWA…
267	264	chr3	486216046		1			chr3_486216046_1	chr3_486216046_1_Aegilops_tauschii	CYP76H42_3A_Triticum_aestivum(wheat)	93.56	497		CYP76H42	MELFLYATYALLLVFSLYVLRHFAGARRNLPPGPPSWPLIGNLLDLGAQPHRSLARLAERHGPLMTLRLGALTTVIASTADTARDVLQRHDAAFSARSVSDAARACAYDSLSMGWLPPSSPHWRALRKLCSGELFAPHRLDAHQSIRREKVQQLVSHVARLSREGAAVDVSRVVFTTALNLLSCTIFSADIADLDDREGTGQFRAVIASFTEVVGLPNLSDFFPAVAPLDPQRLRKRLAAVFMRLHAIFDEQIERRMRQRTAGEPPKDDFLDVLLDYRGLEDGRGLDREMLRALLADLFIAGSDTSATTFEWAMAELLQNPSAMAKTREELAQVIGSKSEIEESDICRLEYLQAVVKEVFRLHPPAPFLIPRQAEATTQVKGYTVPKDARVMVNVWAIG…
268	265	chr7	41788630		1			chr7_41788630_1	chr7_41788630_1_Aegilops_tauschii	CYP76H46_7D_Triticum_aestivum(wheat)	98.44	514		CYP76H46	MASLLPWLPWLVVPLLFFYLLDILAQVCRRGLPPGPRPLPLIGSLHLLGDQPHRSLARLARTHGPLMSLRLGAVTTVVVSSPDAAREFLQKHDAVFATRAVQDAVGAHARSSVAWLPHAPRWRSLRRIMATELFAPHRLDALQRLRAEKVRELAAHVARLARDGAAVDIGRVAFTTSLNLLSRTVFSTDVTSLDDHGGSKGFQVLVAEIMEVAGSPNVSDFFPALAAADLQGLRRRMARLFARLHLVFDREVDQRLGRRARDAAGEPRKKNDDNDGGDFLDVLLDVAERDDGQTALLDRDTLRSLFSDLFAAGSDTTSSTVEWAMAELLQNPSSMAKAHDELARVIGSGRDIGEPDIDRLPYLQAVIKETFRLHPPAPLLLPRQAQTTIRITGYTIPKG…
270	266	chr7	535973589		-1	pseudogene		chr7_535973589_-1	chr7_535973589_-1_Aegilops_tauschii	CYP76H47_7D_Triticum_aestivum(wheat)	98.56	209		CYP76H47P	YLFAAGSDTSSSTVEWAMAELLRNPSSMAKVCDKLAQVIVSRRNIEEADIVRLPYLQAVIKETFRLHPPAPLLLPRQPEMTVKIAGYTIPKGSRVFINVWARGRDKDVWTEPEKFMPGRFLGSAIDFKGVDFELLPFGAGRRICPGMALAIRMVHVMLASMLNQFKWSLPVELEWDGIDMEDQFGLTLVKAVPLCAMATLIRGKEKEPF
262	267	chr7	535958509		1	pseudogene		chr7_535958509_1	chr7_535958509_1_Aegilops_tauschii	CYP76H36_2B_Triticum_aestivum(wheat)	89.81	265		CYP76H50P	MVAVAVLAPWLAWLVVSLLSVYLLNLLTHARSGLPPGPRPLPLIGSLHLLGDRPHRSLARLARTHGAPLMSLRLGSVTTEVASSPAMAREFLQRHDAAFATRSVPDATGMHAAGSVPWLPPASRWRALRKMMATELFTPHRLRSEKVGELMDHVARLARDGKPVNVGRVAFTTSLNLLSRTIFSHDLTNLDDDNRSGEFQEVVTGIMDEAVGTPNVSDFFPMLAPADLQGTRRRLARLFARLHVVFDAEVEHRLRTRDAPLLLPR*PEATLKIAGYTIPKGSRIFINVWAIGRDKDVWDEPDKFMPERYLGSTVDFRGADFELLPFGVGRRICPGMTLATRMVHLMLASLLHQFKWSLPIELERDGIDMEDKFGLTLTKVVPLRIVATPV
263	268	chr7	536025336		-1	pseudogene		chr7_536025336_-1	chr7_536025336_-1_Aegilops_tauschii	CYP76H37_2A_Triticum_aestivum(wheat)	89.05	201		CYP76H51P	DLFAAGSDTSSSTVEWAMTELLQNPSSLAKVCDVLAQISGSRRNIEEVDIVRLPYLQAVIKETF*LHPPAPLLLPRQPEMTVKIAGCTIPKGSRVFINVWAIGRDKDVWTEPEKFMPEGFLCSAIDFRDVNFELLPLGVGRRICPGMALANRMVHGMLAPLLNQFKWSLPVELERGGIDMKYQFGLTLAKVVPLCIMATPI
260	269	chr2	621185175		-1	pseudogene		chr2_621185175_-1	chr2_621185175_-1_Aegilops_tauschii	CYP76H39_2B_Triticum_aestivum(wheat)	84.58	201		CYP76H52P	DLFAAGSDTNSSTVEWAMAELLQNQSSMTKVCDELAQVIGARKNIEEADIARLPYLQAVIKETLRLHPPAPLLLPRQTKTTGRGYTIPMGSRLFINVWAIGRDKDVWTEPEKFMPERFLGPTIDFRGMDFELLPFGAGRRICPGITLAIRMVHVMLASLLNQFRWSLPVEMEHDGIDMEDQFGITLAKVVPLCIIAAPI
259	270	chr7	535901430		-1	pseudogene		chr7_535901430_1-	chr7_535901430_1-_Aegilops_tauschii	CYP76H39_2D_Triticum_aestivum(wheat)	91.04	201		CYP76H53P	DLFAGGSDTSSSIVEWAMVELLRNPSSMAKVCDELAQVIGSRRNIEEADIVRLPYLQVVIKETFRLHPPAPLLLP**PEMTVKIASYTIPKGSRMFINVWAIGRDKDVWTEPEKFMPERFLGSAVDFKGVDFELLPFGAGRRIYPGMALAIRMVHVMLASMLNQFRWSLPVELKRDGIDMEDQFGLTLVKVVPLCATATPI
266	271	chr7	535946228		1	pseudogene		chr7_535946228_1	chr7_535946228_1_Aegilops_tauschii	CYP76H40_2D_Triticum_aestivum(wheat)	82.59	201		CYP76H54P	DLFAAGSDTNSSTVEWAMTELLQNQSSMTKICDELAQVIDARKKIEEADIARLPYLQAVIKETLRLHPPAPPLLPRQAKVMVKIEGYTIPMGSRLFINIWAIGRDKDVWTEPEKFMPERFLGSTIDFRGMDFELLPFGAGRQICPGITLTIRMVHVMLASLLNQFRWSLPVEMEHDGIDMEDQFGITAKVVHLCIIATPI
264	272	chr7	536106301		-1	pseudogene		chr7_536106301_-1	chr7_536106301_-1_Aegilops_tauschii	CYP76H40_2D_Triticum_aestivum(wheat)	94.42	215		CYP76H55P	KNLLDRETLRSHFTDLFAAGSDTSSNTVEWAMTELLQNPSSMAKVCDELAQVIGSRRNIEEADIVRLPYLQAVIKETFRLHPPAPLLLPRQPEMTVKIAGCTIPKGSRVFINVWAIGRDKDVWTEPEKFMPERFLGSTIDFRGVDFELLPFGARRRICPGMALAIRMVHVMLASLLNQFKWSLPVELERDGIDMDDQFDLTLAKVVPLCIIAPPI
258	273	chr3	486205709		1			chr3_486205709_1	chr3_486205709_1_Aegilops_tauschii	CYP76H42_3A_Triticum_aestivum(wheat)	89.74	497		CYP76H56	MELVLYATCILLVVSSLYVLRHFADSRRNLPPGPPSWPLIGNLLDLGALPHRSLARLAERHGPLMTLRLGALTTVIASTADTARDVLQRHDAAFSARSVPDAVRACAYDSLSMGWLPPSSPHWRALRKLCSGELFAPHRLDAHQSIRREKVQQLVSHVDRLSREGAPVDISLVVFTTALNLLSCTIFSADIADLDDIGGSGQFMAVISESLQVAGQPNLSDFFPAVAPLDPQRLRKRLAVGFKRLHAILDEQIERRMRERTAGEPPKNDFMDVLLDYRGLEDGRGLDREMLRALLMDLFIAGSDTSAATFEWAMAELLQNPSSMAKAREELAQVIGSRSEIEESDIGQLKYLQAIVKEVFRLHPPAPLLLPRQAEATTELRGYMVPKGARVMVNVWAIG…
271	274	chr5	354669780		-1			chr5_354669780_-1	chr5_354669780_-1_Aegilops_tauschii	CYP76K3_5D_Triticum_aestivum(wheat)	99.8	506		CYP76K3	MEPTPLSVCISLLCIALLCLLWNKSTKPPAGAPAPPPPPGPTPFPVIGNIPNLVRGGELHRALARLSASYGPVMSMRLGMASLVVLSSPATAHEALHKKEGAVSSRWVPDSASVMGHSGISMVWLPSSSPLWKHLRTVASTLLFTSRRLGASRAIQERKARELVDHLHASSGRPVRVALPVFSAVLNMLSSVLFSEDVVELGSVTGQEFMVLIADSVAETARPNISDFFPFLSSLDLSRRRRAVAANLSRFYQFFDAVIDRRLNSAEKPGDLLESLLELPAKSQLERPVIRALLTDLFIAGSHTTTTTVEWAMAELLRNPTKMAKARAELREAFGSGNAEEGDLANLPYLQAVMKETMRLHPPAPLLLPHEVSETGVTLGGCSVPKGARVLINVWAIGR…
272	275	chr5	354565336		1			chr5_354568059_1	chr5_354568059_1_Aegilops_tauschii	CYP76L6_5D_Triticum_aestivum(wheat)	100	501		CYP76L6	METSTILWLLYVSAACCILYKVFVRGKNSLKTSSSYARRPPGPAPIPFIGNIFHLQGEPHHALARLAGVYGPVMSLKLGTTTAIIASSASGARDILQKYDHLLAARSITDAGRALGNHERSIVWLPCTSPLWKRLRAVCTNHLFSARGLDATRAVREEKVRELVGSLRAHHAGEAVDVGRVVFSGVLNLVSNVLFSEDVADMSSDRAQELEVLIRGMVEEFTKPNLSDLFPVLSALDLQGRRRRTTQYLRRFNDFFDPIIRRRMKYEGERKDDFLDVLLQLHSVDQLSLEALNCFLSDLFVSGAETNSITVEWTMAELLRQPAVMSKVRAELRETLGPKQHPDESDVDRMPYLRAVVMETMRLHPPSPLLMPHEAMADGAEVGGFAVSKGTKLIVNLWA…
273	276	chr5	287929662		-1			chr5_287929662_-1	chr5_287929662_-1_Aegilops_tauschii	CYP76L7_5D_Triticum_aestivum(wheat)	99.8	494		CYP76L7	MEASYTLWLVYVSLASFVLCKVFVLGKKNSRLPPGPTPIPLLGNIFDIQGDLHQALARLAGVHGPIISIKLGATTAVVASSAACARDVLQKYDHLLAGRSVADAARALGFHERSIIWLPSTSPLWKRLRAVCTNHLFSAHGLDAARAVREEKVRDLVGCIRGHAGETVDVGRVVLSGLFNLVSSVLFSEEVGDVSSDQAQGLETLIDDILVELIKPNLSDLFPALSVLDLQRRRRRTGECLGRFFDYFDQIIDRRMKAGGERKGDFLDVLLQLHSVDQLSIETIKSFLLDLFIAGTETNSLTVQWAMAELLRHPAVMSKVRAELQEVLGEKQYPDESDISRLSYLHAVLMESMRLHSPSPLLIPHHAMAEGAEVGGFVVPKGTTVIVNLWAIMRDPAVW…
274	277	chr5	287788816		-1			chr5_287788816_-1	chr5_287788816_-1_Aegilops_tauschii	CYP76L8_5D_Triticum_aestivum	100	487		CYP76L8	MGLCTFHSPLVSSTVFLVGRKSSRLPPGPTPIPLLGNIFDIQGDLHQALTRLARVHGPIISIKLGATTAVVASSAACARDVLQKYDHLLAARSVADAARTLGNHERSIIWLPSSSPLWKRLRAVCTNHLFSAHALDAARAVREEKVRGLVGCIRGHAGETVEVGRVVLSGLFNIVSSVLFSEEVGDLSSDRAQGLETLTNDLLMELIKPNMSYLFPVLSVLDLQGRRRRTVEHLRRFFDFFDPIIERRMMAGGERQGDFLDVLLQLHSVDQLSIQTIKSFLLDLFIAGTETNALTVEWTMAELLRHPAVMSKVRAKLQEVVGAEQYPDESNISRLPYLQAVLMESMRLHPPSPLLIPHQAMAEGAEVGGFVVPKGAMVIVNLWAIMRDPATWTQPEEFM…
277	278	chr2	4349296	4350792	-1	partial match, wheat seq is missing N-term		chr2_4356241_-1	chr2_4356241_-1_Aegilops_tauschii	CYP76M26_2A_Triticum_aestivum	94	385		CYP76M26	MEIVLWLLWPTLAVVSLLYCLAHTRCAGTGRMPPGPTPLPLVGNVLSLGGNLHHTLARLARAYGPVMTLKLGLTTAVIVSSRDAAWEAFAKHDRRLAARAIPDAARALGFSDRSMIWLPSSDPLWKSLRGIVATNVFSPRGLAVALEVRERKVRDMVSYFRGRAGTELDVGQALYGGVLNLVSSSFCSVDVVDMGGESAQGVRKLVEDLIEVIAKPNVSDLFPFLGPLDLQGWRRWTEIRFEKIFLILDGIIDRRMAAANASTEKHCDFLDSLLELFSTGKMARGSLTTIVFEVIAAGSDAMSITLEWAMAELLRNPSVMAKVRAEVDDALGGKETFGEADAASLPYLQAVVKEAMRLHPVAAILLPHRAVEEGVEIGGYTVPNGSTVIFNAWAIMRDP…
278	279	chr2	4357321	4355783	1			chr2_4350457_1	chr2_4350457_1_Aegilops_tauschii	CYP76M27_2A_Triticum_aestivum(wheat)	93.55	512		CYP76M27	MEIELWLLWPTLAVVSLLYCMAITARTRRAGTGRMPPGPTPLPLVGNMLSLGGNLHHTLAHLARAYGPVMTLKLGLTTAVIVSSRDAAWEAFTKHDRRLAAHAIPDAARALGHSDRSMIWLPSSDPLWKSLRGIVAANVFSPRGLAAARAARERKVRDMVSYFRDRADTEVDVGQALYGGVLNVLSNALCSVDVVDMGAAESAQRVRELVEDLIAVIAKPNISDLVPCLRRLDLQGWRRWTAIRIDKIFRLLDDIIDGRMAAAANTSTEEKHGDFLELFCTGKIARDTLTAILFDVFTAGSDTMSLTVEWAMAELLKNPAIMAKVRAEIDDALGGKETIGENDAAGLPYLQAVVKEAMRLHPVVPILLPRRAVEDGVEIGGYAVPKGSTVIFNAWAMMR…
279	280	chr2	248227962		-1			chr2_248227962_-1	chr2_248227962_-1_Aegilops_tauschii	CYP76M28_2D_Triticum_aestivum(wheat)	99.4	501		CYP76M28	MQSEVWLLWATLAAALLYYLTAARRGGTGGRQPPGPTPLPVLGNLLDVGGNLHHTLARLARAHGPFMKLKLGLVTTVVVSSRDAAREAYTRYDRHLAARAAPNAANAVGNSGWSMIWLPSSDPLSKTLRGIVASHIFSPRGLTTARGVRERKVHDMAGYFRRRAGEEVDDRQAVYGSVLNLVSSAFFSVDVADVGGESASGLREVVEDIIAAFAKPNISDIFPFLRPLDLQGWCRWAGARYQKVFGILDGIIDRRLADAQTSTGEHAHGNFLDSLLELVSAGKIGRDKVTVILFDVFAAGTDMMAITVEWAMAELLRHPRAMAKVHAEMEDILGGKDTDTLEEPDAANLPYLQAVVKEVMRLHPVVPIMLPHQVAEDGMEIGGFAVPKGSMVIFNVWAI…
280	281	chr7	56728902		-1			chr7_56728902_-1	chr7_56728902_-1_Aegilops_tauschii	CYP76M30_7D_Triticum_aestivum(wheat)	98.62	506		CYP76M30	MEIELWPIWATLAVASLLYFLASPARRAGTGGGRIPPGPTPLPLVGNLLCLRRGNLHHTLARHARAHGPVMTLRLGLTTAVVVSSRDAAREAFTRHDRRLAARAVPDAARGLGFADRSMLWLPSSDPLWKSLRGIVAAHAFSPRALAAARGVRERKVRDMVSYFRGRAGREVDVGQVMYAGVLNLVSSALCSVDVVDMGAAESGQGMRELVEDLVAVIAKPNISDLVPFLRRLDLQGWRRWSAMRIEKILLILDGIIDRRMANTSTEEKLSHGDFLDSLLELFSTGKIARDGLTAILFDLFTAGSDTMALTVEWAMAELLRNPGVMAKVRAEIHDALGGKESIGETDVAGLPYLQAVLKEAMRLHPVGPILLPHRAVEEGVEIGGYAVPEGSTVIFNAW…
283	282	chr6	32884888		1			chr6_32884888_1	chr6_32884888_1_Aegilops_tauschii	CYP76M31_6B_Triticum_aestivum(wheat)	95.22	502	96% to CYP76M31_U_Triticum_aestivum, 94% to chr6_33062797	CYP76M31	MQSEAWLLWATLAAALLYHLTSAARSGGTGGRQPPGPTPLPVLGNLLDLGGNLHHTLARLARAHGPVMKLKLGLVTTVVVSSRDAAREAYTRYDRHLAARAVPDAANAVGNSGRSMIWLPSSDPLWKTLRGIVASHIFSPRGLAAARGVRERKVRDMVGYFRRHAGEEVDVGQAVYGGVLNLVSSAFFSVDVVDVGGESASGLREVVEDIIAALAKPNVSDIFPFLRPLDLQGWRRWAGARYQKVFGILDGIIDRRLADARTSKGEHAHGDFLDSLLELVSAGKIGRDKVTVILFDFAAGRDTMAITVEWAMAELLRHPHAMAKVRAEMADILGGKGTDTLEEPDAANLPYLQAVVKEVMRLHPVAPLMLPHQAAEDGVEIGGYAVPRGATVIFNVWAI…
275	283	chr6	16021262		-1			chr6_16021262_-1	chr6_16021262_-1_Aegilops_tauschii	CYP76M33_6D_Triticum_aestivum(wheat)	99.25	402		CYP76M33	MAPEECLVWIALLAVPLLCYMMMYTRRGACRWPPGPRPWPILGNLLDLRGGNLHHNLARLAHTHGPVMTLKLGVVCTVIVSSQDAAWEAFAKHDRRIAARTVPDTRRAVAHADRSMVWLPSSDPLWKTLRGIAATHIFSPRSLASAQGARERTMNHILYTFRRRAGQEVDIGHVLYHGMFDLLTNTLFSLDGQDKLRDILEDIVALLAEPNVSDLYPLLRVLDLQGLRRWTATHMNRVFHVLDKIIDTRLGEGNHDQDVLDTLLALMTTGKMSRRDVKTMLFDVLAAGTETTKITVEWAMAELLRNPGVMAAVRTEMKGTLTQTQGRMITEADVAKLPYLQAVVKESMRLHPVAPLLLPHLVEEEGVEIGGYTVPKGATVIFNSWSIMRDPAAWERPEE…
284	284	chr7	56749519		1			chr7_56749519_1	chr7_56749519_1_Aegilops_tauschii	CYP76M35_7D_Triticum_aestivum	99	439		CYP76M35	MEIELWLICATLAVVSLLYFLANPTRRAGTRRMPPGPTPLPVIGNVLSLRGGNLHHTLAGLARAHGPVMTLRLGLTTAVVVSSRDAAREAFTRHDRRLAARAVPDAARGLGFADRSMVWLPSSDPLWKSLRGIAAAHAFSPRALAAARGVRERKVRDMVGHFRGRAGREVDVGQALYAGVLNLVSSALCSVDVVDMGAAEPGQGVRELVEDLVAVIAKPNVSDLVPFLRGLDLQGWRRWSAIRIGKIFRILDGIIDRRMALTAAAANTSTEEKHGDFLDVLLELFSTGKIARDGLTAILFDLFSAGSDTMALTVEWAMAELLRNPGVMAKVRTEIDDTLGGKETIGETDAAGLPYLQAVVKEAMRLHPVAPILLPHRAVEEGVEIGGYAVPEGSTVIFN…
276	285	chr7	83645633		-1	pseudogene, C-term fragment		chr7_83645633_-1	chr7_83645633_-1_Aegilops_tauschii	CYP76M41P_7D_Triticum_aestivum	98	108		CYP76M41P	ERMITEADVVKLPYLQAAVKESMRLQPVAPLLLPHLVVEEGMEIGGYAVPKGAAIIFNSWSIMRDPATWERPEEFMPERFLGKTELGMWGKEVKFIPLGTGRRLCPALPMVELLVPFMVASMLHALEWRLPHGMPPDQVDVTERYTSNDILLMDVPLKVVPMVAT
281	286	chr2	248149978	248150277	1	pseudogene		chr2_248149981_1	chr2_248149981_1_Aegilops_tauschii	CYP76M31_6B_Triticum_aestivum(wheat)	84.07	113	95% to chr2_248147765	CYP76M42P	GSTVIFNMWAIMRDPKAWERAVEFVPERFLDKAAAVEFWGKDYEFIPFGSGRRLCPGPSMAERVVSFVLALLLHAFEWRLPGGVAADKLDVTEKFTTVNTLVVRLRAVLVVVT
281.1	287	chr2	248147765	248148064		adjacent C-term fragment		chr2_248147765_1	chr2_248147765_1_Aegilops_tauschii	CYP76M31_6B_Triticum_aestivum(wheat)	83.19	113		CYP76M43P	GSTVIFNMWAIMRDPEAWERAVEFVPERFLDKAAAVEFWGKDYEFIPFGSGRRLCPGPSMAERVVPFVLALRLQKFEWRLPGGVAADKLDVTEKFTTVNTLAVRLRAVLVVVT
282	288	chr6	33062797		1			chr6_33062797_1	chr6_33062797_1_Aegilops_tauschii	CYP76M31_6B_Triticum_aestivum(wheat)	95.02	502		CYP76M44	MQSELWVLCATLAAAFLYYLTSAARRGGTGGRQPPGPTPLPVLGNLLDLGGNLHHTLARLARAHGPVMKLKLGLVTTVVVSSRDAAREAFTRHDRQLAARAVPDAANAVGNSGRSMIWLPSSDPLWKTLRGIVASHIFSPRGLAAARGVRERKVRDMVGYFRRHAGEEVDVGQAVYGGVLNLVSSAFFSVDVVDVGGESASGLREVVEDIIAALAKPNVSDIFPFLRPLDLQGWRRWAGARYQKVFGILDGIIDRRLADARASTGEHAHGDFLDSLLELVSAGKIDRGKVTVILFDVFAAGTDTMAITVEWAMAELLRHPRAMAKARAEMEGILGGKDTDTLEEPDAASLPYLQAVVKEVMRLHPVAPIMLPHQAAEDGVEIGGFAVPRVATVVFNVWA…
285	289	chr7	19283403		1			chr7_19283403_1	chr7_19283403_1_Aegilops_tauschii	CYP76P15_1B_Triticum_aestivum(wheat)	68.1	511		CYP76P17	MFFLLVLASCFLLILFSSYVLGMLADARRRLPPGPMPLPVIGNLLHVASWLPHRSLARLAERYGPLMTVRLGTAVVIVASSPSAAREVLRTHNASITGRNAPDAWNGMGHAANSVFILPPGHRWRALRRIGTEHLLSPRQLDGLRPVMRGAVDRMLCHVSEMAAAVSAGAPVEVGRAVFAAMADLQWRAMFSSGLDAATTRELHAVAREAALLALKPNVSDFFPALAALDLQGIRRSMTRQLGKVYRLIDQEIDQRRRGREAGSVDGREKDDLLDVMLQMCEVDGAAVMNQDSMRAFLTDLFLAAIDTVSGAIEWAMAELLQNPETMKKLKEELSRVLGSKEHVEYSDNLPYLQAVVKETLRLHAVVPLAPNKVEQTVEIQGYTIPKGSTVIVNLWAIH…
286	290	chr1	30692453	30694856	-1			chr1_30692884_-1	chr1_30692884_-1_Aegilops_tauschii	CYP76P15_1D_Triticum_aestivum(wheat)	100	506		CYP76P15	MAFFLVLMSSLLFMLLSSYALQLLTDVRRRLPPGPTPLPVIGNLLDVVGKLPHRSLAQLAERYGPLMTLRLGTVVVIVASSAATAREVLQTHNTVLTGRNPPDAWNGMGHAANSVFVLPPRRRWRALRRIGAEHLLSPRRLDGDALRPLLRDAVLGMLGRVSELAASGAPVEVGHAAFASMMDLQWRAMFSAGLDEATSGELHGFAREAVAHSLRPNVSDFFPALAAADLQRVRRGFATHVARVYQLIDQQIEKRRNARQVGDGDARTDDLLDVMLDMSEEQGGKDVDDGLVNQDFMRAFFTDIFLAANDTVSGTIEWAMAELLQDPQSMTKLQQELKSVVGSKTHVEYSDIDQLPYLQAVVKETLRLHAVVPLVPNKAEATVKIQGHTVPKGSTVLVN…
287	291	chr2	586616244		-1			chr2_586616244_-1	chr2_586616244_-1_Aegilops_tauschii	CYP76Q4_2D_Triticum_aestivum(wheat)	96.37	523		CYP76Q4	MASFLVECLGWLIVVLFSLYIFQLLRDARRRLPPGPWPPKPIIGDLLDLGEDGQQHRAFLRLADRYGGLMCLRFGMVPHVIISTPDALRAVFGGEGKKVDNIAGLPSLDVLSAMGHRAHTIFALPSQDGKWRAIRKFAAAEMLAPRRISAGAGALLQTKIVEALHREVSGHAARGTAVVFRHAVLDSILSLLLGVLYSTDLEPKERAVFRDIIEDIVGMLGTANVSDIFPPIAALDLQGLRRRMTNLFATMYRHFDDQVALRRRSREAGEAPKKDVLDTVLDKESEWKQEGSLLSHDVMRALLSNMLLTYCTNTHADLTYQDLYGAGASTTAALIEWGMVDLLQNPEVMRKVKEELSGVLGDKPLMEESDIARLPYLQVVVKEILRLRMVVPLVPRKAE…
288	292	chr1	63529690	63532192	-1			chr1_63530112_-1	chr1_63530112_-1_Aegilops_tauschii	CYP76V5_1D_Triticum_aestivum(wheat)	100	496		CYP76V5	MADLSLVCAASLPLTLLAAYALQPLADARRRLPPGPRPLPVLGNLLDIGEHPHRSFASLADIHGPLMFVRLGTVPAVVATSPEAAREVLQKKNASLAARRGLDAWRVMDHDANSMVALPPRGKWRAFRQHSRAALLGPRPLDEHRAVREEEARELVRRVSAAGGAPVDVAGEAFVAMVNVLCRGMFSEKLDPAVVSELTGVAEQAAVLSGLPNVSDFFPALAALDLQGIRRKARKVLAWLYTLIDEQIERRKLSRADGDARRNDLLDVLLDMDGDVQDEDGWVMNKESIRGLFMELLLGATSVPTTIEWAMSELLQNPPAMHKLQAELRNVLGTRPCTWMEESDTGSLPYLQAVVKETLRLHPPVPFATGLAEEAVEIEGYNVPKGTTALVNIWGICRN…
289	293	chr2	2439735		1	frameshift after RVIM, possible pseudogene		chr2_2439735_1	chr2_2439735_1_Aegilops_tauschii	CYP76AS5_2B_Triticum_aestivum(wheat)	90.52	517		CYP76AS8	MWFSALLACIAVTTLITIHVVHILHKHTRRKSVSPPRPPGPAGHPILGNLLYVIGPLRNNPHTALATLAQTYGPILSLRLGLTRTIVVVSSAAAAHEALAKNDAALASRLVPDTVHAMSYGATSMVFLPSSNPLWKQDRVIMGARFSSSRGLDTIRPILECHVGRLTEYLRACSGTGMPVIIREAVNRTVLNVISNILFSEDVADLSAPGAQPFRGLIVPVLEEWSKSNVSDAFPFLAPIDHLFGSRRRISIHLAKLFNFFDQEIVQRRLARNGTGTGSKKNNDVLDILLERHAMSKLTRQEIITFLTDMFIAASDTSTVTVQWAMAQLLRHPEKMDKVRNELATCLAAGSSDFVRESDLDNLPYLHAVVKETLRLHPAVPLIPREVATNGVSLGGFPI…
290	294	chr2	371164579		1			chr2_371164579_1	chr2_371164579_1_Aegilops_tauschii	CYP77A50_2D_Triticum_aestivum(wheat)	100	536		CYP77A50	MRSLNSPTTFATPHLLRSSLRPSYNICYKLKSYSNSHAPGLSISSSTSLIAPMSMQQQQQQPALANLLGAMPAASMISLAFTAAVATAALFVAVAVARYNRKYRGLRLPPGPPGWPIVGNLFQVAFSGKLFIHYIRDLRREYGPILTLRMGVRTLVVISSAELVHEALVEKGAEFASRPAENTTRNIFSSNKFTVNSAVYGAEWRSLRRNMVSGMLSTSRLREFRPARLRAMDRFVARMRAEAAASADGASVWVLRNARFAVFCILLDMTFGLLDLDEEHIVHIDAVLKRVLLAVGVRMDDYLPFLRPFFWRKQLRALAVRREQVDTLLPLINRRRAILRDMQSSPPDPNVAAPFSYLDSLLDLHIEGREGADDELVTLCAELINGGTDTTATAIEWAM…
291	295	chr7	566707352		1			chr7_566707352_1	chr7_566707352_1_Aegilops_tauschii	CYP77B39_7A_Triticum_aestivum	96	528	3 aa diffs and one indel	CYP77B39	MDVNDVLLLASAVVLGLVWWRRCSKTGGVDGLPPGPPGWPVVGNLFQVILQRRPFMYVVRDLREKYGPIFTMRMGQRTLVIVTDADLIHDALVKQGPMFASRPADSPIRLLFSVGKCTVNSAPYGPLWRALRRNFVAEIVSPQRVKGFSWIREWAMGNHLRRIRAEHAKTGAVRMMASCRLTICSILICICFGAKIPDELIVEIEEVLKDVMMISLPKLPDFLPLLTPLFRRELAEAKNLRRRQLNCLLPLVRARREFLRTGGNACKAAGEGNRVIGGVEMMSPPGEAYVDSLFDLEPPGRGKRLGEEELVTLCSEVMSAGTDTSATALEWVMMHLILDPAAQERVYDEVVAKAGKTARITEADVEALPYLQAVVKETFRRHPPSHFVLSHAATRDAEL…
293	296	chr2	128248293		-1			chr2_128248293_-1	chr2_128248293_-1_Aegilops_tauschii	CYP78A262_2D_Triticum_aestivum(wheat)	92.77	553	1 aa diff and one indel	CYP78A262	MDLSMATGPEDSLLLLLLPATTLLPPLLAVLLLAASLLWLSPGGPAWALSLCLRPPPGPPGVVTALSSPVAHRVMAALSRSVHGGAALMSFSVGLTRVVVSSRQDTAREILVNPAFGDRPVKDAARHLLFHRAMGFAPSGDTHWRALRRLAAAHLFGPRRVAASAPHRSSIGARMLGDVASLMARHGEVAPRRFLHAASLNHVMAVVFGKRYDDFTSQEGALVEEMVNEGYDLLGTFNWADHLPFLKWLDLQGVRRRCNRLVRQVEAYVGNIIQEHKARRASGSGIADELSGDFVDVLLGLDGEDKMSESDMIAVLWVRLGETMYSTGVPTKRSRVRLIAFKPWSCVLLIMGCTFQEMIFRGTDTVAILMEWIMARMVLHPEIQSKARVELDAVVGRGR…
292	297	chr4	492605539		-1			chr4_492605539_-1	chr4_492605539_-1_Aegilops_tauschii	CYP78A263_4D_Triticum_aestivum(wheat)	99.82	552		CYP78A263	MESSVQSWWVLPLTLLPAISGGQHDGTTTTLAAVATSFAYLAVLACLAWAAAALLYWAHPGGPAWGRYWRGRGQGAGLRRAIPGPKGLPVVGSLGLMSGLAHRSLAAEAARRPGAKRLMALSLGPVRAVVASHPDVAKEILDNPAFAARPLNHAAYGLMFHRSIGFAEHGPYWRALRRVASGHLFGPRQVDAFTPYRARVAGDVVAALRGAGAGVVELRGVLRRASLYYIMRFVFGKEYDVSAPQSSSGEVEELLEMVHEGYELLGKENWCDYFPGLAAVDPQGIGARCAELMPRVNRFVHGIIREHRAKATTAAGGGEVPRDFVDILLSLQDSEGLADADIAAVLWEMIFRGTDAMAVLMEWAMARLVLHRDVQAKVHRELDEVVGRSSPVAEPSLPA…
294	298	chr5	421739132		-1			chr5_421739132_-1	chr5_421739132_-1_Aegilops_tauschii	CYP78A264_5D_Triticum_aestivum(wheat)	99.81	538		CYP78A264	MELRPSVRRPCRLSCGYKTGPRPDHDSPTSTHAPPQKPQQHPNQSKAGEESMATPDDSAASWLLYLSLAAKCGGDHPGLLAGLLAVCAAAFAITCLLHWCFPGGPAWGRWWLTRRLKGSLVPGPRGLPLIGSMWLMTGLAHRKLAAEASRLGGRAKRLMAFSLGETRMVVAAHPDVAREILNSPAFADRPIKESAYGLLFHRAIGFAPHGAYWRALRRVASTHLFSPWQVTASAPQRAVIAHQMVAALVSAGAGVEVRRVLRRASLHNVMWSVFGRRYDLGTGKESYEVRELSRLVDEGYDLLGQLNWSDHLPWLARFDPQGTRARCSRLVPRVNSFVGRIIDDHRSAAPSAAVKDFTDVLLSLQGGDRLADADMTAVLWEMVFRGTDTVAVLMEWVLA…
295	299	chr7	259573519		-1			chr7_259573519_-1	chr7_259573519_-1_Aegilops_tauschii	CYP78A265_2D_Triticum_aestivum(wheat)	100	552		CYP78A265	MAPSEECGWLLYVSLAAKCCANGDGEPYRVVGFVAVLLAAFVVTSLLRWASQGGAAWGRYWWTRKGLGIGEARIPGPRGFPVIGSMGLMTGLAHRKLAAAAAGNVRRRRLMAFSMGETRVVVTADPDVARELLASPAFADRPVKESAYGLMFHRAIGFAPYGAYWRTLRRVSSSHLFSPRQVAASAAQRAVIARQMVDAMRPVGGAGVKHVEARRFLKRASLHNVMWSVFGRRYELDEAGSGEAAELKSLVDEGYDLLGQLNWSDHLPWLARFDPQKIRSRCSALVPRVNCFVGRIIDEHRAARNDDADAVVDFTDVLLSLQGSDKLSDADMIAVLWEMIFRGTDTVAVVIEWVLARLVLHQDVQARVHEELDRVVGPNRAVTESDAASLVFLQAVVKE…
296	300	chr2	9842592	9844388	-1			chr2_9843047_-1	chr2_9843047_-1_Aegilops_tauschii	CYP79A141_2D_Triticum_aestivum	94	522		CYP79A141	MATLLLYFLKKSKRAVLSQRQQARRGLLPPGPATLPIIGNMHQMVWNKPAVFRWIHRLLKEMNTDIMCLRLGATHVIVVACPEIACEVLRKKDEFFASRPTTFASGTVSFGYKGSVLSPHGEQWKKMRRVLTLEILTPSMEQKLHHLRKEEYDHLVRYVNNTACCGMMPHAKNIVNVRHVAQHFCCNLIRRLVFGKRFFSNLPSSSTNGPGYEEEAHVAALFTALNHVYSFCVSDYIPALVGLDLDGHEQVSMDVMRTINRLHDPIIRERIHERSSTLEKGGEDKGARDFLDVLVHLKDAEGQPLLSLQEIRAQTAEMVLAAVDNPSNAVEWALAEMMNRPEIMQKVTDELDAVVGKDRLVQESDIPRLNYLKSCIREAFRIHPYHALNLPHVAMVETT…
297	301	chr2	9366010	9367744	-1			chr2_9366486_-1	chr2_9366486_-1_Aegilops_tauschii	CYP79A142_2D_Triticum_aestivum(wheat)	99.25	535	2 aa diffs to chr2_9557100, 6 aa diffs to chr2_9918400	CYP79A142a	MTLGTLVIMVTLLVYFFLKNKRVLLSQQQRGRRGRLPPGPATLPIIGNMHQLILNKPAVFRWIHGLLKEMNTDIMCLRLGATHVIVVACPQIACEVLRKKDEVFASRPTTFASGLFSFGYKGSIFSPHGEQWKKMRRVLTVEILASSMERKLYHLRKEEYDHLVRYINKTYCSDMACPGNIVNVRHVTQHFVGNMIRRLVFGKRYFSDLPASSTSGPGHDEVAHVAALFTALNHLYSFCVSDYFPALIGLDMDGQEKVSKDAMQTLNRLHDPIIEERIHERSSTLEKCGEKKEARDFLDVLVHLKDAEGQPLLSLQEIRAQTAEMMFAAVDNPSNAVEWALAEMMNVPEIMQKATEELDTVVGKDRLVEESDIPRLNYLKSCIREAFRIHPYHALNVPH…
298	302	chr2	9556624	9558358	-1	2 aa diffs to chr2 9366486		chr2_9557100_-1	chr2_9557100_-1_Aegilops_tauschii	CYP79A142_2D_Triticum_aestivum(wheat)	99.25	535	these three genes are nearly identical but they are in three different locations	CYP79A142b	MTLGTLVIMVTLLVYFVLKNKRVLLSQQQRGRRGRLPPGPATLPIIGNMHQLILNKPAVFRWIHGLLKEMNTDIMCLRLGATHVIVVACPQIACEVLRKKDEVFASRPTTFASGLFSFGYKGSIFSPHGEQWKKMRRVLTVEILASSMERKLYHLRKEEYDHLVRYINKTYCSDMACPGNIVNVRHVTQHFVGNMIRRLVFGKRYFSDLPASSTSGPGHDEVAHVATLFTALNHLYSFCVSDYFPALIGLDMDGQEKVSKDAMQTLNRLHDPIIEERIHERSSTLEKCGEKKEARDFLDVLVHLKDAEGQPLLSLQEIRAQTAEMMFAAVDNPSNAVEWALAEMMNVPEIMQKATEELDTVVGKDRLVEESDIPRLNYLKSCIREAFRIHPYHALNVPH…
298.1	303	chr2	9918400	9920115	-1	frameshift after WTEP, possible pseudogene		chr2_9918400_-1	chr2_9918400_-1_Aegilops_tauschii	CYP79A142_2D_Triticum_aestivum(wheat)	98.87	529		CYP79A142c	MTLGTLVIMVTLLVYFVLKNKRVLLSQQQRGRRGRLPPGPATLPIIGNMHQLILNKPALFRWIHGLLKEMNTDIMCLRLGATHVIVVACPQIACEVLRKKDEVFASRPTTFASGLFSFGYKGSIFSPHGEQWKKMRRVLTVEILASSMERKLYHLRKEEYDHLVRYINKTYCSDMACLGNIVNVRHVTQHFVGNMIRRLVFGKRYFSDLPASSTSGPGHDEVAHVAALFTALNHLYSFCVSDYFPALIGLDMDGQEKVSKDAMQTLNRLHDPIIEERIHERSSTLEKCGEKKEARDFLDVLVHLQDAEGQPLLSLQEIRAQTAEMMFAAVDNPSNAVEWALAEMMNVPEIMQKATEELDIVVGKDRLVEESDIPRLNYLKSCIREAFRIHPYHALNVPH…
300	304	chr2	8660108	8661801	-1			chr2_8660572_-1	chr2_8660572_-1_Aegilops_tauschii	CYP79A143_2A_Triticum_aestivum(wheat)	97.11	519		CYP79A143	MATVLFFALKNRKVLLSVKSEQHQLPPGPPTLPFIGNIHQMMWNKPAVFRWIHRLLQEMDTDIMCLRLGAIHVVAVTCPQIACEVLRKKDEVLASRPATFASGSFSFGYKGTIVTPHGEQWKKMRRVLTSEILTPSMEQKLHHLRQEECDHLVTYINNTCMACPNNLVDVRHVAQHFCGNMIRRLVLGKRYFGSELPGSSASGPGHDEMAHVAALFTLLNYLYNFCVSDYFPALVGLDWDGHEKVSKDVMGILNRLHDPIIEKRIIERSNLRNGGGSKEARDFLDVLVYLDDADGQPLLSVDDIRAQIVEMMYATIDNPSNAVEWALAEMVNKPEVMKKATDEIDAVVGKDKLVQESDIPRLNYLKSCIREAFRIHPYHAFNPPHVAMVDTTIAGYTIP…
301	305	chr4	520603656		1			chr4_520603656_1	chr4_520603656_1_Aegilops_tauschii	CYP79A146_4D_Triticum_aestivum(wheat)	99.28	552		CYP79A146	MLPILLGKVSNMSLATIQTRSMTSCSGLSLATLVMMATLLLFFLKKNKNAVPQTRQLPPGPATLPFIGNMHQMIWNKPAVFRWIHRLLKEMNTDILCLRLGATHVIAVTSPEIACEVLRKNDEVFASRPITFASGSFSYGYKGSILSPHGEQWKKMRRVLASEVLAPSMEQKVQHIREEEYDHLVRYINKISCCSSEAIVDVRHVARHFCGDMIRRLVFGKRYFSNLPASSTSGPGHDELAHVAALFTLLNHVYSFCVSDYFPALQGLDLEGHEMVCSDVMRTINLLHDPIIEDRIRERSNSLHSRAEKKEARDFLDVLVYLEDAQGQPLLSLEDIRAQTTEIMFAIIDNPSNAVEWALAEMINRPEVMQKAIDELDTVVGKERLVQESDISQLNYLKS…
302	306	chr5	386585460		-1			chr5_386585460_-1	chr5_386585460_-1_Aegilops_tauschii	CYP79A147_5D_Triticum_aestivum(wheat)	96.56	552		CYP79A147	MEKCSSNATATMPLVNAGAPALAMLAATAATIVLLLAFLRRQSSKTTLSRRGGLPPGPAGLPVLGNMHQMLANKPVFRWLHRLLEHAGGEIVRVRLGPVHVVVVACPAMAREVLRKNDAVFADRPTTFAAESFSVGYRSASISPYGDQWRKMRRVLTAEVLSPATEHRLRGAREEEADHMLRWVHAQCNACGIIDVRHLARHFCGNLIRRLTLGRRHFRDQQPDAVGAPGPDEEEHVDALFAVLSYLDAFAVSDYFPALVGLDLDGHEKVIRGVMRTLNRLHDPVIEERVEEWRLLRKAGERRDVADFLDVLASLDGAGGRPLLTVEEIKAQAIDIMIASVDNPSNAVEWALAEMMNKPELMRKAMEELDAVVGRDRLVQEPDLRSLNYLKACIREAFR…
306	307	chr7	525711342		1			chr7_525711342_1	chr7_525711342_1_Aegilops_tauschii	CYP79A149_7D_Triticum_aestivum(wheat)	99.81	536		CYP79A149	MLACCCFVVSQLLIVITLIYLVITKSKVRCSTCSSATVPLPLPPGPWPWPVVGSLPEMVVNKPAFRWIHRVMKDMGTDIACFRLGGVHVVSITCPKIAREVLKKQDKNFSSRPLTFASGAISSGYKDAVLSPFGDQWMKMRKVLTSEIICPSRHKWLHDKRADEADNLTRYIYNLTARGLSSSTSRLANVNVRHVARHYCGNVIRRLVFGQRYFGEPQPDGGPGPMEVEHMDASFALLGFTFAFCVSDYLPCLLGLDLDGHEKIIKEANTKVDRLHDVVIEDRWRQWNNSERQDGVQDFLDVLITLADGDGKPLLSIDEVKAQSKGIILAAIDNPSNAVEWALAEMVNNPELLARAVEEMDRVVGRERLVQESDIMQLNYLKACIREAFRLHPIAPFNL…
307	308	chr7	524951247		1			chr7_524951247_1	chr7_524951247_1_Aegilops_tauschii	CYP79A151_7D_Triticum_aestivum(wheat)	99.81	534		CYP79A151	MLACCCFVSQLLIVITLIHLAMTKSKVRSGTCSSATVPLPLPPGPWSWPLVGSLPEMVLNKPAFRWIHRVMKDMGTDIACFRLGGVHVVPITCPKIAREVLKKQDKNFLSRPLTFASDAISCGYKDVVLTPFGDQWMKMRKVLTSEIICPSRHKWLHDKRADEADNLTRYIYNLTTGGSSSTLGLANVNVRHVTRHYCGNVIRRLVFGQRYFGEPQPDGGPGPMEVEHMDALFTLLGLLFSFCVSDYLPCLLVLDLDGHEKIIKEANTKVDRLHNMVIEERWRQWNSGERQDGVQDLLDVLIMLADGDSKPLLNIDEVKAQCKDIILAAIDNPSNAVEWALAEMVNNPELLAKAVEEMDRVVGRERMVQESDIMQLNYLKACIREAFRVHPVAPFNLPH…
299	309	chr2	9881068	9882766	-1			chr2_9881523_-1	chr2_9881523_-1_Aegilops_tauschii	CYP79A162-FRAGMENT_U_Triticum_aestivum	98	155	3 aa diffs	CYP79A162	MALGTLVIIATMLVYFLLRNKRVLLSQKQRGRRGRLPPGPAVLPIIGNMHQVILNKPAVFRWIHGLLKEMNTDIMCLRLGATHVIVVTCPQIASEVLRKNDEVFASRPTTFASGIFSFGYKGSIFSPHGDQWKKMRRVLTVEILASSMERKLHHLRKEEYEHLVRYINKTHCSDMACPGNIVNIRHVTQHFVGNMIRRLVFGKRYFNDLLASSTSGPGHDEVAHVAALFTALNHLYSFCVSDYFPALIGLDLDGHEKVSKDAMQTINRLHDPIIEERMRERSSTLEKGPRDFLDVLVHLKDAEGQPMLSLEDIRAQTAEMMFAAVDNPSNAVEWALAEMMNMPEIMQKATEELDAVVGKYRLVEESDIPQLNYLKSCIREAFRLHPYHALNVPHVAMAD…
303	310	chr5	559956807		-1			chr5_559956807_-1	chr5_559956807_-1_Aegilops_tauschii	CYP79A145_4A_Triticum_aestivum(wheat)	94.92	531		CYP79A145	MLVALLQFTKLASMAMEQLGAFTMLVLLLTFIYLVLRLRRKDSKPHTLPLPPGPAPWPVVGSLPEMMLNKPAFRWIHRTMEEMGTDIVCVRLGGVHVVAVTCPTIAREVLRKQDATFASRPLTFASAAFSRGYKNAVLSPFGDQWRKMRRVLTSEIVCPSRHRWLHDRRADEADNLTHYVYSLATTTKGSSLGSGAVDVRHVARHYCGNVIRRLLFGRRYFSEPGRRDGGPGPMEVEHMDALFTSLGLLYAFCVSDYLPWLRGFDLDGHEKMVKEANATMNRLHDAVIDERWGQWKSGERKELDDFLDVLITLKDAEGKPLLTIEEIKAQSQDITFAAVDNPSNAVEWALAEMVNAPEVMAKAMEEMDRVVGRERLMQESDIPQLSYAKACIREAFRLH…
305	311	chr7	525657908		1	pseudogene		chr7_525657908_1	chr7_525657908_1_Aegilops_tauschii	CYP79A149_7D_Triticum_aestivum)	96	536		CYP79A163P	ILACCCFVVSQLLIIIMLIYLVITKSKVRCGTCSSAMVPLPLPPGPWPWPVVGSLPEMVVTKPAFRWIHRVMKDMGTDITCFRLGSVHVVPITCPKIAREVLKKQDKNFSSRPLTFASGAISSGYKDAVLSPFGDQWMKMRKVLTSEIICPSRHKWLHDKRADEADNLTRYIYNLTTGGLSSSTSGLANINVRHVARHYCGNVIRRLVFGQRYFGEPQPNGGPGPMEVEHMDASFALLGFTFAFYVSDYLPCLLCLDLDGHEKIIKEANTKVDRLHDVVIEERWR*WNSSERQDGVEDFLDVLITLADGDGKPLLNIDEVKAQSKGIILAAIDNPSNAVEWALAEMVNNPELLAKAVEEMDRVVGRERLVQESDIMQLNYLKACIREAFRLHPIAPFNL…
304	312	chr7	563307261		1	frameshift before AQSK		chr7_563307261_1	chr7_563307261_1_Aegilops_tauschii	CYP79A149_6A_Triticum_aestivum(wheat)	96.27	536		CYP79A164	MLACCCFVVSQLLIVITLIYLVMTKSKVRRGTCSSAMVPLPLPPGPWPWPLVGSLPEMVLNKPAFRWIHRVMKDMGTDIACFRLGGVHVVPITCPKIAREVLKKQDKNFSSRPLTFASGAISSGYKDAVLSPFGDQWMKMRKVLTSEIICPSRHKWLHDKRADEADNLTRYIYNLTAGRSSSSTSGLANVNVRHVARHYCGNVIRRLVFGQRYFGEPQADGGPGPMEVEHMDASFALLGFTFAFCVSDYLPCLLGLDLDGHEKIIKEANTKVDRLHGVVIEERWRQWNSGERQDGVQDFLDVLITLADGDGKPLLSIDEVKAQSKGIILAAIDNPSNAVEWALAEMVNNPELLAKAVEEMDRVVGRERLVQESDIMQLNYLKACIREAFRLHPIAPFNL…
308	313	chr6	57364890		-1			chr6_57364890_-1	chr6_57364890_-1_Aegilops_tauschii	CYP79A151_U_Triticum_aestivum	99	499	1 aa diff	CYP79A165	MLACCCFVSQLLIVITLIHLAMTKSKVRSGTCASAMVPLPLPPGPWSWPLVGSLPEMMLNKPAFRWIHRVMKDMGTDIACFRLGGVHVIPITCPKIAREVLKKQDKNFLSRPLTFASDAISCGYKDAVLTPVGDQWMKMRKVLTSEIICPSRHKWLHDKRADEADNLTRYIYNLTAVGSSSTLGLANINVRHVTQHYCGNVIRRLAFGQRYFEEPQPDGGPGPMEVEHMDASFTLLGLLFSFCVSDYLSCLLGLDLDGHEKIIKEANTKVDRLHNMVIEERWRQWNNGERQDGVQDFLDILITLVDGDGKPLLSIDEVKAQCKDIILAAIDNPSNAVEWALAEMVNSPELLAKAVEEMDQVVGRERLVQESDIMQLNYLKACIREAFRLHPVAPFNVPH…
309	314	chr7	525229840		-1	pseudogene		chr7_525229840_-1	chr7_525229840_-1_Aegilops_tauschii	CYP79A151_7D_Triticum_aestivum(wheat)	86.19	210		CYP79A166P	DRLLAVIENP*NVVEWALAEMVNNPELLAKAVEEMDRVLGCERLEHESDIMQLNYLKACICEAFRRHPVASFNMPHVAIADTIVAGYRVPKGSHVILNRMALGQNPTVWDEPLHFKPERHIEDNINVVLSESELRFISFSTGQRGCITASLGTTMSVMLFGRLLHGFTWTKPAGVSAINLSKSKHNLFKEKPLVLHAEPRLAVHLYPLMHH
310	315	chr2	616541342		1	frameshift at FDYR		chr2_616541342_1	chr2_616541342_1_Aegilops_tauschii	CYP81A47_2D_Triticum_aestivum	94	519	100% with one indel	CYP81A47	MELGSFHFFYVAAITFLTVYLLHSFLPTKKRPRRRLPPGPALALPFLGHLPFLKQPLHATLARLAARHGPVFSLRLGSRPAVVVASAEVARECFSSELDATLANRPRFPSLQEVSFDYRGAHWRAARRVAVVHLLSARRVDLMSDAVVARELRALVRRLARVAAGGAARVELKRRLFDLSHSVLMEAIARSRNTYSDDGADMSQEAREMKDIVDAIVPLVGVANLWDYLPVLRWLDWRGVRRRLADATSRRNAFIYKLIDGERQKRLNAAADAADKQQEEEEQSMIGVMLSLQKSEPDLYTDTFIAALVANLLGAGTETTSTTTEWAMALLLNHPAVLKEAQEEIDTHLSLIGEPSRLLDKKDLPHLPYLHCIISETLRLCPAAPLLLPHEAAADCQLH…
311	316	chr2	316339260		1			chr2_316339260_1	chr2_316339260_1_Aegilops_tauschii	CYP81A48_2D_Triticum_aestivum(wheat)	99.81	522		CYP81A48	MSTAERTMEMGSFPFFYVAAITFLTALLLRSFLTKKRRRLPPGPALAVPFLGHLPFLKKPLHATLARLAARHGPVFSLRLGSRPAVVVTSAELARECFSSDLDATIANRPHFPSVREVSFDYTVLTLANYGAHWRAARRVAVVHLLSARRVDLMSDAVVARELRALVRRLARLTAGGAARVELKRRLFDLSHSVLMEALARSRNTYSDDEADMSQEAREMKDVVDAIVPLVGVANLWDYLPVLRWFDWRGVGRQLADTTSRRNAFIYKLIDRERRKQQAAADKQEEEQGMIGVMLSLQKSEPDLYTDNFIAALVANLLGVGTETTSTTTEWAMALLLNHPAVLKKAQEEIDAHLSGEPSRLLDKKDLPHLPYLHCIINETMRLCPAAPLLLPHEAAADC…
312	317	chr3	498157691		1			chr3_498157691_1	chr3_498157691_1_Aegilops_tauschii	CYP81A49_3D_Triticum_aestivum(wheat)	100	532		CYP81A49	MELGAYYSMVMSNLMLVLTVSMVSATYLLMRKMRGKKRLPPGPGLALPLVGHLHLLREKPLHVTLAGLAARHGPVLSLRLGRRDAVVVTSLRLAKECFSTELDVNFANRPRFPSAREVSFGYTGLSAASYGPHWRSMRRIATVHLLSARRVDLMSDATIAGETGAMVRRLARAAAAASGGVTRVELKRNLFELSHGVLMEAIAGAKGTRDGSDADMSKEAHEFKKVVDEIVPLLGMANLHDHLPGPLRWLDFGGVRRRLTELVNRRNALMHGLIDAERQRRPQEDHATDELLPESKSMIGVMLSLQESDPQQYTDTFIAALVTNLFGGGTVTTSATMEWAMSLLLNHPDALQKAREEVSARVGHARLLSREDLPHLPYLQCIIIETLRLYPAAPLLAPH…
313	318	chr3	15374337		-1			chr3_15374337_-1	chr3_15374337_-1_Aegilops_tauschii	CYP81A50_3D_Triticum_aestivum(wheat)	100	554		CYP81A50	MVMSNLMLVLTVFMVSATYLLMRRMRGKNRLPPGPGFALPLAGHPHLLREKPLHVTLAGLAARHGPVLSLRLGRRDAVVVTSLRLAKECFSSDLDVAFANRPRFPSAREVSFGYTGLPAASYGPHWRAMRRIATVHLLSARRVDLMSDAAIADETRVMVRRLARAAAAVSSGVAKVELKRNLFELSHGVLMESIAGTKGKRGAGSDADMSEEAHEFKKVVDEIMPLLGMANLHDHLPAPLRWLDLGGVRRRLTELVNRRNALMHGLIDAERERRRQEDHAADEEELLPESKSMIGVMLLLQESDPQQYTDTFIAALVTVSAPPPTGSSCTFTAKRMHISTFSALLCEEPLRRRHGDHVGDHGMGHVAAAQPPVRAAEGARGSERACWPRPPPEQGRPHL…
314	319	chr5	480990260		1			chr5_480990260_1	chr5_480990260_1_Aegilops_tauschii	CYP81A51_5D_Triticum_aestivum(wheat)	98.84	518		CYP81A51	MDKAYIAILTVAFLFLLHYILGKVSNGRRGRGAVQLPPSPPAIPFLGHLHLLEKPFHAALLRLAARLGPVFSLRLGSRRAVVVSSAECARECFTEHDVTFANRPRFPSQLLVSFDGAALATSSYGPHWRNLRRVAAVQLLSAHRVACMSGVIAGEVRAMARRLFRAAATSPGGDGAARVQLKRRLFELSLSVLMETIAQTKGTRSEADADTDMSVEAQQFKKVVDELIPYLGAANTWDYLPVLRWFDVFGVRNKILAAVSRRDAFLHRLIDNERRRLDHAGTEGDKKSMIAVLLNLQKTEPEVYTDTMMTALCANLFGAGTETTSTTTEWAMSLLLNHPAALRKAQAEIDAAVGTSRLVTADDVPRLAYLQCIVSETLRLYPAAPMLLPHQSSADCKVG…
315	320	chr5	481083047		1			chr5_481083047_1	chr5_481083047_1_Aegilops_tauschii	CYP81A52_5D_Triticum_aestivum(wheat)	99.81	517		CYP81A52	MDKAYIAILSFAFLFLLHYILGKVSNGRRSKGAVQLPPSPQAIPFLGHLHLLEKPFHAALCRLAERLGPVFSLRLGSRRAVVVSSAECARECFTEHDVIFADRPQFPSQLLVSFDGIALSTSSYGPHWRNLRRVAAVQLLSAHRVACMSGVIGGEVRAMARRLFRAAAASPGGDGAARVQLKRRLFELSLSVLMETIAQTKGTLSEADADTDMSVEAQEFKKVVDEIIPHIGAANLWDYLPVLRWFDVFGVRNKILAAVSRRDAFMLRLIDAERRRVDGGAEGDKKSMIAVLLTLQKTEPEVYTDTMIMALCANLFGAGTETTSTTTEWAMSLLLNHPAALKKAQAEIDAAVGTSRLVTADDVPRLAYLQCIVSETLRLYPAAPLLLPHQSSADCKVGG…
316	321	chr5	480941480		1			chr5_480941480_1	chr5_480941480_1_Aegilops_tauschii	CYP81A53_5D_Triticum_aestivum(wheat)	98.84	516		CYP81A53	MDKAYIAVLSFAFLFLLHYILGRKSNGSKGAVHLPPSPPAVPFFGHLHLVEKPLHAALCRLGARLGPVFSLRLGARNAVVVSSPACARECFTDHDVAFANRPQFPSQMLVSYGGTSLVSSSYGPHWRNLRRVAAVRLLSAHRVAGMSGVIAAEVRAMARRLCRAAAASPGGDGAARVELKRSLFELSLSVLMETIARTKGTRSEADGDTDMSLEAQEFKQVVDEIIPLIGAANVWDYLPVMRWFDVSGVRSRILATVSRRDAFLHRLIDAERRRMEEGGDDGEKKSMIAVLLTLQKTEPELYTDQMIIALCANMFVAGTETTSSTIEWSMSLLLNHPAALKKAQAEMDASIGTSRMVTADDVPRLSYLRCIINETLRLYPAAPLLLPHESSADCKVGGY…
317	322	chr5	480893709		-1			chr5_480893709_-1	chr5_480893709_-1_Aegilops_tauschii	CYP81A54_5A_Triticum_aestivum(wheat)	93.47	521		CYP81A54	MNTVTALAGAAALFIFITSLLRLRHPLLGGFKNKSAQLPPSPAAIPFLGHLHLLKRPFHAALARLAARHGPVFSLRLGSRPAVVVSSAAGARECFTDHDVTFADRPRFPSLQLVCFGCTTLPTSRYGPYWRNLRRVATVQLLSVHRVGCMTADIASEVRALARRLSRAAAAAPGGAALVELKRSLFEVSLSALMETVAQTKTSRGEGAEDTDMSPEAQEFKKSLDEIVPLLGGANMWDFLPVLRWFDVFGVRNKIEAAVSRRDAFLRRLIDAQRRRVVGEGEKKSMIAVLLDLQKTEPEIYTDKVIMALCMTMFSVGTETTATTAEWAMSLLLNHPDALAKAQAEMDTTVGTTRLLRADDLPRLGYLHCIISETLRLYPPVPAMIPHESSADCTVAGYH…
319	323	chr3	615481816		-1			chr3_615481816_-1	chr3_615481816_-1_Aegilops_tauschii	CYP81L1_3D_Triticum_aestivum	98	307		CYP81L1	MNNIFVFVITLLLPLFTLGCLRRRTNQSPLLPPGPPALPIIGHLYLFRGPLHRRLTRLATLYGAVFRLRFGAKNVVVVSSAQAAEECLGVHDIVFANRPQLPTGKILSYDWSTMGTASYGDYWRHIRRIGVTELLSVHRVQQYADVHTRMARSMARRLYRSAAGGRARVELKSRLFEMLMNVMTSMICARTYYGTDGEEILEVTDEVQWFRTMVEETMTLIGASTVWDYIPTLVRWLDIGGFGRRLWRLRESRTKFVQGLIEDERKKMEDGTTTGRTMIGALLSVQHKDPEDCPDQLIRALCISALEAGSSTSADTVEWAMSLMLNNPKVMVKVRDEIDSYIGKPIRLIEASDLLKLQYFRCIIMETLRLHPPTPLLVPHESSIDCTVSGFYIPKGTML…
320	324	chr6	420773184		1	pseudogene		chr6_420773184_1	chr6_420773184_1_Aegilops_tauschii	CYP81L12_6B_Triticum_aestivum(wheat)	92.08	530		CYP81L12P	MAINLLPESKHE*YYLAVLVTVLLVAPLFALMHRRSGNPRPKLPPGPVPLPVVGHLHLFKKPLHRTLARLAARHGAVLGLRFGSRSVVVVSSAQAAEECLGAQDVAFANRPQLPSGGILSYDWSTMGTTNYGPYWRHVRRIAVTEIMAAHRVDDFADVHVREARAMARGLFHAALGAMGQRARVELKSRLFELLLNTMMGMICDKSHHGAGSVDAGVSEEARWFRHMVEEAMTLSGASTVWDFLPAALRCRWLDVGGVGRRLWRLRESRTKFLQGLIDGQRKEMGKGEEGRRRTMIGALLSMQRKDPEACPDQLIRSLCISFKAGTVTSADTIEWAMSLLLNNPEVMLRAREEMDACIGEPARLLEATDLPNLPYLRCIIMETLRLYPPAPLLVLHESS…
318	325	chr3	615460430		-1	missing N-term		chr3_615460430_-1	chr3_615460430_-1_Aegilops_tauschii	CYP81L1_3B_Triticum_aestivum	96.17	313	cannot find the first exon	CYP81L-fragment1	GEEILEVTDEVQWFRTMVEETMTLIGASTVWHYIPTLVQWLDIGGFGRRLWQLRESRTKFVQGLIEDERKKKEDGTTTGRTMIGALLALQHKDTEDCPDQLIRALCISALEAGSSTSADTVEWAMSLMLNNPKVMVKVRDEIDSYIGKPIRLIEASDLLKLQYLRCIIMETLRLHPPTPLLVPHESSIDCTVSGFYIPKGTMLLVNTSAIHRDPKIWDKPTNFIPERRFEGEKCEGNMAMPFGMGRRRCPAENLGMQMVGLALGTMIQCFEWERVGEELGDMTNGFGLTAPRAVPLEAFYKPRQSMVALLSEI
321	326	chr2	24466684		-1			chr2_24466684_-1	chr2_24466684_-1_Aegilops_tauschii	CYP81M9_2D_Triticum_aestivum(wheat)	99.81	522		CYP81M9	MADAGTLSYLPLSLATVLFVLILLGILRKSRRERSLRLPPSPPSLPVIGHLHLFKKPLHRALANLAAAHGPVLLLRFGSRRVLHVTDPAAAEECLTAHDVVFANRPRLPSARHLSNGYTTLGSSSYGANWRNLRRIATVEVLSAGSLLRSAAVRTDEVRLAARRLFLEAAAHGASEPSPARANVKARAFELALNMVARMIAGKRYYGGEGDVPESEVEEAGRFREMVREYFAMHGASNLQDFLPVLGVLDIGGARRRAVRLSRKRNEWAQRLIDEHLASLDDDEGRSRRGRTMVGDLVEMQAADPEAYSDKVIRALCLSILQTGTDTSSGTIEWSMAELLNHPDAMAKARAELDEVVGMGRLLEEADLPSLPYLQCIITETLRLHPIAPLLAPHESSAA…
322	327	chr2	607746930		-1			chr2_607746930_-1	chr2_607746930_-1_Aegilops_tauschii	CYP81N17_2D_Triticum_aestivum(wheat)	99.81	515		CYP81N17	MDAATDGTASGGVFVLLLLLVAGVFAVSVRLRRRWGDGSSSAPSPPPLPLLGHLHLLKKPLHRSLAALAGPAPLLSLRLGTRRALVVSTHAAAEECFTAHDAALAGRPRMLAGEILGYGRTTVVWASHGAHWRGLRRFLAVELFSASRVATIATDRHAEVASLVENLLHDATASSGRGAGAGTITLRARLFELVLNVMLRALTARRHAGDVGRIQEIIEETFAVTGAPSFGDFFPALRWVDRLRGVEAALASLQARRDAFVTGLIDDQRRMRNAGGRDDVDKKGVIDVLLEHQETDPDYYSDTVVKGIVLVLLTAGTDTSALTTEWAMALMMTHPAAMAKARAETDAVVGTGRLVDESDLANLPYLQCVVKETLRLFPVGPIIPAHEAMEDCTVGGFRV…
323	328	chr2	607720900		-1			chr2_607720900_-1	chr2_607720900_-1_Aegilops_tauschii	CYP81N18_2D_Triticum_aestivum(wheat)	100	513		CYP81N18	MDAATEGTASGGVFVLLLLLVAGVVAVFLRLRLRWGDGSSGAPSPPSLPLLGHLHLLKKTLHRSLAALAGAAPLLSLRLGARRALVVSTHAAAEECFTAHDAALAGRPRMLAGEILGYGRTTIVWASHGAHWRGLRRFLAVELFSASRVAALAADRRAEVASLVENLLHDVDASAGGGGGTVTLRPRLFELVLNVMLRALTARRHAGDVGRIQEIIEETFAVTGAPSFGDFFPALRWVDRLRGVEAALASLQARRDAFVTGLIDDQRRMRNAGGRDDVDKKGVIDVLLEHQETDPEYYSDTVVKGIVLVLLTAGTDTSALTTEWAMALLMTHPAAMAKARAEIDAIVGMDRLVDESDLANLPYLQCVVKETLRLCPVGPIIPAHEAMEDCTVGGFHVPR…
324	329	chr5	91670295		1			chr5_91670295_1	chr5_91670295_1_Aegilops_tauschii	CYP81N19_5D_Triticum_aestivum(wheat)	100	513		CYP81N19	MPTPPMDSNMEERASGGLLLLLLIAGVVAVFVRLRRRWGHGSSRAPSPPSLPLLGHLHLLKKPLHRSLAALAGSAPLLSLRLGARRALVVSTHAAAEECFTAHDAALAGRPQLLVAEHLGYGRTTISWASDGAHWRGLRRFLAVELFSTSRLAALAADRRAEVASLGQNLLHDTSASASGGVITLRNSLFELVLNVMLHALTTRRHAGDLRRFQEIVEETFVVSDTPSIGDFFPALRWVDRLRGVEAALASLQTRRDAFVAGLINNRREMRSAGGGDVEKKGVIDVLLEHQETDPGYYTDTVVKGIVLVMLTAGTDTSALTTEWAMALLLKHPGVMAKVRAEIDANVGMSRLVEESDITNLPYLQCVVKETLRLCPVGPVIPAHEAMEDCTVGGFHVER…
[truncated: 252 more rows]

## Sheet: You
Gene	Chromosome	Start	End	Strand	RGA Types
evm.model.Aet_chr_1.3	Chr1	48119	49387	+	RLK
evm.model.Aet_chr_1.22	Chr1	513044	516166	-	RLK
evm.model.Aet_chr_1.25	Chr1	545854	547831	-	CN
evm.model.Aet_chr_1.38	Chr1	909513	913057	+	NBS
evm.model.Aet_chr_1.39	Chr1	941167	943740	+	CNL
evm.model.Aet_chr_1.46	Chr1	1133555	1135508	-	CN
[truncated: 1,917 more rows]
